# Supplementary material for: Time-Course Transcriptome Analysis of Bacillus subtilis DB104 during Growth
Source: Microorganisms. 2023 Jul 28;11(8):1928. doi: 10.3390/microorganisms11081928 (PMC10458515; doi:10.3390/microorganisms11081928)
Supplement: Supplementary file 1 [file microorganisms-11-01928-s001.zip › supplementary File S2.xlsx]

## Sheet: S1
Table S1. Summary of RNA-seq and the reads mapped to the genome of Bacillus subtilis subsp. subtilis str. 168
Sample	Raw reads	Cleaned reads	Mapped reads (%)	GC (%)	Q20 (%)	Q30 (%)
8H-1	36217656	35440792	32,325,224 (91.21)	46.13	98.71	95.42
8H-2	21883398	21487118	19,875,864 (90.44)	47.03	98.82	95.87
8H-3	24327000	23861420	21,398,108 (89.68)	46.65	98.63	95.32
10H-1	36440770	35651874	32,574,472 (91.37)	46.61	98.62	95.2
10H-2	22551284	22129162	19,543,468 (88.32)	46.92	98.78	95.77
10H-3	27183812	26631502	23,760,294 (89.22)	46.28	98.54	95.04
12H-1	24835858	24298752	21,096,358 (86.82)	46.12	98.55	95.03
12H-2	30961300	30421612	27,871,296 (91.62)	46.23	98.75	95.69
12H-3	35456960	34770258	31,449,530 (90.45)	46.22	98.41	94.79
15H-1	36307262	35526946	32,715,938 (92.09)	45.81	98.65	95.26
15H-2	36114806	35289396	31,972,550 (90.60)	46.26	98.36	94.64
15H-3	26409210	25926768	23,632,362 (91.15)	46.3	98.83	95.9
18H-1	36476524	35756134	32,795,504 (91.72)	44.93	98.75	95.5
18H-2	28491930	27779238	23,146,806 (83.32)	44.98	98.19	94.16
18H-3	22133558	21743592	19,751,952 (90.84)	45.44	98.74	95.59
24H-1	21661780	21238576	19,833,298 (93.38)	44.58	98.41	94.57
24H-2	23553490	23135048	20,843,772 (90.10)	45.39	98.74	95.59
24H-3	26198436	25754960	23,368,982 (90.74)	45.43	98.74	95.61

## Sheet: S2
Table S2. Primers used for RT-qPCR analysis
Gene		Sequence (5' to 3')
cotD	F	cttgaaaatgctgatgcgta
	R	cacagcatacaacaaacgta
spoIIID	F	gggaagtacatcgtggagac
	R	aggcagacgctctgttaaat
yqfX	F	gaggaaacagctgctgaaat
	R	ctattccccgtccttcattg
spmH	F	acaacagcctgacactcgac
	R	gtcagcgtatctaccccagt
gsiB	F	aagccactagcgaaaatcat
	R	tccgccttttgagccaat
frlO	F	agccctcctgacatttactt
	R	tgatgaccaatcggtgtcat
cheY	F	gcattcacctgaccttgttact
	R	tgatgattcttgcctgcgc
gbsB	F	ccaatcacggatgcggtt
	R	tgcgccattccgtacctt
rpsJ	F	acaaatacaaagattctcgtgagc
	R	ctaatcgcataagagcatcaacag

## Sheet: S3
Table S3. Gene Ontology (GO) enrichment analysis of cluster 1
GO ID	GO description	corrected p-valulea	cluster frequencyb	total frequencyc
Biological process
162	tryptophan biosynthetic process	0.00052582	4/85 (4.7%)	9/5252 (0.1%)
6568	tryptophan metabolic process	0.00052582	4/85 (4.7%)	9/5252 (0.1%)
6586	indolalkylamine metabolic process	0.00052582	4/85 (4.7%)	9/5252 (0.1%)
42430	indole and derivative metabolic process	0.00052582	4/85 (4.7%)	9/5252 (0.1%)
42434	indole derivative metabolic process	0.00052582	4/85 (4.7%)	9/5252 (0.1%)
42435	indole derivative biosynthetic process	0.00052582	4/85 (4.7%)	9/5252 (0.1%)
46219	indolalkylamine biosynthetic process	0.00052582	4/85 (4.7%)	9/5252 (0.1%)
70394	lipoteichoic acid metabolic process	0.00052582	4/85 (4.7%)	9/5252 (0.1%)
70395	lipoteichoic acid biosynthetic process	0.00052582	4/85 (4.7%)	9/5252 (0.1%)
9072	aromatic amino acid family metabolic process	0.0010278	5/85 (5.8%)	22/5252 (0.4%)
9073	aromatic amino acid family biosynthetic process	0.0010278	5/85 (5.8%)	22/5252 (0.4%)
46417	chorismate metabolic process	0.0010278	5/85 (5.8%)	22/5252 (0.4%)
6082	organic acid metabolic process	0.001212	20/85 (23.5%)	459/5252 (8.7%)
16053	organic acid biosynthetic process	0.0029489	14/85 (16.4%)	267/5252 (5.0%)
44283	small molecule biosynthetic process	0.0035093	19/85 (22.3%)	462/5252 (8.7%)
51234	establishment of localization	0.0035093	25/85 (29.4%)	722/5252 (13.7%)
6810	transport	0.0035093	25/85 (29.4%)	722/5252 (13.7%)
51179	localization	0.0035093	25/85 (29.4%)	722/5252 (13.7%)
19350	teichoic acid biosynthetic process	0.0035199	4/85 (4.7%)	17/5252 (0.3%)
46374	teichoic acid metabolic process	0.0035199	4/85 (4.7%)	17/5252 (0.3%)
6829	zinc ion transport	0.003559	3/85 (3.5%)	7/5252 (0.1%)
42401	cellular biogenic amine biosynthetic process	0.0041123	4/85 (4.7%)	18/5252 (0.3%)
6520	cellular amino acid metabolic process	0.0055253	13/85 (15.2%)	259/5252 (4.9%)
70297	regulation of two-component signal transduction system (phosphorelay)	0.005779	2/85 (2.3%)	2/5252 (0.0%)
6576	cellular biogenic amine metabolic process	0.0066816	4/85 (4.7%)	21/5252 (0.3%)
44106	cellular amine metabolic process	0.0077434	13/85 (15.2%)	272/5252 (5.1%)
8652	cellular amino acid biosynthetic process	0.0094419	10/85 (11.7%)	175/5252 (3.3%)
6519	cellular amino acid and derivative metabolic process	0.011792	13/85 (15.2%)	287/5252 (5.4%)
9309	amine biosynthetic process	0.012791	10/85 (11.7%)	184/5252 (3.5%)
9966	regulation of signal transduction	0.013128	2/85 (2.3%)	2/5252 (0.0%)
23051	regulation of signaling process	0.013128	2/85 (2.3%)	2/5252 (0.0%)
9064	glutamine family amino acid metabolic process	0.013128	6/85 (7.0%)	69/5252 (1.3%)
44271	cellular nitrogen compound biosynthetic process	0.013691	15/85 (17.6%)	375/5252 (7.1%)
44281	small molecule metabolic process	0.014559	26/85 (30.5%)	872/5252 (16.6%)
19438	aromatic compound biosynthetic process	0.014995	6/85 (7.0%)	72/5252 (1.3%)
8150	biological process	0.014995	69/85 (81.1%)	3437/5252 (65.4%)
43648	dicarboxylic acid metabolic process	0.015271	5/85 (5.8%)	49/5252 (0.9%)
19752	carboxylic acid metabolic process	0.015502	16/85 (18.8%)	427/5252 (8.1%)
43436	oxoacid metabolic process	0.015502	16/85 (18.8%)	427/5252 (8.1%)
8356	asymmetric cell division	0.019803	2/85 (2.3%)	4/5252 (0.0%)
42398	cellular amino acid derivative biosynthetic process	0.020748	4/85 (4.7%)	32/5252 (0.6%)
44264	cellular polysaccharide metabolic process	0.020921	5/85 (5.8%)	54/5252 (1.0%)
71554	cell wall organization or biogenesis	0.021806	8/85 (9.4%)	140/5252 (2.6%)
42180	cellular ketone metabolic process	0.022225	16/85 (18.8%)	447/5252 (8.5%)
10646	regulation of cell communication	0.029577	2/85 (2.3%)	5/5252 (0.0%)
Molecular function
22857	transmembrane transporter activity	0.0010278	22/85 (25.8%)	530/5252 (10.0%)
5215	transporter activity	0.0012867	22/85 (25.8%)	543/5252 (10.3%)
46820	4-amino-4-deoxychorismate synthase activity	0.005779	2/85 (2.3%)	2/5252 (0.0%)
22891	substrate-specific transmembrane transporter activity	0.010754	12/85 (14.1%)	247/5252 (4.7%)
287	magnesium ion binding	0.013128	7/85 (8.2%)	95/5252 (1.8%)
22892	substrate-specific transporter activity	0.015271	12/85 (14.1%)	266/5252 (5.0%)
16811	hydrolase activity, acting on carbon-nitrogen (but not peptide) bonds, in linear amides	0.015685	5/85 (5.8%)	50/5252 (0.9%)
Celluler component
5886	plasma membrane	0.0010278	40/85 (47.0%)	1372/5252 (26.1%)
a p-value after FDR correction.
b The denomination represents the total number of genes with GO annotation and the numerator represents the number of each GO term genes.
c The denomination represents the number of regernce genes with GO annotation with GO annotation and the numerator represents the the number of reference genes annotated in the listed GO term.

## Sheet: S4
Table S4. Gene Ontology (GO) enrichment analysis of cluster 2
GO ID	GO description	corrected p-valulea	cluster frequencyb	total frequencyc
Biological process
6189	'de novo' IMP biosynthetic process	6.7714e-13	11/135 (8.1%)	14/5252 (0.2%)
9260	ribonucleotide biosynthetic process	7.4721e-13	17/135 (12.5%)	50/5252 (0.9%)
9259	ribonucleotide metabolic process	1.0632e-12	17/135 (12.5%)	52/5252 (0.9%)
6188	IMP biosynthetic process	1.2652e-12	11/135 (8.1%)	16/5252 (0.3%)
9152	purine ribonucleotide biosynthetic process	1.2652e-12	14/135 (10.3%)	32/5252 (0.6%)
9156	ribonucleoside monophosphate biosynthetic process	1.2652e-12	15/135 (11.1%)	38/5252 (0.7%)
9161	ribonucleoside monophosphate metabolic process	1.2652e-12	15/135 (11.1%)	39/5252 (0.7%)
9150	purine ribonucleotide metabolic process	1.7376e-12	14/135 (10.3%)	33/5252 (0.6%)
46040	IMP metabolic process	2.3952e-12	11/135 (8.1%)	17/5252 (0.3%)
9168	purine ribonucleoside monophosphate biosynthetic process	2.4415e-12	12/135 (8.8%)	22/5252 (0.4%)
9127	purine nucleoside monophosphate biosynthetic process	4.162e-12	12/135 (8.8%)	23/5252 (0.4%)
9167	purine ribonucleoside monophosphate metabolic process	4.162e-12	12/135 (8.8%)	23/5252 (0.4%)
9126	purine nucleoside monophosphate metabolic process	7.5171e-12	12/135 (8.8%)	24/5252 (0.4%)
6164	purine nucleotide biosynthetic process	1.0513e-11	14/135 (10.3%)	38/5252 (0.7%)
9124	nucleoside monophosphate biosynthetic process	1.0145e-10	15/135 (11.1%)	53/5252 (1.0%)
9165	nucleotide biosynthetic process	1.0145e-10	18/135 (13.3%)	84/5252 (1.5%)
6163	purine nucleotide metabolic process	1.2823e-10	14/135 (10.3%)	45/5252 (0.8%)
9123	nucleoside monophosphate metabolic process	2.9168e-10	15/135 (11.1%)	57/5252 (1.0%)
9117	nucleotide metabolic process	3.4808e-10	21/135 (15.5%)	130/5252 (2.4%)
6753	nucleoside phosphate metabolic process	3.8549e-10	21/135 (15.5%)	131/5252 (2.4%)
46483	heterocycle metabolic process	4.8999e-10	28/135 20.7%	246/5252 (4.6%)
34404	nucleobase, nucleoside and nucleotide biosynthetic process	1.1155e-09	18/135 (13.3%)	98/5252 (1.8%)
34654	nucleobase, nucleoside, nucleotide and nucleic acid biosynthetic process	1.1155e-09	18/135 (13.3%)	98/5252 (1.8%)
6935	chemotaxis	8.6383e-08	10/135 (7.4%)	31/5252 (0.5%)
7610	behavior	8.6383e-08	10/135 (7.4%)	31/5252 (0.5%)
7626	locomotory behavior	8.6383e-08	10/135 (7.4%)	31/5252 (0.5%)
42330	taxis	8.6383e-08	10/135 (7.4%)	31/5252 (0.5%)
55086	nucleobase, nucleoside and nucleotide metabolic process	1.3653e-07	21/135 (15.5%)	181/5252 (3.4%)
40011	locomotion	2.2265e-07	10/135 (7.4%)	34/5252 (0.6%)
8104	protein localization	4.2472e-07	12/135 (8.8%)	58/5252 (1.1%)
15031	protein transport	4.2472e-07	12/135 (8.8%)	58/5252 (1.1%)
45184	establishment of protein localization	4.2472e-07	12/135 (8.8%)	58/5252 (1.1%)
51649	establishment of localization in cell	5.2567e-06	8/135 (5.9%)	27/5252 (0.5%)
6548	histidine catabolic process	8.1092e-06	4/135 (2.9%)	4/5252 (0.0%)
9077	histidine family amino acid catabolic process	8.1092e-06	4/135 (2.9%)	4/5252 (0.0%)
9306	protein secretion	8.1092e-06	6/135 (4.4%)	13/5252 (0.2%)
19556	histidine catabolic process to glutamate and formamide	8.1092e-06	4/135 (2.9%)	4/5252 (0.0%)
19557	histidine catabolic process to glutamate and formate	8.1092e-06	4/135 (2.9%)	4/5252 (0.0%)
32940	secretion by cell	8.1092e-06	6/135 (4.4%)	13/5252 (0.2%)
46903	secretion	8.1092e-06	6/135 (4.4%)	13/5252 (0.2%)
51641	cellular localization	8.1092e-06	8/135 (5.9%)	29/5252 (0.5%)
33036	macromolecule localization	9.7978e-06	12/135 (8.8%)	78/5252 (1.4%)
44271	cellular nitrogen compound biosynthetic process	1.1824e-05	27/135 (20.0%)	375/5252 (7.1%)
7165	signal transduction	1.2418e-05	10/135 (7.4%)	53/5252 (1.0%)
44281	small molecule metabolic process	1.9238e-05	45/135 (33.3%)	872/5252 (16.6%)
44283	small molecule biosynthetic process	2.0735e-05	30/135 (22.2%)	462/5252 (8.7%)
6536	glutamate metabolic process	0.00020832	6/135 (4.4%)	22/5252 (0.4%)
15942	formate metabolic process	0.00020832	4/135 (2.9%)	7/5252 (0.1%)
9987	cellular process	0.00032814	92/135 (68.1%)	2659/5252 (50.6%)
8150	biological_process	0.00035262	110/135 (81.4%)	3437/5252 (65.4%)
23046	signaling process	0.00063648	12/135 (8.8%)	119/5252 (2.2%)
23052	signaling	0.00063648	12/135 (8.8%)	119/5252 (2.2%)
23060	signal transmission	0.00063648	12/135 (8.8%)	119/5252 (2.2%)
6547	histidine metabolic process	0.00067265	5/135 (3.7%)	17/5252 (0.3%)
9075	histidine family amino acid metabolic process	0.00067265	5/135 (3.7%)	17/5252 (0.3%)
9063	cellular amino acid catabolic process	0.0010648	7/135 (5.1%)	42/5252 (0.7%)
6807	nitrogen compound metabolic process	0.0010971	45/135 (33.3%)	1024/5252 (19.4%)
9310	amine catabolic process	0.0012103	7/135 (5.1%)	43/5252 (0.8%)
34641	cellular nitrogen compound metabolic process	0.001495	41/135 (30.3%)	911/5252 (17.3%)
9605	response to external stimulus	0.0017814	11/135 (8.1%)	114/5252 (2.1%)
44237	cellular metabolic process	0.0019053	67/135 (49.6%)	1806/5252 (34.3%)
6810	transport	0.0027391	34/135 (25.1%)	722/5252 (13.7%)
51179	localization	0.0027391	34/135 (25.1%)	722/5252 (13.7%)
51234	establishment of localization	0.0027391	34/135 (25.1%)	722/5252 (13.7%)
9064	glutamine family amino acid metabolic process	0.0039383	8/135 (5.9%)	69/5252 (1.3%)
9220	pyrimidine ribonucleotide biosynthetic process	0.0050851	4/135 (2.9%)	15/5252 (0.2%)
44249	cellular biosynthetic process	0.0050851	41/135 (30.3%)	968/5252 (18.4%)
46395	carboxylic acid catabolic process	0.0056007	8/135 (5.9%)	73/5252 (1.3%)
9218	pyrimidine ribonucleotide metabolic process	0.0063402	4/135 (2.9%)	16/5252 (0.3%)
9113	purine base biosynthetic process	0.0085834	3/135 (2.2%)	8/5252 (0.1%)
16054	organic acid catabolic process	0.0087213	8/135 (5.9%)	79/5252 (1.5%)
46131	pyrimidine ribonucleoside metabolic process	0.0094794	4/135 (2.9%)	18/5252 (0.3%)
46700	heterocycle catabolic process	0.010084	6/135 (4.4%)	46/5252 (0.8%)
44282	small molecule catabolic process	0.012722	13/135 (9.6%)	194/5252 (3.6%)
9058	biosynthetic process	0.012931	41/135 (30.3%)	1020/5252 (19.4%)
17000	antibiotic biosynthetic process	0.013702	6/135 (4.4%)	49/5252 (0.9%)
44238	primary metabolic process	0.014444	60/135 (44.4%)	1686/5252 (32.1%)
42440	pigment metabolic process	0.017849	5/135 (3.7%)	36/5252 (0.6%)
46148	pigment biosynthetic process	0.017849	5/135 (3.7%)	36/5252 (0.6%)
16999	antibiotic metabolic process	0.018597	6/135 (4.4%)	53/5252 (1.0%)
17144	drug metabolic process	0.018597	6/135 (4.4%)	53/5252 (1.0%)
8152	metabolic process	0.018815	71/135 (52.5%)	2115/5252 (40.2%)
6221	pyrimidine nucleotide biosynthetic process	0.021026	4/135 (2.9%)	23/5252 (0.4%)
6519	cellular amino acid and derivative metabolic process	0.021269	16/135 (11.8%)	287/5252 (5.4%)
19752	carboxylic acid metabolic process	0.021269	21/135 (15.5%)	427/5252 (8.1%)
43436	oxoacid metabolic process	0.021269	21/135 (15.5%)	427/5252 (8.1%)
6082	organic acid metabolic process	0.022893	22/135 (16.2%)	459/5252 (8.7%)
9112	nucleobase metabolic process	0.023046	5/135 (3.7%)	39/5252 (0.7%)
6222	UMP biosynthetic process	0.023131	3/135 (2.2%)	12/5252 (0.2%)
9173	pyrimidine ribonucleoside monophosphate metabolic process	0.023131	3/135 (2.2%)	12/5252 (0.2%)
9174	pyrimidine ribonucleoside monophosphate biosynthetic process	0.023131	3/135 (2.2%)	12/5252 (0.2%)
46049	UMP metabolic process	0.023131	3/135 (2.2%)	12/5252 (0.2%)
9448	gamma-aminobutyric acid metabolic process	0.027866	2/135 (1.4%)	4/5252 (0.0%)
9450	gamma-aminobutyric acid catabolic process	0.027866	2/135 (1.4%)	4/5252 (0.0%)
6144	purine base metabolic process	0.028778	4/135 (2.9%)	26/5252 (0.4%)
6220	pyrimidine nucleotide metabolic process	0.028778	4/135 (2.9%)	26/5252 (0.4%)
Molecular function
4642	phosphoribosylformylglycinamidine synthase activity	0.00024739	3/135 (2.2%)	3/5252 (0.0%)
22892	substrate-specific transporter activity	0.0016723	18/135 (13.3%)	266/5252 (5.0%)
16742	hydroxymethyl-, formyl- and related transferase activity	0.0036218	3/135 (2.2%)	6/5252 (0.1%)
4372	glycine hydroxymethyltransferase activity	0.0058532	3/135 (2.2%)	7/5252 (0.1%)
4637	phosphoribosylamine-glycine ligase activity	0.0068027	2/135 (1.4%)	2/5252 (0.0%)
4644	phosphoribosylglycinamide formyltransferase activity	0.0068027	2/135 (1.4%)	2/5252 (0.0%)
16810	hydrolase activity, acting on carbon-nitrogen (but not peptide) bonds	0.0080905	9/135 (6.6%)	97/5252 (1.8%)
16874	ligase activity	0.014322	10/135 (7.4%)	128/5252 (2.4%)
22891	substrate-specific transmembrane transporter activity	0.014322	15/135 (11.1%)	247/5252 (4.7%)
4871	signal transducer activity	0.014922	7/135 (5.1%)	68/5252 (1.2%)
60089	molecular transducer activity	0.014922	7/135 (5.1%)	68/5252 (1.2%)
16879	ligase activity, forming carbon-nitrogen bonds	0.015945	6/135 (4.4%)	51/5252 (0.9%)
15171	amino acid transmembrane transporter activity	0.017849	5/135 (3.7%)	36/5252 (0.6%)
5342	organic acid transmembrane transporter activity	0.021269	6/135 (4.4%)	55/5252 (1.0%)
46943	carboxylic acid transmembrane transporter activity	0.021269	6/135 (4.4%)	55/5252 (1.0%)
5275	amine transmembrane transporter activity	0.023046	5/135 (3.7%)	39/5252 (0.7%)
36	acyl carrier activity	0.027866	2/135 (1.4%)	4/5252 (0.0%)
19842	vitamin binding	0.028701	8/135 (5.9%)	100/5252 (1.9%)
Cellular component
44460	flagellum part	2.6617e-07	8/135 (5.9%)	19/5252 (0.3%)
44461	bacterial-type flagellum part	2.6617e-07	8/135 (5.9%)	19/5252 (0.3%)
44463	cell projection part	2.6617e-07	8/135 (5.9%)	19/5252 (0.3%)
9425	bacterial-type flagellum basal body	2.6799e-07	7/135 (5.1%)	13/5252 (0.2%)
9288	bacterial-type flagellum	8.6566e-07	8/135 (5.9%)	22/5252 (0.4%)
19861	flagellum	8.6566e-07	8/135 (5.9%)	22/5252 (0.4%)
42995	cell projection	8.6566e-07	8/135 (5.9%)	22/5252 (0.4%)
5575	cellular_component	1.84e-05	105/135 (77.7%)	3057/5252 (58.2%)
5623	cell	1.9238e-05	103/135 (76.2%)	2974/5252 (56.6%)
44464	cell part	1.9238e-05	103/135 (76.2%)	2974/5252 (56.6%)
5886	plasma membrane	3.894e-05	60/135 (44.4%)	1372/5252 (26.1%)
5622	intracellular	0.00011624	48/135 (35.5%)	1026/5252 (19.5%)
44424	intracellular part	0.00011624	48/135 (35.5%)	1026/5252 (19.5%)
44422	organelle part	0.0060027	8/135 (5.9%)	74/5252 (1.4%)
5737	cytoplasm	0.0089225	40/135 (29.6%)	967/5252 (18.4%)
45121	membrane raft	0.029368	6/135 (4.4%)	60/5252 (1.1%)
a p-value after FDR correction.
b The denomination represents the total number of genes with GO annotation and the numerator represents the number of each GO term genes.
c The denomination represents the number of regernce genes with GO annotation with GO annotation and the numerator represents the the number of reference genes annotated in the listed GO term.

## Sheet: S5
Table S5. Gene Ontology (GO) enrichment analysis of cluster 3
GO ID	GO description	corrected p-valulea	cluster frequencyb	total frequencyc
Biological process
30152	bacteriocin biosynthetic process	1.368e-10	9/99 (9.0%)	15/5252 (0.2%)
30650	peptide antibiotic metabolic process	1.368e-10	9/99 (9.0%)	15/5252 (0.2%)
30651	peptide antibiotic biosynthetic process	1.368e-10	9/99 (9.0%)	15/5252 (0.2%)
46224	bacteriocin metabolic process	1.368e-10	9/99 (9.0%)	15/5252 (0.2%)
9404	toxin metabolic process	2.2109e-10	10/99 (10.1%)	22/5252 (0.4%)
9403	toxin biosynthetic process	4.2937e-10	9/99 (9.0%)	17/5252 (0.3%)
43043	peptide biosynthetic process	7.6188e-10	10/99 (10.1%)	25/5252 (0.4%)
6518	peptide metabolic process	4.7454e-09	11/99 (11.1%)	39/5252 (0.7%)
19748	secondary metabolic process	1.0488e-08	10/99 (10.1%)	32/5252 (0.6%)
17000	antibiotic biosynthetic process	5.6494e-08	11/99 (11.1%)	49/5252 (0.9%)
6526	arginine biosynthetic process	9.2589e-08	7/99 (7.0%)	14/5252 (0.2%)
9294	DNA mediated transformation	9.2589e-08	11/99 (11.1%)	53/5252 (1.0%)
16999	antibiotic metabolic process	9.2589e-08	11/99 (11.1%)	53/5252 (1.0%)
17144	drug metabolic process	9.2589e-08	11/99 (11.1%)	53/5252 (1.0%)
30420	establishment of competence for transformation	9.2589e-08	11/99 (11.1%)	53/5252 (1.0%)
9292	genetic transfer	1.0732e-07	11/99 (11.1%)	54/5252 (1.0%)
51704	multi-organism process	9.4042e-07	11/99 (11.1%)	66/5252 (1.2%)
6525	arginine metabolic process	1.3891e-06	7/99 (7.0%)	20/5252 (0.3%)
9309	amine biosynthetic process	7.2092e-06	16/99 (16.1%)	184/5252 (3.5%)
7154	cell communication	7.3849e-06	11/99 (11.1%)	82/5252 (1.5%)
31668	cellular response to extracellular stimulus	7.3849e-06	11/99 (11.1%)	82/5252 (1.5%)
71496	cellular response to external stimulus	7.3849e-06	11/99 (11.1%)	82/5252 (1.5%)
9991	response to extracellular stimulus	8.0171e-06	11/99 (11.1%)	83/5252 (1.5%)
9082	branched chain family amino acid biosynthetic process	2.9e-05	6/99 (6.0%)	20/5252 (0.3%)
8652	cellular amino acid biosynthetic process	9.1356e-05	14/99 (14.1%)	175/5252 (3.3%)
9084	glutamine family amino acid biosynthetic process	0.00011858	7/99 (7.0%)	38/5252 (0.7%)
9081	branched chain family amino acid metabolic process	0.00013971	6/99 (6.0%)	26/5252 (0.4%)
9605	response to external stimulus	0.00016194	11/99 (11.1%)	114/5252 (2.1%)
44106	cellular amine metabolic process	0.00019711	17/99 (17.1%)	272/5252 (5.1%)
6519	cellular amino acid and derivative metabolic process	0.00038712	17/99 (17.1%)	287/5252 (5.4%)
9064	glutamine family amino acid metabolic process	0.00072357	8/99 (8.0%)	69/5252 (1.3%)
46394	carboxylic acid biosynthetic process	0.00073496	15/99 (15.1%)	243/5252 (4.6%)
9306	protein secretion	0.0012291	4/99 (4.0%)	13/5252 (0.2%)
32940	secretion by cell	0.0012291	4/99 (4.0%)	13/5252 (0.2%)
46903	secretion	0.0012291	4/99 (4.0%)	13/5252 (0.2%)
6520	cellular amino acid metabolic process	0.0013636	15/99 (15.1%)	259/5252 (4.9%)
44249	cellular biosynthetic process	0.0016336	34/99 (34.3%)	968/5252 (18.4%)
16053	organic acid biosynthetic process	0.0018233	15/99 (15.1%)	267/5252 (5.0%)
6591	ornithine metabolic process	0.0018453	3/99 (3.0%)	6/5252 (0.1%)
9308	amine metabolic process	0.0021897	18/99 (18.1%)	370/5252 (7.0%)
9987	cellular process	0.0025501	68/99 (68.6%)	2659/5252 (50.6%)
9098	leucine biosynthetic process	0.0029576	3/99 (3.0%)	7/5252 (0.1%)
9058	biosynthetic process	0.0040339	34/99 (34.3%)	1020/5252 (19.4%)
15628	protein secretion by the type II secretion system	0.0045108	2/99 (2.0%)	2/5252 (0.0%)
44271	cellular nitrogen compound biosynthetic process	0.0068453	17/99 (17.1%)	375/5252 (7.1%)
6551	leucine metabolic process	0.008514	3/99 (3.0%)	10/5252 (0.1%)
9099	valine biosynthetic process	0.008514	3/99 (3.0%)	10/5252 (0.1%)
51716	cellular response to stimulus	0.0091326	11/99 (11.1%)	189/5252 (3.5%)
6573	valine metabolic process	0.0098601	3/99 (3.0%)	11/5252 (0.2%)
6577	betaine metabolic process	0.0098601	2/99 (2.0%)	3/5252 (0.0%)
6578	betaine biosynthetic process	0.0098601	2/99 (2.0%)	3/5252 (0.0%)
19285	glycine betaine biosynthetic process from choline	0.0098601	2/99 (2.0%)	3/5252 (0.0%)
19695	choline metabolic process	0.0098601	2/99 (2.0%)	3/5252 (0.0%)
19752	carboxylic acid metabolic process	0.0098601	18/99 (18.1%)	427/5252 (8.1%)
31455	glycine betaine metabolic process	0.0098601	2/99 (2.0%)	3/5252 (0.0%)
31456	glycine betaine biosynthetic process	0.0098601	2/99 (2.0%)	3/5252 (0.0%)
42450	arginine biosynthetic process via ornithine	0.0098601	2/99 (2.0%)	3/5252 (0.0%)
43419	urea catabolic process	0.0098601	2/99 (2.0%)	3/5252 (0.0%)
43436	oxoacid metabolic process	0.0098601	18/99 (18.1%)	427/5252 (8.1%)
15695	organic cation transport	0.011045	3/99 (3.0%)	12/5252 (0.2%)
15697	quaternary ammonium group transport	0.011045	3/99 (3.0%)	12/5252 (0.2%)
15838	betaine transport	0.011045	3/99 (3.0%)	12/5252 (0.2%)
31460	glycine betaine transport	0.011045	3/99 (3.0%)	12/5252 (0.2%)
42180	cellular ketone metabolic process	0.012679	18/99 (18.1%)	447/5252 (8.5%)
51649	establishment of localization in cell	0.012679	4/99 (4.0%)	27/5252 (0.5%)
6082	organic acid metabolic process	0.015232	18/99 (18.1%)	459/5252 (8.7%)
30154	cell differentiation	0.015232	13/99 (13.1%)	278/5252 (5.2%)
30435	sporulation resulting in formation of a cellular spore	0.015232	13/99 (13.1%)	278/5252 (5.2%)
48646	anatomical structure formation involved in morphogenesis	0.015232	13/99 (13.1%)	278/5252 (5.2%)
51641	cellular localization	0.015232	4/99 (4.0%)	29/5252 (0.5%)
50896	response to stimulus	0.015352	15/99 (15.1%)	350/5252 (6.6%)
43934	sporulation	0.015686	13/99 (13.1%)	281/5252 (5.3%)
9653	anatomical structure morphogenesis	0.016101	13/99 (13.1%)	283/5252 (5.3%)
48856	anatomical structure development	0.016101	13/99 (13.1%)	283/5252 (5.3%)
48869	cellular developmental process	0.016101	13/99 (13.1%)	283/5252 (5.3%)
6549	isoleucine metabolic process	0.020665	3/99 (3.0%)	16/5252 (0.3%)
9097	isoleucine biosynthetic process	0.020665	3/99 (3.0%)	16/5252 (0.3%)
19627	urea metabolic process	0.022226	2/99 (2.0%)	5/5252 (0.0%)
44237	cellular metabolic process	0.028869	47/99 (47.4%)	1806/5252 (34.3%)
Molecular function
9039	urease activity	0.0098601	2/99 (2.0%)	3/5252 (0.0%)
5515	protein binding	0.010494	12/99 (12.1%)	229/5252 (4.3%)
4086	carbamoyl-phosphate synthase activity	0.015232	2/99 (2.0%)	4/5252 (0.0%)
4088	carbamoyl-phosphate synthase (glutamine-hydrolyzing) activity	0.015232	2/99 (2.0%)	4/5252 (0.0%)
4190	aspartic-type endopeptidase activity	0.015232	2/99 (2.0%)	4/5252 (0.0%)
16743	carboxyl- or carbamoyltransferase activity	0.015232	2/99 (2.0%)	4/5252 (0.0%)
70001	aspartic-type peptidase activity	0.015232	2/99 (2.0%)	4/5252 (0.0%)
3984	acetolactate synthase activity	0.022226	2/99 (2.0%)	5/5252 (0.0%)
16884	carbon-nitrogen ligase activity, with glutamine as amido-N-donor	0.023641	3/99 (3.0%)	17/5252 (0.3%)
Cellular component
15627	type II protein secretion system complex	0.0045108	2/99 (2.0%)	2/5252 (0.0%)
9986	cell surface	0.022226	2/99 (2.0%)	5/5252 (0.0%)
a p-value after FDR correction.
b The denomination represents the total number of genes with GO annotation and the numerator represents the number of each GO term genes.
c The denomination represents the number of regernce genes with GO annotation with GO annotation and the numerator represents the the number of reference genes annotated in the listed GO term.

## Sheet: S6
Table S6. Gene Ontology (GO) enrichment analysis of cluster 4
GO ID	GO description	corrected p-valulea	cluster frequencyb	total frequencyc
Biological process
6099	tricarboxylic acid cycle	2.1902e-08	11/204 (5.3%)	22/5252 (0.4%)
9060	aerobic respiration	2.1902e-08	13/204 (6.3%)	33/5252 (0.6%)
9109	coenzyme catabolic process	2.1902e-08	12/204 (5.8%)	27/5252 (0.5%)
46356	acetyl-CoA catabolic process	2.1902e-08	11/204 (5.3%)	22/5252 (0.4%)
51187	cofactor catabolic process	2.1902e-08	12/204 (5.8%)	27/5252 (0.5%)
6084	acetyl-CoA metabolic process	6.4724e-08	12/204 (5.8%)	30/5252 (0.5%)
45333	cellular respiration	9.1277e-08	14/204 (6.8%)	45/5252 (0.8%)
15833	peptide transport	3.2811e-07	10/204 (4.9%)	22/5252 (0.4%)
15980	energy derivation by oxidation of organic compounds	5.3218e-07	14/204 (6.8%)	52/5252 (0.9%)
9605	response to external stimulus	8.2335e-07	20/204 (9.8%)	114/5252 (2.1%)
19310	inositol catabolic process	1.6179e-06	6/204 (2.9%)	7/5252 (0.1%)
6935	chemotaxis	7.3552e-06	10/204 (4.9%)	31/5252 (0.5%)
7610	behavior	7.3552e-06	10/204 (4.9%)	31/5252 (0.5%)
7626	locomotory behavior	7.3552e-06	10/204 (4.9%)	31/5252 (0.5%)
42330	taxis	7.3552e-06	10/204 (4.9%)	31/5252 (0.5%)
6020	inositol metabolic process	1.2439e-05	6/204 (2.9%)	9/5252 (0.1%)
40011	locomotion	1.7667e-05	10/204 (4.9%)	34/5252 (0.6%)
46174	polyol catabolic process	0.0002656	6/204 (2.9%)	14/5252 (0.2%)
6091	generation of precursor metabolites and energy	0.00032075	15/204 (7.3%)	104/5252 (1.9%)
8104	protein localization	0.00033228	11/204 (5.3%)	58/5252 (1.1%)
15031	protein transport	0.00033228	11/204 (5.3%)	58/5252 (1.1%)
45184	establishment of protein localization	0.00033228	11/204 (5.3%)	58/5252 (1.1%)
6810	transport	0.00053172	50/204 (24.5%)	722/5252 (13.7%)
51179	localization	0.00053172	50/204 (24.5%)	722/5252 (13.7%)
51234	establishment of localization	0.00053172	50/204 (24.5%)	722/5252 (13.7%)
33036	macromolecule localization	0.0010145	12/204 (5.8%)	78/5252 (1.4%)
50918	positive chemotaxis	0.0014025	3/204 (1.4%)	3/5252 (0.0%)
103	sulfate assimilation	0.0015954	4/204 (1.9%)	7/5252 (0.1%)
15849	organic acid transport	0.0015954	15/204 (7.3%)	123/5252 (2.3%)
46942	carboxylic acid transport	0.0015954	15/204 (7.3%)	123/5252 (2.3%)
6732	coenzyme metabolic process	0.0033809	16/204 (7.8%)	147/5252 (2.7%)
55085	transmembrane transport	0.0033809	38/204 (18.6%)	539/5252 (10.2%)
50896	response to stimulus	0.0034436	28/204 (13.7%)	350/5252 (6.6%)
51704	multi-organism process	0.0039069	10/204 (4.9%)	66/5252 (1.2%)
19751	polyol metabolic process	0.004375	6/204 (2.9%)	24/5252 (0.4%)
9056	catabolic process	0.0062372	27/204 13.2%	347/5252 (6.6%)
55072	iron ion homeostasis	0.008115	6/204 (2.9%)	27/5252 (0.5%)
6101	citrate metabolic process	0.0086767	3/204 (1.4%)	5/5252 (0.0%)
8150	biological_process	0.0095494	155/204 (75.9%)	3437/5252 (65.4%)
9294	DNA mediated transformation	0.013256	8/204 (3.9%)	53/5252 (1.0%)
30420	establishment of competence for transformation	0.013256	8/204 (3.9%)	53/5252 (1.0%)
55066	di-, tri-valent inorganic cation homeostasis	0.013256	6/204 (2.9%)	30/5252 (0.5%)
51186	cofactor metabolic process	0.013419	18/204 (8.8%)	205/5252 (3.9%)
9292	genetic transfer	0.014086	8/204 (3.9%)	54/5252 (1.0%)
44275	cellular carbohydrate catabolic process	0.014086	10/204 (4.9%)	81/5252 (1.5%)
50801	ion homeostasis	0.014086	6/204 (2.9%)	31/5252 (0.5%)
55080	cation homeostasis	0.014086	6/204 (2.9%)	31/5252 (0.5%)
70814	hydrogen sulfide biosynthetic process	0.014086	3/204 (1.4%)	6/5252 (0.1%)
44248	cellular catabolic process	0.014638	19/204 (9.3%)	226/5252 (4.3%)
7154	cell communication	0.01467	10/204 (4.9%)	82/5252 (1.5%)
31668	cellular response to extracellular stimulus	0.01467	10/204 (4.9%)	82/5252 (1.5%)
71496	cellular response to external stimulus	0.01467	10/204 (4.9%)	82/5252 (1.5%)
8614	pyridoxine metabolic process	0.014878	2/204 (0.9%)	2/5252 (0.0%)
9064	glutamine family amino acid metabolic process	0.014878	9/204 (4.4%)	69/5252 (1.3%)
9991	response to extracellular stimulus	0.014878	10/204 (4.9%)	83/5252 (1.5%)
42816	vitamin B6 metabolic process	0.014878	2/204 (0.9%)	2/5252 (0.0%)
42819	vitamin B6 biosynthetic process	0.014878	2/204 (0.9%)	2/5252 (0.0%)
42822	pyridoxal phosphate metabolic process	0.014878	2/204 (0.9%)	2/5252 (0.0%)
42823	pyridoxal phosphate biosynthetic process	0.014878	2/204 (0.9%)	2/5252 (0.0%)
46164	alcohol catabolic process	0.014878	9/204 (4.4%)	69/5252 (1.3%)
48878	chemical homeostasis	0.014878	6/204 (2.9%)	33/5252 (0.6%)
33212	iron assimilation	0.015964	4/204 (1.9%)	14/5252 (0.2%)
70813	hydrogen sulfide metabolic process	0.017481	3/204 (1.4%)	7/5252 (0.1%)
19752	carboxylic acid metabolic process	0.018319	29/204 (14.2%)	427/5252 (8.1%)
43436	oxoacid metabolic process	0.018319	29/204 (14.2%)	427/5252 (8.1%)
6541	glutamine metabolic process	0.018436	5/204 (2.4%)	24/5252 (0.4%)
51716	cellular response to stimulus	0.023877	16/204 (7.8%)	189/5252 (3.5%)
6879	cellular iron ion homeostasis	0.025394	4/204 (1.9%)	16/5252 (0.3%)
9084	glutamine family amino acid biosynthetic process	0.027721	6/204 (2.9%)	38/5252 (0.7%)
Molecular function
5342	organic acid transmembrane transporter activity	0.0010145	10/204 (4.9%)	55/5252 (1.0%)
15293	symporter activity	0.0010145	10/204 (4.9%)	55/5252 (1.0%)
46943	carboxylic acid transmembrane transporter activity	0.0010145	10/204 (4.9%)	55/5252 (1.0%)
17168	5-oxoprolinase (ATP-hydrolyzing) activity	0.0014025	3/204 (1.4%)	3/5252 (0.0%)
22804	active transmembrane transporter activity	0.0033809	20/204 (9.8%)	210/5252 (3.9%)
16405	CoA-ligase activity	0.0041915	3/204 (1.4%)	4/5252 (0.0%)
51538	3 iron, 4 sulfur cluster binding	0.0041915	3/204 (1.4%)	4/5252 (0.0%)
22857	transmembrane transporter activity	0.0044502	37/204 (18.1%)	530/5252 (10.0%)
5215	transporter activity	0.0069616	37/204 (18.1%)	543/5252 (10.3%)
3774	motor activity	0.0086767	3/204 (1.4%)	5/5252 (0.0%)
16878	acid-thiol ligase activity	0.0086767	3/204 (1.4%)	5/5252 (0.0%)
22891	substrate-specific transmembrane transporter activity	0.0086767	21/204 (10.2%)	247/5252 (4.7%)
15294	solute:cation symporter activity	0.014086	5/204 (2.4%)	21/5252 (0.3%)
104	succinate dehydrogenase activity	0.014878	2/204 (0.9%)	2/5252 (0.0%)
4355	glutamate synthase (NADPH) activity	0.014878	2/204 (0.9%)	2/5252 (0.0%)
4774	succinate-CoA ligase activity	0.014878	2/204 (0.9%)	2/5252 (0.0%)
4775	succinate-CoA ligase (ADP-forming) activity	0.014878	2/204 (0.9%)	2/5252 (0.0%)
5381	iron ion transmembrane transporter activity	0.014878	2/204 (0.9%)	2/5252 (0.0%)
8177	succinate dehydrogenase (ubiquinone) activity	0.014878	2/204 (0.9%)	2/5252 (0.0%)
16635	oxidoreductase activity, acting on the CH-CH group of donors, quinone or related compound as acceptor	0.014878	2/204 (0.9%)	2/5252 (0.0%)
22892	substrate-specific transporter activity	0.014878	21/204 (10.2%)	266/5252 (5.0%)
45181	glutamate synthase activity, NADH or NADPH as acceptor	0.014878	2/204 (0.9%)	2/5252 (0.0%)
16679	oxidoreductase activity, acting on diphenols and related substances as donors	0.025394	3/204 (1.4%)	8/5252 (0.1%)
16682	oxidoreductase activity, acting on diphenols and related substances as donors, oxygen as acceptor	0.025394	3/204 (1.4%)	8/5252 (0.1%)
15291	secondary active transmembrane transporter activity	0.026363	11/204 (5.3%)	108/5252 (2.0%)
Cellular component
45121	membrane raft	5.069e-07	15/204 (7.3%)	60/5252 (1.1%)
5576	extracellular region	1.4631e-06	18/204 (8.8%)	96/5252 (1.8%)
5886	plasma membrane	4.0037e-06	88/204 (43.1%)	1372/5252 (26.1%)
9288	bacterial-type flagellum	3.8165e-05	8/204 (3.9%)	22/5252 (0.4%)
19861	flagellum	3.8165e-05	8/204 (3.9%)	22/5252 (0.4%)
42995	cell projection	3.8165e-05	8/204 (3.9%)	22/5252 (0.4%)
44460	flagellum part	0.00015222	7/204 (3.4%)	19/5252 (0.3%)
44461	bacterial-type flagellum part	0.00015222	7/204 (3.4%)	19/5252 (0.3%)
44463	cell projection part	0.00015222	7/204 (3.4%)	19/5252 (0.3%)
5575	cellular_component	0.002918	144/204 (70.5%)	3057/5252 (58.2%)
43234	protein complex	0.0041915	16/204 (7.8%)	151/5252 (2.8%)
9424	bacterial-type flagellum hook	0.014086	3/204 (1.4%)	6/5252 (0.1%)
9425	bacterial-type flagellum basal body	0.014878	4/204 (1.9%)	13/5252 (0.2%)
42709	succinate-CoA ligase complex	0.014878	2/204 (0.9%)	2/5252 (0.0%)
45252	oxoglutarate dehydrogenase complex	0.014878	2/204 (0.9%)	2/5252 (0.0%)
a p-value after FDR correction.
b The denomination represents the total number of genes with GO annotation and the numerator represents the number of each GO term genes.
c The denomination represents the number of regernce genes with GO annotation with GO annotation and the numerator represents the the number of reference genes annotated in the listed GO term.

## Sheet: S7
Table S7. Gene Ontology (GO) enrichment analysis of cluster 5
GO ID	GO description	corrected p-valulea	cluster frequencyb	total frequencyc
Biological process
32502	developmental process	3.9766e-16	53/229 (23.1%)	310/5252 (5.9%)
43934	sporulation	2.1249e-09	40/229 (17.4%)	281/5252 (5.3%)
9653	anatomical structure morphogenesis	2.1249e-09	40/229 (17.4%)	281/5252 (5.3%)
48856	anatomical structure development	2.1249e-09	40/229 (17.4%)	281/5252 (5.3%)
48869	cellular developmental process	2.1249e-09	40/229 (17.4%)	281/5252 (5.3%)
30154	cell differentiation	1.302e-08	38/229 (16.5%)	278/5252 (5.2%)
48646	anatomical structure formation involved in morphogenesis	1.302e-08	38/229 (16.5%)	278/5252 (5.2%)
30435	sporulation resulting in formation of a cellular spore	1.302e-08	38/229 (16.5%)	278/5252 (5.2%)
9847	spore germination	9.0152e-08	12/229 (5.2%)	29/5252 (0.5%)
Cellular component
5886	plasma membrane	1.4144e-05	95/229 (41.4%)	1372/5252 (26.1%)
a p-value after FDR correction.
b The denomination represents the total number of genes with GO annotation and the numerator represents the number of each GO term genes.
c The denomination represents the number of regernce genes with GO annotation with GO annotation and the numerator represents the the number of reference genes annotated in the listed GO term.

## Sheet: S8
Table S8. Gene Ontology (GO) enrichment analysis of cluster 6
GO ID	GO description	corrected p-valulea	cluster frequencyb	total frequencyc
Biological process
30154	cell differentiation	5.2615e-06	26/147 (17.6%)	278/5252 (5.2%)
48646	anatomical structure formation involved in morphogenesis	5.2615e-06	26/147 (17.6%)	278/5252 (5.2%)
30435	sporulation resulting in formation of a cellular spore	5.2615e-06	26/147 (17.6%)	278/5252 (5.2%)
43934	sporulation	5.2615e-06	26/147 (17.6%)	281/5252 (5.3%)
9653	anatomical structure morphogenesis	5.2615e-06	26/147 (17.6%)	283/5252 (5.3%)
48856	anatomical structure development	5.2615e-06	26/147 (17.6%)	283/5252 (5.3%)
48869	cellular developmental process	5.2615e-06	26/147 (17.6%)	283/5252 (5.3%)
32502	developmental process	2.9046e-05	26/147 (17.6%)	310/5252 (5.9%)
46116	queuosine metabolic process	0.002378	4/147 (2.7%)	8/5252 (0.1%)
46118	7-methylguanosine biosynthetic process	0.002378	4/147 (2.7%)	8/5252 (0.1%)
8616	queuosine biosynthetic process	0.002378	4/147 (2.7%)	8/5252 (0.1%)
8618	7-methylguanosine metabolic process	0.002378	4/147 (2.7%)	8/5252 (0.1%)
46114	guanosine biosynthetic process	0.0089968	4/147 (2.7%)	11/5252 (0.2%)
8617	guanosine metabolic process	0.0089968	4/147 (2.7%)	11/5252 (0.2%)
9240	isopentenyl diphosphate biosynthetic process	0.029651	3/147 (2.0%)	7/5252 (0.1%)
46490	isopentenyl diphosphate metabolic process	0.029651	3/147 (2.0%)	7/5252 (0.1%)
19288	isopentenyl diphosphate biosynthetic process, mevalonate-independent pathway	0.029651	3/147 (2.0%)	7/5252 (0.1%)
46129	purine ribonucleoside biosynthetic process	0.029651	4/147 (2.7%)	16/5252 (0.3%)
42451	purine nucleoside biosynthetic process	0.029651	4/147 (2.7%)	16/5252 (0.3%)
42455	ribonucleoside biosynthetic process	0.029651	4/147 (2.7%)	16/5252 (0.3%)
9163	nucleoside biosynthetic process	0.029651	4/147 (2.7%)	16/5252 (0.3%)
a p-value after FDR correction.
b The denomination represents the total number of genes with GO annotation and the numerator represents the number of each GO term genes.
c The denomination represents the number of regernce genes with GO annotation with GO annotation and the numerator represents the the number of reference genes annotated in the listed GO term.

## Sheet: S9
Table S9. Gene Ontology (GO) enrichment analysis of cluster 7
GO ID	GO description	corrected p-valulea	cluster frequencyb	total frequencyc
Biological process
32502	developmental process	3.3091e-07	38/213 (17.8%)	310/5252 (5.9%)
9653	anatomical structure morphogenesis	6.8637e-07	34/213 (15.9%)	283/5252 (5.3%)
30154	cell differentiation	6.8637e-07	34/213 (15.9%)	278/5252 (5.2%)
30435	sporulation resulting in formation of a cellular spore	6.8637e-07	34/213 (15.9%)	278/5252 (5.2%)
43934	sporulation	6.8637e-07	34/213 (15.9%)	281/5252 (5.3%)
48646	anatomical structure formation involved in morphogenesis	6.8637e-07	34/213 (15.9%)	278/5252 (5.2%)
48856	anatomical structure development	6.8637e-07	34/213 (15.9%)	283/5252 (5.3%)
48869	cellular developmental process	6.8637e-07	34/213 (15.9%)	283/5252 (5.3%)
44042	glucan metabolic process	2.9267e-06	6/213 (2.8%)	7/5252 (0.1%)
105	histidine biosynthetic process	7.3e-06	7/213 (3.2%)	12/5252 (0.2%)
5977	glycogen metabolic process	7.3e-06	5/213 (2.3%)	5/5252 (0.0%)
6073	cellular glucan metabolic process	7.3e-06	5/213 (2.3%)	5/5252 (0.0%)
6112	energy reserve metabolic process	7.3e-06	5/213 (2.3%)	5/5252 (0.0%)
9076	histidine family amino acid biosynthetic process	7.3e-06	7/213 (3.2%)	12/5252 (0.2%)
6547	histidine metabolic process	0.00013175	7/213 (3.2%)	17/5252 (0.3%)
9075	histidine family amino acid metabolic process	0.00013175	7/213 (3.2%)	17/5252 (0.3%)
5978	glycogen biosynthetic process	0.00013705	4/213 (1.8%)	4/5252 (0.0%)
9250	glucan biosynthetic process	0.00013705	4/213 (1.8%)	4/5252 (0.0%)
15980	energy derivation by oxidation of organic compounds	0.00025942	11/213 (5.1%)	52/5252 (0.9%)
5976	polysaccharide metabolic process	0.0018183	20/213 (9.3%)	182/5252 (3.4%)
50845	teichuronic acid biosynthetic process	0.0034069	4/213 (1.8%)	7/5252 (0.1%)
50846	teichuronic acid metabolic process	0.0034069	4/213 (1.8%)	7/5252 (0.1%)
5975	carbohydrate metabolic process	0.0085114	31/213 (14.5%)	395/5252 (7.5%)
9114	hypoxanthine catabolic process	0.020007	3/213 (1.4%)	5/5252 (0.0%)
9056	catabolic process	0.022042	27/213 (12.6%)	347/5252 (6.6%)
270	peptidoglycan metabolic process	0.028143	11/213 (5.1%)	91/5252 (1.7%)
6022	aminoglycan metabolic process	0.028143	11/213 (5.1%)	91/5252 (1.7%)
19541	propionate metabolic process	0.028143	3/213 (1.4%)	6/5252 (0.1%)
30203	glycosaminoglycan metabolic process	0.028143	11/213 (5.1%)	91/5252 (1.7%)
46100	hypoxanthine metabolic process	0.028143	3/213 (1.4%)	6/5252 (0.1%)
Molecular function
16757	transferase activity, transferring glycosyl groups	0.0029531	14/213 (6.5%)	104/5252 (1.9%)
3824	catalytic activity	0.0052782	132/213 (61.9%)	2603/5252 (49.5%)
8410	CoA-transferase activity	0.0060697	4/213 (1.8%)	8/5252 (0.1%)
4556	alpha-amylase activity	0.020007	3/213 (1.4%)	5/5252 (0.0%)
16160	amylase activity	0.020007	3/213 (1.4%)	5/5252 (0.0%)
16782	transferase activity, transferring sulfur-containing groups	0.023086	5/213 (2.3%)	19/5252 (0.3%)
16726	oxidoreductase activity, acting on CH or CH2 groups, NAD or NADP as acceptor	0.028143	3/213 (1.4%)	6/5252 (0.1%)
19899	enzyme binding	0.028143	3/213 (1.4%)	6/5252 (0.1%)
Cellular component
43591	endospore external encapsulating structure	0.028143	3/213 (1.4%)	6/5252 (0.1%)
44426	cell wall part	0.028143	3/213 (1.4%)	6/5252 (0.1%)
a p-value after FDR correction.
b The denomination represents the total number of genes with GO annotation and the numerator represents the number of each GO term genes.
c The denomination represents the number of regernce genes with GO annotation with GO annotation and the numerator represents the the number of reference genes annotated in the listed GO term.

## Sheet: S10
Table S10. Gene Ontology (GO) enrichment analysis of cluster 8
GO ID	GO description	corrected p-valulea	cluster frequencyb	total frequencyc
Biological process
30154	cell differentiation	5.3697e-09	39/227 (17.1%)	278/5252 (5.2%)
48646	anatomical structure formation involved in morphogenesis	5.3697e-09	39/227 (17.1%)	278/5252 (5.2%)
30435	sporulation resulting in formation of a cellular spore	5.3697e-09	39/227 (17.1%)	278/5252 (5.2%)
43934	sporulation	5.3697e-09	39/227 (17.1%)	281/5252 (5.3%)
9653	anatomical structure morphogenesis	5.3697e-09	39/227 (17.1%)	281/5252 (5.3%)
48856	anatomical structure development	5.3697e-09	39/227 (17.1%)	281/5252 (5.3%)
48869	cellular developmental process	5.3697e-09	39/227 (17.1%)	281/5252 (5.3%)
32502	developmental process	2.038e-08	40/227 (17.6%)	310/5252 (5.9%)
45150	acetoin catabolic process	0.00069283	5/227 (2.2%)	8/5252 (0.1%)
42182	ketone catabolic process	0.00069283	5/227 (2.2%)	8/5252 (0.1%)
45149	acetoin metabolic process	0.0056621	5/227 (2.2%)	12/5252 (0.2%)
31460	glycine betaine transport	0.0056621	5/227 (2.2%)	12/5252 (0.2%)
15695	organic cation transport	0.0056621	5/227 (2.2%)	12/5252 (0.2%)
15697	quaternary ammonium group transport	0.0056621	5/227 (2.2%)	12/5252 (0.2%)
15838	betaine transport	0.0056621	5/227 (2.2%)	12/5252 (0.2%)
a p-value after FDR correction.
b The denomination represents the total number of genes with GO annotation and the numerator represents the number of each GO term genes.
c The denomination represents the number of regernce genes with GO annotation with GO annotation and the numerator represents the the number of reference genes annotated in the listed GO term.

[truncated: 3 more sheets: S11, S12, S13]
