# Supplementary material for: Time-Course Transcriptome Analysis of Bacillus subtilis DB104 during Growth
Source: Microorganisms. 2023 Jul 28;11(8):1928. doi: 10.3390/microorganisms11081928 (PMC10458515; doi:10.3390/microorganisms11081928)
Supplement: Supplementary file 1 [file microorganisms-11-01928-s001.zip › supplementary File S3.xlsx]

## Sheet: cluster 1
Table S1. List of the differentially expressed genes in cluster 1
Gene_ID	Gene_Symbol	Description	fold change					Transcripts per millions mapped reads (TPM)
			10H/8H	12H/10H	15H/12H	18H/15H	24H/18H	8H	10H	12H	15H	18H	24H
gene-BSU_00740	pabB	4-amino-4-deoxychorismate synthase (para-aminobenzoate synthase)	-2.07594	1.10753	1.6974	-1.37174	1.34174	28.4365	16.822	11.9695	13.2164	4.02119	16.8555
gene-BSU_00750	pabA	4-amino-4-deoxychorismate synthase; anthranilate synthase (subunit II)	-1.31702	-1.42422	2.00988	-1.49412	1.16476	94.358	71.4999	34.4093	46.3257	14.9769	55.8018
gene-BSU_01710	ybbJ	putative acyltransferase	-1.43154	-1.76681	2.50323	-1.14007	-1.62724	20.187	17.0416	4.94095	8.46732	5.11862	11.0344
gene-BSU_02550	ycbL	two-component response regulator [YcbM]	-1.23649	-1.32764	2.33113	-1.55821	1.1318	1.61651	3.08337	1.21891	0.651194	0.318455	2.69025
gene-BSU_02850	znuA	Zn(II)-binding lipoprotein	-2.98586	2.13791	1.94483	-1.33268	1.56475	24.3267	5.86186	10.0517	18.5803	6.86748	16.7419
gene-BSU_02860	znuC	Zn(II) transporter (ATP-binding protein)	-2.09716	1.21746	2.26877	-1.2099	1.20167	12.5404	6.51654	4.77057	7.29194	3.67678	8.61471
gene-BSU_02870	znuB	high affinity Zn(II) ABC transporter (permease)	-2.28753	1.05018	2.24763	-1.25143	1.22199	23.8787	13.052	9.35439	13.2098	6.17417	18.0776
gene-BSU_03150	aroK	shikimate kinase	-2.26746	1.55534	1.84423	-1.10405	-1.06899	11.7737	7.03667	7.76812	8.34403	5.7986	8.6096
gene-BSU_03280	nasF	uroporphyrin-III C-methyltransferase	-1.72679	-1.55306	2.26304	-1.05255	-1.01841	103.651	77.1652	34.3008	44.7264	30.5288	63.6611
gene-BSU_03330	nasA	putative nitrate transporter	-1.72532	-1.13146	2.47929	-1.76798	1.49213	12.6489	7.86979	3.95767	8.008	2.6614	7.04321
gene-BSU_03660	yclE	putative hydrolase	-1.20693	-1.23744	2.44566	-1.48054	1.06268	18.3102	25.2171	10.9156	21.4335	10.9716	14.7652
gene-BSU_03990	mtlD	mannitol-1-phosphate 5-dehydrogenase	-2.23638	-1.51732	2.25937	-1.04531	-1.05372	27.2618	9.73156	4.25397	5.13817	3.32453	6.4572
gene-BSU_04000	ycsA	putative tartrate dehydrogenase	-2.79242	-1.26938	4.66404	1.27696	-1.80209	172.325	117.903	40.6271	89.4792	180.744	156.151
gene-BSU_04450	dctS	two-component sensor histidine kinase	-1.55212	-2.03219	2.11552	1.27832	-1.2039	7.43285	5.43225	2.45204	1.287	2.56249	4.97168
gene-BSU_05420	ydfI	two-component response regulator [YdfH]	-2.4646	1.35644	-1.04346	1.83873	1.01368	8.69603	1.83158	4.20211	2.45601	2.16192	3.63196
gene-BSU_05630	dinB	nuclease inhibitor	-1.05824	-1.88838	2.09983	-1.27904	1.33887	93.3278	63.2764	33.587	47.9445	16.5471	39.6321
gene-BSU_06150	gutB	glucitol (sorbitol) dehydrogenase	-2.70091	1.08197	1.58005	-1.02169	1.06401	19.9911	5.29886	5.08052	3.2478	3.14479	5.41056
gene-BSU_07420	ettM	putative energy-sensing inhibitor of translation	-1.66876	1.31014	2.29521	-1.5733	1.30794	47.3204	41.3751	31.921	41.4886	18.7757	54.5543
gene-BSU_07860	yfkL	efflux transporter	-2.44432	1.48826	1.0691	1.2675	1.24455	12.4781	7.40474	6.88248	2.31682	3.71461	16.3614
gene-BSU_07910	yfkF	putative efflux transporter	-1.48213	1.09051	2.03255	-1.18614	1.19133	36.5744	39.2815	24.2636	24.9301	17.9617	60.7572
gene-BSU_08180	malA	6-phospho-alpha-glucosidase	-2.52407	1.03105	2.28716	2.39259	1.16415	695.745	218.874	150.029	214.395	366.137	354.26
gene-BSU_08190	malR	transcriptional activator of the Mal operon	-2.73124	1.00075	1.89549	2.61682	1.0851	611.991	148	106.066	143.055	232.346	242.751
gene-BSU_08200	malP	phosphotransferase system (PTS) maltose-specific enzyme IICB component	-2.92387	-1.10918	1.90954	2.73851	1.07374	601.552	158.596	100.812	126.295	254.518	212.5
gene-BSU_08450	sxzZ	xenosiderophore schizokinen (dihydroxamate) transporter (permease)	-2.14924	1.0113	2.15996	-1.79992	1.22542	37.7463	35.0381	19.9857	21.4896	10.6486	28.9221
gene-BSU_08460	sxzA	xenosiderophore schizokinen (dihydroxamate) transporter (permease)	-2.90114	-1.20036	2.37493	-1.69044	1.18957	58.0594	41.4257	13.3722	22.6315	11.3057	30.5021
gene-BSU_09280	glpF	glycerol permease	-1.00172	-1.4186	2.42785	-1.28194	1.42289	343.215	432.782	273.926	390.546	123.97	401.439
gene-BSU_09430	citR	transcriptional regulator CitR (LysR family)	-2.04041	2.08349	-1.22148	1.17965	1.6616	4.48811	2.397	3.07963	2.53118	1.1388	5.32355
gene-BSU_09440	citA	citrate synthase I	-2.11137	-1.60485	1.45882	1.58848	-1.10957	19.3544	5.72145	3.8639	1.87965	4.41221	6.27781
gene-BSU_09480	yhdI	putative PLP-dependent transcriptional regulator	-2.69147	1.0832	1.7797	-1.3757	1.48298	15.8936	6.96946	5.29838	7.51337	4.12203	6.79198
gene-BSU_09620	yhdW	putative glycerophosphodiester phosphodiesterase	-1.37047	-1.35122	2.4034	1.60917	-1.31277	62.1964	53.5844	31.3264	39.7825	72.6448	70.1927
gene-BSU_09660	yheN	putative polysaccharide deacetylase	-2.37078	-1.19425	2.79052	-1.52504	-1.08626	104.194	48.5742	30.0647	28.0901	15.0709	96.1249
gene-BSU_10010	trpP	tryptophan transporter or sensor	-1.76366	-1.51055	2.68123	-1.38376	1.35178	450.731	237.893	120.953	232.697	81.2314	263.626
gene-BSU_10070	sndC	N-acetyl amino acid acetylase, promiscuous activity	-1.16445	-1.64954	2.24511	1.36466	-1.10171	425.575	263.186	153.157	266.061	324.664	285.906
gene-BSU_10440	yhjA	conserved hypothetical protein	-2.12472	-1.13152	2.77889	-1.15607	-1.46794	96.9791	42.6176	39.5825	29.0167	14.9398	76.1817
gene-BSU_11010	samT	bifunctional homocysteine S-methyltransferase using (R,S)AdoMet and methylenetetrahydrofolate reductase [NAD(P)H]	1.0354	-2.17476	2.0655	-1.08569	-1.13908	35.9166	30.9656	15.6853	15.8351	12.0993	18.2038
gene-BSU_11180	yitZ	putative transport protein	-2.30954	1.00515	2.22287	1.28314	-1.17197	32.5646	25.1124	14.8827	17.2209	24.2717	34.4879
gene-BSU_11930	yjcO	putative DNA binding protein; phage island	-1.67675	-2.02094	1.43781	1.78357	-1.18418	23.3172	15.8165	5.16554	3.73286	5.53905	7.93101
gene-BSU_12280	yjlC	conserved hypothetical protein	-1.75631	-2.15879	1.79042	1.13307	1.37992	311.552	295.854	50.0402	54.9815	36.0934	261.442
gene-BSU_12290	ndh	NADH dehydrogenase	-2.83752	-2.1228	3.31045	-1.28922	-1.11887	463.92	556.662	95.5753	123.665	65.2995	360.931
gene-BSU_12649	ykzM	phage PBSX; conserved hypothetical protein	-1.84471	-3.27408	2.9731	1.07028	2.06273	6.82193	3.45168	0.947579	1.34996	0.198053	6.84457
gene-BSU_12720	xkdS	phage PBSX; conserved hypothetical protein	-2.2748	-1.49084	2.01601	1.12492	2.00887	3.50705	2.16878	1.21784	0.809662	0.712711	3.3232
gene-BSU_13090	gdnC	guanidinium efflux transporter subunit	-1.48579	-1.05727	2.14449	-1.68304	1.78097	4.40709	5.6985	2.44861	3.92445	1.66329	4.66736
gene-BSU_13100	gdnD	guanidinium efflux transporter subunit	-1.59792	-1.12159	2.71784	-1.58147	1.47821	3.95631	10.5649	4.56804	9.14198	2.86429	8.6418
gene-BSU_13110	purU	formyltetrahydrofolate hydrolase	-2.06827	1.25265	1.57577	-1.09262	1.11906	51.0279	41.8559	35.0462	24.555	19.2131	64.3703
gene-BSU_13480	htpK	regulator of quality control	-2.09745	1.4148	1.08669	1.00473	1.35076	30.243	20.579	14.6328	9.40552	5.12821	31.3173
gene-BSU_14510	ktrC	potassium uptake protein	-2.38544	1.30245	1.42235	-1.02791	1.1424	152.659	80.5859	57.177	39.3598	29.5018	121.037
gene-BSU_18060	yneR	conserved hypothetical protein	-1.27346	-1.3223	2.11801	1.3297	-1.16918	23.4803	16.3316	10.0878	16.7667	21.0844	16.4816
gene-BSU_18960	yozM	putative bacteriophage protein; putative defective prophage 6	1.08775	-1.61198	1.63826	1.68067	-2.02771	28.5508	40.9956	20.999	12.3184	8.90707	29.9891
gene-BSU_19340	yocR	putative sodium-dependent transporter	-2.31507	-1.14857	1.47232	1.01128	1.47104	19.2759	9.60434	7.28956	4.7506	3.66309	12.6967
gene-BSU_19579	yoyD	putative exported protein	-1.67885	-1.79825	2.67692	-1.58921	3.31377	9.78006	6.68584	2.06487	8.08971	0.647367	14.915
gene-BSU_21870	ilvD	dihydroxy-acid dehydratase	-2.07597	-1.27321	1.66723	1.13106	-1.05221	226.002	127.564	74.4324	41.4581	68.1511	183.435
gene-BSU_22670	trpD	anthranilate phosphoribosyltransferase	-1.31357	-1.15047	2.62973	-1.25999	-1.19505	18.7108	15.5263	8.67216	18.7017	12.5387	12.7738
gene-BSU_23070	serA	3-phosphoglycerate dehydrogenase	-2.79844	-1.52879	1.87414	1.95276	1.04591	123.728	63.4456	21.3043	25.6673	52.3066	84.9643
gene-BSU_24940	yqzC	conserved protein of unknown function	-2.30066	1.71829	1.59836	1.08023	-1.52281	88.2704	50.7558	35.256	47.0484	49.25	65.725
gene-BSU_24950	pstBB	phosphate ABC transporter (ATP-binding protein)	-3.12443	1.24364	1.32115	-1.33106	1.68768	21.4906	6.22155	3.04786	4.09041	1.27406	4.04147
gene-BSU_27200	yrhG	putative formate/nitrite transporter	-3.51929	-1.57337	3.28746	1.18727	1.30808	7.46068	7.75946	2.07261	2.70667	3.08651	16.8423
gene-BSU_27240	yrhC	conserved protein of unknown function	-4.38477	-1.07485	3.36493	1.0112	1.20744	10.5523	2.90878	3.59342	15.998	12.0169	13.3385
gene-BSU_28460	yslB	conserved protein of unknown function	-1.22282	-1.34916	2.21163	-1.42869	1.28089	67.3735	47.1627	37.14	57.8718	21.6383	59.243
gene-BSU_28690	glcF	glycolate oxidase (iron-sulfur subunit)	-1.38977	1.06075	2.02093	-1.12387	-1.03188	43.9395	33.5334	26.1148	33.8088	31.6773	31.3141
gene-BSU_28810	abnA	arabinan-endo-1,5-alpha-L-arabinase	-1.50194	-1.88148	2.02662	1.10111	1.01381	441.777	313.583	163.753	92.1094	60.1072	201.763
gene-BSU_28930	lytS	two-component sensor histidine kinase [LytT]	-1.44882	-1.1061	2.0126	1.20062	-1.12585	19.0622	16.7793	8.67577	13.0788	12.681	20.4217
gene-BSU_28940	ysaA	promiscuous phosphatase	-2.03299	1.01604	3.09288	-1.76413	1.36153	110.968	71.9769	47.5732	91.5622	31.1315	109.12
gene-BSU_29600	braB	branched-chain amino acid-Na+ symporter	-3.26695	1.48788	1.36489	-1.45949	1.71163	9.81427	3.32699	6.35898	1.91497	0.842834	6.09941
gene-BSU_29720	motS	sodium channel stator-force generator peptidoglycan binding subunit of flagellar rotation	-2.00795	-1.35944	1.88856	1.19813	-1.02493	3.77518	2.76513	1.56565	1.21663	1.48743	3.08428
gene-BSU_29730	motP	sodium channel stator-force generator subunit of flagellar rotation	-2.15695	1.00064	1.99989	-1.88317	1.53126	20.066	9.02466	7.60146	5.83584	1.58878	8.74444
gene-BSU_29750	aroX	bifunctional chorismate mutase type II-isozyme 3 (regulatory domain); 3-deoxy-D-arabino-heptulosonate 7-phosphate synthase	-2.01415	-1.10683	1.56467	1.29515	1.51334	214.065	117.759	76.3025	44.2411	51.1864	273.487
gene-BSU_30350	yttB	putative efflux transporter	-1.81636	1.00007	2.49479	-1.11266	-1.24192	14.62	12.8026	8.95081	7.63453	6.21179	17.8547
gene-BSU_30560	pckA	phosphoenolpyruvate carboxykinase	-4.16245	1.12653	4.50886	1.85488	1.43292	711.855	405.002	209.878	670.079	864.158	2115.38
gene-BSU_31510	yufK	putative integral membrane protein	-2.83943	1.12137	1.91282	-1.26636	1.05989	34.3837	14.45	13.5743	11.5678	5.75205	23.5798
gene-BSU_33670	rghRB	putative phage-like transcriptional repressor	-1.01232	-2.00405	1.97086	1.01705	1.1484	24.1512	23.9974	11.3642	10.0894	7.53874	15.4655
gene-BSU_33950	cggR	transcriptional regulator of gapA	-1.72684	-1.06665	2.08427	-1.59495	1.01073	159.723	88.6707	74.4475	125.279	67.1591	61.0525
gene-BSU_34050	lutA	iron-sulfur oxidase subunit used in L-lactate utilization	-1.8422	-1.68781	2.23631	-1.1123	-1.03265	1068.93	721.127	323.87	211.87	127.096	726.6
gene-BSU_34800	cwlO	secreted cell wall DL-endopeptidase	-4.94423	2.19094	1.72673	1.2743	-1.13685	274.99	97.2215	54.1419	33.4382	58.6245	382.353
gene-BSU_34940	yvpB	putative hydratase	-2.04403	1.13166	1.71376	1.22853	1.28264	5.01238	2.677	2.75591	2.22484	2.07364	4.75544
gene-BSU_35010	nagA	N-acetylglucosamine-6-phosphate deacetylase	-1.37514	-1.42067	4.47285	-1.88737	-1.63095	48.2618	33.9208	18.0338	36.614	13.4746	18.1095
gene-BSU_35020	nagBA	glucosamine-6-phosphate isomerase	-1.58009	-1.53644	4.52895	-1.94385	-1.75463	75.5037	50.118	27.6124	50.22	13.4464	19.1911
gene-BSU_35030	nagR	transcriptional regulator (GntR family)	-1.65548	-1.65361	4.35714	-2.08934	-1.56988	68.1045	40.7333	16.8681	38.5708	9.59907	15.5857
gene-BSU_35090	pchE	pulcherriminic acid efflux transporter	-1.45136	-1.15856	2.18557	1.03227	-1.114	12.5214	11.2958	6.16395	8.33425	7.22893	7.97027
gene-BSU_35250	ftsX	cell-division ABC transporter	-4.96196	2.27203	1.94124	-1.459	-1.08428	72.4541	28.9396	16.5364	12.9959	13.8737	70.0038
gene-BSU_35260	ftsE	cell-division signal transducer (ATP-binding protein)	-3.86024	2.40374	1.54388	-1.20225	1.25473	22.8913	6.96868	10.2703	5.02061	5.55586	40.0014
gene-BSU_35780	lytD	exported N-acetylglucosaminidase (major autolysin) (CWBP90)	-4.52296	-1.28999	2.7245	2.97936	-1.22565	162.619	35.6238	16.5278	36.671	84.1214	92.8225
gene-BSU_35840	tagT	teichoic acid-peptidoglycan tethering enzyme (LCP component) with transcription regulator domain of capsule synthesis	-2.02188	1.02498	1.25402	1.22603	1.05702	36.1105	15.602	15.4194	6.40711	5.72943	28.2742
gene-BSU_36250	ptkA	maintenance protein tyrosine kinase involved in biofilm formation	-1.60418	-1.05596	2.02084	-1.04858	-1.50342	27.0916	22.5858	13.079	5.31383	7.53266	35.5729
gene-BSU_36610	ywnC	putative integral inner membrane protein	-2.54699	1.9684	1.89662	-1.3259	1.19339	8.39557	4.1558	5.94458	5.26099	3.72742	9.10827
gene-BSU_37150	pyrG	CTP synthetase	-2.37405	1.66541	2.68943	-1.45524	-1.15434	92.4216	63.5677	61.7526	87.2095	22.4151	101.194
gene-BSU_37760	rocC	basic aminoacid permease	-2.6935	-1.35252	1.74717	1.71235	1.77462	237.231	53.7352	29.2261	27.5138	30.8803	308.821
gene-BSU_37770	rocB	putative N-deacylase involved in arginine and ornithine utilization	-3.43682	-1.84562	1.82519	2.62479	2.32503	151.994	29.577	10.3699	5.93834	7.62416	229.069
gene-BSU_37780	rocA	delta-1-pyrroline-5 carboxylate dehydrogenase	-5.94488	-1.59756	2.47968	1.90088	2.33218	381.831	44.8711	17.5614	9.4855	12.6926	449.301
gene-BSU_37790	rocG	glutamate dehydrogenase	-4.53338	-2.43755	3.03396	2.1604	2.07719	146.717	30.6978	5.778	3.74867	6.6336	203.192
gene-BSU_37940	ywdJ	putative purine/pyrimidine permease	-2.07653	-1.06326	2.06445	1.02727	-1.31605	59.8504	45.2014	26.7439	23.054	29.178	38.8997
gene-BSU_38020	pdxK	pyridoxine, pyridoxal, and pyridoxamine kinase	-2.0932	1.29946	1.05462	1.23684	1.18829	56.0829	33.864	35.731	17.2699	17.2219	47.5569
gene-BSU_38050	sacP	phosphotransferase system (PTS) sucrose-specific enzyme IIBC component	-1.44855	-1.65539	2.03158	-1.05978	1.08815	14.3534	12.7865	5.2404	5.226	2.59741	8.05117
gene-BSU_38420	sacY	transcriptional antiterminator	-1.26616	-1.25893	1.05268	2.04814	-1.32067	20.9871	13.4505	7.01579	5.55279	4.42482	14.1262
gene-BSU_38500	dltA	D-alanine:D-alanyl-carrier protein ligase subunit	-3.51224	-1.09568	3.57428	-1.24295	-1.59631	270.738	136.93	52.7721	51.4245	70.5394	200.423
gene-BSU_38510	dltB	putative D-alanine transferase from DCP to undecaprenylphosphate for lipoteichoic acid and wall teichoic acid	-3.58712	-1.17441	3.23515	-1.1255	-1.69296	304.797	135.672	42.4472	45.3749	47.2436	190.034
gene-BSU_38520	dltC	D-alanyl carrier protein	-2.77394	-1.33135	2.85262	-1.04718	-1.66056	100.861	44.299	17.0744	12.8902	16.288	65.7069
gene-BSU_38530	dltD	putative D-alanine from undecaprenylphosphate to the polyglycerolphosphate chain for lipoteichoic acid and wall teichoic acid synthesis	-3.31054	-1.25377	3.47547	-1.27113	-1.63514	350.208	172.684	47.9636	52.1156	57.1324	227.012
gene-BSU_38540	dltE	putative oxidoreductase	-3.29938	1.06678	2.86375	-1.32034	-1.36864	360.214	176.945	78.3326	91.3414	70.3463	252.899
gene-BSU_38550	ilvK	branched-chain amino acid aminotransferase	-1.76495	-1.06272	2.05384	1.20024	1.24851	183.186	107.142	78.2	67.2775	55.6071	226.568
gene-BSU_38590	licB	phosphotransferase system (PTS) lichenan-specific enzyme IIB component	-1.25509	-1.52781	3.50441	1.00886	-1.91936	134.615	86.709	42.9814	84.6742	68.0782	73.5736
gene-BSU_38640	yxlH	putative transporter	-2.09931	1.08147	1.99265	-1.543	1.42678	53.9245	34.9788	24.1503	28.958	9.48233	38.4881
gene-BSU_38840	gdnE	guanidinium exporter	-2.89462	-1.48624	3.11867	2.58396	-2.14838	13.528	6.02085	2.60329	3.53216	9.94949	9.35233
gene-BSU_38890	yxjN	putative integral inner membrane protein of unknown function	-2.33261	1.1875	1.62045	-1.54024	1.33079	12.6076	4.6071	6.12928	4.67788	2.56215	4.39217
gene-BSU_39090	yxiP	putative lipoprotein	-1.01325	-1.37228	1.42503	-1.06679	2.09156	10.8537	11.3468	5.9422	4.92013	2.99348	13.0844
gene-BSU_39240	yxxF	putative transporter	-1.88814	-1.35809	2.32219	-1.36511	1.37502	46.2885	30.2403	19.5104	25.5318	9.17517	37.1003
gene-BSU_39450	yxeR	putative ethanolamine permease	-3.36177	1.23671	1.75237	-1.35807	1.36704	19.4283	14.4135	18.0857	15.9376	11.1454	19.0045
gene-BSU_39660	tpeJ	two-component response regulator [TpeK(YxdK)]	-2.36678	-1.14748	1.67378	1.09845	1.31807	47.293	11.6857	9.77448	6.06995	8.48613	17.1379
gene-BSU_39830	yxcA	conserved protein of unknown function	-1.64168	-1.57829	2.41502	1.1752	-1.07446	32.1391	14.9984	11.5289	10.1676	8.08951	25.7758
gene-BSU_40420	purA	adenylosuccinate synthetase	-1.8334	-1.20027	2.11843	1.51371	-1.20605	190.528	152.522	98.7043	115.201	31.767	271.724
gene-BSU_40660	yybF	putative permease	-2.52873	1.64059	1.29203	1.14358	1.23194	7.83081	3.11077	5.89254	5.71818	4.96208	8.08767
gene-BSU_22660	trpC	indole-3-glycerol phosphate synthase	-1.15312	-1.2213	2.33479	-1.39328	1.16988	14.6779	11.5347	7.7474	12.5484	5.78314	11.4365

## Sheet: cluster 2
Table S2. List of the differentially expressed genes in cluster 2
Gene_ID	Gene_Symbol	Description	fold change					Transcripts per millions mapped reads (TPM)
			10H/8H	12H/10H	15H/12H	18H/15H	24H/18H	8H	10H	12H	15H	18H	24H
gene-BSU_00100	dacA	D-alanyl-D-alanine carboxypeptidase (penicillin-binding protein 5)	-2.22553	1.12227	1.27554	1.19805	-1.28422	97.1089	59.2098	26.4853	10.3208	11.2993	67.8958
gene-BSU_00370	abrB	transcriptional regulator for transition state genes (AbrB-SurF)	-2.16512	1.22893	1.1693	-2.35149	1.60852	129.972	64.6528	72.3823	45.0406	10.7316	86.9958
gene-BSU_01620	feuB	ferri-bacillibactin permease	-2.22756	1.07094	1.6729	-1.57609	-1.23518	15.5699	9.77804	3.92326	5.34411	3.27999	6.6289
gene-BSU_01630	feuA	ferri-bacillibactin-binding lipoprotein	-2.11243	1.08844	1.24129	-1.50127	-1.19761	25.9633	17.168	5.8732	6.40455	3.36441	8.46722
gene-BSU_02230	purT	phosphoribosylglycinamide formyltransferase 2	-3.8477	-1.19154	2.80279	-1.41327	-1.48962	125.879	60.1389	18.4163	11.3905	8.90003	56.5985
gene-BSU_02400	ybgF	putative aminoacid permease	-2.28503	-1.00762	1.2144	-1.35258	1.0656	8.51426	5.58751	4.33251	2.71999	1.71898	2.23954
gene-BSU_02560	ycbM	two-component sensor histidine kinase [YcbL]	-2.39216	1.43032	-1.18837	1.3798	1.00141	8.1488	5.11483	2.54966	0.947571	1.57553	7.11757
gene-BSU_03210	putC	1-pyrroline-5-carboxylate dehydrogenase	-4.08336	-1.03581	1.28512	-1.59619	-1.00789	4301.33	1076.58	644.343	500.09	180.107	679.922
gene-BSU_03900	gabT	4-aminobutyrate aminotransferase	-39.0792	5.40746	2.28704	-6.25927	4.5316	788.356	11.3397	33.0829	150.377	10.1238	26.7422
gene-BSU_03910	gabD	succinate-semialdehyde dehydrogenase	-10.1704	1.61628	1.97776	-3.14154	2.1489	1825.51	108.602	116.907	324.447	40.407	88.4915
gene-BSU_03982	mtlF	phosphotransferase system (PTS) mannitol-specific enzyme IIA component	-3.04717	-1.69256	1.62907	1.00115	1.11212	10.739	2.72193	0.720555	1.1406	0.903616	1.15661
gene-BSU_04010	sipU	type I signal peptidase	-4.98583	1.32636	1.29771	1.00917	-1.16422	7.24973	2.2338	2.20766	0.961012	0.692131	3.24834
gene-BSU_05680	ydgK	putative efflux transporter	-2.56701	1.05042	1.5728	-1.58265	1.29212	11.3167	6.8082	4.37697	2.93441	1.21977	4.7527
gene-BSU_06090	bsuRA	type-2 restriction enzyme BsuMI component BsuRA (YdiR); prophage region 3	-2.56735	-1.69052	1.49395	1.27721	-1.10539	43.6564	16.495	6.60891	3.4523	2.53243	16.5313
gene-BSU_06100	bsuRB	type-2 restriction enzyme BsuMI component BsuRB (YdiS); prophage region 3	-2.16349	1.05335	-1.23223	1.08556	-1.21655	42.9731	19.2886	13.8749	4.72684	2.77389	12.1847
gene-BSU_06110	bsuRC	type-2 restriction enzyme BsuMI component BsuRC (YdjA); prophage region 3	-2.18895	1.02589	-1.62225	1.5329	1.0086	64.6265	25.3535	14.9183	5.78032	3.19562	19.8956
gene-BSU_06340	yeaD	conserved hypothetical protein	-2.29831	-1.62438	2.2402	-1.20272	-1.29966	36.3926	19.7873	8.58164	5.59835	5.07293	18.4361
gene-BSU_06350	yebA	conserved hypothetical protein	-2.41355	-1.344	1.61343	-1.1256	1.07978	48.9761	24.6965	10.9196	9.23604	5.83799	22.1542
gene-BSU_06370	pbuG	hypoxanthine/guanine permease	-10.2482	2.41979	1.96696	-2.38808	2.0113	100.92	8.76095	20.1559	37.0949	8.06492	16.8062
gene-BSU_06440	purB	adenylosuccinate lyase	-3.45705	1.77478	-1.54562	1.47161	-1.28497	199.613	42.5787	39.2302	24.2186	8.36681	35.2765
gene-BSU_06450	purC	phosphoribosylaminoimidazole succinocarboxamide synthetase	-4.12379	1.33405	-2.46566	2.98707	-1.59869	207.843	31.9304	24.5822	6.85488	5.2574	33.0349
gene-BSU_06460	purS	factor required for phosphoribosylformylglycinamidine synthetase activity	-4.60812	1.29268	-2.05075	2.78033	-2.23353	129.819	19.4332	17.9037	5.21722	2.55139	14.0425
gene-BSU_06470	purQ	phosphoribosylformylglycinamidine synthetase subunit I	-3.88393	1.30928	-1.44387	1.91982	-1.68396	148.527	29.3477	18.6586	7.49191	3.61446	25.4453
gene-BSU_06480	purL	phosphoribosylformylglycinamidine synthetase subunit II	-4.40473	1.10594	-1.31014	2.13487	-1.77763	245.208	43.7853	31.654	11.8708	8.95102	43.9354
gene-BSU_06490	purF	glutamine phosphoribosylpyrophosphate amidotransferase	-4.53111	-1.05297	-1.16477	1.9061	-1.70605	370.959	72.7804	44.8103	17.2165	12.0937	57.3211
gene-BSU_06500	purM	phosphoribosylaminoimidazole synthetase	-4.65148	-1.18706	-1.29829	2.40973	-1.83566	271.85	43.5688	31.7958	10.3659	6.87477	43.3577
gene-BSU_06510	purN	phosphoribosylglycinamide formyltransferase	-4.75271	-1.37566	-1.27368	2.76843	-1.79532	301.154	42.5668	23.1166	8.71508	8.70422	44.6119
gene-BSU_06520	purH	fused phosphoribosylaminoimidazole carboxy formyl formyltransferase; inosine-monophosphate cyclohydrolase	-4.63087	-1.22388	-1.22274	2.37348	-1.83473	331.03	57.9586	32.4966	12.6146	9.63857	50.2684
gene-BSU_06530	purD	phosphoribosylglycinamide synthetase	-4.53659	-1.28861	1.07895	1.70014	-1.75445	247.048	47.522	26.9007	10.0955	8.06632	36.2895
gene-BSU_07610	citM	transporter of divalent metal ions/citrate complexes	-10.3865	-1.57913	1.86844	-1.05694	1.01359	129.543	15.1596	5.81757	5.37394	5.06358	8.37872
gene-BSU_07650	yflK	putative sulfur carrier	-1.97014	-1.44365	2.18911	-1.3076	-1.26078	103.78	91.0532	41.909	25.2287	17.9746	61.3939
gene-BSU_08030	dusC	tRNA-dihydrouridine synthase 2	-2.06139	-1.14304	-1.11925	1.38107	-1.08059	63.6772	32.3769	26.9479	6.44891	9.44639	25.6298
gene-BSU_08440	sxzY	xenosiderophore schizokinen (dihydroxamate) transporter binding lipoprotein	-2.40167	-1.1208	1.73902	-1.56522	-1.6668	119.716	102.799	34.1623	26.8537	14.5022	45.7249
gene-BSU_09130	tcyP	(sodium)-cystine symporter	-3.57765	-1.06377	1.4785	-1.60774	1.30465	24.064	14.8432	9.98838	8.03529	3.70794	10.23
gene-BSU_09470	yhdH	putative sodium-dependent transporter	-2.5882	-1.1808	1.58937	-1.12232	-1.05277	22.8473	9.78655	7.19279	2.907	2.5909	10.9929
gene-BSU_09950	prsA	molecular chaperone lipoprotein	-2.25892	1.2703	1.18924	1.0899	-1.04003	233.748	111.606	112.849	29.9902	31.1855	197.815
gene-BSU_10850	iolX	scyllo-inositol 2-dehydrogenase (NAD(+))	-7.93421	-1.45838	1.49188	-2.53016	1.44341	154.894	24.8136	17.8479	12.4501	3.58285	7.04079
gene-BSU_11570	cwlQ	bifunctional muramidase and murein lytic transglycosylase	-3.69001	-1.49662	1.51177	-1.90503	1.66947	143.294	57.8399	24.3247	21.6588	6.99061	19.5225
gene-BSU_11820	yjcD	putative ATP-dependent DNA helicase (sporulation associated)	-2.03857	-1.0347	1.16367	1.00152	-1.38173	12.4845	9.83578	5.59757	2.20435	2.07356	8.14494
gene-BSU_12470	yjqA	phage PBSX; conserved hypothetical protein	-2.0806	-1.33878	1.69102	1.01782	-1.50039	71.975	51.9944	24.4302	14.5996	11.1303	41.6378
gene-BSU_12480	pghB	phage PBSX; gamma-polyglutamate hydrolase	-2.56236	-1.06992	2.17078	-1.29673	-1.32673	30.3834	20.4754	9.63607	6.12857	5.39472	24.9965
gene-BSU_12860	steT	serine / threonine exchanger	-2.09095	1.15228	1.52318	-1.89804	1.25585	7.58255	5.03818	3.1514	3.59171	1.51495	6.2599
gene-BSU_13300	mgtE	magnesium transporter	-2.305	-1.20626	1.86168	-1.40398	1.08114	128.617	63.2409	26.3991	46.0033	27.3164	25.5477
gene-BSU_13420	dgcW	diguanylate cyclase	-3.37973	1.60346	-1.09389	-1.37702	1.49728	27.5195	6.67593	7.94499	7.03324	2.40062	3.32686
gene-BSU_13860	papB	Xaa-Pro Xaa-Pro-Xaa di-tri-peptidase used in osmoprotection	-2.13638	-1.26984	1.89615	-1.07355	-1.40767	177.569	126.294	61.7618	26.532	27.0886	119.041
gene-BSU_14420	ykoA	putative membrane protein of unknown function	-2.19143	1.16599	1.51058	-1.50594	1.28778	13.6877	8.08801	6.91732	4.37988	1.1245	10.4866
gene-BSU_14490	kinC	two-component sensor potassium-responsive histidine kinase regulating cannibalism and biofilm formation	-2.71342	-1.00817	1.13066	-1.17208	1.32803	38.3077	16.7068	7.82029	4.74743	3.13422	19.9292
gene-BSU_14500	ykqA	putative gamma-glutamylcyclotransferase (bacillithiol degradation)	-2.57907	1.38476	1.16057	-1.25102	1.37232	23.6649	10.0709	6.46944	3.78119	2.60033	18.5723
gene-BSU_15420	divIVA	cell-division initiation protein	-2.11162	1.13642	1.07815	1.05659	1.06089	427.629	223.467	164.968	66.2955	68.171	305.512
gene-BSU_15500	pyrC	dihydroorotase	-5.72468	2.18161	-1.50357	-1.14518	1.17019	4.33788	0.391566	0.644972	0.382857	0.033701	0.194116
gene-BSU_15530	pyrK	dihydroorotate dehydrogenase (electron transfer subunit)	-2.19965	1.04239	-1.09589	1.22548	-1.26423	18.2556	4.03069	2.96072	2.23681	1.35015	2.91627
gene-BSU_15620	sirB	sirohydrochlorin ferrochelatase	-2.71883	-1.57844	1.18725	1.17569	-1.01249	114.146	107.286	53.3321	32.7864	25.0529	65.9
gene-BSU_15630	sirC	precorrin-2 dehydrogenase	-2.73797	-1.35876	1.25145	-1.0337	-1.01471	127.354	122.637	88.4824	33.756	29.714	76.1231
gene-BSU_16070	ylqG	putative glycosyltransferase	-3.34328	-1.12367	-1.14351	-1.19817	1.24104	80.1761	27.5603	15.7648	9.73518	3.90888	12.2676
gene-BSU_16080	ylqH	putative flagellar biosynthesis protein	-3.24615	1.14224	-2.07289	-1.53581	1.61527	11.9899	3.57408	2.20766	0.174729	0.153807	0.88591
gene-BSU_16190	flgC	flagellar component of cell-proximal portion of basal-body rod	-9.33304	-1.89873	1.36122	1.1478	-1.1162	63.7038	7.04559	2.06146	0.652632	1.34046	5.33111
gene-BSU_16220	fliG	flagellar motor switching and energizing component	-11.4905	-2.34794	1.37805	-1.21699	2.14999	166.387	17.9214	4.28507	2.18025	1.15151	11.7093
gene-BSU_16230	fliH	flagellar export apparatus subunit of cytoplasmic ATPase	-10.2015	-3.53689	1.17375	1.12508	1.78414	221.473	22.7727	4.46813	2.20042	0.76094	12.2191
gene-BSU_16240	fliI	flagellar-specific ATPase subunit of export apparatus	-11.569	-4.32056	2.11993	-1.26605	1.56411	253.269	27.1041	2.91505	2.73119	1.54788	11.8242
gene-BSU_16260	ylxF	putative kinesin-like protein	-11.1687	-5.36724	2.49894	1.07812	1.31721	198.817	21.305	2.36201	2.003	1.12842	8.66608
gene-BSU_16270	fliK	flagellar hook-length control protein (ruler)	-12.7451	-2.88338	1.61203	1.11677	1.08081	294.171	26.3906	3.11847	1.54822	2.72566	12.6847
gene-BSU_16280	flgD	flagellar hook capping protein	-15.7614	-3.87121	2.06599	1.0691	1.15905	236.824	13.3035	1.47177	1.63081	1.74314	6.89041
gene-BSU_16290	flgE	flagellar hook protein	-13.7756	-2.11283	1.96587	1.21716	-1.81028	210.575	17.6434	4.82908	3.28491	4.25552	7.01819
gene-BSU_16299	swrD	flagellar power transducer required for swarming	-14.6051	-3.31022	3.1536	-1.95387	1.12347	244.632	19.8312	2.88222	3.6499	1.40562	5.78303
gene-BSU_16300	fliL	flagellar basal-body (stator) associated protein	-14.5898	-2.13959	1.18988	1.77404	-1.23528	107.259	9.53088	1.96236	0.465945	1.23046	4.92172
gene-BSU_16330	cheY	regulator of chemotaxis and motility	-17.4724	-1.63434	1.24554	-1.22979	1.03306	309.328	18.5104	4.2876	3.12202	1.07538	7.3411
gene-BSU_16340	fliZ	flagellar regulatory protein	-14.5164	-2.35538	1.33465	-1.23304	1.26533	264.012	17.3072	4.24472	3.06094	1.44579	7.69668
gene-BSU_16350	fliP	component of the flagellar export machinery	-14.4492	-4.29079	2.40025	1.30854	1.00362	222.79	15.1335	2.33693	1.18375	1.49789	6.25192
gene-BSU_16360	fliQ	component of the flagellar export machinery	-11.78	-1.54463	-1.0175	-1.28261	1.41775	173.281	15.8649	2.30578	2.55493	1.76707	7.09384
gene-BSU_16370	fliR	component of the flagellar export machinery	-10.4679	-1.77337	1.25952	-1.38449	1.22206	280.856	28.4277	5.45404	3.5376	2.11307	8.43432
gene-BSU_16380	flhB	component of the flagellar export machinery	-12.2473	-2.06132	-1.01607	-1.03732	1.29393	255.789	20.0865	4.79039	2.45686	1.48183	7.30488
gene-BSU_16390	flhA	component of the flagellar export machinery	-13.4146	-1.61785	-1.16519	1.14709	1.24602	240.689	20.6467	5.56039	2.1318	1.74859	8.18835
gene-BSU_16400	flhF	GTPase involved in the export of flagella and number regulation	-12.6994	-1.70879	-1.08398	-1.08935	1.37147	218.326	18.0798	4.14663	2.23768	1.4576	7.48799
gene-BSU_16410	flhG	ATPase affecting flagellar basal body localisation and number	-12.5938	-1.49423	-1.06259	2.07453	-1.43989	216.259	19.1952	5.66804	3.2959	6.14096	11.7904
gene-BSU_16420	cheB	methyl-accepting chemotaxis proteins (MCP)-glutamate methylesterase	-12.6834	-1.35327	-1.26042	1.30369	-1.16348	232.381	22.7573	7.43902	2.61509	3.55389	9.38207
gene-BSU_16430	cheA	chemotactic two-component sensor histidine kinase	-11.7045	-1.52992	-1.37681	1.12104	1.03643	394.483	38.813	10.3297	3.61194	3.24389	12.3738
gene-BSU_16440	cheW	modulation of CheA activity in response to attractants (chemotaxis)	-10.7236	-1.85205	-1.76656	1.3143	1.08219	455.93	47.6127	11.896	3.13845	2.21012	11.846
gene-BSU_16470	sigD	RNA polymerase sigma-28 factor (sigma-D)	-11.0755	-2.23247	1.02126	1.19084	-1.03167	352.249	33.1572	7.18859	2.76963	1.98441	10.1237
gene-BSU_16920	pgsA	CDP-diacylglycerol-glycerol-3-phosphate 3-phosphatidyltransferase	-2.16784	1.09491	1.23067	-1.18405	-1.02527	79.1721	44.0158	30.1296	18.2025	11.924	31.6218
gene-BSU_16990	tdh	threonine 3-dehydrogenase	-4.13022	1.61309	-1.36457	-1.30812	1.33457	1767.25	355.915	436.606	174.487	80.2245	218.16
gene-BSU_17000	kbl	2-amino-3-ketobutyrate CoA ligase (glycine acetyl transferase)	-6.32218	1.47123	-1.29372	-1.0726	1.21925	2431.65	361.04	377.285	146.317	81.8175	204.481
gene-BSU_17060	ymzD	putative integral inner membrane protein	-2.31203	-1.34503	1.28525	-1.26928	1.26314	47.5929	25.6025	8.64666	9.07673	1.71211	14.2445
gene-BSU_17689	.	conserved protein of unknown function	-2.8931	-1.67723	1.15448	1.00191	1.50214	33.3093	13.7068	3.60277	2.22416	0.753013	8.67454
gene-BSU_17810	yndK	putative phage/plasmid replication protein	-2.11447	1.55533	1.0992	-1.1855	1.16011	15.8982	9.6383	8.7884	6.46212	3.4367	12.9691
gene-BSU_17850	lexA	transcriptional repressor of the SOS regulon	-2.50253	-1.49029	1.2213	1.01723	1.14157	183.728	95.6789	60.7784	15.7867	16.9143	75.7296
gene-BSU_17890	tktA	transketolase	-2.14087	1.02007	1.34533	-1.87834	1.06145	908.188	562.538	357.878	247.327	81.7042	282.987
gene-BSU_18320	ppsC	non-ribosomal plipastatin synthetase C involved in synthesis of plipastatin	-2.2241	-1.23352	1.13968	-1.04778	-1.09807	315.06	170.14	59.4441	35.94	20.2274	118.126
gene-BSU_18330	ppsB	nonribosomal plipastatin synthetase B involved in synthesis of plipastatin	-2.65454	-1.23844	1.23393	-1.01499	-1.01424	253.857	112.742	35.532	23.1009	16.4112	96.7592
gene-BSU_18340	ppsA	non-ribosomal plipastatin synthetase A involved in synthesis of plipastatin	-2.45037	-1.29052	1.23398	-1.1063	1.11662	200.467	83.98	30.5637	21.3673	10.3496	74.727
gene-BSU_18610	yoaH	putative methyl-accepting chemotaxis protein	-4.0495	1.58755	-2.16206	1.40741	-1.03231	29.6151	5.82855	6.21575	2.71794	2.13523	3.70443
gene-BSU_18970	yobI	putative phage repair NTPase with transmembrane helices; putative defective prophage 6	-2.21618	-1.16727	-1.26218	1.34989	1.04334	20.5629	10.9472	6.3591	2.3776	1.07051	8.72939
gene-BSU_19580	yodF	putative Na+/metabolite permease	-2.16601	-1.23824	1.88811	-1.53447	1.31946	215.591	132.436	75.5756	85.8241	31.3884	111.537
gene-BSU_20060	nrdEB	SPbeta phage ribonucleoside reductase alpha (large) subunit	-4.70909	1.64077	-2.2951	1.32828	1.05715	4.77575	0.431091	0.769249	0.154551	0.123677	0.237455
gene-BSU_20870	yopJ	conserved protein of unknown function; phage SPbeta	-2.4069	-1.11483	-2.04118	2.14132	-1.33012	42.8043	19.336	16.4224	2.36325	4.05652	10.3845
gene-BSU_20890	sieB	superinfection exclusion protein B; phage SPbeta	-2.0074	1.04802	-2.19487	2.61855	-1.13527	14.9356	7.35116	6.37631	1.37636	2.10002	7.75378
gene-BSU_21440	bdbB	thiol-disulfide oxidoreductase B; bacteriophage SPbeta	-8.70899	-1.49468	1.53109	1.25631	1.40425	75.1135	8.45546	4.17825	2.97626	1.64955	14.1587
gene-BSU_21450	sunS	sublancin glycosyltransferase; phage SPbeta	-8.13915	-1.62081	-1.17663	1.58798	1.22217	37.9217	3.44171	1.22648	0.349459	0.136717	4.33112
gene-BSU_21470	sunT	sublancin 168 lantibiotic transporter	-7.45073	-1.00665	1.0855	-1.19093	1.99406	20.7531	2.33969	1.22474	0.511814	0.14335	4.67884
gene-BSU_21490	sunI	protein of immunity to sublancin	-2.3034	-1.30734	-1.76344	2.19252	-1.07311	48.9593	11.6214	14.3567	6.19795	3.00069	12.8318
gene-BSU_21530	yolB	conserved protein of unknown function; phage SPbeta	-6.48789	-1.54678	1.29277	1.94611	-1.99757	341.398	50.818	27.6112	12.974	25.6354	35.4563
gene-BSU_21550	yokL	putative N-acetyltransferase; phage SPbeta	-2.11188	1.12172	-1.26427	1.30749	-1.31494	75.6867	46.5568	33.2265	11.0727	8.52851	36.4915
gene-BSU_21560	yokK	conserved protein of unknown function; phage SPbeta	-2.08585	-1.04599	-1.63965	1.5261	-1.26135	67.903	46.1297	27.06	5.36139	5.01905	24.019
gene-BSU_21610	nukF	calcium-dependent DNA nuclease, lipoprotein; phage SPbeta	-4.62047	1.49873	1.29828	-1.33894	-1.09655	14.2084	4.52476	4.42523	0.71892	1.07095	5.14047
gene-BSU_21620	yokE	conserved protein of unknown function; phage SPbeta	-4.76576	1.38114	1.21101	1.12524	-2.68363	14.4891	3.99957	3.22236	0.612096	1.1674	2.93102
gene-BSU_22060	pbuX	xanthine permease	-88.5173	-1.44342	1.53183	1.23522	1.12745	200.072	1.97701	1.02421	0.636031	0.856274	1.89694
gene-BSU_22070	xpt	xanthine phosphoribosyltransferase	-48.6892	-1.43051	1.26246	-1.19301	-1.04971	128.499	2.87148	1.0642	0.336914	0.222428	1.13881
gene-BSU_22390	ypmA	conserved protein of unknown function	-1.94863	1.43225	-2.90525	2.15855	1.69007	12.8754	3.43822	9.70853	0.576301	1.26823	11.6878
gene-BSU_22600	aroA	3-phosphoshikimate 1-carboxyvinyltransferase (5-enolpyruvoylshikimate-3-phosphate synthase)	-2.16865	1.24673	-1.21251	-1.25148	1.09354	149.81	98.2831	95.9396	27.4891	16.918	52.2818
gene-BSU_22730	ndk	nucleoside diphosphate kinase	-2.58249	1.06686	1.60569	-1.50412	-1.16538	871.588	509.918	217.204	161.399	76.1447	361.601
gene-BSU_22960	gudB	cryptic glutamate dehydrogenase (active after removal of a 9 bp insert)	-2.20904	1.02275	1.70384	-1.31527	-1.28393	896.671	637.062	259.319	219.621	99.0768	528.19
gene-BSU_23210	spcB	chromosome condensation and segregation factor	-2.06954	1.7706	-1.73335	1.97141	-1.07347	11.3844	6.64574	6.81252	1.99086	3.94305	12.0567
gene-BSU_23720	yqzH	conserved protein of unknown function	-2.95706	-1.12753	1.68874	-1.05242	-1.30746	27.3501	15.8244	4.5113	5.23682	6.07649	15.2873
gene-BSU_23860	gndA	NADP+-dependent 6-P-gluconate dehydrogenase	-2.46932	-1.10826	1.11398	-1.03232	1.1281	274.319	102.219	73.2942	31.8357	17.0418	105.837
gene-BSU_24540	yqhL	putative sulfur transferase	-2.57295	1.05815	1.33754	1.368	1.04698	21.4638	13.8883	9.53175	3.49184	2.61835	29.7257
gene-BSU_24960	pstBA	phosphate ABC transporter (ATP-binding protein)	-4.13668	1.32378	1.10345	-1.09242	1.73715	23.2983	5.28832	2.81817	3.71074	1.76707	6.68261
gene-BSU_24970	pstA	phosphate ABC transporter (permease)	-5.50062	1.12193	1.34472	-1.03632	1.38345	21.0573	4.65034	1.87589	2.11571	1.12722	5.55171
gene-BSU_24980	pstC	phosphate ABC transporter (permease)	-5.07967	-1.51926	-1.1781	1.33997	1.18172	41.0914	8.12815	2.78924	1.16561	1.44579	4.56672
gene-BSU_24990	pstS	phosphate ABC transporter (phosphate binding lipoprotein)	-5.16945	-1.47759	1.07826	1.16945	-1.01307	28.91	7.069	2.52793	1.1459	0.480327	3.41218
gene-BSU_25050	yqgA	cell wall protein	-3.43548	-1.15778	1.08653	1.27624	-1.1071	312.694	156.235	91.6667	25.4983	29.4212	203.627
gene-BSU_26160	yqbC	conserved phage protein of unknown function; skin element	-2.41241	1.56586	-1.19228	1.0668	-1.31138	5.6509	2.18325	2.69712	0.226026	0.862165	3.18332
gene-BSU_26200	yqaS	putative phage-related terminase small subunit; skin element	-5.51673	1.11223	-1.95882	1.38425	1.16532	17.4737	3.38297	1.87344	1.09497	1.14458	1.38793
gene-BSU_26760	yrdC	putative hydrolase	-3.32243	1.31526	-1.49945	1.66762	1.02752	16.4513	6.7014	5.88708	1.13574	1.61497	8.5638
gene-BSU_27370	yrrL	conserved membrane associated protein	-2.05894	1.58409	-1.09678	-1.39467	1.58369	27.5901	13.5719	14.3712	6.32414	3.76465	18.762
gene-BSU_27700	yrbF	component of the preprotein translocase	-2.00644	1.28955	-1.20153	-1.01435	-1.09294	288.316	210.764	337.317	65.6983	56.8567	223.628
gene-BSU_28900	pftB	pyruvate import system subunit B	-2.24935	1.0675	1.46992	-1.12217	-1.35695	9.26408	4.70639	4.77057	4.31853	2.74201	2.99122
gene-BSU_29950	ytlQ	putative hydrolase	-2.76985	-1.18409	1.25486	-1.73381	1.60845	141.193	53.6073	32.3187	33.2799	7.72666	26.4844
gene-BSU_30260	msmR	transcriptional regulator (LacI family)	-8.95923	1.10342	1.92394	-1.58267	1.26587	87.5964	4.95019	4.9123	6.47461	1.76009	4.98849
gene-BSU_30270	msmE	multiple sugar-binding lipoprotein	-7.81707	-1.29779	1.71273	-1.62698	1.78361	740.341	40.9792	31.5897	37.0418	9.75143	25.6783
gene-BSU_30280	msmF	carbohydrate ABC transporter (permease)	-7.99729	-1.018	1.28698	-1.54433	1.51474	681.388	38.2195	39.7064	36.0368	12.175	18.9014
gene-BSU_30290	msmG	maltose and multiple sugars ABC transporter (permease)	-5.66557	1.1371	1.33929	-1.77269	1.47501	748.184	53.7703	60.8075	71.0941	21.0343	28.3598
gene-BSU_30300	melA	alpha-D-galactoside galactohydrolase	-4.84725	1.48756	1.04014	-1.61897	1.71739	884.198	65.24	95.2131	88.3437	27.2796	45.0034
gene-BSU_31120	lytG	exoglucosaminidase	-2.47015	-1.68041	1.58095	1.48187	-1.34776	17.9677	8.40898	3.91086	1.3929	1.6859	9.71058
gene-BSU_31160	yubA	putative integral membrane protein	-2.07748	-1.36523	1.19752	1.09498	1.06045	79.4402	46.2778	24.9842	8.44451	8.58551	45.3128
gene-BSU_31230	tlpB	methyl-accepting chemotaxis protein	-4.94137	-1.94865	-1.05487	1.54043	-1.2488	18.6202	3.5049	2.19101	1.11479	1.24298	1.29791
gene-BSU_31240	mcpA	methyl-accepting chemotaxis protein	-7.05247	-1.78709	1.11947	1.58302	-1.14707	345.528	52.1877	16.4574	14.0428	18.4327	16.6467
gene-BSU_31250	tlpA	methyl-accepting chemotaxis protein (membrane curvature dependent localisation)	-2.63526	1.42946	-1.76114	1.31174	1.27145	31.9824	11.2748	12.207	5.00417	4.92832	6.28021
gene-BSU_31350	pgi	glucose-6-phosphate isomerase	-2.00829	-1.26438	1.41382	1.07253	-1.63611	775.449	436.964	235.511	127.864	135.25	271.061
gene-BSU_31400	yugH	putative aspartate aminotransferase	-2.82854	-1.32587	2.29823	-1.2646	-1.07002	223.636	91.2976	38.519	29.0719	23.1624	130.974
gene-BSU_31440	patB	promiscuous cystathionine / cystine beta-lyase / cysteine desulfhydrase	-2.10624	1.33687	1.20039	-1.97554	1.23313	67.6881	44.9539	41.3613	24.7638	7.78786	19.0303
gene-BSU_31500	yuxK	putative thiol-disulfide oxidoreductase	-2.23607	-1.62645	2.07638	-1.16679	-1.3081	171.128	104.684	43.3586	31.6589	19.6962	83.879
gene-BSU_31580	maeN	Na+/malate symporter	-3.55667	-2.09302	1.86446	-1.37688	1.47806	61.1774	13.5932	4.00558	5.99917	1.86761	8.28428
gene-BSU_31740	pdeH	cyclic di-GMP phosphodiesterase	-2.67667	1.15434	1.40914	-1.50224	1.06406	22.6306	10.9939	8.18269	5.60839	3.13841	14.624
gene-BSU_32110	trxBB	ferredoxin-NADP+ reductase (flavodoxin)	-2.55198	1.0542	1.04259	-1.23298	1.05016	177.492	124.851	102.721	31.1228	27.8303	70.8551
gene-BSU_32200	yutJ	putative NADH dehydrogenase	-2.38407	-1.02963	1.41855	1.10818	-1.13569	73.1098	40.8158	31.5749	18.3162	22.499	36.2576
gene-BSU_33210	yvrG	two-component sensor histidine kinase YvrG [cell wall processes and sublancin production and immunity (YvrH)]	-2.70713	1.28809	1.25138	-1.06035	-1.03286	44.3459	18.4558	11.4297	6.86948	6.3953	25.083
gene-BSU_33221	yvrH	two-component sensor histidine kinase YvrG [cell wall processes and sublancin production and immunity (YvrG)]	-3.83045	1.44426	1.12876	1.24753	1.06745	6.82796	2.70559	2.17983	0.89714	0.911209	6.06489
gene-BSU_34980	yvoD	putative integral inner membrane protein with nucleotide binding domain	-2.02078	-1.10886	1.80117	-1.8755	1.44003	142.441	86.9427	53.5927	55.833	15.6126	53.566
gene-BSU_34990	lgt	prelipoprotein diacylglycerol transferase	-2.12922	-1.10546	1.51346	-1.6415	1.65657	73.0013	35.8776	21.0082	22.0211	6.747	28.2726
gene-BSU_35640	lytA	membrane bound lipoprotein	-12.5829	-1.77883	-1.61718	1.82011	-1.63256	51.9122	5.4363	1.34317	0.159462	0.280735	0.808501
gene-BSU_35920	rbsK	ribokinase	-2.08334	-1.57288	1.79627	-1.05048	-1.35504	3144.82	1722.19	721.261	381.899	311.975	1009.6
gene-BSU_36390	flhP	flagellar hook-basal body accessory protein	-4.30753	-1.86733	1.11142	1.50637	-1.35442	268.124	71.4441	31.2561	10.4022	16.2785	25.2911
gene-BSU_36400	flhO	flagellar basal-body accessory rod protein	-3.01487	-1.59417	-1.26883	2.18386	-1.35929	114.321	44.1133	20.2925	6.72741	10.2966	22.2273
gene-BSU_36690	rapB	response regulator aspartate phosphatase	-2.23689	-1.79287	1.6942	1.26526	1.01937	81.6133	45.9209	16.1038	10.1676	8.83535	43.4737
gene-BSU_36890	upp	uracil phosphoribosyltransferase	-2.12314	1.00187	1.62507	-1.10799	-1.18417	129.43	65.5929	63.0794	26.7486	22.6506	89.2238
gene-BSU_37640	lipL	amidotransferase of the octanoyl moiety from octanoyl-GcvH to the E2 subunit of pyruvate dehydrogenase	-2.31577	1.09338	1.44367	-1.85127	1.28835	18.1243	13.9985	7.11356	5.88256	2.61472	10.1388
gene-BSU_37680	bacG	cyclohexenol-containing tetrahydro-4-hydroxyphenylpyruvate H(4)HPP in bacilysin synthesis	-2.31195	-2.29893	1.74678	1.40688	1.11745	204.745	87.329	26.4721	11.8131	11.8443	98.2225
gene-BSU_38140	qoxD	cytochrome aa3-600 quinol oxidase (subunit IV)	-2.15131	1.10004	-1.01005	-1.54475	-1.01494	1140.05	220.392	340.056	86.3275	36.3181	159.223
gene-BSU_38160	qoxB	cytochrome aa3-600 quinol oxidase (subunit I)	-3.14028	-1.11589	-1.02348	-1.28423	1.09495	2585.13	403.716	313.461	119.596	59.2105	306.369
gene-BSU_38800	yxkH	putative exported polysaccharide deacetylase, lipoprotein	-2.70392	-1.27278	1.10071	-1.0874	-1.23106	6.36542	2.69971	2.34695	1.17318	0.774528	1.18965
gene-BSU_39340	hutP	transcriptional antiterminator	-5.82122	-1.2731	1.26716	-1.69417	2.30222	571.355	169.109	38.997	57.3206	14.846	84.5797
gene-BSU_39350	hutH	histidine ammonia-lyase (histidase)	-10.6411	-1.11741	1.00795	-3.07968	2.31211	5559.63	980.334	181.223	295.739	25.99	134.648
gene-BSU_39360	hutU	urocanase	-9.44566	-1.26443	1.04713	-3.00982	2.00173	8522.65	1720.88	300.96	459.918	41.099	179.1
gene-BSU_39370	hutI	imidazolone-5-propionate hydrolase	-8.52755	-1.34389	-1.01193	-2.75782	1.84004	9145.56	2062.49	343.817	504.997	48.17	202.992
gene-BSU_39380	hutG	formiminoglutamate hydrolase	-8.83094	-1.41607	-1.04028	-2.57571	1.77183	10530.7	2213.77	328.681	489.195	52.9067	234.299
gene-BSU_39390	hutM	histidine degradation metabolites permease	-9.41968	-1.4766	-1.04915	-2.47369	1.74993	7678.98	1567.48	222.851	324.006	35.9016	164.743
gene-BSU_39460	yxeQ	putative catabolic enzyme	-3.84774	-1.03055	1.60357	-1.16229	-1.29569	8.99151	8.66274	6.66917	7.77037	7.09926	5.22806
gene-BSU_39470	sndB	N-acetyl-sulfur-metabolite deacetylase	-3.18052	-1.31637	1.20255	1.06111	-1.15497	11.7638	10.7285	6.53606	5.64729	5.12286	3.49714
gene-BSU_39480	yxeO	putative ABC transporter (ATP-binding protein)	-2.55745	-1.16121	-1.09966	1.24102	-1.3034	9.54064	7.16722	4.84213	3.15352	3.41205	3.33102
gene-BSU_39600	yxeC	putative integral membrane protein of unknown function	-2.68725	1.80042	-1.32675	-1.38525	1.06329	40.9909	18.7348	29.9057	13.3372	5.65269	17.5317
gene-BSU_39800	yxcD	conserved protein of unknown function	-5.65588	2.01151	-1.20653	1.83146	1.06834	4.32601	0.54363	0.671585	0.956771	0.421102	2.9645
gene-BSU_39950	yxaJ	putative integral membrane protein of unknown function	-3.7504	-1.07517	1.60848	-1.60651	-1.26812	39.8696	27.7998	9.25558	2.42898	2.03632	15.0522
gene-BSU_40200	yydD	putative DNA wielding protein	-4.56184	1.03186	1.22861	-1.14658	-1.20708	24.5138	5.62801	5.71534	1.20316	0.886683	6.19483
gene-BSU_40220	yydB	putative phosphohydrolase	-3.56042	-1.10815	1.33363	1.02612	-1.31219	24.7967	6.33126	4.73593	1.63564	1.04984	5.3559
gene-BSU_40370	walJ	putative hydrolase	-2.17643	-1.38144	1.54861	-1.2067	-1.18523	74.9721	37.8223	18.1417	10.6605	5.07389	23.6733
gene-BSU_40740	yyaR	putative acetyl-transferase	-2.05646	1.26125	-1.79647	1.42057	1.07707	14.7623	7.24059	4.17425	0.943941	1.57873	7.17893
gene-BSU_35610	tuaAn	putative undecaprenyl-phosphate N-acetylgalactosaminyl-1-phosphate transferase; N-terminal part of TuaA	-1.92403	1.39445	-2.42942	1.78667	1.24261	9.22223	3.45641	6.83193	2.12911	2.1419	4.11237
gene-BSU_35690	ggaA	poly(glucosyl N-acetylgalactosamine 1-phosphate) glucosyltransferase (missing signal peptide)	-4.17125	1.82607	-1.16269	-1.06444	1.80992	1.81774	0.62633	0.46425	0.293952	0.226409	1.24199

## Sheet: cluster 3
Table S3. List of the differentially expressed genes in cluster 3
Gene_ID	Gene_Symbol	Description	fold change					Transcripts per millions mapped reads (TPM)
			10H/8H	12H/10H	15H/12H	18H/15H	24H/18H	8H	10H	12H	15H	18H	24H
gene-BSU_00490	spoVG	regulator required for spore cortex synthesis (stage V sporulation)	1.21796	-2.63294	-1.00628	1.43347	-1.50702	10843.4	12326.1	7500	2005.47	1905.04	4548.15
gene-BSU_00640	spoIIE	SpoIIAA-phosphate serine phosphatase	3.80916	-3.63065	-2.96785	3.4707	-2.51867	149.476	1265.65	538.683	87.3398	49.9215	75.9672
gene-BSU_00990	rpmGB	ribosomal protein L33	-1.24903	-2.29428	-1.22615	1.73561	-1.02561	147.828	104.709	34.5866	13.7966	10.988	60.5136
gene-BSU_01000	secE	preprotein translocase subunit	-1.21747	-1.50192	-2.9414	2.40963	-1.27908	138.916	95.1897	79.5492	9.30725	8.19278	42.5631
gene-BSU_01060	rlmG	23S rRNA m2G1835 methyltransferase	1.00346	-1.62001	-1.24648	1.60454	-2.02007	93.0345	170.061	73.9674	22.2789	21.1142	55.3796
gene-BSU_01140	ybaC	putative proline iminopeptidase	-1.00565	1.06418	-2.02427	2.3668	1.15235	4.84772	7.54777	5.52952	1.95653	2.35677	6.78735
gene-BSU_01510	ybaJ	putative methyltransferase	1.01876	-1.77406	-1.02026	2.34799	-1.2279	66.0383	100.395	37.4238	11.8052	19.7666	106.372
gene-BSU_01920	skfB	synthesis of sporulation killing factor A	1.26703	-5.04032	-1.73945	1.79595	-2.33809	1287.82	2645.07	520.987	132.116	45.5194	133.862
gene-BSU_01935	skfC	sporulation killing factor biosynthesis and export	1.10882	-4.71462	-1.8454	1.89411	-2.08167	1340.9	2405.77	428.54	106.512	47.4171	162.474
gene-BSU_01950	skfE	sporulation killing factor biosynthesis and export; ABC transporter (binding protein)	1.17231	-4.58713	-1.71612	1.76502	-1.86963	1223.6	2152.15	425.127	110.25	53.2531	164.816
gene-BSU_01960	skfF	sporulation killing factor biosynthesis and export; ABC transporter (permease)	1.14427	-3.90938	-2.20579	2.06993	-1.80641	794.742	1252.99	310.971	71.3809	33.4338	117.974
gene-BSU_01970	skfG	sporulation killing factor biosynthesis and export	1.36739	-3.28908	-2.40972	1.88257	-1.57621	197.036	380.075	115.021	20.0532	13.4492	31.1476
gene-BSU_01980	skfH	sibling killing effect; sporulation killing factor biosynthesis and export	1.23839	-3.16994	-2.01305	1.96074	-1.72927	840.584	1540.82	535.849	103.637	67.6057	173.198
gene-BSU_01990	ybdG	putative hydrolase/transferase	1.15821	-2.8903	-2.56768	1.81794	-1.551	70.3504	115.251	35.011	5.03821	3.41489	8.60003
gene-BSU_02000	ybdJ	two-component system response regulator [YbdK]	1.33973	-3.08512	-2.33005	1.54408	-1.67855	67.5156	125.611	31.1897	7.25907	3.61446	9.91376
gene-BSU_02010	ybdK	two-component system sensor histidine kinase [YbdJ]	1.12436	-2.93959	-2.60564	2.25245	-1.49399	50.3798	79.3683	18.6401	5.32135	4.54904	8.82047
gene-BSU_03010	amhX	putative amidohydrolase	1.07074	-2.41212	1.02174	1.32231	1.49956	367.426	202.322	144.381	66.8531	28.5768	135.829
gene-BSU_03510	srfAC	surfactin synthetase	1.22299	-3.2237	-1.15814	-1.18327	-1.74588	8612.24	18390.5	5515.78	1780.11	791.896	1224.07
gene-BSU_05600	ydgE	putative N-acetyltransferase	1.02112	-2.70577	-1.29131	1.41451	-1.06864	199.399	168.868	101.133	33.4729	26.9941	70.9775
gene-BSU_06070	bsuMB	DNA-methyltransferase (cytosine-specific); defective prophage 3	-1.00164	-1.58389	-1.4722	2.164	-1.96751	64.2495	52.4046	32.4582	9.93897	14.2354	24.4133
gene-BSU_06780	yeeC	conserved hypothetical protein; HGT island	-1.01071	-1.1718	-2.00894	1.63984	1.01529	31.4116	22.3683	16.7063	3.17341	3.88814	10.8715
gene-BSU_06830	rapH	response regulator aspartate phosphatase	1.2488	-2.18667	1.13644	1.19673	-1.23757	433.135	639.252	240.822	103.253	60.5542	235.101
gene-BSU_06870	yesE	conserved hypothetical protein	-1.17779	-2.91495	-1.31711	-2.04869	3.23669	53.8379	31.7803	13.7879	6.10372	1.36763	5.25161
gene-BSU_07460	yfmI	putative efflux transporter	-1.35111	-3.97768	-3.54688	1.85266	1.92999	26.2106	14.652	6.96831	0.564973	0.319707	4.43318
gene-BSU_07480	yfmG	putative enzyme	-1.26996	-3.89403	-3.29687	1.74294	1.13257	1560.98	1870.06	436.585	48.8362	24.8568	244.764
gene-BSU_08029	yfzA	conserved hypothetical protein	-1.26385	1.17291	-1.81567	1.05645	2.2327	47.4146	24.2221	36.9183	10.8882	6.17302	51.7743
gene-BSU_08750	ygxA	conserved hypothetical protein	-1.00243	-2.09447	-1.29056	1.58346	-1.25925	194.669	153.177	68.4698	21.8809	18.8197	68.7847
gene-BSU_08940	yhbD	putative sporulation-related protein	1.50463	-1.81028	-1.82195	-1.34416	2.52507	9.65075	14.2913	6.51213	2.88632	0.725917	5.45879
gene-BSU_08950	yhbE	conserved protein involved in sporulation	1.13214	-2.76771	-1.05647	-1.61307	2.06916	30.6157	23.9974	11.3351	6.34899	1.45793	7.23121
gene-BSU_09200	srtA	sortase A	1.3142	-2.45176	1.04061	1.15637	-1.57884	229.573	230.729	87.5963	46.7976	30.4414	54.6801
gene-BSU_10180	yhfC	putative integral membrane protein	1.28585	-2.20529	-1.37782	1.38029	-1.25016	122.147	170.576	82.9278	17.6929	16.0767	43.0847
gene-BSU_10460	yhjC	putative exported protein	-1.14505	-2.14759	-1.2004	-1.12511	1.67291	43.0323	15.8789	12.9055	5.63828	2.80525	10.772
gene-BSU_10540	ntdB	biosynthesis of neotrehalosadiamine (3,3'-diamino-3,3'-dideoxy-alpha,beta-trehalose);kanosamine-6-phosphate phosphatase (recent HGT island)	1.46794	-1.21778	-2.18022	1.85746	-1.12189	3.14897	4.25396	2.81093	0.580373	0.868493	2.05982
gene-BSU_11190	argC	N-acetylglutamate gamma-semialdehyde dehydrogenase	-1.03273	-2.78758	-1.15768	-1.04662	1.67193	677.535	744.104	360.161	190.496	141.988	251.592
gene-BSU_11200	argJ	ornithine acetyltransferase; amino-acid acetyltransferase	-1.00643	-3.85894	-1.052	-1.25902	1.44869	1778.71	1778.32	650.348	396.571	223.546	321.303
gene-BSU_11210	argB	N-acetylglutamate 5-phosphotransferase (acetylglutamate kinase)	1.08229	-4.40076	-1.10325	-1.57524	1.67391	1659.77	1619.82	567.408	353.857	145.918	227.534
gene-BSU_11220	argD	N-acetylornithine aminotransferase	1.12502	-4.47011	-1.19834	-1.89558	1.60283	3284.4	3306.47	1273.7	697.959	232.187	340.222
gene-BSU_11230	carA	arginine-specific carbamoyl-phosphate synthetase (small subunit)	1.16784	-4.35237	-1.15359	-2.01721	1.52476	5020.51	5257.34	1862.7	1187.95	363.162	463.191
gene-BSU_11240	carB	arginine-specific carbamoyl-phosphate synthetase (large subunit)	1.11965	-4.22267	-1.2728	-1.99573	1.47017	5112.91	5207.49	2028.27	1167.12	355.024	449.198
gene-BSU_11250	argF	ornithine carbamoyltransferase	1.02904	-4.35944	-1.29092	-2.39255	1.62214	5933.82	5845.77	2374.48	1291.84	329.91	449.601
gene-BSU_12010	manP	phosphotransferase system (PTS) mannose-specific enzyme IIBCA component	1.34691	-2.40288	-1.85216	1.16197	1.60484	8.49528	7.39705	3.98463	0.908271	1.08822	1.57767
gene-BSU_12510	xre	phage PBSX transcriptional regulator	-1.04393	-1.85174	-1.65207	2.77931	1.13909	23.4516	24.0676	13.3492	2.8815	6.34116	16.5577
gene-BSU_13080	ykkB	putative N-acetyltransferase	1.40134	-1.69503	-1.16042	2.06274	-1.2859	20.6048	30.9099	17.993	3.03807	8.10643	26.7958
gene-BSU_13530	kinE	two-component sensor histidine kinase	1.0564	-2.04686	-1.21928	1.73326	-1.60795	129.35	112.897	45.8659	16.669	17.1968	46.6148
gene-BSU_13545	.	hypothetical protein	1.01418	-1.56851	-1.22304	2.57445	-1.71233	84.2482	65.3263	58.4679	16.8156	54.3891	45.6033
gene-BSU_13700	clpE	ATP-dependent Clp protease (class III stress gene)	1.79997	-2.71914	-2.56403	1.11915	1.26456	36.2455	47.1149	21.7896	3.23799	2.2926	7.41549
gene-BSU_13990	kinA	sporulation-specific ATP-dependent protein histidine kinase	1.0568	-2.23923	-1.35945	1.43714	-1.68927	133.125	143.444	52.0794	15.0446	13.8862	36.9961
gene-BSU_15130	mraZ	inhibitor of RsmH and transcriptional regulator	1.25907	-2.18138	-1.12689	1.27901	-1.61938	802.334	1273.67	436.896	140.293	84.3375	299.946
gene-BSU_15160	pbpB	penicillin-binding protein 2B	1.25796	-2.04123	-1.67265	1.81373	-1.59306	124.217	200.938	90.6392	18.1426	15.708	47.4257
gene-BSU_15310	spoIIGA	protease processing pro-sigma-E	4.17931	-2.88173	-2.07326	1.91715	-1.51403	57.325	439.372	175.834	48.9028	19.1217	57.2184
gene-BSU_15320	sigE	RNA polymerase sporulation-specific sigma-29 factor (sigma-E)	3.389	-2.79885	-2.72776	2.54102	-1.7038	95.4501	565.189	274.82	49.2053	21.3253	62.1097
gene-BSU_16020	rimM	16S rRNA processing protein	1.10576	-1.39481	-2.27691	1.91256	-1.04512	8.2376	14.8784	6.52205	1.97095	2.23064	4.7586
gene-BSU_17450	glnR	transcriptional regulator (nitrogen metabolism)	-1.06961	-1.05824	-2.00515	1.213	1.23116	96.5551	68.3455	61.7982	19.6853	11.6939	36.9433
gene-BSU_17630	yncC	putative sugar transporter	-1.22468	-2.14512	1.05462	-1.08669	1.50996	138.938	62.578	30.3366	21.9922	11.1191	29.5816
gene-BSU_17900	pcfA	factor controlling DNA replication	1.83501	-2.9936	-3.42372	4.32766	-2.24147	46.6161	134.536	68.0126	6.39346	11.6439	26.2681
gene-BSU_17910	yneF	putative acyltransferase	1.07434	-2.12433	-1.10978	1.77615	-1.1827	103.406	131.931	107.55	33.5241	21.7858	119.78
gene-BSU_18490	rtp	replication terminator protein	1.26132	-2.63709	-1.89516	1.98124	-1.32413	24.2927	22.3065	16.3091	4.13952	2.35087	9.25284
gene-BSU_18820	yobB	putative transcriptional regulator from bacteriophage; putative defective prophage 6	2.1059	-1.69942	-1.6273	1.70465	1.12862	46.1663	137.758	94.3272	25.5701	31.3801	108.826
gene-BSU_18850	yobD	transcriptional regulator (phage-related, Xre family); putative defective prophage 6	-1.12957	1.14677	-3.44342	2.3663	2.38856	5.10294	2.47761	4.59115	1.1628	0.895619	8.35212
gene-BSU_18908	yozY	putative transcriptional regulator from bacteriophage; putative defective prophage 6	1.19696	-2.01146	1.00666	1.28757	1.36337	133.162	173.452	102.17	39.2679	34.0674	200.372
gene-BSU_18980	yobJ	conserved protein of unknown function; putative defective prophage 6	-1.65154	-1.84524	-2.68577	1.81691	-1.09336	37.1239	21.9193	13.9085	1.81196	1.23483	7.01372
gene-BSU_20790	yopR	putative DNA breaking-rejoining enzyme; phage SPbeta	1.02487	-1.58939	-2.09981	1.23179	1.08785	84.5009	62.6067	49.0154	11.6383	4.70102	17.6258
gene-BSU_20860	aimR	arbitrium peptide sensor regulator; phage SPbeta	1.17398	-2.0365	-1.59222	-1.01454	-1.16668	8.39822	10.9962	4.46856	1.99472	0.635099	2.29528
gene-BSU_21130	yonD	conserved protein of unknown function; phage SPbeta	1.42913	-1.25163	-2.06845	1.76295	1.21274	1.4227	2.33795	1.08309	0.617207	0.392384	1.10107
gene-BSU_21630	aacD	aminoglycoside N3'-acetyltransferase	-1.47973	-2.53071	-1.27516	2.42923	-1.24304	70.4709	42.4569	12.0356	3.4293	5.87847	24.5048
gene-BSU_21740	ypmR	putative exported lipase/acylhydrolase (lipoprotein)	1.44042	-1.57861	-2.58364	1.77498	-1.28861	122.35	135.61	109.84	19.5683	17.5076	42.3968
gene-BSU_24220	spo0A	response regulator, phosphorylated in response to complex YlbF/YmcA/YaaT	1.42894	-2.20248	-1.21227	1.59393	-1.91742	1353.85	2022.05	1184.59	324.385	274.969	467.752
gene-BSU_24600	sinI	antagonist of SinR	-1.14846	-2.34166	-1.03004	1.1805	1.04655	338.93	600.004	314.261	149.52	54.3416	237.383
gene-BSU_24680	comGF	component of the DNA transport pilin platform	3.23131	-3.82471	-1.7756	1.14535	-1.01419	12.0814	61.6808	15.4019	4.74773	3.50151	7.15649
gene-BSU_24700	comGD	membrane component of the DNA transport pilin platform	3.95016	-2.86043	-2.23108	-1.14401	1.20626	12.0132	87.8794	30.7437	6.84357	3.71487	10.0239
gene-BSU_24710	comGC	pilin-like component of the DNA transport membrane pilin platform	4.26972	-2.31285	-2.76441	1.18723	1.26918	4.23605	22.0582	8.03528	1.65905	2.04454	7.00973
gene-BSU_24720	comGB	membrane pilin platform component of the DNA transport machinery	3.88108	-2.59192	-2.10861	-1.20053	1.34853	15.7749	110.692	41.8455	10.4935	5.44401	13.1082
gene-BSU_24730	comGA	membrane associated ATPase of the pilin platform for DNA competence	4.27238	-2.81549	-2.0338	-1.15383	1.31603	16.4458	115.674	44.6623	10.8117	5.66975	16.9506
gene-BSU_25590	comEA	membrane bound high-affinity DNA-binding receptor	3.63671	-4.17584	-1.49296	2.34269	1.21666	2.16301	9.78535	1.67896	0.637847	1.54404	2.56025
gene-BSU_25850	yqzI	hypothetical protein; skin element	1.54185	-2.33147	-1.38399	1.63486	-1.63327	9.39624	11.6214	5.22062	2.78908	1.36395	4.18997
gene-BSU_26140	yqbE	putative phage capsid protein; skin element	1.01639	-1.61307	-2.59644	1.29897	1.62574	2.68826	2.15361	1.44111	0.421143	0.278036	1.06764
gene-BSU_26350	sknR	skin element; transcriptional repressor of yqaF-yqaN operon (Xre family)	-1.41862	1.29947	-2.34624	1.27354	2.12736	4.48044	2.63219	4.13857	0.842285	0.247143	6.16856
gene-BSU_27660	comN	post-transcriptional regulator	1.29284	-2.38065	-1.75265	1.86381	-1.48282	41.831	41.0057	22.359	5.80666	3.65097	15.9822
gene-BSU_28060	spoIIB	spatial and temporal regulator of the dissolution of septal peptidoglycan during engulfment (stage II sporulation)	2.85608	-2.78029	-3.15017	3.82911	-2.48706	182.608	1033.45	516.618	65.0077	73.201	123.288
gene-BSU_28070	comC	membrane prepilin peptidase	2.84309	-2.05032	-1.28555	-1.16711	1.44199	3.1579	16.4159	10.001	3.62792	2.20642	5.12808
gene-BSU_28250	leuD	3-isopropylmalate dehydratase (small subunit)	1.37802	-2.04024	1.28265	1.42158	1.2142	69.1959	67.4727	34.5866	30.6318	28.0482	79.9445
gene-BSU_28270	leuB	3-isopropylmalate dehydrogenase	1.51959	-2.23295	1.01896	1.85419	1.41673	66.6006	67.6976	36.0041	20.4634	16.433	90.2531
gene-BSU_28280	leuA	2-isopropylmalate synthase	1.67286	-2.39734	-1.06802	1.71381	1.5948	84.1364	85.1237	35.1198	24.7793	13.4271	94.2934
gene-BSU_28290	ilvC	acetohydroxy-acid isomeroreductase (NADP-dependent)	1.41695	-3.02805	-1.12175	1.74214	1.51443	132.658	108.723	39.5276	24.7566	13.1933	91.7731
gene-BSU_28300	ilvH	acetohydroxy-acid synthase (small subunit)	1.42398	-2.56752	-1.21728	1.98525	1.63796	45.7548	33.4993	11.7954	10.4434	4.01143	44.4457
gene-BSU_28310	ilvB	acetohydroxy-acid synthase (large subunit)	1.12886	-2.5095	1.08315	1.67526	1.66314	87.5661	59.5483	26.8873	18.0527	9.45418	94.2824
gene-BSU_29200	accA	acetyl-CoA carboxylase (carboxyltransferase alpha subunit)	1.01523	-2.56082	-1.00598	1.19627	-1.0847	489.478	534.776	229.375	77.5884	51.0903	200.781
gene-BSU_31040	yuaD	conserved protein of unknown function	1.41632	-3.56591	1.29833	-1.20125	-1.09256	56.0879	100.093	29.7481	9.61646	5.09396	24.882
gene-BSU_31050	gbsB	choline dehydrogenase	4.92918	-20.409	-4.46818	-1.85514	1.61887	46.3725	6411.1	612.604	31.2189	9.5429	19.9062
gene-BSU_31060	gbsA	glycine betaine aldehyde dehydrogenase, NAD+-dependent	5.0857	-36.8637	-2.68283	-1.62613	1.69753	24.7692	3879.77	181.386	17.5619	4.97633	12.4942
gene-BSU_31070	gbsR	transcriptional repressor for gbsAB	2.30844	-3.35586	-1.25092	1.91303	1.42556	3.62024	8.81672	4.58607	0.907435	1.99694	6.13448
gene-BSU_32150	paiA	polyamine N-acetyltransferase	1.23097	-2.41835	-1.00243	1.57117	-1.4481	11.8175	18.287	7.19722	2.18361	3.67714	8.98542
gene-BSU_32550	frlP	fructose-amino acid ABC transporter (ATP-binding subunit)	3.58295	-12.1286	-2.95376	1.39255	1.91446	127.278	401.696	67.5755	7.49817	6.95391	32.0581
gene-BSU_32570	frlD	fructoselysine kinase	3.92131	-15.5563	-2.93334	2.29772	1.76472	166	576.05	87.6195	8.75977	16.8929	49.5757
gene-BSU_32580	frlM	fructose-amino acid permease	3.69785	-25.9585	-4.26437	2.77654	2.69273	137.758	469.903	44.1238	3.21943	4.22688	34.4907
gene-BSU_32590	frlN	fructose-amino acid permease	3.48896	-20.8082	-4.84505	2.86234	2.33275	147.244	452.825	57.7231	3.69973	5.47721	42.0641
gene-BSU_32600	frlO	fructose amino acid-binding lipoprotein	3.86493	-16.7818	-6.31612	4.19655	2.11352	356.91	1383.04	185.198	10.9109	19.5506	122.059
gene-BSU_32610	frlB	fructosamine-6-P deglycase	4.10484	-7.32488	-8.98071	3.5266	1.74882	795.399	4614.56	1171.74	47.776	92.0644	457.973
gene-BSU_32760	yusD	conserved protein of unknown function	3.37651	-3.18191	-1.49459	1.60105	-1.26618	291.279	892.981	363.009	98.9759	56.3228	148.689
gene-BSU_32900	yusR	putative 3-oxoacyl-acyl-carrier protein reductase	1.38644	-2.77741	1.18529	-1.20686	1.1581	3.42754	9.04517	2.12841	1.89514	0.444857	2.3488
gene-BSU_33029	spxO	regulator of SpxA degradation	1.14022	-2.1127	1.10426	1.16588	-1.19372	517.063	522.78	239.591	111.388	74.3922	253.36
gene-BSU_33120	liaH	modulator of liaIHGFSR (yvqIHGFEC) operon expression	1.38009	-1.35533	-1.48501	1.3011	3.55153	59.4956	32.4567	43.0037	17.66	15.2895	21.2488
gene-BSU_33700	opuBD	choline ABC transporter (permease)	1.82384	-5.4143	1.50136	1.6254	1.05848	55.3077	468.548	62.4692	43.0512	33.3104	106.02
gene-BSU_33710	opuBC	choline ABC transporter (choline-binding lipoprotein)	1.5955	-6.56292	1.54831	2.10196	-1.12838	38.2486	283.07	24.1092	17.6551	14.5991	75.0475
gene-BSU_33720	opuBB	choline ABC transporter (permease)	1.97903	-9.04845	1.71303	2.42183	-1.05513	41.48	365.502	28.7164	14.767	21.6868	79.9649
gene-BSU_33730	opuBA	choline ABC transporter (ATP-binding protein)	2.01949	-6.30394	1.20209	3.31925	1.13701	15.4382	159.553	17.9271	5.50352	13.0953	76.3723
gene-BSU_33760	sdpB	export step of killing factor SdpC	-1.49129	-2.10455	-2.1452	1.81344	-1.11539	83.5664	69.6468	25.086	3.14297	2.58813	27.4158
gene-BSU_33770	sdpC	precursor of killing factor SdpC	1.61549	-2.86914	-2.12032	1.43351	-1.21448	15174.9	32302.6	13412.7	2336.31	980.299	6666.13
gene-BSU_34480	yvdT	putative transcriptional regulator (TetR/AcrR family)	1.03227	-2.20813	1.18061	-1.44291	2.35109	242.505	238.705	95.3388	67.9834	22.2525	84.9652
gene-BSU_34490	psmA	sodium / proton antiporter subunit A	1.14794	-3.7645	-1.23321	1.03143	1.95315	53.3572	46.245	15.1316	4.69273	5.03443	8.92238
gene-BSU_34500	psmB	sodium-proton two component antiporter subunit	1.1614	-2.80684	-1.08922	-1.62346	2.10371	93.8191	97.8585	38.1423	19.8016	8.37745	12.9713
gene-BSU_34630	mdxR	transcriptional activator of the maltodextrin operon (LacI family)	1.8296	-2.06567	-1.31867	1.63954	-1.76827	43.326	52.9028	30.6588	9.68894	7.29734	17.6884
gene-BSU_35440	yvyF	putative transcriptional regulator of flagella formation	-1.00587	-1.42521	-2.47815	2.67099	-1.07121	70.9557	51.7944	38.2923	10.676	13.9415	34.8964
gene-BSU_35450	comFC	component of the DNA transport apparatus	2.52169	-2.23102	-1.21915	1.59107	-1.09779	26.7543	59.7114	32.2904	12.6081	10.1985	30.8684
gene-BSU_35460	comFB	regulator of competence, pole located	2.86698	-2.49043	-3.20533	2.39041	1.15762	10.8549	24.3206	16.0706	2.82038	2.33662	12.6175
gene-BSU_35470	comFA	ATP-dependent helicase competence protein	4.06698	-2.96638	-1.85226	1.13196	1.04648	16.2121	69.3287	35.7047	8.35387	5.01663	13.6998
gene-BSU_36650	ureB	urease (beta subunit)	2.03113	-2.73557	-1.92921	1.43138	-2.01298	465.08	434.289	419.19	69.3774	51.3543	86.6066
gene-BSU_36660	ureA	urease (gamma subunit)	2.28837	-2.08218	-2.51708	2.06539	-1.86186	42.5303	52.0321	77.9831	10.6915	9.00206	21.9973
gene-BSU_36668	ywzE	conserved protein of unknown function (putative phage interference protein)	3.44097	-3.02858	-1.35366	2.07868	-1.58028	50.5149	87.5541	66.029	12.841	12.3549	32.8055
gene-BSU_37130	spo0F	two-component response regulator of sporulation initiation	-1.08082	-2.80398	1.22428	1.98088	-1.29473	911.079	599.807	266.732	96.9706	163.547	488.106
gene-BSU_37420	albF	putative peptidase involved in subtilosin production	-1.11558	-2.09379	-1.43462	1.0198	-1.25549	115.891	60.6492	29.8077	10.4625	7.34743	15.3419
gene-BSU_37430	albG	putative integral membrane protein involved in subtilosin production and immunity	-1.03515	-2.05805	-1.298	-1.01378	-1.12124	79.9758	50.251	24.5358	8.0719	7.84678	14.8283
gene-BSU_39880	yxbC	conserved protein of unknown function	1.01438	-4.46295	-1.39162	1.4226	1.6292	3620.15	2227.24	850.873	275.397	108.936	504.434
gene-BSU_39890	yxbB	putative S-adenosylmethionine-dependent methyltransferase	-1.02761	-4.97725	-2.5751	1.83174	1.6808	3669.05	2229.59	532.775	117.721	34.9349	263.763
gene-BSU_39900	yxbA	conserved protein of unknown function	-1.01353	-4.68802	-2.74784	2.21886	1.48358	461.597	197.223	78.7806	16.7896	1.92771	29.6091
gene-BSU_39910	yxnB	conserved protein of unknown function	-1.09846	-4.72976	-3.25865	2.62591	1.51293	654.776	323.791	92.3742	19.179	6.82482	43.793
gene-BSU_39920	asnH	asparagine synthetase (glutamine-hydrolyzing)	-1.46875	-4.83372	-2.58836	1.84822	1.4492	1031.29	490.957	101.818	21.9141	7.86677	63.0504
gene-BSU_39930	yxaM	putative efflux transporter	-1.76832	-5.47604	-2.74945	1.67301	1.68509	953.081	338.413	76.2635	15.6855	5.06025	41.7072
gene-BSU_40180	liaD	precursor of exported modified peptide (epipeptide) controlling LiaRS activity	-1.0441	-2.65847	-2.00063	2.12147	-1.14477	4800.73	4608.86	3589.4	504.891	407.133	2312.29
gene-BSU_40300	rapG	response regulator aspartate phosphatase	-1.01436	-2.04638	-1.03482	1.16838	-1.22041	219.496	199.345	89.1125	37.7855	27.4146	74.0227
gene-BSU_40529	yyzH	hypothetical protein	1.85904	-2.31696	1.24257	-1.76828	1.43583	12.5811	16.7982	4.15039	6.89832	1.44579	2.77585
gene-BSU_40980	yyaB	putative antibiotic immunity protein	1.04829	-2.31837	-1.04619	1.68528	-1.78394	93.9657	75.4204	33.4102	10.3911	9.34351	35.3119
gene-BSU_18979	yoyA	putative fragment of phage protein; putative defective prophage 6	-1.70609	1.10732	-2.28296	1.28424	1.76377	28.3074	10.3589	14.1805	4.43463	2.74699	14.1568

## Sheet: cluster 4
Table S4. List of the differentially expressed genes in cluster 4
Gene_ID	Gene_Symbol	Description	fold change					Transcripts per millions mapped reads (TPM)
			10H/8H	12H/10H	15H/12H	18H/15H	24H/18H	8H	10H	12H	15H	18H	24H
gene-BSU_00010	dnaA	chromosomal replication initiator informational ATPase	-2.29426	-1.38974	1.12568	1.14592	-1.07477	80.6253	34.7613	13.9275	6.31997	7.27744	31.795
gene-BSU_00020	dnaN	DNA polymerase III (beta subunit)	-2.58841	-1.46967	1.15733	-1.1036	-1.28777	210.376	89.8267	37.9632	15.2111	12.7412	45.7759
gene-BSU_00110	pdxS	glutamine amidotransferase for pyridoxal phosphate synthesis; pyridoxal 5'-phosphate synthase complex, synthase subunit	-2.32831	-1.53325	1.59166	-1.1315	-1.32398	535.14	245.329	136.353	93.4252	37.6394	167.116
gene-BSU_00120	pdxT	glutamine amidotransferase for pyridoxal phosphate synthesis; pyridoxal 5'-phosphate synthase complex, glutamine amidotransferase subunit PdxT	-2.29404	-1.68822	1.93075	-1.3778	-1.36083	915.773	461.31	187.154	172.666	48.731	228.973
gene-BSU_00480	ridA	aminoacrylate/iminopropionate hydrolase/deaminase	-1.42117	-2.29709	1.46186	1.24032	-1.33174	538.357	386.625	160.306	75.2141	55.307	234.185
gene-BSU_02040	ybdN	putative phage protein; prophage region 1	-1.34555	-2.67076	-1.32773	-1.14063	-1.04131	312.236	223.976	78.7269	27.7954	9.90818	46.4907
gene-BSU_02050	ybdO	putative phage protein; prophage region 1	-4.59299	-2.71046	-1.43931	1.15074	1.21864	136.693	32.7458	8.58099	3.16017	1.6471	7.37885
gene-BSU_02060	ybxG	putative amino acid permease	-1.05989	-2.17687	1.05729	-1.25388	-1.11173	61.4788	65.3666	27.6394	8.65571	4.27803	21.1037
gene-BSU_02120	ybeC	putative H+/amino acid transporter	-5.37048	-1.45415	1.35829	-1.80493	1.05452	104.163	25.7676	10.376	5.26194	2.70415	13.725
gene-BSU_02370	gamR	transcriptional regulator-GlcN6P (GntR family)	-1.50467	-2.00501	1.65212	1.01994	1.08388	18.6584	11.27	4.1035	2.85342	1.89912	8.70394
gene-BSU_02820	rapJ	response regulator aspartate phosphatase	-1.28967	-2.30568	1.29599	1.58697	-1.31342	85.7099	65.5758	28.9455	12.1647	19.29	50.3216
gene-BSU_02900	yceD	putative stress adaptation protein (tellurite resistance)	-2.35539	-1.36921	1.27322	-1.35027	-1.15887	545.288	204.205	85.9317	40.0455	23.7735	134.214
gene-BSU_02910	yceE	putative stress adaptation protein (tellurite resistance)	-2.30921	-1.54026	1.26359	-1.2508	-1.34619	743.13	283.886	100.176	49.529	29.515	147.278
gene-BSU_02920	yceF	putative stress adaptation transporter (tellurite resistance)	-2.38311	-1.8155	1.60912	-1.2953	-1.2436	1133.25	436.557	145.452	69.5816	41.1881	227.233
gene-BSU_02930	yceG	putative toxic compound adaptation protein (tellurite resistance)	-2.20597	-2.05755	1.2354	1.01905	-1.10797	324.952	134.313	32.1437	20.6681	15.3178	60.883
gene-BSU_02940	yceH	putative reactive oxygen species resistance protein	-2.30457	-2.11734	1.59932	-1.12608	-1.11913	309.918	125.217	29.7407	20.3502	14.299	56.2796
gene-BSU_03200	putB	proline oxidase	-3.32212	-1.29462	-1.08494	-1.25541	1.09069	2617.95	656.824	373.627	184.236	86.3191	433.544
gene-BSU_03220	putP	proline permease	-3.1409	-1.38223	1.61772	-1.80195	-1.07158	7141.99	3392.36	1562.38	1251.28	398.811	1534.27
gene-BSU_03230	putR	transcriptional activator of proline degradation operon	-2.27608	-1.67953	-1.29792	-1.12609	1.09475	444.943	168.186	87.9776	38.8289	14.4929	60.7049
gene-BSU_03440	tlpC	methyl-accepting chemotaxis protein (plant colonization)	-4.3883	-3.44881	1.96134	1.86389	-1.83049	47.9461	12.2426	2.1692	2.003	4.20638	2.85323
gene-BSU_03480	srfAA	surfactin synthetase	1.04214	-3.25386	-1.12116	-1.14407	-1.88326	4117.24	7180.83	2192.82	748.714	330.592	492.83
gene-BSU_03490	srfAB	surfactin synthetase	1.17604	-3.2571	-1.11355	-1.12078	-1.7706	6743.75	13574.1	3972.41	1375.39	625.435	985.017
gene-BSU_03520	srfAD	surfactin synthetase	1.14757	-3.73044	1.03592	-1.28092	-1.80537	7953.77	16883	4323.76	1597.71	693.858	1037.35
gene-BSU_03530	srfT	surfactin exporter	-1.42479	-2.81089	1.28462	-1.24408	1.24724	105.099	113.494	33.5719	18.0309	8.94337	24.2972
gene-BSU_03800	pbtN	petrobactin iron-siderophore ABC transporter (permease)	-1.69475	-1.44735	2.10748	-1.97728	-1.11093	127.58	116.315	44.6244	67.0972	21.8008	65.7623
gene-BSU_03940	cutI	putative membrane protein involved in copper intake	-1.50698	-2.06138	1.27364	-1.18564	-1.17605	399.935	99.6965	83.3453	28.6829	14.6694	69.1932
gene-BSU_03950	cutJ	copper import permease subunit	-1.46418	-2.25312	1.43274	-1.27907	-1.01067	239.28	62.2958	44.35	18.1822	7.8958	48.0909
gene-BSU_03981	mtlA	phosphotransferase system (PTS) mannitol-specific enzyme IICB component	-1.43986	-2.42274	2.45562	-1.27067	-1.01188	25.4992	17.067	4.26015	6.75499	2.02229	6.0269
gene-BSU_04050	pxpA	oxoprolinase subunit A	-2.34241	-2.41435	2.24808	-1.32937	-1.05132	103.725	64.4581	18.0977	16.8065	6.61251	22.8093
gene-BSU_04060	pxpG	5-oxoproline transporter	-3.53992	-3.04	1.47359	-1.26727	1.05117	261.005	108.739	21.5206	11.2336	4.03392	22.6181
gene-BSU_04070	pxpI	putative D-5-oxoproline epimerase	-3.05142	-3.60488	1.88958	-1.66683	-1.10502	332.407	154.526	30.4309	18.6527	4.65117	23.1321
gene-BSU_04080	pxpB	L-5-oxoprolinase (ATP-dependent) subunit B	-3.27702	-2.93155	1.48685	-1.16993	-1.2505	213.491	91.6581	24.3972	10.4954	4.37935	17.1619
gene-BSU_04090	pxpC	L-5-oxoprolinase (ATP-dependent) subunit C	-3.0475	-3.00449	1.63376	-1.3326	-1.11563	227.548	106.072	25.0135	13.6383	4.94837	21.4798
gene-BSU_04100	pxpR	transcriptional regulator of the pxp operon (IclR family)	-2.86777	-2.94991	1.4158	-1.22658	-1.21906	267.222	147.458	29.0748	13.4799	6.68172	23.9984
gene-BSU_04460	dctR	two-component response regulator	-1.663	-2.53718	1.83701	1.11339	-1.27394	26.326	21.3369	6.09456	4.26894	4.39468	9.66046
gene-BSU_05000	yddK	ICEBs1 mobile element: conserved protein of unknown function	-2.5919	-1.40876	-1.69452	1.77215	-1.47093	31.0207	12.1635	4.53383	1.47636	1.57033	6.54976
gene-BSU_05440	cesA	carboxylesterase NP	-1.27993	-2.06002	-1.04011	1.07131	1.06087	92.9125	70.2249	37.1146	14.8967	9.75064	37.8106
gene-BSU_05580	ydgC	putative transcriptional regulator	-1.37795	-3.20437	1.285	-1.44593	1.72681	383.263	240.117	81.1727	60.1675	14.8267	88.2325
gene-BSU_05590	ydgD	conserved hypothetical protein	-1.32572	-3.26701	1.27012	-1.37827	1.58179	444.668	311.131	91.7297	73.2678	18.7323	98.7238
gene-BSU_06180	pspA	phage shock protein A homolog regulator; prophage region 3	-2.46299	-2.6225	-1.14733	-1.02104	-1.18827	147.147	58.6954	18.0518	2.23317	1.90235	15.2185
gene-BSU_06190	ydjG	putative phage replication protein; prophage region 3	-3.02369	-3.89237	1.36985	-1.3408	1.40886	99.1709	36.92	6.27009	1.29668	0.507293	10.795
gene-BSU_06200	ydjH	conserved hypothetical protein; prophage region 3	-3.6725	-3.61793	-1.71956	1.87694	1.32114	77.2955	22.3976	2.44141	0.901741	0.850462	8.49084
gene-BSU_06210	ydjI	putative phage protein	-3.96712	-2.93986	-1.0248	1.22648	-1.07119	212.92	52.3647	11.1019	4.05545	4.19456	15.2501
gene-BSU_06230	iolT	myo-inositol transporter	-2.40682	-3.87932	1.34139	-1.51509	1.66307	436.069	51.3868	22.0362	16.4939	6.89341	16.1046
gene-BSU_06240	bdhA	acetoin reductase/2,3-butanediol dehydrogenase	-2.59652	-2.70448	2.58829	-1.3447	-1.60574	2339.69	947.217	229.249	136.65	64.8312	435.897
gene-BSU_06310	gabP	gamma-aminobutyrate (GABA) permease; proline permease	-2.11998	-2.1496	1.71795	-1.45154	-1.14146	557.616	235.949	84.7004	56.158	24.24	124.618
gene-BSU_06860	yezE	putative transcriptional regulator (TetR family)	-1.18501	-2.84473	1.3804	-1.91582	2.01278	169.226	109.404	55.3386	30.9119	10.7507	29.0397
gene-BSU_07150	hmoA	heme-degrading monooxygenase	-1.70297	-1.6528	2.83148	-2.0771	-1.31304	208.963	182.879	73.2983	183.835	69.1059	56.7904
gene-BSU_07350	vdhT	vanillin dehydrogenase	-7.90317	-6.14869	1.81323	-1.72105	-1.67264	658.985	108.128	14.8025	3.14297	1.87417	9.76689
gene-BSU_07360	yfmS	chemotaxis sensory transducer (sensed target unknown)	-8.3775	-5.17979	1.66608	-1.55758	-1.92633	701.932	119.597	16.992	4.29213	2.77067	10.7359
gene-BSU_07370	ettA	putative energy-dependent translational throttle A	-2.24459	-1.58644	1.91718	-1.17793	-1.30648	67.0241	37.7292	16.36	5.57914	6.24212	30.7547
gene-BSU_07590	citT	two-component response regulator	-1.23649	-2.42479	1.71139	1.23259	-1.07223	82.9039	67.8341	20.5691	14.1092	9.80841	47.9354
gene-BSU_08380	yfiS	putative efflux transporter	-1.50822	-1.68219	1.00574	-2.04538	-1.0779	79.2587	60.2805	35.0831	16.0709	4.01223	11.555
gene-BSU_08390	bstA	bacillithiol S-transferase	-1.67147	-2.0195	1.83914	-1.23245	-1.04465	179.667	122.467	53.5223	38.1711	21.5656	64.8216
gene-BSU_08960	yhbF	conserved protein involved in sporulation	1.01818	-2.41924	1.39598	-2.1419	2.17597	54.3092	38.911	21.2503	21.0875	4.53339	10.9387
gene-BSU_09370	lytF	gamma-D-glutamate-meso-diaminopimelate muropeptidase (major autolysin, vegetative)	-5.48115	-4.97892	1.25464	-1.06946	-1.09888	267.894	62.7498	8.34606	3.52675	2.39486	10.1611
gene-BSU_09610	crcBB	subunit of fluoride efflux transporter	-1.2647	-2.01025	1.33696	1.24506	-1.08152	36.3374	33.9357	14.1491	7.59014	10.4053	21.0292
gene-BSU_10020	serC	phosphoserine aminotransferase	-2.28803	-1.81927	1.95961	-1.11175	-1.22615	249.292	94.6453	37.0846	21.8082	15.0201	79.7287
gene-BSU_10170	fabHB	beta-ketoacyl-acyl carrier protein synthase III 2	-1.58809	-2.60887	-2.05138	-1.0294	1.09387	118.993	153.983	60.1553	8.31305	3.76968	15.5822
gene-BSU_10220	gltT	proton/sodium-glutamate (aspartate) symport permease	-2.74482	-2.92242	1.55846	-1.28207	1.26851	1166.8	597.442	147.516	57.4096	45.559	377.71
gene-BSU_10450	yhjB	putative Na+/metabolite cotransporter	-1.33731	-2.45838	-1.26357	-1.15546	1.26702	125.115	62.9646	27.8811	12.5698	5.10451	20.5073
gene-BSU_10620	addB	ATP-dependent deoxyribonuclease (subunit B)	-2.38493	-1.5301	1.96591	-1.56174	-1.30193	47.5024	28.1649	10.5212	6.13634	4.13789	16.3887
gene-BSU_10630	addA	ATP-dependent deoxyribonuclease (subunit A)	-2.09135	-1.67964	1.84616	-1.35423	-1.23345	94.2772	52.588	21.1503	12.455	8.73569	33.792
gene-BSU_10640	sbcD	DNA repair exonuclease	-1.86796	-1.7807	2.0342	-1.2175	-1.43214	77.6287	52.7086	15.7934	10.6424	7.96657	31.0159
gene-BSU_10770	wprA	cell wall-associated protease	-1.18446	-1.60799	2.7078	-1.17637	-3.03226	1994.08	2196.4	714.842	781.369	349.185	790.792
gene-BSU_11390	appB	oligopeptide ABC transporter (permease)	-1.63077	-2.51609	1.01555	1.11544	-1.48421	1601.99	767.576	236.978	130.308	80.4075	195.973
gene-BSU_11400	appC	oligopeptide ABC transporter (permease)	-1.51553	-2.59473	1.15869	-1.13899	-1.49433	2075.46	1069.78	392.513	198.121	94.8797	251.744
gene-BSU_11430	oppA	oligopeptide ABC transporter (binding lipoprotein)	-1.6385	-2.43326	1.77074	-1.13849	-1.56151	4810.93	3216.68	731.26	505.762	167.616	1038.96
gene-BSU_11440	oppB	oligopeptide ABC transporter (permease)	-1.88041	-2.69024	1.85438	-1.23901	-1.5434	1459.31	981.15	170.827	132.449	55.7925	325.896
gene-BSU_11450	oppC	oligopeptide ABC transporter (permease)	-1.94499	-2.92496	1.92177	-1.30865	-1.58396	1355.84	835.883	148.18	103.969	44.8855	257.265
gene-BSU_11460	oppD	oligopeptide ABC transporter (ATP-binding protein)	-1.67576	-2.95513	2.19974	-1.60046	-1.64623	1904.24	1558.94	321.396	215.029	80.6257	448.466
gene-BSU_11470	oppF	oligopeptide ABC transporter (ATP-binding protein)	-1.7794	-2.91641	2.37617	-1.6353	-1.6942	2924.53	2157.23	489.638	344.111	124.262	629.465
gene-BSU_11720	fabI	enoyl-acyl carrier protein reductase	-2.00153	-1.83957	-1.07338	-1.34722	-1.22246	872.538	911.901	408.897	81.8058	54.0355	223.354
gene-BSU_11900	yjcL	putative integral inner membrane protein; possibly aquaporin-related	-1.60062	-2.44693	-1.48302	1.21802	1.2591	41.3955	18.9702	9.1476	1.69624	2.00298	9.08969
gene-BSU_11910	yjcM	conserved hypothetical protein; phage island	-6.41105	-3.64524	1.608	1.06758	1.0873	101.774	29.8407	4.72403	1.16174	0.987365	12.1867
gene-BSU_11940	yjcP	conserved hypothetical protein: phage island	-2.85359	-2.25814	-1.63638	2.33487	1.19155	12.1692	4.33286	1.85285	0.586592	0.516352	2.31321
gene-BSU_11950	yjcQ	conserved hypothetical protein; phage island	-4.68741	-4.09863	1.40107	1.63067	-1.3847	25.9347	8.84115	1.82035	1.38312	1.67407	3.21414
gene-BSU_12100	pdaC	N-acetylmuramic acid deacetylase	-2.16651	-1.72959	1.10337	-2.01418	1.41082	20.554	7.11889	3.03003	1.96533	0.463393	2.55046
gene-BSU_12120	yjfB	conserved hypothetical protein	-2.7494	-1.95214	-2.57922	-1.18306	-1.51685	929.539	358.461	175.404	34.0223	21.6868	24.2887
gene-BSU_12920	dppA	D-alanyl-aminopeptidase	-1.24446	-3.30101	1.17036	1.02712	1.10245	1595.79	904.964	317.568	141.789	53.2049	336.332
gene-BSU_12930	dppB	dipeptide ABC transporter (permease)	-1.31325	-3.53124	1.04486	1.15259	1.14031	1624.04	818.526	278.708	119.65	44.7304	291.06
gene-BSU_12940	dppC	dipeptide ABC transporter (permease)	-1.29808	-3.28353	1.06715	-1.0411	1.33702	1248.39	610.7	219.264	94.5052	31.1227	218.09
gene-BSU_13630	ykvA	conserved hypothetical protein	-1.04514	-2.09584	1.02903	1.21308	-1.1566	76.4271	81.636	36.2028	16.7316	12.0257	40.9892
gene-BSU_13680	motB	motility protein B; MotB component of the H+-coupled stator flagellum complex	-5.54459	-2.39358	-1.11478	-1.04146	-1.44093	340.337	52.3607	21.1216	5.07782	3.42132	10.5949
gene-BSU_13690	motA	motility protein A; MotA component of the H+-coupled stator flagellum complex	-6.58139	-4.20455	-1.02187	-1.47567	-1.10698	188.697	25.9308	6.3813	2.42429	0.80025	3.89234
gene-BSU_13950	mcpC	methyl-accepting chemotaxis protein	-5.51216	-4.42092	-1.08675	-1.22546	1.34207	25.0519	5.63354	1.00175	0.275412	0.176315	1.05787
gene-BSU_14010	cheV	coupling protein and response regulator for CheA activity in response to attractants (chemotaxis)	-2.68483	-2.17081	1.01645	2.34365	-1.70264	197.959	81.7806	35.8381	18.1535	35.5264	31.137
gene-BSU_14750	ylaE	putative exported protein	-1.45062	-2.33646	-1.0971	-1.31771	1.28415	28.0093	29.6438	7.96849	3.78409	1.7718	7.61999
gene-BSU_14820	ylaL	conserved hypothetical protein	-1.82569	-2.11873	1.72747	-1.67663	-1.39474	633.26	491.675	135.358	110.714	45.0692	128.683
gene-BSU_14860	pycA	pyruvate carboxylase	-1.25196	-3.23019	-1.08059	1.26727	-1.258	986.01	600.802	275.218	84.2384	78.3668	195.421
gene-BSU_14880	ctaB	protoheme IX farnesyltransferase 2	-1.43182	-1.35602	1.26909	-2.0692	-1.13785	684.044	362.954	255.896	213.197	57.0754	163.92
gene-BSU_15100	ylbP	putative acetyltransferase	-1.64756	-3.1399	1.302	1.25411	1.15982	1505.56	622.193	260.796	129.56	77.7671	326.033
gene-BSU_15570	cysH	(phospho)adenosine phosphosulfate reductase	-1.48505	-2.09496	1.50882	-1.20035	1.21945	86.8085	74.4193	40.4989	27.0233	13.1604	39.977
gene-BSU_15580	cysP	sulfate permease	-1.48514	-2.48695	1.74117	-1.20284	1.02087	89.6327	101.026	40.4323	32.6641	13.847	41.2859
gene-BSU_15590	sat	sulfate adenylyltransferase	-2.52849	-2.1113	1.23995	1.10588	-1.21633	75.0731	82.602	33.9545	21.5706	12.3439	31.5273
gene-BSU_15600	cysC	adenylylsulfate kinase	-2.6664	-2.33925	1.22649	1.14299	-1.29309	80.8821	87.9501	35.46	20.4892	12.8514	31.4036
gene-BSU_15610	sumT	uroporphyrinogen III and precorrin-1 C-methyltransferase	-2.62632	-2.25833	1.13332	1.25785	-1.25716	68.4725	70.1009	26.007	17.3158	11.0395	25.2839
gene-BSU_15960	ylqB	conserved exported protein of unknown function	-6.0416	-5.49249	-1.22877	-1.57832	-1.37625	2030.35	426.349	64.2628	17.4384	4.55155	29.9861
gene-BSU_16060	rnhB	ribonuclease HII	-3.29658	-1.50468	-1.32358	-1.10879	1.14963	59.4857	20.9977	9.9977	3.84951	2.31551	6.5059
gene-BSU_16090	sucC	succinyl-CoA synthetase (beta subunit)	-3.3407	-1.96367	1.42115	-1.96698	-1.54377	4111.46	1487.18	293.001	199.563	84.9118	321.452
gene-BSU_16100	sucD	succinyl-CoA synthetase (alpha subunit)	-3.33504	-1.86687	1.51226	-2.01286	-1.76306	2374.71	833.956	212.576	131.287	57.303	178.171
gene-BSU_16110	dprA	DNA processing Smf single strand binding protein	-1.47773	-2.35391	-1.07903	-1.21038	-1.12055	154.097	93.0101	29.5959	17.3615	9.02403	23.3805
gene-BSU_16180	flgB	flagellar component of cell-proximal portion of basal-body rod	-4.73474	-3.15328	1.52248	-2.05461	2.5666	43.5499	6.46084	2.12841	0.758057	0.222428	4.91112
gene-BSU_16210	fliF	flagellar basal-body M-ring protein	-10.0219	-4.00718	1.80753	-1.37492	1.96959	177.129	19.0817	2.31866	1.37636	0.969241	11.0621
gene-BSU_16310	fliM	flagellar motor switching and energizing component	-12.1535	-3.17035	1.73553	-1.572	1.28747	446.367	40.2719	3.84296	3.0087	1.73668	13.6709
gene-BSU_16320	fliY	flagellar motor switching and energizing phosphatase	-12.6664	-4.91236	2.22446	-1.00435	-1.15652	332.577	30.7302	2.3727	1.38677	1.48775	9.22843
gene-BSU_16450	cheC	signal terminating phosphatase of CheR-mediated methylation of methyl-accepting chemotaxis proteins (MCPs)	-9.32461	-2.36877	-1.12827	1.09115	-1.17914	446.079	57.0605	11.3642	3.12849	2.82272	11.5
gene-BSU_16460	cheD	sequence specific deamidase required for methylation of methyl-accepting chemotaxis proteins (MCPs) by CheR	-9.33479	-3.01429	1.21288	-1.33721	1.12742	437.104	54.3175	8.28422	3.14722	0.86574	12.134
gene-BSU_17010	miaB	enzyme for ms(2)i(6)A formation for tRNA modification	-2.45954	-1.13793	-1.42578	1.2553	-1.2733	837.71	268.441	213.216	63.2829	41.5592	117.62
gene-BSU_17230	pksS	cytochrome P450 of bacillaene metabolism	-2.04698	-1.1166	1.33251	-1.27063	-1.95682	224.145	149.225	61.6766	27.1046	17.4847	70.08
gene-BSU_17460	glnA	glutamine synthetase	-1.60031	-2.46265	-1.3292	-1.27019	-1.13117	3289.04	1735.12	690.256	229.833	100.555	265.796
gene-BSU_17690	yncM	conserved exported protein	-1.81587	-2.20615	1.55702	-1.29941	-1.2518	1487.59	854.546	275.401	212.974	80.448	303.155
gene-BSU_18000	citB	aconitate hydratase (bifunctional aconitase)	-2.09723	-3.24765	-1.05657	-1.09583	1.55618	3810.73	1890.16	479.918	150.546	83.6331	363.271
gene-BSU_18010	yneN	putative membrane-bound proteins with a thioredoxin-like domain	-1.89855	-2.80173	-1.1849	1.14906	1.20233	701.094	387.373	112.659	34.9622	29.5075	75.646
gene-BSU_18120	alsT	H+/Na+:nitrogen-donor aminoacid symporter	-3.15853	-1.44939	1.03029	1.18695	-1.29148	59.2831	26.495	9.64863	4.51147	5.05715	16.9768
gene-BSU_18310	ppsD	nonribosomal plipastatin synthetase D involved in synthesis of plipastatin	-2.06351	-1.53428	1.13424	-1.00906	-1.15224	403.776	222.748	60.4882	38.3863	18.6901	125.892
gene-BSU_18440	gltB	glutamate synthase (small subunit, NADP-dependent)	-2.87315	-1.59089	-1.38745	-1.44468	1.3648	535.619	108.134	67.773	36.3402	10.419	21.4089
gene-BSU_18450	gltA	glutamate synthase (large subunit, NADP-dependent)	-2.58312	-1.23251	-1.08829	-1.86938	1.86009	321.161	68.4186	56.8485	40.6781	9.37241	19.8014
gene-BSU_18990	rttM	antitoxin inhibiting Rnase RttL	-1.63654	-1.53119	-1.26421	2.00705	-1.21399	12.677	6.22155	3.84296	1.5029	1.98441	8.70856
gene-BSU_19070	yobS	putative transcriptional regulator	-1.65615	-2.00629	1.18082	-2.71844	4.19002	23.2073	18.5188	7.38569	4.27723	0.677712	9.39742
gene-BSU_19080	yobT	putative metal-dependent hydrolase	-1.35828	-2.65283	1.30086	-1.75024	2.4748	30.1309	30.7488	10.1986	7.86133	1.48286	10.2019
gene-BSU_19360	odhB	2-oxoglutarate dehydrogenase complex (dihydrolipoamide transsuccinylase, E2 subunit)	-1.7549	-2.64353	1.71025	1.05037	-1.41343	4268.37	3364.59	752.797	492.265	261.141	1013.52
gene-BSU_19370	odhA	2-oxoglutarate dehydrogenase (E1 subunit)	-1.85198	-2.52493	1.67462	1.00886	-1.36791	3462.9	2626.65	553.532	370.274	209.31	904.252
gene-BSU_19410	cwlS	peptidoglycan hydrolase (cell wall-binding d,l-endopeptidase)	-1.4868	-2.07358	-1.16855	1.28909	-1.67541	1192.61	863.656	225.688	96.9643	79.013	235.245
gene-BSU_19480	yojE	putative N-acetylated toxic metabolites	-2.00029	-1.57822	1.39499	-1.44378	-1.33675	77.4044	77.7173	27.2991	14.1174	7.785	30.7293
gene-BSU_19520	yojA	putative H+/anion permease	-2.22363	-2.34371	1.90327	-1.18688	1.31327	71.7404	26.1724	12.047	8.41528	5.65318	13.9728
gene-BSU_20420	yorD	stress protein SCP1; phage SPbeta	-4.97525	-4.90885	1.40649	1.1207	-1.30539	976.031	215.71	41.504	11.7318	7.43547	65.563
gene-BSU_20850	aimP	arbitrium lysis /lysogeny regulatory peptide; phage SPbeta	-2.12378	-1.94554	-2.22113	-1.17977	-1.54328	147.278	77.325	60.9383	7.82122	1.37694	7.93101
gene-BSU_20880	yopI	conserved protein of unknown function; phage SPbeta	-1.96638	-1.45612	-2.31926	2.3613	-1.13641	19.2898	7.54974	5.6349	0.64591	1.05591	3.43083
gene-BSU_20930	yopD	conserved membrane protein of unknown function; phage SPbeta	-1.95525	-1.30437	-1.64492	2.20347	-1.48811	68.5049	38.814	17.0313	6.71914	10.0767	20.8189
gene-BSU_20990	yonU	conserved protein of unknown function; phage SPbeta	-1.20712	-3.91197	1.78019	1.01806	1.09916	26.6266	26.6638	8.23491	5.47485	1.14745	16.7432
gene-BSU_21010	yonS	putative hydrolase lipoprotein; phage SPbeta	-3.6208	-1.57979	-1.09852	1.08319	-1.80683	59.2307	21.2722	10.3421	2.97897	2.33877	7.61999
gene-BSU_21480	sunA	sublancin 168 lantibiotic antimicrobial precursor peptide; SPBeta prophage	-2.64722	-1.71618	-1.16734	2.12446	-1.20806	177.496	46.6616	50.363	10.0853	3.8047	81.3276
gene-BSU_21540	yolA	conserved exported protein of unknown function; SPbeta phage	-5.35553	-2.03107	-1.42435	2.03608	-1.35705	686.683	126.884	52.3234	14.2136	17.7016	62.2787
gene-BSU_21830	ypjQ	putative phosphatidylglycerophosphatase	-1.68784	-2.10526	1.13917	1.19905	-1.31318	300.243	196.922	93.4616	33.495	33.2206	105.42
gene-BSU_22090	kdgT	2-keto-3-deoxygluconate permease	-1.61759	-2.20542	2.01313	-1.01978	-1.17559	65.7244	72.0647	28.4216	19.6003	18.8695	34.9707
gene-BSU_22100	kdgA	2-keto-3-deoxygluconate-6-phosphate aldolase	-1.64608	-2.49752	1.86691	-1.00107	-1.32299	62.6659	79.301	19.6635	16.4246	15.4119	28.1812
gene-BSU_22110	kdgK	2-keto-3-deoxygluconate kinase	-1.37529	-2.07905	1.16465	-1.23114	-1.02943	42.4208	54.0988	21.4969	8.99561	4.13717	15.2885
gene-BSU_22120	kdgR	transcriptional repressor of the Kdg operon (KdgR-galacturonate)	-1.33125	-2.12445	1.25326	-1.17007	1.11472	52.1128	58.3819	18.3106	10.9175	4.20979	22.5334
gene-BSU_22130	kduI	4-deoxy-L-threo-5-hexosulose-uronate ketol-isomerase, 5-keto-4-deoxyuronate isomerase	-1.24646	-1.43395	1.63271	-2.24714	1.03764	116.428	157.331	74.8124	92.2989	18.439	47.4711
gene-BSU_22140	kduD	2-keto-3-deoxygluconate oxidoreductase	-1.30352	-1.45251	1.78525	-2.28951	1.06051	94.2552	113.086	55.4742	71.946	14.061	32.1128
gene-BSU_23960	artR	high affinity arginine ABC transporter (ATP-binding protein)	-1.6868	-2.67438	1.19619	-1.94832	1.7814	1268.33	1062.96	404.42	267.427	97.0656	229.094
gene-BSU_23970	artQ	high affinity arginine ABC transporter (permease)	-1.97408	-2.1577	1.06132	-1.68369	1.68614	563.289	387.631	144.792	94.5159	37.2618	103.211
gene-BSU_23980	artP	high affinity arginine ABC transporter binding lipoprotein	-2.31731	-2.09249	1.07416	-1.40342	1.59307	1074.74	685.488	263.048	155.263	87.7072	244.73
gene-BSU_24530	lipM	protein octanoyltransferase	-1.96932	-1.35247	-2.04751	1.12601	-1.19827	124.383	82.6864	37.1899	7.35868	6.37389	26.0671
gene-BSU_26190	yqaT	putative phage-related terminase large subunit; skin element	-2.81402	-1.17936	-1.34238	-1.55307	1.66661	6.97735	2.26827	1.20093	0.646337	0.200803	0.385535
gene-BSU_26210	yqaR	hypothetical protein; skin element	-5.49989	-2.85518	1.22662	-1.2575	-1.01104	40.0768	8.30878	2.45453	0.529825	0.373106	2.50722
gene-BSU_26230	yqaP	conserved phage protein of unknown function; skin element	-2.58172	-3.68044	1.11848	1.63472	-1.0759	371.852	156.693	33.2478	9.3779	6.85582	65.725
gene-BSU_26860	yraO	putative citrate transporter	-2.22485	-2.08992	-1.03934	1.48434	-1.05448	55.287	25.8924	7.56336	4.30256	3.45803	11.1287
gene-BSU_26870	yraN	putative transcriptional regulator (probes citrate or citrate-related metabolite)	-2.17376	-1.91453	-1.17444	1.6333	-1.1084	21.4204	11.0057	2.26602	1.246	0.797675	4.0202
gene-BSU_28420	ysmA	conserved protein of unknown function	-1.80103	-2.03672	1.03553	1.29543	-1.16421	88.7263	55.0481	21.7335	10.6538	6.83817	26.6332
gene-BSU_28430	sdhB	succinate dehydrogenase (iron-sulfur protein)	-2.33209	-3.56084	1.82528	1.0748	-1.35862	1732.06	960.384	193.903	94.5382	66.1987	307.092
gene-BSU_28440	sdhA	succinate dehydrogenase (flavoprotein subunit)	-2.75723	-3.1688	1.83427	-1.05184	-1.40255	1452.07	720.719	139.348	64.8588	48.2011	246.091
gene-BSU_28450	sdhC	succinate dehydrogenase (cytochrome b558 subunit)	-3.52377	-2.13311	1.59726	1.0301	-1.26641	692.062	264.661	69.6844	34.791	23.859	154.108
gene-BSU_28710	cstA	carbon starvation-induced membrane protein	-1.74179	-2.06006	2.18091	-1.51042	1.27848	345.157	257.815	107.398	91.8569	38.1118	131.054
gene-BSU_29120	mdh	malate dehydrogenase (NAD-dependent)	-1.90546	-3.53098	1.30244	-1.40121	-1.02918	7513.47	4284.52	914.943	414.812	136.865	689.263
gene-BSU_29130	icd	isocitrate dehydrogenase	-1.95629	-3.83855	1.23091	-1.29619	-1.02045	8831.66	4859.26	785.133	418.439	137.486	767.026
gene-BSU_29140	citZ	citrate synthase II	-1.80921	-4.73208	1.53195	-1.54713	1.47535	13748.2	7781.35	1646.06	1097.94	321.174	1310.83
gene-BSU_29430	ytzD	conserved protein of unknown function	-1.3735	-3.03946	-1.07123	-2.42436	1.74507	83.6084	46.4253	21.4525	11.2269	2.74516	6.6761
gene-BSU_29440	argH	argininosuccinate lyase	-1.27528	-4.96332	-1.11571	-1.86271	1.48131	6508.56	4686.34	1292.66	766.302	221.155	485.894
gene-BSU_29450	argG	argininosuccinate synthase	-1.41392	-4.30275	1.09766	-1.9764	1.45999	5937.28	3960.67	1175.77	811.349	254.766	508.173
gene-BSU_29540	ppnKB	inorganic polyphosphate/ATP-NAD kinase	-1.29041	-2.8123	-1.07981	-1.06891	-1.64732	1192.58	702.013	282.759	76.791	39.5433	114.245
gene-BSU_29680	acsA	acetyl-CoA synthetase	-1.13639	-2.90368	1.60457	-1.08646	-1.09339	1480.92	1109.91	458.62	237.855	112.332	367.982
gene-BSU_30150	rmgR	membrane bound transcriptional regulator (controlling rhamnogalacturonan degradation)	-1.43784	-2.04076	1.08966	1.17713	-1.03104	54.9981	34.4077	13.0203	7.56422	5.14348	19.176
gene-BSU_30530	ytnA	putative amino acid permease	-2.39301	-1.84633	1.90468	-1.13325	-1.69047	193.529	126.952	41.8916	26.9731	17.6672	67.6016
gene-BSU_30540	asnB	meso-diaminopimelic acid amidotransferase (asparagine synthetase)	-2.28004	-1.42687	2.14641	-1.18158	-1.98746	201.652	158.915	71.0856	36.2742	29.9892	103.185
gene-BSU_30670	luxS	S-ribosylhomocysteine lyase	-1.51166	-2.01271	-1.1758	1.49871	-1.29707	118.943	79.2066	49.472	14.3455	15.5559	44.8002
gene-BSU_31260	mcpB	methyl-accepting chemotaxis protein	-6.19341	-1.84574	-1.37111	1.0099	-1.0432	155.405	27.4902	11.5289	4.58302	3.27101	4.73109
gene-BSU_31450	kinB	two-component sensor potassium-binding histidine kinase	-1.63239	-2.46924	1.00333	1.13052	-1.56673	44.3563	28.7148	9.83582	3.216	1.44915	7.05286
gene-BSU_31540	nupN	lipoprotein involved in guanosine transport	-2.69197	-2.69951	2.26709	-1.25647	1.59314	1292.98	296.223	97.9954	128.705	22.0482	255.224
gene-BSU_31550	nupO	guanosine ABC transporter (ATP-binding protein)	-2.59199	-3.34384	2.00337	-1.07963	1.05694	491.692	124.644	32.9622	28.1885	9.30848	71.9223
gene-BSU_31560	nupP	permease of ABC guanosine transporter	-2.82853	-3.18712	2.12201	-1.08231	1.10945	506.712	130.118	32.2082	32.0961	13.795	78.6624
gene-BSU_31570	nupQ	permease of ABC guanosine transporter	-2.93008	-3.64152	2.61098	-1.22913	1.07563	595.963	151.096	33.83	39.9836	17.8464	85.2707
gene-BSU_33260	yvrN	putative ABC transporter (ATP-binding protein)	-2.27149	-2.0086	1.96841	-1.27931	-1.50031	342.847	240.091	76.3437	38.2172	28.3515	126.944
gene-BSU_33270	yvrO	putative ABC transporter (ATP-binding protein)	-2.01276	-2.02971	1.53093	-1.02277	-1.41495	195.212	126.838	44.9626	15.0678	13.3892	68.9136
gene-BSU_33280	yvrP	putative ABC transporter membrane fusion component	-2.10697	-1.42806	1.18658	1.0734	-1.23263	98.7177	63.5208	26.331	7.71707	7.51954	46.5199
gene-BSU_33290	fhuC	ferrichrome ABC transporter (ATP-binding protein)	-1.95351	-1.31364	2.21785	-2.27469	-1.05761	86.7861	107.84	40.9916	64.6033	23.5074	33.2074
gene-BSU_33300	fhuG	ferrichrome ABC transporter (permease)	-2.0618	-1.2566	1.92953	-1.9867	-1.08217	39.5103	55.0801	22.3735	27.5855	12.4415	16.4739
gene-BSU_33310	fhuB	ferrichrome ABC transporter (permease)	-1.77636	-1.71391	2.4352	-2.01242	-1.19237	33.9716	40.5774	10.4209	19.6242	8.93758	12.4012
gene-BSU_33320	fhuD	ferrichrome ABC transporter (ferrichrome-binding lipoprotein)	-1.83089	-1.24414	1.46015	-2.37201	-1.00434	147.31	121.822	49.0342	67.4135	16.2422	29.3397
gene-BSU_33370	yvgK	putative molybdate binding regulator	-1.33661	-1.05276	1.374	-2.05625	1.06844	89.9132	69.2223	59.0995	35.8258	10.4808	36.2029
gene-BSU_33430	cysI	assimilatory sulfite reductase (hemoprotein beta-subunit)	-2.04962	-1.99705	1.4432	-2.17778	-1.00461	810.053	535.271	268.288	140.844	39.0008	154.516
gene-BSU_33630	secG	preprotein translocase subunit	-1.23752	-2.10374	1.84026	-1.08696	-1.28213	949.367	769.008	424.023	319.532	131.247	345.359
gene-BSU_33870	yvbI	conserved protein of unknown function	-3.18901	-5.31423	3.26745	-1.0452	-1.03318	35.4349	11.1748	1.33596	1.48033	0.620509	6.79071
gene-BSU_33880	yvbJ	conserved protein of unknown function	-4.05123	-2.46601	1.41332	-1.19814	-1.10908	37.456	15.1535	3.0249	1.16544	0.286294	4.58061
gene-BSU_34020	yvbX	putative epimerase modification of peptidoglycan	-2.96247	-2.30497	1.21734	1.08399	1.09263	93.0665	34.9759	8.22059	5.61768	2.80776	16.816
gene-BSU_34030	lutC	component of an iron-sulfur oxidase for L-lactate utilization	-1.94233	-1.99793	2.39681	-1.36136	-1.16872	4982.83	3440.84	1234.5	1068.01	412.859	1910.16
gene-BSU_34040	lutB	component of an iron-sulfur oxidase linked to L-lactate utilization	-1.93088	-1.81809	2.30857	-1.25677	-1.18615	3114.69	1992.51	834.186	640.558	274.79	1420.66
gene-BSU_34160	ganS	polygalactose / cyclodextrin-binding lipoprotein	-1.71102	-3.21497	-1.07097	-1.06677	-1.09452	177.511	88.6349	19.6701	8.87394	5.55017	14.2739
gene-BSU_34190	lutP	L-lactate permease	-3.47828	-2.85452	2.81924	-1.40186	-1.36982	3749.09	1288.46	299.199	171.817	98.539	657.985
gene-BSU_34700	psdA	lantibiotic ABC transporter (ATP-binding protein)	-1.61498	-1.41005	1.33343	1.60174	-2.23295	47.9855	35.5346	15.697	9.09668	20.7971	19.2174
gene-BSU_35319	yvzG	conserved protein of unknown function	-7.2956	-2.06072	-2.31495	1.42541	-1.20706	817.312	114.876	23.3322	4.56238	3.78658	18.5057
gene-BSU_35320	fliT	flagellar assembly protein FliT involved in control of flagella expression	-6.14028	-2.56486	-1.21773	-1.01598	-1.53418	911.852	163.561	34.2832	11.2379	7.48257	17.7752
gene-BSU_35330	fliS	flagellar assembly protein FliS	-5.11048	-3.74667	-2.20809	1.57609	-2.30822	528.71	113.033	12.1311	2.08371	2.48157	6.83605
gene-BSU_35340	fliD	flagellar hook-associated capping protein 2 (HAP2)	-6.18149	-2.53253	-2.03301	1.15557	-1.5875	601.004	110.978	21.0708	3.78522	3.24505	12.8501
gene-BSU_35360	hag	flagellin protein	-6.40637	-4.14804	-1.7307	-1.15659	-2.14301	35369.9	5277.66	792.544	190.902	91.914	221.158
gene-BSU_35390	yviE	conserved protein of unknown function	-1.76952	-1.4126	-2.15213	1.23849	1.0094	34.8109	17.6439	11.5289	1.96753	1.12952	4.771
gene-BSU_35400	flgL	flagellar hook-filament junction protein	-2.89081	-3.07678	-1.39042	1.56462	-1.52597	653.774	209.65	67.6695	16.2598	14.8447	42.7983
gene-BSU_35410	flgK	flagellar hook-filament junction	-2.3291	-2.64171	-1.76862	1.72737	-1.31855	356.319	137.835	49.7013	8.98825	10.7011	31.6928
gene-BSU_35420	flgN	factor required for flagellar based motility	-1.8731	-2.03838	-1.603	1.60992	-1.26747	253.64	108.858	53.0615	17.2407	23.7073	26.2068
gene-BSU_35620	lytC	N-acetylmuramoyl-L-alanine amidase (major autolysin)	-7.89223	-3.12428	-1.57911	1.30444	-1.14274	164.277	26.3633	4.5234	0.793138	1.16361	3.40698
gene-BSU_35630	lytB	modifier of major autolysin amidase LytC	-7.15603	-3.59507	-2.24324	2.20364	1.13046	71.021	11.1036	2.25352	0.372228	0.2867	2.47703
gene-BSU_35650	tagU	teichoic acid-peptidoglycan tethering enzyme (LCP component) with transcription regulator domain of major autolysin expression	-2.08831	-1.66617	1.2575	1.17288	-1.11645	240.932	121.472	56.8933	25.6801	17.7544	84.2702
gene-BSU_35860	pgdS	gamma-DD-glutamyl hydrolase (PGA depolymerase)	-5.30608	-1.90749	1.21627	-1.43391	-2.06705	202.974	60.863	16.7921	5.15747	3.597	13.6111
gene-BSU_35910	rbsR	ribose operon repressor (LacI family, D-ribose)	-2.16857	-1.6797	1.71049	-1.19157	-1.17383	1913.05	1095.56	386.27	202.419	117.033	690.228
gene-BSU_35940	rbsA	ribose ABC transporter (ATP-binding protein)	-2.18325	-1.91051	1.63162	-1.05254	-1.28166	4370.64	2018.16	672.479	329.289	217.599	877.091
gene-BSU_35950	rbsC	ribose ABC transporter (permease)	-2.564	-2.33507	1.84162	-1.20162	-1.34735	5036.73	1963.08	494.599	267.166	170.137	736.933
gene-BSU_35960	rbsB	ribose ABC transporter (ribose-binding lipoprotein)	-2.56125	-2.20609	1.49032	-1.19152	-1.50963	4485.69	1729.13	494.046	220.068	115.379	499.835
gene-BSU_35970	ywsB	putative cell wall binding enzyme	-2.25918	-1.78008	1.07863	-1.07062	-1.60375	7408.07	3011.94	938.669	442.362	234.233	840.199
gene-BSU_36440	ywoH	putative transcriptional regulator (MarR family)	-1.18485	-2.24632	1.88531	-1.38892	1.81955	9.11672	7.50643	3.50879	6.06995	1.78104	6.03446
gene-BSU_37630	ywfM	putative toxic excess metabolite exporter	-2.13633	-2.57453	1.44838	-1.87088	1.02101	75.1899	92.2863	17.7009	12.2216	5.79288	15.3279
gene-BSU_37800	bslB	biofilm protein, member of the processed secretome contributing to biofilm hydrophobicity	-2.75646	-2.2184	1.26409	1.32482	-1.48211	1239	328.739	106.661	58.0688	92.2504	157.239
gene-BSU_38060	nirC	nitrite transporter	-1.6332	-2.59336	1.92174	-4.08868	1.39857	13.8702	4.3575	0.942048	4.40971	0.675075	0.972088
gene-BSU_38150	qoxC	cytochrome aa3-600 quinol oxidase (subunit III)	-2.69702	-1.11024	1.14794	-1.57286	1.04044	1593.6	287.481	213.594	100.871	44.1493	209.204
gene-BSU_38170	qoxA	cytochrome aa3-600 quinol oxidase (subunit II)	-3.17691	-1.13169	-1.032	-1.29156	1.03547	1583.79	244.582	184.534	77.6341	35.0221	186.723
gene-BSU_38260	efeB	peroxidase converting ferric iron into ferrous iron	-2.39579	-1.56755	1.51058	-1.55159	-1.61181	126.276	77.0756	25.2972	16.8972	9.74258	32.4182
gene-BSU_38270	efeM	lipoprotein binding ferrous or ferric iron for transport	-2.23568	-1.69872	1.42763	-1.54985	-1.49905	99.41	64.2625	13.978	10.042	5.28124	19.4166
gene-BSU_38280	efeU	ferrous ion permease	-2.55654	-1.54115	1.50094	-1.64414	-1.54714	42.2523	22.5951	8.8978	4.15726	2.39964	8.00505
gene-BSU_38400	epr	extracellular serine protease	-6.92917	-4.05886	-1.04268	1.20196	-1.41282	130.282	20.0226	3.31946	1.47465	0.850462	1.67582
gene-BSU_38760	cydA	cytochrome bb' ubiquinol oxidase (subunit I)	-2.98776	-2.15884	2.23713	-5.75119	-1.3045	144.857	16.4161	6.04713	14.9187	2.49699	2.36747
gene-BSU_38770	cimH	citrate/malate/H+ symporter	-1.52483	-6.60916	-1.00582	1.95319	-1.14232	143.025	71.2029	15.9513	5.64481	4.96889	23.5117
gene-BSU_38780	yxkI	putative membrane protease	-2.81383	-1.48591	1.34009	1.01326	-1.69925	36.4527	19.5929	5.71324	3.20906	2.85048	9.5651
gene-BSU_38790	yxzE	putative bacteriocin	-1.40488	-1.70339	-1.11602	-2.1055	1.26533	119.708	99.034	48.5245	18.1406	6.25788	19.0581
gene-BSU_38850	yxkC	conserved protein of unknown function	-9.0219	-3.13939	1.15477	-1.22825	1.16012	686.398	117.092	22.7393	9.34658	5.03229	22.2375
gene-BSU_38960	yxjG	putative methyltetrahydrofolate methyltransferase (biofilm formation)	-1.50817	-2.23124	2.12349	-1.02091	-1.22931	114.524	84.3602	31.3014	17.8113	14.9919	65.2582
gene-BSU_39080	licT	transcriptional antiterminator (BglG family)	-2.01916	-3.0807	2.38973	1.00599	1.01209	97.4882	54.9868	12.3168	12.7025	6.50083	38.143
gene-BSU_39140	yxiK	conserved protein of unknown function	-2.14163	-3.80643	2.55604	-1.16552	-2.04757	120.16	62.3569	11.2294	10.2387	5.16352	8.65201
gene-BSU_39150	yxiJ	conserved protein of unknown function	-1.71232	-4.47803	2.40698	-1.53826	-1.45911	92.9283	54.8627	9.78208	8.29523	2.6287	8.69206
gene-BSU_39160	yxiI	conserved protein of unknown function	-1.88866	-4.22192	2.63716	-1.31157	-2.07348	64.9636	33.1498	4.66813	5.44127	1.95137	5.27923
gene-BSU_39170	yxzG	putative nucleic acid binding protein	-1.99343	-5.97089	3.68665	-1.40436	-2.32715	129.838	72.31	8.01677	8.04913	3.6384	7.16942
gene-BSU_39180	yxiH	conserved protein of unknown function	-2.07497	-5.38394	3.24127	-1.55179	-1.50047	137.486	62.6114	8.80387	11.3479	1.18291	10.3464
gene-BSU_39190	yxiG	conserved hypothetical protein	-2.30298	-3.8336	2.06506	-1.0889	-1.93138	140.292	58.2095	10.4506	10.6346	2.60033	7.18926
gene-BSU_39200	yxzC	putative nucleic acid binding protein	-1.79186	-6.24839	2.09842	1.17656	-2.21386	20.2439	11.1533	1.12477	0.934731	0.705261	0.677037
gene-BSU_39210	yxiF	conserved protein of unknown function	-1.76758	-6.77222	2.79982	-1.19538	-1.72436	134.893	73.6481	9.47277	7.32306	1.74968	9.0171
gene-BSU_39220	wapI	antitoxin of WapA tRNase	-2.77554	-5.79993	3.74599	-1.45979	-3.13259	674.693	247.274	34.8285	35.0314	6.16733	21.1586
gene-BSU_39230	wapA	cell wall-associated tRNA nuclease precursor; intercellular growth inhibitor	-2.48106	-7.95123	5.87089	-2.21019	-2.90584	1663.1	822.931	57.6938	105.624	16.2473	57.0268
gene-BSU_39270	bglP	phosphotransferase system (PTS) beta-glucoside-specific enzyme IIBCA component	-1.50069	-2.19636	2.00603	-1.49992	1.10356	92.983	67.6058	28.2363	23.129	6.37568	41.6378
gene-BSU_39500	yxeM	putative ABC transporter (binding lipoprotein)	-2.08068	-1.76492	-1.04886	1.36287	1.05367	8.50607	5.81069	4.04598	2.54116	2.18232	2.72348
gene-BSU_39510	snaB	sulfur-containing aminoacid acetyltransferase	-2.13376	-1.50561	-1.53795	-1.22595	-1.47678	7.26317	4.21641	2.91694	0.395773	0.783859	0.33444
gene-BSU_39520	yxeK	putative monooxygenase	-2.09295	-1.5711	-1.10857	-1.29017	-1.43157	5.63349	4.05386	1.87801	1.15195	0.752332	0.942031
gene-BSU_39670	iolJ	2-deoxy-5-keto-D-gluconic acid 6-phosphate aldolase	-3.64992	-3.10317	1.66922	1.38674	-1.2854	2465.77	202.617	106.018	68.859	98.7208	100.255
gene-BSU_39680	iolI	inosose isomerase	-4.20458	-3.76832	1.13495	1.21176	1.25038	1994.73	138.58	58.7601	32.2604	22.3345	64.7699
gene-BSU_39690	iolH	putative sugar-phosphate epimerase/isomerase	-3.91878	-3.33546	1.08895	1.11863	1.32131	2421.58	161.803	85.6317	43.8932	23.7308	94.4747
gene-BSU_39700	iolG	myo-inositol 2-dehydrogenase/D-chiro-inositol 3-dehydrogenase	-4.0756	-3.21723	1.08037	1.11044	1.3337	2228.43	155.728	84.1107	36.8005	20.1153	81.0227
gene-BSU_39710	iolF	inositol transport protein	-4.27053	-3.59606	1.35972	-1.06607	1.32477	2714.91	219.448	80.8334	51.5559	25.8199	97.06
gene-BSU_39720	iolE	scyllo-inosose dehydratase	-3.79047	-3.88	1.42609	-1.04531	1.35642	1785.31	149.004	63.138	33.6208	17.2233	64.4594
gene-BSU_39730	iolD	3D-(3,5/4)-trihydroxycyclohexane-1,2-dione hydrolase	-3.78265	-3.68629	1.55949	-1.19697	1.34299	2104.49	166.49	68.848	46.9568	22.4573	74.4433
gene-BSU_39740	iolC	2-deoxy-5-keto-D-gluconic acid kinase	-3.77329	-3.71429	1.42068	-1.1364	1.33705	1901.31	156.817	64.8234	39.2477	18.3606	68.7151
gene-BSU_39750	iolB	5-deoxy-D-glucuronic acid isomerase	-3.78927	-3.73491	1.1974	-1.05121	1.37314	1029.15	83.888	32.5521	20.8326	7.65416	31.9427
gene-BSU_39760	iolA	methylmalonate-semialdehyde dehydrogenase	-3.54273	-3.60734	1.43057	-1.23606	1.44244	960.553	82.2124	34.2323	22.5501	8.414	43.6287
gene-BSU_39870	yxbD	putative N-acetyltransferase	-2.36795	-2.88218	-1.91795	1.72826	1.38932	218.694	80.4913	20.752	4.51676	3.70483	29.1465
gene-BSU_39940	yxaL	membrane associated protein kinase with beta-propeller domain	-2.37052	1.22269	1.48028	-2.03109	-1.81381	305.917	101.974	89.7064	45.2375	16.4278	86.6525
gene-BSU_40140	liaM	permease for export of regulatory peptide LiaD*	-3.21763	-1.76319	-1.26923	1.30076	1.13357	76.0215	26.4868	13.9208	2.52161	2.21967	15.2038
gene-BSU_40150	liaL	ABC transporter for regulatory peptide LiaD* (ATP-binding protein)	-2.27428	-2.43277	1.14081	1.09222	1.34153	267.722	129.453	37.3865	17.2849	8.88125	77.7239
gene-BSU_40160	liaK	membrane metalloprotease acting on modified factor LiaD	-2.39367	-1.64167	-1.46265	1.53867	-1.05955	58.0155	19.5868	13.944	2.53185	0.857185	14.4827
gene-BSU_40170	liaE	AdoMet radical amino acid epimerase modifying factor LiaD	-3.61281	-2.13932	-1.24398	1.30824	2.31688	85.9215	34.4713	7.34966	1.23184	1.31024	43.3727
gene-BSU_40340	rocD	ornithine aminotransferase	-2.39932	-2.70369	1.24144	1.3306	1.69581	475.702	93.8804	40.8673	14.9537	9.56664	173.318
gene-BSU_40470	yycC	conserved hypothetical protein	-1.09767	-2.40998	1.28931	-1.02281	1.06944	276.047	282.352	104.496	70.2412	39.3746	139.974
gene-BSU_40480	yycB	putative anion ABC transporter (permease)	-1.00052	-2.20017	1.50301	-1.14547	-1.10911	457.417	498.318	243.737	158.988	65.437	204.779
gene-BSU_40580	yybN	conserved protein of unknown function	-2.92527	-1.70006	-1.39962	1.45583	1.35676	445.22	172.201	90.7307	16.9871	15.4481	194.88
gene-BSU_40590	yybM	putative transporter permease subunit	-2.27482	-1.31003	-1.91915	1.46342	1.22131	32.2431	12.4431	9.3329	2.15084	1.0327	8.26146
gene-BSU_40620	yybJ	putative ATP-binding cassette subunit of transporter	-3.68101	-1.82488	-2.18322	2.2601	-1.32805	36.2639	9.97152	3.79032	1.04997	0.792211	6.46431
gene-BSU_40960	parB	site-specific DNA-binding protein	-1.64631	-2.04841	1.31353	1.13839	-1.74836	311.841	225.954	64.6513	37.26	20.9971	82.6871
gene-BSU_40970	parA	chromosome partitioning protein; transcriptional regulator	-1.59153	-2.21778	1.33811	1.10278	-1.25387	159.637	117.499	26.9612	14.614	10.758	59.4513
gene-BSU_39129	yxzI	hypothetical protein	-2.1794	-2.8252	3.18879	-1.48766	-1.29841	91.945	49.328	10.9799	16.4246	7.80265	12.3371

## Sheet: cluster 5
Table S5. List of the differentially expressed genes in cluster 5
Gene_ID	Gene_Symbol	Description	fold change					Transcripts per millions mapped reads (TPM)
			10H/8H	12H/10H	15H/12H	18H/15H	24H/18H	8H	10H	12H	15H	18H	24H
gene-BSU_00210	recR	recA filament-DNA complex stabilisation factor	2.27982	2.49225	-1.28238	-1.27854	2.51494	61.2458	79.7702	215.862	154.837	56.8869	132.237
gene-BSU_00220	yaaL	conserved protein of unknown function	2.64603	3.51624	-1.13435	-1.22628	2.2535	24.4632	29.1168	169.705	104.898	49.5422	99.9307
gene-BSU_00450	sspF	small acid-soluble spore protein (alpha/beta-type SASP)	2.81028	54.6881	3.10942	-3.29957	2.12878	2.11375	4.51564	251.032	1511.32	312.243	194.757
gene-BSU_00560	spoVT	transcriptional regulator of sporulation / germination	2.64099	3.27432	1.52479	-3.31294	2.42598	135.592	300.146	958.764	1418.02	245.057	396.063
gene-BSU_00570	yabM	putative exporter	1.06704	1.9779	1.29384	-2.05634	1.87013	6.19612	5.83051	11.6803	11.6482	2.65829	6.24957
gene-BSU_00720	yacD	putative protein chaperone accessory lipoprotein factor	-1.58515	2.77281	1.9175	-2.03541	2.1239	29.9926	15.7835	27.0426	53.7381	15.3311	32.7886
gene-BSU_01520	ybaK	conserved protein of unknown function	1.63367	57.123	2.43911	-5.30547	2.21524	1.23969	2.45919	87.8687	371.106	37.3169	52.8912
gene-BSU_01550	gerD	lipoprotein factor mediating clustering of germination proteins	21.1505	4.36577	1.77585	-3.38901	3.22875	0.563668	16.5573	90.1856	181.642	30.1594	55.8155
gene-BSU_01650	ybbC	conserved protein of unknown function	2.48929	3.00474	3.48773	-4.78595	1.38276	83.1791	122.377	309.113	1290.38	116.151	97.6565
gene-BSU_01660	nagZ	N-acetylglucosaminidase lipoprotein	2.47617	2.91326	3.61067	-4.59698	1.37159	65.0984	98.9255	221.128	1043.15	92.4358	88.197
gene-BSU_01670	amiE	amidase hydrolyzing N-acetylmuramyl-L-Ala bond of MurNAc peptides	1.94937	2.66686	4.18507	-4.46867	1.26008	71.4564	88.4248	192.183	970.35	92.8639	82.5219
gene-BSU_01680	murP	N-acetylmuramic acid PTS permease-MurP subunit	1.87927	2.31878	5.29979	-4.93484	1.20365	68.2854	87.9203	185.145	1034.32	92.6761	78.1013
gene-BSU_01690	murR	transcriptional regulator MurR-N-acetylmuramic acid	1.4622	2.02066	7.519	-5.00395	1.05511	61.1887	70.8796	132.623	959.449	80.9436	72.524
gene-BSU_01700	murQ	D-lactyl ether N-acetylmuramic-6-phosphate acid etherase	1.36911	2.55134	8.06271	-5.44375	-1.01762	60.7569	58.0134	156.037	1120.64	81.201	68.4407
gene-BSU_01790	ybbU	hypothetical protein	4.11853	2.44679	1.24741	-1.67722	1.73487	1.11534	4.76544	14.7177	15.3762	4.92182	7.67789
gene-BSU_01820	adaB	O6-methylguanine-DNA methyltransferase; prophage 1 region	2.89955	2.19849	-1.23451	1.18606	1.92736	9.31931	17.4203	35.1631	21.8994	13.6546	44.7221
gene-BSU_02240	mpr	extracellular glutamyl-endopeptidase	14.5735	5.3837	1.54115	-4.49719	3.32263	135.727	968.303	4493.18	9274.28	925.947	1642.97
gene-BSU_02250	ybfJ	putative lipoprotein	18.2735	5.43128	1.44392	-4.46563	3.48003	51.2387	446.057	2318.08	4437.97	428.953	830.251
gene-BSU_02600	cwlJ	spore cortex cell wall hydrolase	27.3426	7.9922	2.64645	-1.77883	1.05883	5.49872	118.057	884.015	3484.42	1662.75	793.933
gene-BSU_02610	ycbR	conserved protein of unknown function	1.53048	5.28534	1.61734	-1.5503	1.37217	3.54487	3.67173	16.3011	34.0608	15.2281	16.6096
gene-BSU_02620	phoD	secreted phosphodiesterase (endo-hydrolysis at non-specific sites throughout the cell wall teichoic acid polymer)	-1.07205	2.33346	-1.02478	1.06395	-1.2404	1.6606	2.1573	2.96118	2.84055	2.59944	2.42412
gene-BSU_02640	tatCD	component of the twin-arginine pre-protein translocation pathway	-1.89123	3.93057	1.13711	-1.74998	1.41679	0.970761	0.806497	1.42332	1.55459	0.535476	0.342698
gene-BSU_02690	ansZ	L-asparaginase 2 (putative lipoprotein)	5.06895	3.29851	1.21526	-1.81028	2.07936	1.25476	5.28666	19.8689	30.5776	9.72829	11.2215
gene-BSU_02710	yczC	putative integral membrane protein of unknown function	1.59713	2.34368	1.83441	-4.69831	1.3085	10.2385	40.0269	48.6374	118.437	13.8931	18.2165
gene-BSU_02780	ycdA	lipoprotein involved in swarming behaviour	1.44935	2.25397	1.62353	-3.0445	1.19895	149.659	360.964	316.346	683.308	79.9051	201.112
gene-BSU_02785	.	hypothetical protein	2.23015	2.10433	2.51092	-3.57282	1.18978	27.9976	76.3554	91.969	217.625	24.6441	66.8728
gene-BSU_02810	cwlK	murein L,D:-endopeptidase	2.00232	1.67696	1.09459	-1.08155	1.38661	4.68046	12.8319	16.6757	16.229	9.20828	17.6795
gene-BSU_02880	yceB	putative luciferase-like monooxygenase	1.01027	5.18254	2.25066	-3.66498	2.03005	9.39475	4.38507	25.8358	78.0167	12.1498	17.0564
gene-BSU_03110	ycgH	putative amino acid transporter	4.69567	16.3813	2.72275	-3.46709	3.45353	1.29001	2.94375	69.8696	279.732	51.5566	83.7724
gene-BSU_03120	ycgI	xenotiotic metabolite methyltransferase	14.235	3.6964	1.8662	-5.7048	3.99178	0.263423	2.81377	20.3349	37.7187	3.77793	8.78787
gene-BSU_03190	ycgL	conserved protein of unknown function	-1.09386	3.21481	1.4982	-1.84713	2.12884	18.9801	15.3393	65.3303	88.4158	31.907	53.9217
gene-BSU_03260	ycgS	putative aromatic hydrocarbon hydrolase	2.2857	4.02311	2.23094	-1.43286	1.22667	2.02327	3.73293	13.2279	32.7915	16.5378	10.6164
gene-BSU_03390	yckC	conserved integral membrane protein of unknown function	4.47508	3.76701	1.44145	-1.98382	1.54101	15.347	33.5227	199.783	264.198	92.1688	96.2417
gene-BSU_03410	bglC	aryl-phospho-beta-d-glucosidase	3.94835	2.87993	1.46574	-2.72892	2.16466	3.07069	7.78995	29.4493	51.9882	10.1326	16.6667
gene-BSU_03600	tcyB	cystine ABC transporter (permease)	-1.56815	3.16198	2.00018	-2.83281	1.95429	27.3259	17.6321	32.8205	80.7949	14.7039	22.6793
gene-BSU_03610	tcyA	cystine ABC transporter (substrate-binding lipoprotein)	-1.29119	4.20768	1.96088	-2.96829	2.04066	25.6259	14.2587	45.1298	133.411	21.4987	40.967
gene-BSU_03700	gerKA	spore germination receptor subunit	10.8248	4.0408	1.52018	-2.87263	3.4418	1.25041	5.7535	37.8866	60.6956	14.2456	17.7756
gene-BSU_03710	gerKC	spore germination receptor subunit	13.1332	3.03962	1.41214	-3.05223	4.14011	1.22059	7.34234	38.2318	56.9224	10.7371	19.186
gene-BSU_03720	gerKB	spore germination receptor subunit	3.83812	2.85244	1.46578	-2.38928	2.97332	7.21842	17.2174	67.6011	104.169	24.3928	35.7744
gene-BSU_03890	gabR	transcriptional regulator (GntR/MocR family) with PLP binding site (GabR-GABA-PLP aldimine)	-1.47633	3.65966	2.53111	-2.20101	2.24461	12.5592	6.64928	15.9963	50.3002	14.488	16.4238
gene-BSU_03920	glcU	glucose uptake protein	54.3497	7.74433	2.45866	-5.32278	3.31138	0.728071	8.06857	165.367	592.026	64.7089	112.865
gene-BSU_03930	gdh	forespore glucose 1-dehydrogenase	68.5571	8.66879	2.2308	-5.32764	3.63815	0.500202	9.72414	219.533	722.242	77.3109	114.424
gene-BSU_03970	ycnL	putative reductase or disulfide isomerase	2.41869	3.73173	2.46059	-2.81428	2.39402	1.11062	1.66084	8.5001	31.0396	6.12621	8.23346
gene-BSU_04120	yczI	conserved protein of unknown function	1.34141	2.53235	1.65158	-1.73316	1.13241	93.6548	124.279	364.003	480.719	108.787	228.162
gene-BSU_04170	ydaB	putative acyl-CoA ligase	2.05493	5.2932	2.51315	-3.31365	2.09017	7.22871	16.8315	57.5758	285.638	45.3242	63.9988
gene-BSU_04330	nudT	putative NTP pyrophosphohydrolase	1.1625	2.64516	-1.43298	1.54964	-1.33043	2.09685	1.49317	3.91982	1.20447	1.63856	3.70114
gene-BSU_04390	ydbA	conserved protein of unknown function	-1.13814	3.38223	-1.08546	-1.90986	1.86629	3.26432	5.33275	13.1759	11.5513	2.96571	8.84612
gene-BSU_04580	cshA	ATP-dependent RNA helicase; cold shock	-1.17631	2.51365	1.7073	-2.50641	1.78178	286.198	323.125	558.347	1117.24	181.848	403.873
gene-BSU_05050	lrpA	transcriptional regulator (Lrp/AsnC family)	-1.01999	2.24089	-1.06543	-1.42257	2.0081	2.86977	3.47408	4.79669	2.39775	0.527659	5.06542
gene-BSU_05160	ydeD	putative permease	1.24903	3.01064	-1.12125	-1.85215	2.25305	3.84968	4.11205	11.7811	8.98218	2.71085	4.94449
gene-BSU_05490	ydfO	putative dioxygenase	2.46	2.06296	-1.00452	-1.01587	-1.00941	1.08862	1.61005	4.64102	2.93858	2.21718	3.37004
gene-BSU_05540	ydfS	conserved hypothetical protein	2.88267	4.45116	1.37305	-1.29629	2.48194	0.777432	2.01673	9.23287	16.4942	6.92262	10.5859
gene-BSU_05720	ydhE	putative glycosyltransferase	1.09887	2.07595	1.40561	-1.35052	-1.1367	54.2082	38.6019	61.5747	75.7355	49.3977	42.6191
gene-BSU_05800	pbuE	hypoxanthine efflux transporter	1.74321	1.3526	1.98576	-2.0442	-1.29547	7.20959	21.0877	16.1819	16.1712	6.42984	11.7742
gene-BSU_06270	ydjO	conserved hypothetical protein	2.00147	1.90984	-1.06773	-1.62861	1.55461	1097.85	1596.23	4029.34	2361.85	770.19	1534.25
gene-BSU_06390	yebD	hypothetical protein	2.1245	1.23596	1.25411	-1.80704	1.18807	32.7632	29.9967	85.2313	77.1368	18.5887	41.1421
gene-BSU_06600	pcrB	heptaprenylglyceryl-phosphate synthase	2.30502	1.83567	1.0561	-1.17689	1.35347	4.46381	14.9154	19.3323	15.5639	7.32363	17.94
gene-BSU_07130	lplD	alpha-galacturonidase	4.15558	3.82485	-1.21845	-2.48344	2.23276	18.9396	55.4929	180.903	163.107	36.9371	51.4185
gene-BSU_07220	flvL	transcriptional regulator (FlvL-flavonoids)	1.4275	2.04528	-1.11174	-1.34752	1.77146	1.87218	3.49962	7.20555	4.98603	1.37694	3.9655
gene-BSU_07250	cypD	bifunctional P-450/NADPH-P450 reductase 1	24.6278	4.26408	1.69405	-4.64869	3.50459	1.01189	12.3113	100.927	194.125	24.3551	31.078
gene-BSU_07430	yfmL	putative ATP-dependent RNA helicase	1.74258	2.49487	1.19156	-2.90683	2.31446	9.73336	17.6002	41.3755	41.2575	8.1685	21.9418
gene-BSU_07570	maeS	malate (2-oxoglutarate) transporter	2.26324	1.7995	1.1804	-2.05661	2.92849	7.33239	20.9247	34.009	38.8498	8.96447	18.892
gene-BSU_07760	yfkT	putative spore germination integral inner membrane transporter	5.4829	4.53607	1.80438	-3.43505	3.32185	0.730099	2.57354	18.2086	42.8686	7.28934	8.96933
gene-BSU_07780	yfkR	putative spore germination protein	9.34237	5.57044	1.48527	-3.66723	4.34016	0.340397	0.509036	13.8347	22.9517	3.30465	5.6959
gene-BSU_07790	yfkQ	putative spore germination protein	6.05867	4.81292	1.84177	-3.72948	2.78172	0.968873	1.63406	16.0821	33.1367	5.11932	7.93872
gene-BSU_07800	treP	phosphotransferase system (PTS) trehalose-specific enzyme IIBC component	1.51202	2.61759	-1.43037	1.06823	1.23482	11.6306	15.4548	16.8894	19.8769	19.5227	16.6787
gene-BSU_07820	treR	transcriptional regulator (TreR-trehalose)	-1.21474	2.3287	-1.83896	1.07828	1.1635	41.564	38.8912	56.7279	26.0457	20.8701	50.639
gene-BSU_07930	yfkD	conserved hypothetical protein	7.87079	4.19461	1.52903	-3.5994	2.68776	12.3635	64.1289	301.883	574.426	90.8935	117.424
gene-BSU_07940	mscC	mechanosensitive ion channel	-1.28257	2.65127	1.65027	-2.70809	2.19314	33.6726	34.6724	63.7576	95.6249	16.9275	47.9106
gene-BSU_07955	yfkA	putative Fe-S oxidoreductase, radical SAM superfamily	1.1462	2.62306	1.41573	-2.39968	1.88574	27.2618	34.3599	77.3113	72.9883	17.7051	38.001
gene-BSU_07980	pdaA	exported peptidoglycan N-acetylmuramic acid deacetylase	5.58988	16.4439	2.33074	-3.87463	2.87069	0.992824	2.96937	50.4388	174.324	24.2059	45.8436
gene-BSU_08000	yfjQ	divalent cation (octahedral coordination) transporter	1.1203	1.86459	1.47847	-2.68122	2.72658	39.2339	43.0453	64.8499	96.0324	17.1687	46.0618
gene-BSU_08050	yfjL	conserved hypothetical protein	-1.22959	2.31161	-1.65154	-1.34344	1.46989	21.8801	19.2327	20.4512	10.7831	4.46308	18.2241
gene-BSU_08110	sspH	small acid-soluble spore protein	1.45094	2.75344	1.35015	-2.41996	2.93786	94.7949	90.5235	349.325	324.659	54.2169	153.135
gene-BSU_08240	catE	catechol-2,3-dioxygenase subunit	1.40008	2.26515	1.52002	-3.40866	2.85636	8.06479	17.2289	39.303	53.466	10.1609	15.8204
gene-BSU_08350	estB	secreted esterase / acylglycerol lipase	-1.45024	2.04275	-1.32026	-1.09088	1.34397	3.35396	2.78643	5.73712	2.2574	1.50745	5.39384
gene-BSU_08360	icaC	acetyl-glucosamine metabolite exporter component involved in biofilm formation	1.99579	2.4199	-1.1317	-1.18613	1.51826	3.53807	7.2499	20.4852	14.5694	9.35977	12.694
gene-BSU_08660	sspE	small acid-soluble spore protein (gamma-type SASP)	10.3952	21.1697	2.48841	-3.60961	3.32584	140.304	381.747	17439.4	68241.6	10155.2	17838.3
gene-BSU_08700	ygaE	putative membrane protein	4.07335	2.89057	-1.07475	-2.1536	2.46519	18.3622	51.0114	133.657	132.649	24.5865	76.7672
gene-BSU_08779	ygzC	putative spore coat protein	8.27408	3.54725	1.34723	-1.06545	1.05636	2.30423	16.6136	50.5497	62.6299	41.3081	35.6895
gene-BSU_08780	ygaJ	putative peptidase	1.05674	1.22115	2.26796	-2.10185	1.47411	10.6658	10.5443	12.8764	27.872	7.69834	14.2998
gene-BSU_08790	thiC	phosphomethylpyrimidine synthase	2.0689	2.29914	1.02312	-1.54311	1.85742	19.8686	36.7608	80.7607	63.4194	24.2921	44.7142
gene-BSU_08860	ssuD	FMNH2-dependent aliphatic sulfonate monooxygenase	1.61965	3.30492	1.80564	-2.31966	1.86008	1.7381	2.52493	6.1467	9.49749	3.06798	3.46061
gene-BSU_08870	ygaN	putative sulfur-related oxidoreductase	2.68253	-1.04704	2.29689	-1.63228	2.09525	1.46428	2.65893	2.51188	5.23017	1.6154	4.65227
gene-BSU_08910	queG	epoxyqueuosine reductase	2.09079	2.35134	-1.13404	-1.32422	1.50569	6.77275	13.2389	35.391	21.8994	14.0095	16.9277
gene-BSU_08930	trmL	tRNA (cytidine(34)-2'-O)-methyltransferase	5.17082	3.04639	1.00013	-2.21297	2.00842	25.885	82.5997	360.474	329.92	79.0243	143.275
gene-BSU_09000	yhbJ	putative membrane fusion protein; putative exporter subunit (benzoate transcriptome)	1.75301	7.88613	1.60165	-3.31999	3.11215	8.38266	12.2329	76.4956	179.782	19.9284	45.7641
gene-BSU_09010	yhcA	putative exporter (benzoate transcriptome)	1.95019	6.71737	2.26593	-4.40174	3.01344	15.4903	32.4092	177.865	524.662	55.1189	88.5877
gene-BSU_09020	yhcB	NADH:quinone oxidoreductase associated to benzoate stress	2.41539	5.97859	2.41427	-4.22684	2.73158	15.1044	55.5194	266.532	731.218	91.2397	123.423
gene-BSU_09030	yhcC	hypothetical membrane protein	1.84828	6.42181	2.46776	-4.66187	2.78824	7.96801	24.4134	158.268	368.567	45.6868	51.7419
gene-BSU_09140	yhcM	expressed protein of unknown function	23.617	5.55914	2.01793	-3.69229	1.94869	5.17314	121.013	690.367	1950.31	290.489	291.647
gene-BSU_09150	yhcN	putative germination lipoprotein	38.8633	10.1597	2.56399	-4.39489	2.65058	5.51801	38.6063	1098.58	4227.77	515.689	644.436
gene-BSU_09180	yhcQ	putative spore coat protein	39.9697	14.1206	2.90364	-3.26566	2.5657	6.37229	47.7746	977.31	5836.6	932.134	1078
gene-BSU_09210	yhcT	putative RNA pseudouridine synthase	1.07477	5.14836	2.10458	-3.11453	2.2429	13.235	12.1043	48.6267	130.963	23.9533	37.3778
gene-BSU_09230	yhcV	putative CBS containing enzyme (sporulation-/ germination-related)	9.45529	87.6599	3.58141	-3.83322	2.27778	8.55096	46.8602	2619.26	27395.8	4561.09	4349.62
gene-BSU_09240	glpW	promiscuous phosphoglycolate phosphatase / glycerol-3-phosphate phosphatase / 2-deoxyglucose-6-phosphatase	-1.09136	2.25015	1.60933	-2.90491	1.96478	26.8036	22.6763	36.7776	58.4893	9.35508	31.9035
gene-BSU_09350	yhdB	conserved hypothetical protein	-1.54205	217.375	4.01	-1.70371	-1.1397	4.20663	1.38257	110.165	2532.83	906.918	530.496
gene-BSU_09360	yhdC	putative exported protein	7.57361	3.97961	1.96688	-3.90205	3.53522	5.33919	21.257	140.588	311.763	47.3896	87.3879
gene-BSU_09410	phoA	alkaline phosphatase A	1.29007	2.71794	1.68955	-2.37253	1.32527	25.0192	21.028	57.7192	104.413	25.3795	21.1494
gene-BSU_09460	bcaP	branched-chain amino acid transporter or methylthioribose-degradation metabolite exporter	1.24727	1.67335	-1.03118	-2.05949	2.24914	119.522	98.47	228.747	121.387	32.6077	78.7484
gene-BSU_09590	yhdT	putative membrane protein	1.72887	1.57594	1.79909	-2.10378	1.72975	110.005	183.192	283.431	512.148	124.018	259.08
gene-BSU_09630	yhdX	conserved hypothetical protein	3.45186	3.51147	1.65291	-1.51344	1.83287	18.9298	39.6624	226.735	273.743	158.635	136.479
gene-BSU_09720	bmrD	efflux ABC transporter (ATP-binding subunit)	1.19533	-1.07668	1.27171	-1.45273	2.28366	116.236	122.456	94.3691	96.5979	39.1477	84.8406
gene-BSU_09750	sspB	small acid-soluble spore protein (beta-type SASP)	83.0076	21.1909	2.88539	-6.25655	3.00877	3.46904	83.5792	8081.57	35591.1	2719.99	4285.83
gene-BSU_09790	yheB	conserved hypothetical protein	1.98982	3.52723	1.71773	-1.05708	1.14543	9.56893	17.998	73.8397	111.757	84.0315	64.8433
gene-BSU_09800	yheA	conserved hypothetical protein	1.28915	2.50721	2.11267	-1.7294	1.62243	179.031	211.638	518.506	789.075	230.836	488.832
gene-BSU_09850	khtU	proton/potassium antiporter; methylglyoxal resistance	3.40856	1.56221	1.09377	1.12546	3.08228	28.5346	79.7845	142.947	98.3856	68.9775	125.597
gene-BSU_09860	khtT	K+/H+ antiporter for K+ efflux	2.49145	1.42746	-1.00971	1.1591	2.96089	37.4211	69.1491	120.845	68.4687	42.1542	87.4561
gene-BSU_09870	khtS	K+/H+ antiporter for K+ efflux	2.06736	1.49388	1.38796	1.062	2.22856	164.686	316.39	567.159	519.191	347.5	421.291
gene-BSU_09965	yhaJ	putative membrane enzyme	-1.15867	2.00592	-1.16132	-1.22112	1.2161	14.8476	8.73894	18.7927	6.9306	3.17571	12.034
gene-BSU_10110	pbpF	penicillin-binding protein 2C (1F class) required for spore germination	2.11456	2.89399	1.11128	-3.27503	2.8331	6.04859	9.00602	28.0563	37.6731	5.03497	11.2587
gene-BSU_10410	yhzC	conserved protein of unknown function	1.96531	1.67494	1.38278	-2.44744	2.57576	52.7572	32.6631	163.621	129.08	19.8332	73.6669
gene-BSU_10530	ntdC	biosynthesis of neotrehalosadiamine (3,3'-diamino-3,3'-dideoxy-alpha,beta-trehalose), glucose-6-P 3-dehydrogenase; kanosamine biosynthesis (recent HGT island)	1.39609	2.1613	-1.13522	-1.4942	2.57297	9.93164	10.2895	18.9192	14.1785	4.61333	9.41101
gene-BSU_10570	yhjN	putative integral inner membrane protein (recent HGT island)	1.6023	2.05061	1.17018	-2.08808	3.01089	21.1727	42.3954	66.7477	60.8775	19.3022	46.144
gene-BSU_10610	yhjR	putative electron carrier protein (putative sporulation gene)	38.8699	4.87052	1.51947	1.04096	1.24473	0.179524	23.5865	113.946	179.883	150.718	119.21
gene-BSU_10790	asnO	asparagine synthetase (sporulation related)	16.3885	6.7867	2.48291	-1.57558	1.12356	9.50399	97.83	480.164	2329.8	1263.97	658.893
gene-BSU_10900	yisY	putative acyl hydrolase or peroxidase	13.0799	3.41556	1.51484	-1.53107	1.21087	6.0411	72.7505	250.464	389.305	215.685	129.093
gene-BSU_10970	yitF	putative enolase superfamily enzyme (isomerase / dehydratase)	4.53967	9.34806	2.7741	-4.91192	3.1175	7.60952	14.6006	218.77	805.157	101.982	117.451
gene-BSU_10980	yitG	putative efflux transporter	4.12297	7.97927	2.46148	-4.85926	3.13881	6.56813	11.715	146.032	451.268	54.5502	79.4038
gene-BSU_11030	yitL	RNA-binding protein	1.05722	2.13387	-1.22907	-1.54224	1.31764	17.2692	18.7271	37.0158	18.7317	7.39816	16.9893
gene-BSU_11120	yitT	putative integral membrane protein	2.22456	1.66289	1.11165	-1.92019	1.59749	136.183	209.728	290.109	370.576	69.7681	125.852
gene-BSU_11139	yizC	conserved hypothetical protein; genus orphan	1.29096	31.7851	3.51739	-3.53376	2.48403	177.517	223.127	2400.1	23957.2	4241.85	5194.21
gene-BSU_11260	yjzC	conserved hypothetical protein	1.2107	3.96985	2.18899	-3.97215	2.31076	17.4737	12.5986	111.254	198.19	33.0121	25.908
gene-BSU_11630	prpE	phosphorylated protein phosphatase E and diadenosine-polyphosphate hydrolase	-1.04775	2.60545	1.65344	-2.64135	1.77059	10.5912	9.37041	16.0934	25.5419	5.96018	9.74381
gene-BSU_11640	kefQ	gated K+/H+ antiporter	1.07225	3.14731	1.84691	-3.36338	2.29215	4.13402	3.68741	12.3725	24.1695	3.99648	6.27388
gene-BSU_12040	yjdG	putative acetyltransferase	9.50582	3.88543	1.23166	-3.26998	2.43131	26.2106	159.036	647.732	1088.2	153.989	232.909
gene-BSU_12130	yjfC	conserved hypothetical protein	1.15174	3.7372	-1.26421	1.01191	1.38509	0.873685	1.30652	3.34337	1.58771	1.73494	1.66551
gene-BSU_12460	xlyB	phage PBSX; N-acetylmuramoyl-L-alanine amidase	2.98653	3.93917	1.19403	-2.31976	2.16346	7.33566	19.7211	55.9042	65.1301	20.8684	21.9973
gene-BSU_12580	xtmB	phage PBSX; prophage terminase (large subunit)	-1.27684	2.61211	1.9585	-1.53106	1.78294	4.2879	2.58037	3.98463	8.51504	3.23136	9.59396
gene-BSU_12820	spoIISB	three-component apoptotic control system component B (antitoxin B)	2.45992	2.50794	1.08832	1.03704	1.00518	15.6344	27.5058	138.953	83.2754	62.9043	67.6918
gene-BSU_12830	spoIISA	three-component apoptosis factor (ABC toxin/antitoxin/antitoxin system)	3.32032	2.20886	1.03088	-1.00055	-1.03247	39.4737	87.364	210.437	216.62	137.146	130.989
gene-BSU_12880	ykcB	putative membrane glycosyl transferase	1.87156	2.11477	-1.21927	-1.39402	1.16233	0.402115	1.09333	1.013	0.572684	0.282301	0.851726
gene-BSU_13040	hmpA	flavohemoglobin	1.12001	18.0885	2.37677	-4.5273	2.37375	3.40737	0.909901	29.5716	91.1153	10.6988	12.1444
gene-BSU_13350	ykoN	putative glycosyltransferase	1.51352	3.47918	1.79494	-3.15156	2.88018	1.82212	2.17089	11.5597	20.5087	3.1699	6.08609
gene-BSU_13370	ykoQ	putative metallophosphoesterase	2.4839	2.78879	1.20864	-1.04256	1.2262	3.09497	6.19859	18.1229	18.4852	12.2172	20.7933
gene-BSU_13380	ykoS	putative integral membrane protein	9.83538	4.9227	2.01947	-2.7581	3.76451	0.974198	2.47761	39.0553	78.867	17.1703	25.8424
gene-BSU_13390	ykoT	putative glycosyltransferase	7.7923	4.56731	1.83824	-2.58016	2.80341	2.32638	8.36596	74.3919	127.023	34.3481	35.5605
gene-BSU_13400	ligD	ATP-dependent DNA ligase subunit; 5'-2-deoxyribose-5-phosphate (dRP) lyase	-1.14213	14.9937	2.73009	-4.19072	2.783	14.904	7.82268	85.1667	330.424	45.2162	55.1088
gene-BSU_13410	ligV	ATP-dependent DNA ligase subunit Ku; AP/deoxyribose 5'-phosphate (5'-dRP)-lyase	-1.28	9.4629	2.90863	-4.69323	2.63529	13.4413	7.71711	44.7852	190.62	24.6988	29.9828
gene-BSU_13470	sspD	small acid-soluble spore protein (alpha/beta-type SASP)	2.76091	53.4163	3.00326	-2.71411	1.94101	2.41944	5.16867	293.72	1329.88	301.835	256.66
gene-BSU_13890	ptsG	phosphotransferase system (PTS) glucose-specific enzyme IICBA component	-1.18594	7.25031	2.58168	-4.36921	3.05751	27.4836	17.5981	91.704	326.943	37.9828	68.8015
gene-BSU_14100	ykuJ	putative RNA-specific modification enzyme subunit	2.17616	1.94693	-1.31536	-1.35471	2.97852	51.7659	101.839	201.899	148.848	48.976	197.779
gene-BSU_14110	ykuK	putative RNA-binding enzyme component	1.49167	2.19225	-1.50827	-1.16593	2.29492	73.7835	118.299	224.313	118.105	49.725	203.937
gene-BSU_14320	yknU	putative ABC transporter (ATP-binding protein)	4.15367	2.84161	1.11797	-2.09104	1.96901	26.792	101.62	257.157	264.811	68.4157	109.802
gene-BSU_14460	ykpC	conserved hypothetical protein	-1.18039	7.77929	1.1781	-1.28698	1.23405	3.49474	4.97724	46.8841	27.3743	13.494	36.3945
gene-BSU_14470	mreBH	cell-shape determining protein	-1.40027	4.86929	1.15362	1.02457	-1.37931	8.42482	8.74905	18.6315	11.1452	13.6403	49.4862
gene-BSU_14580	pdhA	pyruvate dehydrogenase (E1 alpha subunit)	-1.07308	2.78246	1.35862	-2.62663	2.02239	258.442	277.336	510.618	852.135	134.979	321.76
gene-BSU_14590	pdhB	pyruvate dehydrogenase (E1 beta subunit)	-1.08186	2.5838	1.31545	-2.49948	1.81771	334.466	360.096	578.212	877.959	151.32	299.298
gene-BSU_14630	speA	arginine decarboxylase	-1.37432	2.51015	1.52188	-1.91711	2.22361	13.3455	14.4261	25.2179	36.5957	9.77598	28.7761
gene-BSU_14800	ylaJ	putative germination lipoprotein	5.03088	3.92138	1.95914	-3.31859	2.55865	6.86467	23.5974	122.535	234.167	36.2135	57.2354
gene-BSU_15450	lspA	signal peptidase II	-1.33147	3.43469	1.29412	-1.35792	1.34993	3.55111	4.33501	9.37186	9.21895	3.1714	8.95436
gene-BSU_16790	tepA	protein export-enhancing protease (spore outgrowth)	21.8169	4.88096	1.70602	-3.6731	3.12115	1.70475	17.7542	160.842	273.876	42.1393	68.4936
gene-BSU_16799	tepJ	modulator of TepA activity (spore outgrowth)	14.2747	5.957	1.69618	-4.15821	3.58719	2.9533	25.631	239.184	456.187	52.7406	104.388
gene-BSU_16825	bcbE	bacillibactin exporter	1.23504	18.4456	2.8778	-4.04086	3.32763	20.4872	13.269	214.815	1030.26	136.399	212.494
gene-BSU_16845	ymfF	putative metalloprotease	1.22956	2.05436	-1.02646	-1.80547	1.70254	303.171	290.198	493.771	497.661	150.335	212.577
gene-BSU_16860	ymfH	putative processing protease	1.26687	2.09861	1.05404	-2.16436	1.93626	390.042	400.702	633.846	722.451	180.706	271.179
gene-BSU_16870	efpI	EF-P-5 aminopentanone reductase (EF-P repair enzyme), NADPH-dependent	1.29867	2.66107	1.16733	-2.28829	1.75783	34.9474	48.2746	78.9941	89.693	23.6799	34.6125
gene-BSU_16880	ymfJ	putative enzyme	8.38273	8.31952	2.16462	-3.24684	2.62964	21.639	73.899	1473.15	3188.85	576.801	646.193
gene-BSU_17280	ymaD	putative peroxiredoxin-related protein	1.11945	2.47993	-1.20096	-1.31772	1.51773	22.0446	30.0365	62.0727	43.5088	19.2452	36.0309
gene-BSU_17430	hflX	ribosome-splitting GTPase (also ATPase, rescuing stalled ribosomes, E-site binding)	1.53033	2.3527	-1.28285	-1.18157	1.20123	32.3741	55.0629	105.239	60.4705	33.8609	48.3961
gene-BSU_17480	ynzF	putative phage protein; defective phage region	1.59364	2.13135	-1.16845	-1.55447	1.73976	26.4385	35.544	64.0604	54.9866	19.7381	50.4481
gene-BSU_17490	ynzG	putative phage protein; defective phage region	1.27796	2.51387	-1.44404	-1.50315	1.87482	4.36843	3.66627	16.4698	7.23463	2.75388	11.2356
gene-BSU_17650	yncE	putative prophage protein	-1.32163	2.68813	-1.96921	1.34712	1.06273	1.87218	1.27259	1.79671	0.639918	0.281646	2.884
gene-BSU_17830	yndM	putative integral inner membrane protein	5.31268	61.4195	2.12282	-5.92539	3.25364	0.582457	0.466616	76.0906	291.08	21.6868	35.7777
gene-BSU_18030	sspT	small acid-soluble spore protein (thioredoxin-like protein)	17.2828	19.2883	2.71957	-2.15977	1.56775	1.56015	8.66573	211.637	1018.52	262.823	222.729
gene-BSU_18290	yngL	putative integral inner membrane protein	1.06737	5.706	2.07921	-3.72177	3.45643	10.4042	10.6859	44.8834	108.076	14.3475	25.4277
gene-BSU_18540	yoaB	negatively charged metabolite transporter	2.23915	2.09581	-1.11912	-1.50058	1.5809	1.64211	3.50805	5.50052	3.60153	2.15997	4.01328
gene-BSU_18596	.	conserved hypothetical protein	1.50447	1.92734	-1.01711	-1.72205	2.27507	17.8999	21.8513	36.2738	28.0419	5.64209	20.3111
gene-BSU_18600	yozQ	putative sporulation protein	4.65225	5.89274	2.27626	-3.80428	2.67172	15.5124	40.8527	275.634	767.094	106.516	176.182
gene-BSU_18660	yoaM	putative SOS response associated protein; defective prophage 6	6.83483	4.1224	1.51667	-3.36304	2.96013	0.344876	1.22794	7.43309	14.8397	2.15599	3.16545
gene-BSU_18700	yoaQ	conserved hypothetical protein	20.566	3.63084	1.23047	-1.82532	3.37277	1.32154	16.9393	65.3949	90.9562	22.2335	68.8131
gene-BSU_18710	yozF	putative lipoprotein	11.6861	5.4588	1.49002	-4.1833	3.62937	2.68421	11.3	73.3403	126.845	12.7159	26.0863
gene-BSU_19100	yobV	putative transcriptional regulator	-1.5353	3.31302	1.97552	-2.87509	2.57171	8.93162	6.59801	13.4381	26.5199	3.72957	14.3213
gene-BSU_19210	walL	exported cell wall lytic enzyme	1.75495	2.238	1.8921	-2.33292	2.14974	99.0177	575.688	637.571	1322.86	199.498	657.53
gene-BSU_19300	yozC	conserved hypothetical protein	-1.22695	2.31524	-1.00912	1.00869	1.44411	10.7926	5.76408	25.94	19.8061	9.5677	28.9832
gene-BSU_19430	cdaS	spore diadenylate cyclase	8.16922	3.67036	1.28428	-2.99447	2.81191	1.76417	14.1331	54.0416	81.4122	15.0139	26.1571
gene-BSU_19540	arxR	transcriptional repressor	1.1625	2.22126	1.1109	-1.93095	2.18821	17.3964	15.6089	35.5049	36.6282	10.3636	24.3194
gene-BSU_19570	yodE	putative thiol-dependent lyase/dioxygenase	2.68162	1.9524	1.28699	-1.57948	1.53771	3.36254	8.01229	15.2454	14.1014	6.61066	10.3181
gene-BSU_19950	sspC	small acid-soluble spore protein (alpha/beta-type SASP); SPbeta phage protein	70.9878	6.14011	-1.26167	-3.19126	4.21316	0.359049	12.6562	369.082	387.665	53.0781	76.431
gene-BSU_20630	yoqH	conserved hypothetical protein; phage SPbeta	5.17853	2.79966	1.43991	-2.45278	2.00238	2.08296	4.63526	16.4916	22.9509	6.70231	5.14728
gene-BSU_20980	yonV	conserved protein of unknown function; phage SPbeta	1.99118	2.45377	-1.3722	-1.78512	2.90985	1.403	1.63486	4.46008	2.71745	0.527659	1.41832
gene-BSU_21058	.	hypothetical protein; phage SPbeta	1.80718	3.59588	1.18211	-1.18247	1.64429	5.05818	2.45587	20.6306	25.3572	14.7115	17.0447
gene-BSU_21500	uvrX	lesion bypass phage DNA polymerase; phage SPbeta	1.11576	4.17779	-1.26349	1.49342	-1.28162	0.628551	0.335695	1.74177	1.22101	1.17882	1.13164
gene-BSU_21950	ypzA	putative spore coat protein	6.58358	4.29897	2.16172	-5.34631	3.61124	26.793	70.9256	658.683	1178.19	122.089	195.852
gene-BSU_22000	sspL	small acid-soluble spore protein	1.64754	5.14314	1.94923	-4.54977	3.3929	9.75277	24.0904	138.347	328.109	41.3562	63.9092
gene-BSU_22050	bpsA	promiscuous alkylpyrone synthase BpsA (polyketide synthesis)	37.4876	3.22014	1.28793	-3.56181	3.0676	0.644522	6.11956	51.1239	71.577	12.6407	18.2023
gene-BSU_22169	ypzG	conserved protein of unknown function	14.3419	19.4546	1.97809	-3.12112	3.34358	7.19506	29.6438	1847.33	4523.52	698.229	1104.9
gene-BSU_22290	sspM	small acid-soluble spore protein	1.11377	4.97755	2.16596	-2.0455	1.58434	8.2376	7.19922	19.7638	87.7541	32.2204	30.1378
gene-BSU_22300	yppC	conserved protein of unknown function	16.3595	3.72711	1.18493	-2.83815	2.86877	0.734875	10.5534	51.9338	58.6884	12.2509	20.3217
gene-BSU_22890	cmk	cytidylate kinase	1.3084	2.45455	-1.25868	-1.73556	2.52476	33.3165	34.7162	111.753	70.3701	20.9478	71.6787
gene-BSU_22910	dgrA	cyclic di-GMP receptor	-1.01177	5.32143	1.26176	-2.45771	3.36159	9.85902	7.44873	36.3318	56.7326	11.6061	24.9572
gene-BSU_22920	sleC	spore germination membrane component	44.8818	10.1062	1.95997	-5.50691	3.74913	1.62726	10.3049	322.016	927.751	81.2333	110.296
gene-BSU_23380	lysA	meso-2,6-diaminopimelate decarboxylase	-1.32351	2.80849	2.09981	-2.13857	1.73552	57.8419	43.2044	105.489	239.052	65.3232	94.5052
gene-BSU_23390	spoVAF	stage V sporulation protein AF	2.35653	6.04211	2.56363	-5.30941	3.29623	24.2474	52.0834	254.499	979.955	95.3808	137.051
gene-BSU_23401	spoVAEA	stage V sporulation germinant protein	3.99243	7.93852	2.94877	-5.99671	3.45254	9.1223	33.761	252.788	953.752	96.74	124.913
gene-BSU_23402	spoVAEB	spore germinant protein	4.17185	9.10183	2.75271	-5.33798	2.96703	3.58435	13.161	120.314	420.16	46.9571	48.874
gene-BSU_23410	spoVAD	stage V sporulation protein AD (uptake of pyridine-2,6-dicarboxylic acid)	4.52263	9.00387	2.69277	-5.3004	3.09989	5.25758	20.5641	135.796	611.585	64.9111	88.4342
gene-BSU_23420	spoVAC	mechanosensitive channel; stage V sporulation protein AC	5.86134	7.48832	2.79763	-4.92745	2.89823	2.77728	13.7204	94.1398	366.562	42.2246	60.1128
gene-BSU_23430	spoVAB	stage V sporulation protein AB	3.51927	7.9458	3.24752	-5.34524	3.02832	2.03039	11.2382	71.1218	342.371	34.7192	55.1261
gene-BSU_23440	spoVAA	stage V sporulation protein AA	4.63117	9.17285	3.0483	-4.88681	3.03077	2.91228	13.1194	120.803	506.543	61.1141	112.241
gene-BSU_23570	ansB	L-aspartase (aspartate ammonia lyase)	-1.44315	2.07235	2.16373	-2.2157	1.56208	68.7752	62.1697	61.9072	168.317	31.0115	77.7938
gene-BSU_23580	ansA	exported L-asparaginase	-1.00044	1.93113	2.22071	-2.06335	1.76758	35.5034	36.1415	35.1107	110.741	22.3001	57.2835
gene-BSU_23600	yqxK	putative nucleotide binding protein	-1.25054	2.08211	3.12676	-3.25152	2.05982	123.825	113.864	108.217	462.766	74.2269	118.975
gene-BSU_23620	yqkF	NADPH-dependent aldo-keto reductase (acts on 4-hydroxy-2,3-trans-nonenal)	-1.01942	2.75392	-1.40392	-1.19169	1.0474	94.8532	103.051	235.009	127.652	69.4165	131.65
gene-BSU_23700	yqjX	conserved protein of unknown function	4.84087	2.38271	1.43663	-1.49954	2.02882	1.39171	1.98209	8.26406	9.88381	6.39728	8.84342
gene-BSU_23710	polYB	Y family DNA polymerase V bypassing lesions during replication	12.0515	3.67591	1.76634	-1.71051	2.22164	0.063464	1.62694	4.60597	10.2604	4.44588	6.11629
gene-BSU_23730	yqjV	putative efflux transporter	1.57168	2.6035	1.41648	-2.00352	2.23029	32.0139	71.2526	127.659	180.191	53.8564	97.9315
gene-BSU_23740	yqjU	hypothetical protein	1.12113	2.26655	1.12493	-1.80023	2.33583	44.6229	76.124	129.2	141.984	41.7007	97.2695
gene-BSU_23940	yqjB	putative L,D-transpeptidase	7.70798	3.52688	-1.10927	-2.35306	2.76861	0.888494	3.1635	23.4486	21.1571	4.57424	7.21408
gene-BSU_24210	yqiG	putative NADH-dependent flavin oxidoreductase	1.27063	6.53605	2.2548	-3.98874	3.36232	31.9024	28.3723	130.928	443.419	48.1024	116.913
gene-BSU_24230	spoIVB	regulatory membrane-associated serine protease	27.7604	19.9737	2.62461	-3.9628	2.48683	0.184149	26.3578	192.94	1449.75	185.717	233.705
gene-BSU_24880	yqgO	conserved protein of unknown function	-1.51938	3.77672	1.54239	-3.10017	2.3764	29.3739	23.1699	107.934	146.122	14.9564	40.6806
gene-BSU_25080	yqfX	conserved protein of unknown function expressed in germinating spores	3.39185	236.643	3.62335	-3.045	1.98496	1.61296	2.36897	328.839	3663.44	741.799	587.627
gene-BSU_25680	yqeG	phosphatase (active on GMP and Glc-6-P)	-1.02446	1.87846	1.71654	-2.22687	1.9649	21.0594	18.1252	22.9911	42.0583	9.27642	29.2026
gene-BSU_25730	yqeC	putative catabolic 6-phospho-gluconate dehydrogenase (NAD[+]-dependent)	4.87469	3.25396	1.13264	-1.49377	1.48091	5.18934	18.5081	59.3079	60.2418	29.3524	29.1558
gene-BSU_26510	yrkH	putative sulfur transferase / hydrolase	1.72576	2.50996	-1.28867	-1.055	1.33703	1.31746	2.14791	4.11746	4.38857	1.83592	2.79054
gene-BSU_26530	yrkF	putative rhodanese-related sulfur transferase	1.01425	4.57741	-1.49538	1.13045	1.216	0.845502	0.602085	2.97519	1.67778	1.01049	1.49239
gene-BSU_26660	yrdN	putative tautomerase	2.22976	3.93037	1.39777	-1.70106	2.50214	3.02429	1.72289	10.642	14.4031	5.22707	9.82225
gene-BSU_26935	.	hypothetical protein	2.44529	3.59886	1.04771	-1.31523	1.6761	5.39629	4.94064	35.6039	21.2553	8.07939	22.0435
gene-BSU_26970	adhB	putative oxidoreductase (involving bacillithiol)	28.4418	17.4365	2.30003	-5.41751	3.3198	0.9682	3.98901	188.173	773.818	64.4309	107.079
gene-BSU_26990	yraD	putative spore coat protein	12.5076	11.0716	1.97021	-3.84043	3.08687	1.83474	9.239	138.347	365.775	41.9278	70.5067
gene-BSU_27090	aapA	small amino acid permease	1.35014	2.83151	1.19348	-1.51012	1.37705	4.81187	5.86545	10.6076	13.2319	6.80737	7.25439
gene-BSU_27420	yrrI	putative membrane protein of unknown function	4.83787	8.79022	2.42576	-4.43601	3.72961	1.62891	4.74525	63.1157	181.088	23.5655	40.6968
gene-BSU_27469	yrzR	conserved protein of unknown function	3.08354	55.6685	4.09934	-5.1355	2.95913	6.55264	14.4359	460.434	3094.75	430.121	473.63
gene-BSU_27470	yrrD	conserved protein of unknown function	2.2235	80.9163	3.55918	-4.4246	3.01887	19.6205	25.4372	1384.06	12428.1	1637.45	2412.77
gene-BSU_27570	yrzK	conserved protein of unknown function	14.1865	2.90868	1.01074	-2.4761	2.29985	2.75901	14.7352	99.5124	72.3257	20.5454	45.2902
gene-BSU_27820	yrbC	putative factor regulating gene expression	1.05071	2.22099	-1.50963	-1.27485	1.99134	11.6371	9.64211	20.6659	10.6998	4.91927	8.52336
gene-BSU_27830	sgpA	spore germination protein	34.0005	9.66702	2.62758	-2.9919	2.35718	1.31711	160.103	790.8	4364.73	746.868	904.593
gene-BSU_27860	nadC	nicotinate-nucleotide pyrophosphorylase (quinolinate phosphoribosyltransferase)	1.52175	2.38542	-1.15304	1.37678	-1.3242	1.35572	1.06195	1.55044	2.32209	2.84172	1.24435
gene-BSU_28470	lysCA	aspartokinase II alpha subunit (aa 1->408)	1.5167	3.91301	2.50431	-3.28284	2.45652	4.16549	10.2678	22.0712	69.8747	11.1704	22.0575
gene-BSU_28660	sspI	small acid-soluble spore protein	35.957	5.45813	2.01802	-4.23041	3.51763	1.45614	35.7739	313.681	687.322	86.7471	109.106
gene-BSU_29010	speD	S-adenosylmethionine decarboxylase	-2.16781	4.13086	3.03606	-2.33565	2.20675	716.972	341.695	783.782	3637.85	451.381	1311.21
gene-BSU_29050	ytbE	promiscuous aldo/keto reductase	1.11427	2.58462	1.31336	-1.10496	-1.28093	2.79828	2.29157	8.00047	7.4232	4.16757	3.16111
gene-BSU_29350	tcyM	sulfur-containing amino acid ABC transporter (permease)	-1.61765	7.17477	-1.01314	-1.10231	1.65322	0.222123	0.118631	0.439661	0.695956	0.735145	0.940967
gene-BSU_29470	ackA	acetate kinase	-1.02852	2.21371	1.58706	-2.08145	1.6247	5.42744	4.66616	6.28848	12.6088	3.65097	4.20584
gene-BSU_29479	.	hypothetical protein	1.08037	2.14238	1.8629	-1.93607	1.55541	9.63623	6.58752	5.5949	22.7045	3.40185	8.57249
gene-BSU_29570	sspA	small acid-soluble spore protein (alpha-type SASP)	5.12065	33.8689	2.64745	-6.37113	3.87117	52.0467	59.5935	6576.4	24839.8	1667.4	3100.63
gene-BSU_29910	ytzH	conserved protein of unknown function	67.1036	5.02298	2.18636	-5.40219	3.22536	0.563668	55.0908	576.816	1266.81	139.915	199.384
gene-BSU_30190	bioI	cytochrome P450 for pimelic acid formation for biotin biosynthesis	3.28401	3.47254	-1.35485	1.11686	1.22011	7.14833	20.5735	50.0458	31.0657	26.3235	27.4781
gene-BSU_30470	ytzC	conserved protein of unknown function	2.19064	16.5907	3.5759	-2.07348	1.65324	23.9063	39.9957	475.471	3181.49	1136.29	824.825
gene-BSU_30580	ytmA	putative esterase	1.43761	2.00371	1.17624	-1.76108	1.67394	7.61935	8.57271	19.3042	16.8702	6.1642	8.60729
gene-BSU_30659	ytzI	conserved protein of unknown function	1.21501	1.02684	2.19344	-1.68172	1.38439	64.86	73.0768	93.7942	147.264	37.7374	86.0985
gene-BSU_30710	ythA	putative cytochrome bd menaquinol oxidase subunit I	72.8066	3.30738	1.56594	-4.45548	4.18055	0.472262	10.4043	101.189	161.915	22.6962	34.198
gene-BSU_30720	ythB	putative cytochrome bd menaquinol oxidase subunit II	8.0466	3.67416	1.73714	-3.99113	4.06024	4.75869	12.8286	92.2975	174.612	22.7076	35.5981
gene-BSU_30739	ytzL	conserved protein of unknown function	14.3993	5.69581	1.71351	-2.1219	1.95807	0.989078	11.6214	88.7506	189.037	54.8307	38.7572
gene-BSU_30840	yteA	putative regulatory protein	42.5098	25.5586	3.42336	-4.01654	2.44321	0.109211	5.71605	159.531	949.34	154.097	193.731
gene-BSU_31300	yugS	putative membrane protein	1.49358	2.72342	1.28416	-3.41539	2.98004	6.58312	6.12027	18.4194	21.0846	3.16055	7.68201
gene-BSU_31310	yugP	putative metal-dependent protease/peptidase	1.32831	1.86677	1.59986	-2.46322	2.16903	51.1454	58.3477	121.206	161.775	42.6699	67.0626
gene-BSU_31380	yuzA	conserved protein of unknown function	17.6029	10.832	2.42822	-5.80395	3.49914	4.97669	39.3375	1021.84	2721.49	265.183	325.372
gene-BSU_31420	yugF	putative hydrolase	2.99497	2.95172	1.90863	-4.6677	2.67566	7.36574	13.3854	48.4718	94.4712	12.1889	20.7682
gene-BSU_31930	ald	L-alanine dehydrogenase (NAD-dependent)	-2.30657	4.54261	2.10198	-2.04138	1.02425	265.978	187.631	173.937	593.885	231.02	484.932
gene-BSU_32030	bioYB	putative biotin transporter	-1.21328	1.79419	2.05727	-1.85661	1.36062	10.0409	11.0038	17.3793	25.0863	10.9333	12.7054
gene-BSU_32090	yuiA	conserved protein of unknown function	-1.21396	1.30348	1.0913	-1.27917	2.20684	9.28291	13.9985	14.4111	14.0293	5.7229	20.8189
gene-BSU_32100	yumB	putative NAD-disulfide oxidoreductase	12.3033	3.62289	1.75793	-3.4915	2.53568	8.11433	99.4683	441.468	697.297	125.503	154.479
gene-BSU_32180	yutK	putative Na+(H+)/nucleoside cotransporter	1.50902	8.25714	2.48292	-5.4596	3.1303	0.453022	0.760411	4.78235	15.8974	1.39224	2.9472
gene-BSU_32320	yutC	putative sporulation-related lipoprotein	7.07514	28.1038	2.84202	-3.69127	2.4735	0.993765	7.69585	147.362	759.189	126.763	149.186
gene-BSU_32340	lytH	sporulation-specific L-Ala-D-Glu endopeptidase	-1.04722	55.9844	3.36814	-4.75684	2.61948	3.84742	4.02403	149.77	751.06	101.47	148.725
gene-BSU_32410	pucH	allantoinase	3.01453	2.93635	-1.01743	-2.22405	1.65003	9.44049	30.6276	97.4151	75.6926	26.2958	24.7156
gene-BSU_32719	yuzK	putative toxin of a toxin antitoxin system	5.12712	5.93972	2.28148	-2.9915	3.03067	17.0938	49.299	430.077	1080.09	142.378	391.033
gene-BSU_32720	yurZ	conserved protein of unknown function	9.82754	6.90987	2.40046	-4.62595	3.62682	5.40853	24.4418	298.378	818.752	85.7144	139.013
gene-BSU_32780	yusF	putative ribonuclease	1.2336	1.42489	1.45142	-2.24904	1.75005	79.7015	54.2798	92.9369	103.24	18.0969	48.719
gene-BSU_32820	fadE	acyl-CoA dehydrogenase (FAD dependent)	-1.61799	7.98111	2.24301	-7.82088	1.21634	480.997	115.564	405.39	1390.54	120.377	241.103
gene-BSU_32830	fadA	acetyl-CoA C-acyltransferase	-1.68506	8.14063	2.33343	-7.73325	1.10112	381.792	99.0607	345.513	1261.51	109.172	200.187
gene-BSU_32849	yuzL	conserved protein of unknown function	31.1707	6.76125	2.14758	-5.39707	3.4865	1.60473	15.4269	235.754	867.485	77.8954	105.369
gene-BSU_32860	yusN	putative spore coat-like protein	85.6585	7.11341	1.97053	-5.40816	3.71823	0.236131	46.6616	650.914	1703.57	158.906	237.823
gene-BSU_32870	mdtR	transcriptional regulator (MarR family, low level antibiotic resistance)	1.53114	1.27631	1.2377	-2.10892	2.02118	20.666	29.7916	45.007	33.3756	8.24839	27.0468
gene-BSU_33060	gerAB	component of the germination receptor GerA; putative transporter	21.9885	4.51571	1.78049	-4.75508	4.30696	0.143227	3.51874	23.7192	51.9214	6.59689	12.8933
gene-BSU_33070	gerAC	component of the germination receptor GerA	10.4284	4.31245	1.63123	-3.21958	2.86365	1.12131	5.68922	46.7012	88.5346	16.3521	18.852
gene-BSU_33150	yvqK	putative ATP:cob(I)alamin adenosyltransferase	1.27911	2.57301	1.20494	-2.51214	2.195	29.9935	54.2622	95.3806	88.3879	20.867	35.6282
gene-BSU_33160	yvrA	putative vitamin B12 transport system, ATPase component	1.16157	2.56515	1.242	-2.44794	2.18995	25.6781	38.5511	74.0138	80.232	18.2763	32.7713
gene-BSU_33170	yvrB	putative vitamin B12 permease	1.44056	3.0118	1.1815	-2.29426	2.11463	23.7672	40.0973	90.0816	87.7833	26.3835	33.2475
gene-BSU_33200	yvrE	putative sugar lactone lactonase	1.55792	2.23673	1.3339	-2.58046	2.19645	70.2228	102.815	162.899	241.155	54.4267	84.4124
gene-BSU_33239	yvrJ	factor involved in oxalate decarboxylase expression	1.12193	3.65748	-1.11346	-1.29035	1.96235	0.463904	0.247761	2.14253	2.76165	1.4074	4.17606
gene-BSU_33330	lysP	lysine permease	2.61732	9.97244	2.36114	-3.88142	2.1477	0.557671	1.4892	15.1592	48.435	7.87491	7.02822
gene-BSU_33340	sspJ	small acid-soluble spore protein	14.3161	14.8061	2.2714	-2.44333	2.55555	1.67301	5.36112	152.328	630.424	115.048	178.954
gene-BSU_33460	yvgT	putative integral membrane protein	1.83751	3.22476	-1.16728	-2.2549	1.51145	16.7851	24.687	69.1733	37.461	14.173	24.0665
gene-BSU_33490	cadA	Cd(II), Zn(II) and Co(II) exporter (ATPase)	1.38431	3.43507	2.34463	-2.12643	2.29475	22.2212	22.302	55.8896	185.693	59.415	122.051
gene-BSU_33540	azoRB	NADH:dichloroindophenol oxidoreductase (2-methylhydroquinone resistance)	2.55824	3.30197	1.67974	-4.22919	2.87745	56.1302	92.4428	409.656	759.326	76.9949	146.518
gene-BSU_33550	yvaC	putative integral inner membrane protein	7.9351	3.04261	1.54719	-3.43416	2.43351	1.61742	8.9927	33.711	47.7924	8.32699	12.0345
gene-BSU_33610	rnr	ribonuclease R	1.49678	1.88215	1.04407	-2.2166	1.83615	251.789	367.299	665.482	551.023	136.219	218.331
gene-BSU_33740	yvaV	putative transcriptional regulator (controlling choline uptake)	-1.17705	2.35001	-1.50902	-1.25775	1.26277	31.0698	23.2784	39.4443	24.6368	14.2954	27.7585
gene-BSU_33780	sdpI	integral membrane immunity regulator of autophagy	2.51008	6.69149	-1.29662	1.19342	-1.14013	25.0764	81.8373	320.591	156.665	69.7174	143.73
gene-BSU_33790	sdpR	transcriptional regulator of SdpC synthesis operon (ArsR family)	3.86559	4.73411	-1.1002	1.50739	-1.20452	4.32042	22.1514	77.1548	33.2101	19.0653	44.8407
gene-BSU_34000	cyeB	cysteine and O-acetylserine efflux permease	2.44965	2.47614	1.38693	-1.84324	1.34735	1.37049	3.75123	9.49437	10.7887	4.58305	3.44714
gene-BSU_34090	yvfR	putative ABC efflux transporter (ATP-binding protein)	1.61306	2.12243	1.19314	-1.51647	1.70717	5.03382	9.27052	15.2319	14.2491	6.51082	8.27241
gene-BSU_34450	sacB	levansucrase; levanase (moonlighting)	1.83793	2.22147	1.15127	-1.04492	1.16549	0.829448	1.77196	3.64838	4.53928	2.25713	2.57674
gene-BSU_34470	aspP	L-aspartate/L-glutamate / proton permease	22.3715	6.18535	2.16597	-5.09246	3.61748	0.55339	17.0346	153.283	448.854	48.7016	74.8042
gene-BSU_34510	yvdQ	conserved protein of unknown function	42.663	7.73272	3.03038	-2.79173	1.9408	4.44507	42.241	723.285	2572.41	712.239	462.967
gene-BSU_34790	trxB	thioredoxin reductase	-1.5037	2.57846	1.48507	-1.36299	1.32048	75.4897	36.1223	80.193	108.444	51.7199	75.0443
gene-BSU_35040	yvnB	putative exported hydrolase	2.63304	5.12037	1.81434	-4.60504	2.92119	4.28715	7.66118	37.4286	89.4439	9.62736	15.2779
gene-BSU_35100	yvlD	putative integral phage holin-like membrane protein	1.15451	2.78705	-1.6022	-1.34773	1.76447	282.637	211.144	475.854	294.958	104.337	177.655
gene-BSU_35110	yvlC	membrane associated phage-like stress regulator, nisin resistance	1.10556	3.64675	-1.77427	-1.48581	1.75887	42.0957	28.4212	85.4185	49.0248	15.5531	19.3468
gene-BSU_35120	yvlB	conserved protein of unknown function, stress-related	1.26341	2.34583	-1.31461	-1.36081	1.88655	551.424	481.456	797.855	581.726	243.611	383.538
gene-BSU_35270	cccB	cytochrome c551	-1.02218	2.11426	1.26489	-1.88116	1.38729	23.1952	12.388	31.2198	33.7212	9.97976	25.302
gene-BSU_35660	mnaA	UDP-N-acetylmannosamine 2-epimerase	-1.43015	2.0386	1.57683	-1.89909	1.84168	29.3751	22.6327	40.1241	45.5232	11.3462	31.8385
gene-BSU_35800	gerBA	component of germinant receptor B	22.5719	3.76612	1.49048	-3.49373	3.38237	0.974773	9.54442	63.0992	112.936	17.8035	24.088
gene-BSU_35810	gerBB	component of germinant receptor B	3.02537	4.54378	1.62458	-2.00171	1.90249	1.84681	3.56601	20.6208	40.9501	10.9707	10.983
gene-BSU_35820	gerBC	lipoprotein component of the germination receptor B	2.2835	4.74736	1.75729	-2.27227	1.97016	3.49474	6.27132	24.9946	57.8583	12.9928	14.1383
gene-BSU_35980	ywsA	conserved protein of unknown function	1.4387	5.7968	2.384	-6.88429	3.16221	5.29506	4.24196	23.4071	114.806	7.15591	11.7763
gene-BSU_35990	ywrO	nitroreductase (unknown substrate)	1.11083	1.35316	2.05558	-1.7181	1.1853	14.5945	16.7027	18.6689	31.2627	15.5258	19.3994
gene-BSU_36010	alsS	alpha-acetolactate synthase	2.46587	2.29265	-1.15545	-1.90205	1.55021	1.19348	2.05932	5.14862	5.26391	1.34197	2.0904
gene-BSU_36230	uglF	UDP-glucose dehydrogenase	3.65742	3.25662	1.03466	-2.07799	1.59441	27.0426	90.4664	239.989	262.383	86.1242	101.592
gene-BSU_36410	mbl	MreB-like morphogen	2.02247	2.87896	1.0299	-1.99359	1.835	121.322	271.671	1055.2	853.881	226.434	403.247
gene-BSU_36480	ywoD	putative efflux transporter	1.53254	3.71554	1.95057	-3.63712	2.90517	19.2674	26.4519	98.2627	187.704	30.9902	41.6684
gene-BSU_36490	ywoC	putative enzyme of isochorismatase family	1.85361	2.29404	2.03538	-3.30594	2.65037	15.7263	22.1029	55.3386	95.3489	19.0996	35.5017
gene-BSU_36590	clsA	cardiolipin synthase (major)	-1.02986	2.821	1.75308	-1.45981	1.37209	20.9467	21.389	40.5301	77.022	41.2782	37.4711
gene-BSU_37040	ywkB	putative metabolite transporter	2.29173	8.00123	2.18152	-4.29901	2.63222	2.0477	3.23715	35.3432	81.6096	10.753	18.3033
gene-BSU_37180	fadF	putative iron-sulphur-binding reductase	1.55146	3.53766	1.16894	-3.88059	1.21509	167.213	114.09	303.196	265.887	64.3231	80.5233
gene-BSU_37190	clsB	minor cardiolipin synthetase (phospholipase D family)	39.769	6.95589	2.29436	-4.39214	3.32694	0.394144	4.70125	59.118	196.189	24.6762	37.9158
gene-BSU_37200	uvsE	UV DNA damage repair endonuclease	12.7868	6.9623	1.54668	-4.39365	2.97264	1.14314	2.35488	52.1493	93.9935	11.3951	17.3815
gene-BSU_37500	speE	spermidine synthase; polyamine metabolism	-1.11904	2.19728	1.03092	-1.40664	1.44548	31.6987	33.5559	75.7909	42.277	17.0154	43.6921
gene-BSU_37750	ywfA	putative efflux transporter	1.07122	5.62393	3.01144	-1.93745	5.20309	1.01542	0.610103	2.00988	4.49389	1.92538	7.66216
gene-BSU_38100	ywcH	putative monooxygenase	1.11352	2.2764	2.17088	-2.21305	1.8746	16.8721	16.5132	32.5156	62.8461	16.7088	24.9328
gene-BSU_38320	cidA	metabolic regulator of murein hydrolases	-2.53522	5.03388	-1.51538	1.03376	1.13736	2.64137	0.217031	2.94925	1.1459	1.00869	0.860729
gene-BSU_38330	cidB	metabolic regulator controlling activity of murein hydrolases	1.15001	4.19393	2.40234	-3.97475	2.39719	4.40709	7.68058	10.4066	44.3318	6.71714	6.38692
gene-BSU_38440	ywaF	putative integral membrane protein of unknown function	3.73082	5.09237	2.13233	-3.65798	2.26018	0.440514	1.05871	10.7538	27.3973	4.43455	5.24846
gene-BSU_39110	deaD	ATP-dependent RNA helicase for 23S ribosomal RNA maturation	1.17245	2.17496	-1.33865	-1.2545	3.62827	120.951	106.972	192.748	110.25	42.8615	129.193
gene-BSU_39120	yxiM	esterase (lipoprotein)	1.10432	2.48423	-1.54945	-1.15905	3.41563	128.589	111.33	153.879	99.1907	43.2603	125.095
gene-BSU_39620	yxeA	conserved protein of unknown function	2.20268	2.05216	1.03055	-1.43733	1.15797	1.58167	4.103	9.24298	4.67251	1.99419	1.91438
gene-BSU_39630	tpeM	ABC transporter (permease); efflux of cationic peptides	1.03528	2.07111	1.04325	-1.21185	1.11752	1.64079	2.20201	4.4413	3.71728	1.87975	2.45059
gene-BSU_39640	tpeL	ABC transporter (ATP-binding protein); efflux of cationic peptides	1.65752	1.47063	1.54914	-2.40471	1.5368	4.26684	3.68952	6.43472	7.44835	1.1768	3.76569
gene-BSU_40260	yycQ	conserved membrane protein	2.21401	1.74126	1.29019	1.26049	-1.27852	48.3159	57.0059	121.678	126.647	109.218	104.68
gene-BSU_40270	yycP	conserved hypothetical protein	5.41134	3.14866	1.1986	1.18125	1.08859	30.534	79.5172	307.357	388.729	356.379	227.076
gene-BSU_40280	yycO	conserved exported protein	6.57008	3.04006	1.1022	1.22385	1.12722	30.1528	82.17	351.49	372.09	353.512	264.27
gene-BSU_40360	htrC	sporulation membrane serine protease	-1.04671	2.44808	1.73324	-1.89251	1.65288	50.1334	48.4536	102.811	138.196	54.6947	62.3009
gene-BSU_40430	yycE	conserved hypothetical protein	1.20247	3.40009	1.62497	-1.76245	3.21129	5.99099	3.59961	21.7402	31.4413	9.50087	17.4482
gene-BSU_40460	yyzB	conserved protein of unknown function	4.40623	3.62533	1.50332	-1.15903	1.10383	3.85449	9.88128	47.3023	86.229	43.1609	38.3721
gene-BSU_40560	yybP	putative manganese-binding lipoprotein	1.18287	2.05141	2.69829	-1.91646	2.25238	2.63865	3.57008	3.714	14.9916	4.94866	2.23559
gene-BSU_40570	yybO	putative permease	10.1192	4.32261	2.02329	-5.47461	2.92697	0.721392	4.49493	27.2885	67.1674	6.20096	9.04062
gene-BSU_05890	ydhUc	Mn catalase fragment; C-terminal part of YhdU	24.2481	6.07806	1.43228	-3.84519	2.84269	0.107862	12.4431	122.263	149.511	26.9523	33.5844
gene-BSU_25760	sigKn	RNA polymerase sporulation-specific sigma-K factor precursor (Sigma-27) (N-terminal half)	4.61596	4.81532	1.65057	-3.58874	1.75549	9.0151	37.2698	230.871	538.349	87.2996	102.017
gene-BSU_26390	sigKc	RNA polymerase sporulation-specific sigma-K factor precursor (Sigma-27) (C-terminal fragment)	20.4133	10.2066	2.25199	-3.89222	2.01306	0.754261	5.23684	112.469	425.975	70.625	65.7018
gene-BSU_28509	.	CDS C-terminal fragment	2.12634	1.608	1.36338	-1.93973	1.93781	70.131	118.041	157.977	261.905	68.7725	114.035
gene-BSU_39029	yxiTc	conserved protein of unknown function (C-terminus)	2.88102	3.4747	3.61418	-2.98748	1.54433	17.2293	38.5692	121.9	553.956	99.3851	151.022
gene-BSU_39030	yxiTn	conserved protein of unknown function (N-terminus)	3.46691	3.86214	4.3732	-3.0875	1.44658	19.0916	38.7119	156.707	756.138	153.325	219.669
gene-BSU_40359	yyzO	fragment of putative sensor protein	-1.57867	3.63613	1.6562	-1.66506	2.14905	11.6491	6.22155	17.0188	25.81	7.57316	12.3371

## Sheet: cluster 6
Table S6. List of the differentially expressed genes in cluster 6
Gene_ID	Gene_Symbol	Description	fold change					Transcripts per millions mapped reads (TPM)
			10H/8H	12H/10H	15H/12H	18H/15H	24H/18H	8H	10H	12H	15H	18H	24H
gene-BSU_00140	dck	deoxyadenosine/deoxycytidine kinase	1.00296	1.75328	-2.48667	1.37923	-1.12209	21.762	24.9147	34.9039	6.17805	5.76988	20.5006
gene-BSU_00150	dgk	deoxyguanosine kinase	-1.08315	2.42219	-3.15482	1.44364	-1.18089	25.4545	25.978	47.0578	6.633	7.15942	21.8865
gene-BSU_00230	bofA	inhibitor of the pro-sigma(K) processing machinery	15.143	1.16625	-4.70182	1.6922	-1.02129	22.6364	398.32	744.005	89.4019	83.1326	115.766
gene-BSU_00520	ctc	ribosomal protein BL25 (Ctc), binding 5S RNA	3.17043	1.22657	-2.63356	-1.03767	-1.07631	480.484	1866.92	2034.87	523.984	374.705	405.004
gene-BSU_00600	spcP	spore protein involved in the shaping of the spore coat	2.99195	1.54973	-3.54857	1.53172	-1.0106	92.1262	177.129	385.59	55.6159	57.6883	80.2524
gene-BSU_00610	spcQ	membrane protein of the forespore	5.66234	1.76758	-6.65484	2.58613	-1.25832	35.9777	180.396	424.665	33.2365	49.6477	62.5876
gene-BSU_00650	yabS	conserved protein of unknown function	4.93678	-1.38378	-3.87002	2.23908	-1.59686	103.777	1215.93	1328.35	192.021	152.513	179.641
gene-BSU_00660	prkT	serine/threonine-protein kinase	5.69679	1.14605	-4.08937	1.82215	-1.2442	27.6796	359.088	500.843	69.4289	63.0345	70.0923
gene-BSU_00830	ctsR	transcriptional regulator of class III stress genes	2.49051	-1.04671	-1.49737	-1.02445	1.14777	29.5926	52.3814	58.2394	26.2793	11.2865	22.7441
gene-BSU_00840	mcsA	activator of protein kinase McsB	2.4936	-1.01163	-2.00338	1.10551	1.13095	121.33	195.226	207.148	82.6527	48.2706	74.4704
gene-BSU_00850	mcsB	protein arginine kinase	2.01329	-1.04587	-1.66706	1.26017	1.01331	239.207	351.808	340.07	149.039	105.097	160.222
gene-BSU_00890	yacL	putative membrane protein possibly involved in RNA binding	2.02368	1.10594	-2.37262	1.28315	1.00895	123.697	169.736	253.51	57.2846	38.1735	88.8727
gene-BSU_00900	ispD	2-C-methyl-D-erythritol 4-phosphate cytidylyltransferase, nonmevalonate isoprenoid pathway	1.77293	1.16334	-2.53852	1.40781	1.05064	122.166	163.416	245.372	47.7229	39.03	85.8965
gene-BSU_00910	ispF	2-C-methyl-D-erythritol-2,4-cyclodiphosphate synthase	2.01615	1.70635	-2.84284	1.40521	-1.19886	15.3307	25.3557	60.9073	6.50785	8.36555	18.3311
gene-BSU_01470	ecfT	component of the influx ECF transporters	1.14464	1.26757	-2.02685	1.53357	-1.14152	35.5715	49.0473	62.672	16.9803	16.5233	35.6895
gene-BSU_01480	truA	tRNA pseudouridine (38-40) synthase	1.73385	1.6097	-2.89548	1.56884	1.00238	89.2005	192.705	263.305	52.3864	44.248	126.704
gene-BSU_01910	skfA	sporulation killing factor A	2.7295	1.3532	-2.23465	-1.28985	-1.5055	3652.63	16990.2	37157.2	6531.11	2708.01	3054.43
gene-BSU_02110	ybyB	conserved protein of unknown function	4.93638	-1.18471	-4.31341	2.40759	-3.11729	49.1071	164.442	153.453	39.2679	48.6914	16.5913
gene-BSU_02700	estA	secreted alkaliphilic lipase	1.92298	-1.53592	-1.6327	2.31646	-1.27221	2.21498	11.3039	13.1527	1.69643	2.71509	16.8115
gene-BSU_02830	ycdF	putative oxidoreductase	4.1145	-1.34235	-4.76352	3.55849	-6.46732	4.75636	17.5116	7.47819	1.45855	3.18184	1.28611
gene-BSU_03090	ycgF	putative aminoacid export permease	8.68549	1.67052	-6.75887	2.91184	-1.64683	6.73986	124.653	282.787	10.5587	35.3873	44.0171
gene-BSU_03140	tmrB	ATP-binding tunicamycin resistance protein	2.0798	1.74996	-2.12819	-1.4483	1.03241	37.0654	103.221	146.032	45.0431	21.5407	33.2261
gene-BSU_03620	bsdA	HTH-type transcriptional regulator BsdA (LysR family)	3.07297	1.20831	-2.56221	1.35821	-1.29545	3.33261	5.58015	5.11074	2.76565	1.7886	2.28936
gene-BSU_04039	yczO	conserved protein of unknown function	2.78237	3.6684	-3.47977	-1.28473	-1.20924	4.76556	5.59939	12.577	4.77806	5.78314	5.047
gene-BSU_04180	ydaC	putative methyltransferase	5.01221	1.09218	-3.30346	1.27573	-1.49194	1.0081	5.2302	2.28044	1.44392	0.953265	1.06764
gene-BSU_04190	ydaD	putative dehydrogenase	13.7621	4.32295	-7.01734	2.15207	-3.50043	0.091326	3.21916	2.28971	2.06022	2.06541	0.386878
gene-BSU_04300	ydaM	putative glycosyltransferase associated to biofilm formation	1.26948	1.40913	-2.46624	1.11547	1.10895	2.49031	2.79305	2.71107	0.702238	0.721176	1.5165
gene-BSU_04340	poxB	acetyl-phosphate generating pyruvate oxidase	3.82869	1.92489	-5.49563	2.50068	-3.96784	11.6694	56.6756	35.7295	8.94068	17.5506	9.84824
gene-BSU_04370	ydaS	conserved protein of unknown function	5.26962	3.3759	-5.61349	1.84693	-3.02061	7.31457	55.3428	26.5432	22.1541	33.1186	8.06934
gene-BSU_04400	gsiB	general stress protein glucose starvation induced	6.44656	2.02989	-16.3015	4.25176	-6.72732	58.551	392.861	143.367	36.8228	115.546	20.8189
gene-BSU_04430	ydbD	putative manganese-containing catalase	2.80219	6.644	-15.4924	3.88671	-7.8733	31.1848	66.4162	36.985	12.0487	52.9769	13.8793
gene-BSU_04630	ydcC	putative lipoprotein	29.2805	2.50205	-9.53453	1.95953	-1.68245	57.988	2299.96	6903.65	323.598	544.366	470.175
gene-BSU_04760	ydcG	conserved protein of unknown function	2.15116	-1.92221	-1.09218	1.34027	-1.22092	9.27176	10.2846	6.58793	3.01676	2.06541	5.0985
gene-BSU_04860	conQ	ICEBs1 mobile element: coupling conjugation protein VirD4	3.14839	-1.37003	-1.68529	2.0518	-1.17232	0.272459	1.28053	0.790962	0.273174	0.300579	0.23084
gene-BSU_04940	conE	ICEBs1 mobile element: VirB4-like ATPase	3.21803	1.35659	-2.25829	-1.05271	1.19015	0.441043	1.00951	1.08083	0.533009	0.121641	0.600545
gene-BSU_05900	thiL	thiamine-monophosphate kinase	1.70127	1.78717	-2.72367	1.1505	1.368	21.3865	29.7146	55.8054	9.87489	8.78115	19.9248
gene-BSU_06060	bsuMA	DNA-methyltransferase (cytosine-specific); prophage 3 region	1.34396	1.05873	-2.85153	2.31627	-1.82323	58.8513	53.8353	49.6981	9.05654	15.7753	21.662
gene-BSU_06220	ydjJ	putative membrane associated potassium channel; prophage region 3	4.11006	-1.11262	-2.87715	1.26327	-1.98774	5.05818	18.8284	3.84296	3.0736	3.8047	2.27263
gene-BSU_06400	yebE	conserved hypothetical protein	3.81732	1.8946	-3.02299	-1.26894	1.13941	18.1349	39.4984	56.6473	22.5505	10.8629	16.9552
gene-BSU_06410	yebG	conserved hypothetical protein	1.83023	5.05102	-6.07897	1.13183	1.11891	13.1053	16.5437	34.5866	12.194	7.66704	11.3558
gene-BSU_06420	purE	N5-carboxyaminoimidazole ribonucleotide mutase	-1.28395	2.7755	-2.50528	1.01238	-1.12637	35.2154	16.8325	31.1916	10.5802	6.29759	16.6892
gene-BSU_06590	yerD	putative osmotic shock glutamate synthase subunit (flavoprotein subunit, ferredoxin-dependent)	5.06166	1.4988	-4.33648	1.10284	-2.05676	5.23215	30.0196	11.3097	4.27788	4.17793	2.32201
gene-BSU_06660	opuE	proline transporter	4.48618	-1.37886	-1.69173	-1.10466	-1.30705	4.89122	28.3377	10.1024	6.16338	4.39894	4.27921
gene-BSU_06730	rlmCD	methyltransferase of m5U747 and m5U1939 in 23S RNA	1.54256	1.67605	-2.00994	-1.01525	-1.04025	40.7403	72.7921	126.993	29.8142	22.4725	34.0947
gene-BSU_06820	yeeG	putative phage receptor protein	3.75541	-1.12106	-1.67825	1.84617	-1.47027	1.38355	3.2841	5.37563	2.40829	1.44155	2.3607
gene-BSU_07550	yflT	heat stress induced protein	2.96852	2.77053	-6.69425	1.71619	-1.38311	73.8867	235.561	163.69	61.0258	86.2486	50.0132
gene-BSU_08670	ygaB	conserved hypothetical protein	3.0149	-1.98528	-1.5582	3.89263	-2.72637	157.491	675.335	505.566	92.6917	126.726	246.689
gene-BSU_08680	ygaC	putative RNA binding factor	3.31381	-1.34302	-2.10388	2.29104	-1.47243	72.2641	228.879	243.865	71.6371	59.6284	129.54
gene-BSU_09530	akrN	aldo/keto reductase specific for NADPH; protects against methylglyoxal	4.31359	-1.77135	-2.42265	1.23866	-1.38508	20.3684	87.1954	48.963	16.7709	11.4531	8.44461
gene-BSU_09680	nhaC	Na+/H+ antiporter	2.26984	2.0418	-5.68757	1.55656	1.17233	0.865988	0.863343	1.52364	0.578839	0.445837	0.305711
gene-BSU_10040	ecsA	ABC transporter (ATP-binding protein)	2.70267	1.98834	-3.8812	-1.12341	-1.18949	23.357	68.4119	149.922	14.9675	11.3681	25.7438
gene-BSU_10290	yhfN	putative membrane metalloprotease	12.7674	1.39814	-6.32829	1.41779	-1.2067	17.4942	254.53	607.412	35.5801	40.631	39.655
gene-BSU_10300	aprE	serine alkaline protease (Ca(2+)-dependent subtilisin E)	10.5972	2.0828	-1.99239	-3.51649	-3.67326	309.724	2627.98	9395.79	5653.88	1327.47	195.908
gene-BSU_10430	yhxD	putative oxidoreductase	6.08911	2.12679	-8.48444	2.51033	-5.26978	7.51369	43.8619	23.0578	7.33631	17.735	2.03563
gene-BSU_10960	yitE	putative integral inner membrane protein	11.5362	1.41163	-5.49875	2.00238	-1.4205	0.748873	90.2569	190.391	18.5363	21.9622	15.5976
gene-BSU_11100	nprB	extracellular neutral protease B	2.36253	-1.38705	-1.69528	1.10682	-1.35503	8.89895	28.1008	25.9239	8.37988	6.81316	8.29151
gene-BSU_11300	med	positive regulator of comK	2.81931	1.61363	-2.52787	1.0169	-1.01233	33.5462	100.543	179.676	37.136	22.2324	33.5197
gene-BSU_11410	yjbA	putative sporulation nucleic acid binding protein	12.5959	2.04728	-5.54925	1.3184	1.07618	45.4247	435.124	1187.66	130.611	100.168	117.559
gene-BSU_11530	coiA	protein involved in establishment of DNA transport in competence	4.62658	-1.79778	-1.80197	-1.05788	-1.1117	7.00817	46.7115	31.0725	9.39801	6.61041	11.0589
gene-BSU_11590	yjbL	conserved protein of unknown function	-1.0248	3.26426	-3.12143	-1.38829	1.30645	14.4904	15.478	45.8343	8.27905	4.70174	13.0894
gene-BSU_12160	yjgC	putative molybdoenzyme; putative formate dehydrogenase	4.81507	3.16514	-5.84474	1.68894	-2.21627	4.78489	22.4316	22.9057	5.63033	10.4695	4.7578
gene-BSU_12170	yjgD	conserved hypothetical protein	3.89484	3.91954	-8.1465	3.38065	-2.78766	4.2049	14.3728	18.8654	4.39159	13.6074	5.64077
gene-BSU_12270	yjlB	conserved hypothetical protein; cupin family	4.36327	1.34656	-2.24377	-1.533	-1.61655	5.84211	23.4432	21.0437	7.42074	3.48382	5.68548
gene-BSU_12330	yjmD	putative oxidoreductase	11.1803	1.62998	-4.99449	1.0996	1.25942	8.86534	65.5458	226.441	19.7578	16.0312	15.4305
gene-BSU_12340	uxuA	D-mannonate dehydratase	9.18776	1.7818	-6.79583	1.38699	1.07535	10.2658	59.7269	223.468	13.5503	12.6506	14.8817
gene-BSU_12350	uxuB	fructuronate reductase	7.68789	1.63647	-5.82181	1.38685	-1.0177	18.601	75.5617	265.164	18.8971	18.3444	18.9037
gene-BSU_12360	exuT	hexuronate transporter	7.70365	1.60052	-5.5832	1.9157	-1.18876	17.3498	78.365	217.986	17.3565	24.2331	22.2462
gene-BSU_12370	exuR	transcriptional regulator (LacI family)	3.797	1.42463	-3.52842	1.69006	1.02681	24.955	64.2924	167.445	20.8012	25.799	39.3938
gene-BSU_12890	ykcC	putative glycosyltransferase	1.06327	2.09974	-2.82405	1.69224	-1.19188	1.69883	1.38257	2.56197	0.608317	0.669345	0.77107
gene-BSU_13020	ddaH	N(G),N(G)-dimethylarginine dimethylaminohydrolase	6.26816	-1.97178	-1.72468	-1.93963	1.09118	20.183	122.718	35.5507	30.7317	7.45562	5.22286
gene-BSU_13120	proB	glutamate 5-kinase	2.00386	1.23053	-2.28166	1.72453	1.26002	18.0466	48.0385	60.5738	14.1808	16.433	29.958
gene-BSU_13130	proA	gamma-glutamyl phosphate reductase	1.60302	1.58839	-2.45834	1.15822	1.14624	63.1952	155.262	259.067	53.7352	44.0686	58.9869
gene-BSU_13140	ohrA	peroxiredoxin	1.1749	2.06887	-1.51188	-1.3083	-1.11912	4.61454	2.5631	4.87136	3.70131	0.610895	1.36838
gene-BSU_13169	ykzN	hypothetical protein	3.16035	2.34616	-3.37364	1.34081	-1.10875	5.51801	33.3999	40.0477	21.035	16.7407	13.6358
gene-BSU_13710	ykvI	putative transporter	11.1738	1.5985	-6.58571	3.75533	-1.74993	2.71144	86.4044	229.285	10.3833	32.2393	38.3674
gene-BSU_13720	queC	pre-queuosine 0 synthase	16.3645	1.25652	-3.13051	-1.57104	-3.74833	2.02536	34.7417	63.042	4.85271	2.95729	1.5141
gene-BSU_13730	queD	6-carboxy-5,6,7,8-tetrahydropterin synthase; queuosine biosynthesis	9.91704	1.19908	-3.34566	-1.70044	-2.32415	4.54316	41.4355	60.8725	5.80335	2.79519	3.88619
gene-BSU_13740	queE	7-carboxy-7-deazaguanine synthase	9.21727	1.22931	-3.87798	-1.68073	-2.37361	4.61907	46.4704	77.1112	3.56763	2.25163	3.41293
gene-BSU_13750	queF	NADPH-dependent 7-cyano-7-deazaguanine reductase	8.23929	1.25167	-2.8255	-1.77409	-1.74414	13.4211	107.771	151.473	17.6119	6.27088	9.86598
gene-BSU_14000	dapX	N-acetyl-L,L-diaminopimelate aminotransferase	3.86614	1.54631	-3.37574	1.73411	-1.0291	71.4471	324.665	661.535	109.052	113.681	162.958
gene-BSU_14950	ylbB	putative enzyme	2.74052	1.80394	-2.54062	-1.33862	1.60688	23.7478	30.6276	90.0645	27.0068	10.5765	24.0325
gene-BSU_15030	spoVV	dipicolinic acid transporter (to the spore)	21.8583	1.4149	-8.55792	3.33403	-1.65019	1.08944	136.494	341.807	12.4891	33.5465	31.4913
gene-BSU_15040	ylbK	putative hydrolase	1.30713	2.03501	-3.62228	1.46694	-1.15432	13.5572	25.6371	51.9462	4.97142	7.42281	17.9739
gene-BSU_15050	ylbL	putative degradative enzyme	1.90087	2.24221	-3.33048	1.2434	1.11744	15.711	30.7803	88.0847	10.9017	9.21582	18.9927
gene-BSU_15210	spoVE	factor for spore cortex peptidoglycan synthesis (stage V sporulation)	3.69131	1.51495	-2.89004	1.22757	1.01476	61.8484	268.908	503.25	81.3173	68.9407	122.985
gene-BSU_15240	divIB	cell-division initiation protein	1.44378	1.22463	-2.37659	2.07892	-1.41389	66.1221	94.1716	107.428	17.2334	21.9606	64.2442
gene-BSU_15300	bpr	bacillopeptidase F	5.04805	-2.12063	-1.76317	1.15241	1.28169	136.719	1008.38	593.834	233.701	155.75	150.02
gene-BSU_15650	tcaB	P-type calcium transport ATPase (sporulation)	20.0161	1.78972	-7.33537	2.21107	-1.77389	4.00071	794.096	1891.67	86.8603	178.038	139.478
gene-BSU_15670	remA	essential sporulation DNA binding protein; regulator of biofilm formation	1.80972	1.61021	-2.22685	1.3295	-1.00245	115.909	200.334	385.064	89.7876	83.5343	159.457
gene-BSU_16480	swrB	coupling factor for flagellin transcription and translation	1.08108	2.18073	-4.52809	1.12052	1.55688	312.967	168.315	408.452	69.2178	48.1068	77.9882
gene-BSU_16700	ylxY	putative sugar deacetylase	3.62637	1.68256	-6.53532	2.21619	-1.58101	44.9675	173.844	314.306	25.5607	32.485	45.1943
gene-BSU_16710	mlpA	specific processing protease	2.9578	2.11254	-2.67034	-1.00568	-1.00958	38.293	148.179	374.885	76.5144	36.0388	49.8299
gene-BSU_17520	ynaD	putative N-acetyltransferase; putative phage region	-1.63179	3.20078	-3.88404	1.77054	1.18477	6.74424	2.78332	15.9786	0.864451	2.11372	7.9542
gene-BSU_17530	ynaE	conserved hypothetical protein	1.06213	1.94643	-3.37831	1.59247	1.18469	13.1053	13.4752	19.7176	2.53276	3.58068	9.98788
gene-BSU_17560	ynaI	conserved hypothetical protein; defective phage region	1.19141	1.57489	-2.63537	1.70633	1.0068	6.01006	4.10147	9.03218	1.77846	2.11803	4.42015
gene-BSU_17930	ccdA	cytochrome c-type biogenesis protein CcdA; thiol-disulfide oxido-reductase	2.02354	1.03692	-2.57907	1.49691	-1.13054	76.8547	128.24	170.002	28.2558	24.6886	45.284
gene-BSU_17940	yneI	putative response regulator (CheY homolog)	1.89899	-1.1766	-2.53972	1.52662	-1.09634	40.2906	65.0177	72.8892	11.9451	8.84199	22.9409
gene-BSU_18510	yoxC	transition-dependent and sulfur-related metabolism protein	5.14213	-2.05326	-4.11086	3.48842	-2.31634	10.0217	51.3278	12.8852	4.5087	9.21334	6.80356
gene-BSU_18520	yoxB	conserved protein of unknown function	6.1952	1.17654	-3.95753	1.97247	-1.08815	7.44502	42.8125	35.1249	10.8645	13.1077	7.45268
gene-BSU_18530	yoaA	putative N-acetyltransferase	1.86848	1.40893	-2.876	1.38024	1.26059	15.7558	23.9075	18.0705	7.93546	7.71627	12.4757
gene-BSU_18810	yobA	hypothetical protein	2.58744	1.45207	-3.11159	1.64286	-1.37929	4.33232	10.1807	14.5778	3.80073	3.22613	2.98232
gene-BSU_18880	yobE	putative SOS response associated phage protein; putative defective prophage 6	1.6733	1.25783	-2.04751	1.42664	-1.19021	16.2029	28.2515	40.2463	12.6171	13.4721	14.384
gene-BSU_19150	yocB	conserved protein of unknown function	3.93526	1.4758	-4.74148	2.86401	-3.18271	15.4652	43.9799	28.8884	9.31355	21.2159	6.06221
gene-BSU_19240	yocK	putative general stress protein	6.36514	1.89482	-5.22275	1.3907	-1.01021	7.0321	66.9196	99.9638	18.5277	17.1026	17.4337
gene-BSU_19400	sodC	superoxide dismutase (exported lipoprotein)	1.58892	1.14364	-2.44401	1.25968	1.07093	163.384	223.123	323.218	68.4496	58.7121	92.7163
gene-BSU_19640	yodL	shape determination factor	3.33361	-1.39745	-4.57035	2.76121	-2.07759	111.832	407.156	613.007	58.1899	58.3822	85.3905
gene-BSU_19650	pgpB	phosphatidylglycerol phosphate (PGP) phosphatase; undecaprenyl-pyrophosphate phosphatase (promiscuous activity)	3.06062	1.28493	-2.81958	1.22115	-1.00919	19.401	48.4457	93.0787	14.0897	9.28421	26.1257
gene-BSU_19800	phyC	phytase	2.09214	1.51654	-2.06517	-1.68818	1.15185	8.14375	24.1227	29.4393	12.951	3.51065	6.08803
gene-BSU_20340	dpoL	DNA polymerase with 3'-5' exonuclease activity; phage SPbeta	1.21992	2.10588	-4.46054	2.12751	1.21805	1.38478	1.0933	2.06566	0.389863	0.442813	0.913948
gene-BSU_20450	yorA	putative uronase; phage SPbeta	1.64041	1.6061	-2.7861	1.51305	-1.22622	1.69677	2.28936	2.65144	0.55961	0.911313	1.13493
gene-BSU_20580	yoqM	putative membrane bound or exported protein; phage SPbeta	5.94558	2.54659	-3.17328	-2.01708	-2.62953	323.545	562.649	2664.29	878.273	187.019	296.688
gene-BSU_20820	yopO	putative transcriptional regulator, lambda repressor-like; phage SPbeta	2.15713	1.32098	-2.48217	-1.39855	1.10109	8.49075	14.1956	30.6895	7.40262	1.83268	6.25544
gene-BSU_20840	yopM	hypothetical protein; phage SPbeta	1.46703	1.43016	-4.29154	1.43086	1.36603	1.95601	4.59652	9.29193	1.22571	0.215789	3.72876
gene-BSU_21150	yonB	conserved protein of unknown function; phage SPbeta	-1.03644	1.97246	-3.05067	1.87477	1.04984	3.5566	3.38606	4.59115	0.969001	1.3221	2.12897
gene-BSU_21160	yonA	conserved protein of unknown function; phage SPbeta	1.78991	1.08291	-2.13881	2.56865	-1.63707	1.50252	2.49654	2.86386	1.15077	1.93385	1.59125
gene-BSU_21520	yolC	conserved phage protein of unknown function; phage SPbeta	1.86929	-1.48925	-1.68206	2.25786	-1.34352	44.9324	53.9941	48.483	15.2514	14.4579	44.6119
gene-BSU_21910	metAA	homoserine O-acetyltransferase	1.63704	1.14123	-2.19863	1.30627	1.02508	38.6215	64.4301	80.8548	16.0439	13.3568	32.6301
gene-BSU_22150	ypvA	putative ATP-dependent helicase	1.63786	1.38048	-2.41387	1.01669	-1.07283	123.99	212.594	323.24	77.1596	44.5671	78.8221
gene-BSU_22270	yppE	conserved protein of unknown function	3.34356	-1.25798	-2.96679	2.33706	-2.1497	57.0714	337.996	522.425	67.4202	57.0152	86.8573
gene-BSU_22280	yppD	putative sporulation protein	4.21074	-1.32306	-4.36664	2.84338	-2.33973	40.2748	221.927	393.528	38.0569	41.2578	57.5482
gene-BSU_22500	ypjD	oxidized nucleotide pyrophosphohydrolase	2.37041	1.33876	-2.55418	1.15929	1.15951	9.12689	17.4981	25.3224	4.98603	4.13082	14.375
gene-BSU_22520	ypjB	sporulation septum-associated protein	6.78042	1.23764	-6.52647	1.82871	-1.4839	36.8926	238.238	458.893	26.8371	32.8984	41.6902
gene-BSU_22770	mtrB	tryptophan operon RNA-binding attenuation protein (TRAP)	-1.03298	1.52689	-2.10094	1.43267	1.1617	28.9696	39.0484	63.2571	12.3184	10.8434	38.3506
gene-BSU_22990	ypbF	conserved protein of unknown function	5.20044	1.47036	-5.95642	2.5926	-1.22565	13.8137	59.399	118.249	11.3196	17.2908	26.8207
gene-BSU_23180	spmA	spore maturation protein	17.9482	1.64854	-8.80302	3.03782	-1.74994	1.06439	276.275	702.091	30.7648	65.7575	53.6853
gene-BSU_23190	dacB	D-alanyl-D-alanine carboxypeptidase (penicillin-binding protein 5*) (required for spore cortex)	19.8066	1.74238	-11.4533	3.91099	-1.75001	1.30026	233.186	543.723	20.7558	56.6612	48.4868
gene-BSU_23470	spoIIAA	anti-anti-sigma factor (antagonist of SpoIIAB)	3.76461	-1.97002	-2.54094	1.58775	-1.36615	298.978	1129.84	1028.22	234.955	127.425	160.905
gene-BSU_23520	fur	transcriptional regulator for iron transport and metabolism	3.35461	-1.04628	-3.80753	3.20237	-1.29936	45.6064	121.507	176.853	13.1397	29.0121	50.7056
gene-BSU_23530	spoIIM	autolysin component for dissolution of the septal cell wall (stage II sporulation)	10.3161	1.02042	-7.37888	5.13688	-2.23549	1.09719	151.574	259.963	10.4659	33.7574	30.728
gene-BSU_24000	bmrU	putative lipid kinase BmrU	5.72845	1.24222	-2.50666	-1.21199	-1.14171	26.7383	124.577	120.357	51.4232	22.6571	15.0902
gene-BSU_24100	bkdR	transcriptional regulator	1.88419	2.19272	-3.70945	-1.03517	-1.03519	22.8822	43.9548	86.9906	11.6133	8.55371	12.6976
gene-BSU_24360	spoIIIAH	stage III sporulation ratchet engulfment protein	21.32	1.33815	-9.23662	2.9828	-1.84311	1.79524	1164.24	2537.14	78.5979	189.47	142.215
gene-BSU_24370	spoIIIAG	stage III sporulation engulfment assembly protein	22.2007	1.28318	-15.7911	5.37361	-2.22135	0.569795	408.147	778.951	20.8521	70.0892	64.5687
gene-BSU_24380	spoIIIAF	stage III sporulation protein (feeding tube apparatus)	21.4291	1.23973	-11.7414	4.34101	-2.02998	1.26621	379.379	662.158	24.9146	58.5299	58.4672
gene-BSU_24390	spoIIIAE	stage III sporulation protein (feeding tube apparatus)	16.8148	-1.03919	-7.83011	4.00123	-2.27202	0.655264	345.553	522.604	24.719	50.5302	48.508
gene-BSU_24420	spoIIIAB	stage III sporulation protein (feeding tube apparatus)	15.9586	-1.00832	-7.86119	3.84464	-2.06861	0.304774	400.259	666.195	25.7827	68.4226	65.0389
gene-BSU_24430	spoIIIAA	ATP-binding stage III sporulation protein	15.0114	1.22478	-8.03739	3.22018	-1.9954	0.425496	750.646	1668.24	60.4723	139.368	123.291
gene-BSU_24440	yqhV	conserved protein of unknown function	14.4678	-1.15403	-9.63606	5.13673	-2.30512	0.278836	303.797	518.799	15.9004	65.5218	63.7855
gene-BSU_24740	yqxL	CorA-type divalent ion transporter	5.65675	-1.47386	-2.51431	-1.00214	-1.2402	5.02781	22.9786	8.37475	4.28691	2.31871	1.65853
gene-BSU_24750	yqhB	putative membrane associated enzyme	4.71072	1.1317	-3.7087	2.95671	-3.57492	4.43745	14.3461	5.9336	3.3739	8.02851	3.57164
gene-BSU_25060	yqfZ	factor involved in motility	12.4919	1.01254	-9.64989	3.76115	-2.03861	0.262106	75.5918	109.64	3.6134	5.63856	7.77239
gene-BSU_25070	ispG	4-hydroxy-3-methylbut-2-en-1-yl diphosphate synthase (1-hydroxy-2-methyl-2-(E)-butenyl 4-diphosphate synthase)	1.84229	1.16328	-2.18634	1.39413	-1.15436	62.1287	127.986	196.082	26.288	27.0798	59.1888
gene-BSU_25420	yqeW	putative Na+/anion cotransporter	12.0516	-1.02507	-6.76842	2.72813	-2.02754	2.38278	56.6302	103.086	5.06602	9.20045	9.28288
gene-BSU_25790	arsB	arsenite efflux transporter; skin element	5.30174	2.35883	-4.13252	-1.26464	1.42911	11.4057	32.4345	100.869	12.5433	6.37479	10.3195
gene-BSU_26440	yrkO	putative integral inner membrane protein	2.09059	1.23388	-2.18107	1.58164	-1.23634	11.4913	13.8606	17.8044	4.77364	5.05669	8.54634
gene-BSU_26450	yrkN	putative N-acetyltransferase	3.91687	1.93319	-3.59199	1.94219	-1.18521	6.48218	17.611	31.4255	4.59181	6.45162	10.1483
gene-BSU_26570	yrkB	hypothetical protein	1.92692	2.55827	-3.95942	2.21785	-1.03534	5.34909	6.8564	13.4111	3.01676	4.13082	7.36451
gene-BSU_26640	yrdP	putative oxidoreductase	1.02847	2.02882	-2.24635	1.07508	1.66398	1.51506	0.970993	1.69934	1.18675	0.376071	1.28363
gene-BSU_26690	brnQ	low-affinity branched-chain amino acid transporter	1.12175	1.51429	-2.28947	1.37038	-1.0717	17.236	15.046	23.7636	6.85288	3.96689	9.37873
gene-BSU_26710	azlC	branched-chain amino acid / methionine exporter	1.29326	1.81062	-2.12123	1.11982	-1.34041	10.2787	11.4184	25.4992	3.47814	3.23176	6.85799
gene-BSU_26720	azlB	transcriptional repressor of the azlBCD operon	1.63755	1.84267	-3.25016	1.72775	-1.26926	7.63092	10.6318	13.3531	3.22254	2.10462	6.6761
gene-BSU_26730	yrdF	putative ribonuclease inhibitor	5.14343	2.6917	-5.79138	1.17314	1.01417	2.84897	11.8683	27.0678	2.49939	2.04296	6.63791
gene-BSU_27300	yrrS	conserved hypothetical protein	7.10152	2.38774	-6.9823	2.84401	-1.54708	26.7706	194.543	587.086	35.8673	64.6278	96.799
gene-BSU_27670	spoVB	involved in spore cortex synthesis (stage V sporulation); translocase with flippase function for peptidoglycan synthesis	19.993	1.54805	-7.03212	2.23641	-1.70537	2.27259	172.675	370.59	19.6842	36.075	32.3582
gene-BSU_27970	spoIVFB	membrane metalloprotease [proteolysis of pro-sigma(K)]	16.9677	1.2258	-8.43813	2.52881	-1.94298	4.08123	355.145	695.562	26.8817	52.4785	40.053
gene-BSU_27980	spoIVFA	regulator of SpoIVFB (stage IV sporulation)	17.3536	1.24053	-9.28569	3.17547	-1.73024	6.3301	597.445	1169.42	46.2367	108.952	89.6653
gene-BSU_28340	ysnF	putative stress response protein	7.30002	5.49425	-11.7527	3.27546	-3.89686	6.50481	34.8429	23.9834	11.9887	34.3506	8.20599
gene-BSU_28360	rdgB	deoxyinosine/deoxyxanthosine triphosphate pyrophosphatase, promiscuous (subunit A)	1.72152	1.35388	-3.00421	1.16672	-1.17889	85.2172	142.517	241.237	29.135	20.706	44.0789
gene-BSU_28370	rph	ribonuclease PH	2.24964	1.60709	-3.75517	1.37512	-1.12831	65.1002	146.13	251.245	30.7126	29.9736	52.6961
gene-BSU_28960	ytxC	sporulation protein	8.8894	2.1801	-5.95852	1.80599	-1.16535	37.7358	433.357	1331.59	107.4	140.836	169.603
gene-BSU_29160	ytvI	putative sporulation-related permease	25.9378	1.25708	-8.10859	2.72071	-1.83749	0.704585	506.655	954.386	40.6199	91.1389	72.9034
gene-BSU_29239	ytrH	membrane protein involved in a sporulation process	22.9034	1.44939	-8.4807	3.00909	-1.71257	0.689752	150.054	294.897	14.8397	33.3545	26.2975
gene-BSU_29240	ytrI	protein involved in sporulation	33.0923	1.56099	-12.2865	3.86068	-1.93068	0.156015	107.988	235.107	12.0251	23.8382	14.5402
gene-BSU_29560	ytcI	putative acyl-coenzyme A synthetase	1.33354	1.71204	-2.13027	-1.06635	1.24197	79.6702	87.266	184.549	46.4846	29.434	66.9347
gene-BSU_29630	refZ	regulator of FtsZ defining the chromosome region captured in the forespore	4.57845	-2.01344	-3.86415	2.9089	-1.65901	940.934	2905.22	3292.38	484.683	512.767	539.022
gene-BSU_30210	bioD	dethiobiotin synthetase	1.88862	1.60406	-2.41584	1.54303	-1.30104	9.49003	17.2568	20.5731	6.01762	5.85792	9.21296
gene-BSU_30370	bceB	ABC transporter (permease)	3.05192	1.54436	-1.68497	1.00256	-1.74806	10.7759	12.6354	40.7342	21.6033	13.2065	8.02294
gene-BSU_30380	bceA	bacitracin ABC efflux transporter (ATP-binding protein)	2.44062	2.101	-2.72916	-1.31915	-2.377	6.70743	6.94413	31.0463	7.75964	4.66749	3.60642
gene-BSU_30500	tbcS	tetraprenyl-beta-curcumene synthase	1.34354	1.51539	-2.36684	1.17883	-1.16404	224.214	221.465	342.389	61.7707	52.9597	117.672
gene-BSU_31000	yuaI	putative N-acetyltransferase	1.04549	2.86085	-3.121	-1.23012	1.45474	210.136	136.123	228.789	82.7836	35.563	53.9217
gene-BSU_31010	floT	flotillin lipid rafts scaffold protein	1.04882	3.04248	-2.92609	-1.49047	1.4578	370.443	243.793	392.796	144.729	64.465	109.728
gene-BSU_31700	comX	competence pheromone precursor (pheromone peptide aa 46->55, geranyl-modified)	1.22219	1.95386	-2.59298	-1.25247	1.68718	9.36091	2.99967	16.0581	3.51955	1.0327	1.48706
gene-BSU_31900	yukD	ESX secretion system YukD protein	1.24143	1.2387	1.12639	1.05657	-2.23365	20.6408	39.1957	26.8046	6.15921	6.86748	18.737
gene-BSU_33240	oxdC	oxalate decarboxylase	2.17822	2.41777	-1.98183	-2.02821	1.13405	42.5752	84.7887	129.655	110.632	27.4175	64.5781
gene-BSU_33410	yvgO	exported stress induced factor	8.96793	2.09413	-9.42839	3.31799	-6.85142	68.4387	548.187	402.016	91.7545	260.598	29.472
gene-BSU_33520	csoR	repressor of copper utilisation proteins-Cu(I)	3.48367	-1.40586	-1.7775	1.32532	-1.46534	4.62539	9.33232	5.42535	3.05948	1.70092	2.72142
gene-BSU_33650	yvzC	putative phage-like transcriptional regulator	3.10192	-1.06094	-2.56475	1.33566	1.22817	2.35223	9.69126	6.65127	0.842285	1.48286	1.06764
gene-BSU_34360	epsB	protein tyrosine kinase involved in biofilm matrix formation	2.64075	1.61173	-2.67735	-1.05665	1.0382	45.8685	345.664	365.435	44.159	35.3837	87.415
gene-BSU_34370	epsA	modulator of protein tyrosine kinase EpsB involved in biofilm matrix formation	1.96903	1.19446	-2.55387	1.07138	1.03063	22.4184	113.298	75.9434	7.68809	7.99796	31.8928
gene-BSU_34550	mdxM	bifunctional beta-phosphoglucomutase / glucose-1-phosphate phosphodismutase	1.6053	1.62331	-2.17306	1.37275	-1.40451	37.5261	41.1938	57.1365	15.484	11.7191	22.378
gene-BSU_34560	mdxL	oligo-1,4-1,6-alpha-glucosidase (sucrase-maltase-isomaltase)	1.60642	1.46724	-2.0327	1.25561	-1.31085	39.3625	47.0269	51.2645	12.8883	11.9367	22.276
gene-BSU_35180	csbA	conserved membrane protein of unknown function	4.78612	3.9251	-3.34539	-2.71671	-1.53701	41.5284	193.797	406.056	76.7902	42.0592	40.0155
gene-BSU_35570	tuaE	putative polymerase of teichuronic acid repeating units	1.81701	1.6664	-2.54236	1.25928	1.16707	18.5457	19.6952	36.0012	9.90848	6.0315	11.2964
gene-BSU_35600	tuaB	putative exporter involved in biosynthesis of teichuronic acid	-1.08142	2.34665	-2.62062	1.43397	1.24956	20.9035	13.3622	32.5857	8.68737	7.677	9.80725
gene-BSU_35830	ywtG	putative carbohydrate/proton transporter	2.89856	-1.30961	-2.09954	1.11047	-1.44251	10.2439	39.428	9.43958	7.31575	5.65056	4.60622
gene-BSU_35880	capA	capsular polyglutamate synthetase (acid resistance)	1.05885	1.7439	-2.81219	1.80386	1.31239	6.67303	4.62942	8.35163	1.37949	1.70762	4.07999
gene-BSU_36200	ywqI	conserved protein of unknown function	2.27867	-1.49979	1.04397	-1.20703	-1.01219	47.2995	124.216	80.3046	53.0495	23.5979	44.6689
gene-BSU_36310	ssbB	single-strand DNA-binding protein	5.23282	-2.67518	-1.35775	-1.27623	1.16626	88.748	904.744	453.874	180.958	102.473	188.709
gene-BSU_36540	ywnJ	putative integral inner membrane protein	13.2516	2.03828	-4.99918	1.57046	-1.38335	10.9675	246.612	552.895	57.7772	55.0629	65.9511
gene-BSU_36670	csbD	stress response protein	7.86879	-3.00806	-2.03875	4.39316	-6.19765	1.24812	8.44353	2.19598	0.782122	5.50775	0.440611
gene-BSU_36740	ywmC	putative exported protein	4.35127	1.65744	-3.02931	1.20791	1.01466	1.03463	3.43822	6.978	1.29668	1.6487	2.92195
gene-BSU_36750	spoIID	lytic transglycosylase; autolysin required for complete dissolution of the asymmetric septum (stage II sporulation)	22.2525	1.34341	-7.23339	2.47328	-1.35974	6.40025	572.636	1146.08	71.189	114.234	112.002
gene-BSU_36940	mntP	manganese efflux pump	15.8689	1.43269	-6.00548	2.77316	-1.65334	4.79118	151.424	294.358	18.6322	41.508	40.8916
gene-BSU_36960	ywlB	conserved protein of unknown function	12.162	1.18446	-4.65884	2.29465	-1.63702	4.25036	305.318	672.336	68.3617	76.0014	68.6461
gene-BSU_36970	spoIIR	regulator signal of pro-sigma(E) spoIIGA endopeptidase (stage II sporulation)	12.9958	-1.31377	-2.65501	1.14848	-1.74959	4.42667	225.718	223.66	65.4063	29.237	25.7846
gene-BSU_37030	racA	chromosome-pole-anchoring protein RacA	4.17972	-1.77496	-4.17615	2.87356	-2.12203	715.336	4581.67	4825.3	581.341	523.296	533.864
gene-BSU_37210	ywjC	conserved protein of unknown function	6.16285	-1.4465	-1.84102	-1.64261	-1.33545	14.1134	77.5301	42.9482	26.3515	5.08408	3.05039
gene-BSU_37300	ywiC	putative integral inner membrane protein	-1.02344	2.13762	-1.63966	-1.39786	-1.04782	4.25922	6.76593	8.50255	2.25838	1.50603	4.16378
gene-BSU_37470	phrF	secreted regulator of the activity of phosphatase RapF	2.57823	1.82491	-1.61104	-2.03508	-1.00068	34.0737	71.3923	164.286	83.3547	15.9036	18.043
gene-BSU_37480	ywhH	putative tRNA editing enzyme	2.45373	1.46648	-1.23422	-2.64364	1.16815	104.51	258.352	390.085	269.342	49.7789	69.9234
gene-BSU_37620	psrF	prespore-specific transcription regulatory gene	18.5318	1.15856	-5.27488	1.84901	-1.50117	3.54197	1193.6	2088.82	202.295	194.372	179.412
gene-BSU_37740	bacA	prephenate decarboxylase	1.15681	1.29822	-3.75424	2.2949	-1.02021	17.772	13.5205	15.5218	2.24336	2.46841	7.98904
gene-BSU_38070	sacT	transcriptional antiterminator of sacAP expression	4.53507	-2.00954	-2.81659	4.55629	-3.13549	215.173	4608.89	4243.79	531.634	384.986	687.85
gene-BSU_38080	ywcI	conserved protein of unknown function	4.22536	-1.59823	-3.17362	4.18135	-2.95336	98.095	1829.78	2447.43	207.502	193.392	381.199
gene-BSU_38090	vpr	extracellular serine protease	3.76276	-1.87585	-2.17103	1.39823	-1.16456	760.366	1450.85	1400.05	327.738	168.388	270.259
gene-BSU_38180	ywzA	conserved protein of unknown function	4.88852	1.04655	-2.16671	1.03526	-1.43833	38.3569	223.634	174.62	76.7147	59.4182	40.6222
gene-BSU_38350	ywbE	conserved protein of unknown function	1.78284	3.08431	-2.8455	1.01487	1.06011	6.35407	6.78714	30.9183	8.95885	4.81928	5.46759
gene-BSU_38430	gspA	putative glycosyl transferase (general stress protein)	4.518	-1.57239	-3.19463	2.27471	-2.76906	61.1884	252.656	62.4246	37.313	50.8292	19.5374
gene-BSU_38620	aag	3-alkylated purines and hypoxanthine DNA glycosidase	5.50668	1.02421	-2.07522	1.02055	-1.01684	2.79402	16.7698	22.6481	7.33686	4.62358	3.94537
gene-BSU_39040	yxiS	conserved protein of unknown function	3.10533	3.55892	-5.48363	1.86175	-1.85796	14.8617	28.5742	65.2511	10.1595	19.0784	20.0319
gene-BSU_39050	katE	catalase 2	4.54045	2.43735	-5.73502	1.75378	-3.7431	12.8191	64.0629	51.0996	14.751	20.2031	7.63663
gene-BSU_39840	yxbG	putative oxidoreductase	4.22232	1.34101	-4.99013	1.57206	-2.68799	4.49597	26.1577	9.34091	3.23696	5.06553	2.53271
gene-BSU_40000	yxnA	putative oxidoreductase	3.8304	1.14529	-2.22899	-1.07111	-1.2268	7.85583	39.133	18.3106	14.1242	6.6822	4.58754
gene-BSU_40250	yycR	putative dehydrogenase	1.60226	-1.23407	1.1251	1.28503	-2.07459	431.865	775.085	682.853	224.844	207.5	354.413
gene-BSU_40350	rocR	transcriptional regulator (NtrC/NifA family)	1.72612	1.4869	-2.0603	-1.02723	1.04699	32.1675	55.8121	82.2742	22.5749	13.7068	24.3939
gene-BSU_40939	yyzM	putative nucleic acid binding protein	1.84938	1.62498	-2.11876	1.10866	1.13627	12.1556	15.4186	49.123	7.37915	2.93348	14.0804
gene-BSU_40940	yyaD	putative transporter	11.4732	1.99026	-9.89974	5.41371	-1.36117	1.00513	15.0308	55.3998	1.3566	6.52522	10.3992
gene-BSU_06050	ydiN	putative N-terminus of restriction enzyme; defective prophage 3	2.51586	1.08721	-3.39036	2.91136	-2.47899	11.6491	20.9977	22.097	5.01862	6.82732	5.01196
gene-BSU_18819	yozU	putative phage protein	2.02054	1.33078	-3.23503	1.42368	1.37198	3.32246	10.6467	11.6913	2.77598	2.44358	5.08255
gene-BSU_35230	swrAAc	swarming motility protein fragment; C-terminal part of swrAA	1.02908	1.43686	-2.32551	2.37207	1.04787	24.3549	9.91043	25.7104	8.86636	11.2592	6.63257
gene-BSU_40579	yyzL	hypothetical protein	2.05804	1.93696	-2.22827	-1.52698	2.06339	9.4358	22.3976	42.1957	21.3519	4.91567	16.6551

## Sheet: cluster 7
Table S7. List of the differentially expressed genes in cluster 7
Gene_ID	Gene_Symbol	Description	fold change					Transcripts per millions mapped reads (TPM)
			10H/8H	12H/10H	15H/12H	18H/15H	24H/18H	8H	10H	12H	15H	18H	24H
gene-BSU_00160	sleL	spore peptidoglycan N-acetylglucosaminidase	35.7295	2.31207	-2.29217	-1.48406	1.60395	1.46975	1615.25	4495.13	1573.92	570.004	645.71
gene-BSU_00190	dnaX	DNA polymerase III subunit tau subunit	3.02609	2.23954	-1.88384	-1.55995	1.65915	48.1921	139.886	268.905	103.119	33.9401	90.1168
gene-BSU_00200	ebfC	nucleoid associated protein	1.54969	2.03295	-1.80564	1.06621	1.49061	59.2164	74.9178	154.359	61.7442	28.1125	99.9821
gene-BSU_00240	csfB	forespore-specific anti-sigma factor	15.878	1.23506	-1.8526	2.70397	-1.29335	4.03239	59.8704	167.612	68.7305	75.8481	69.1828
gene-BSU_00400	yabE	putative cell wall shaping enzyme	4.04554	1.04429	-2.48298	1.82188	2.93405	27.1082	177.698	242.896	34.1991	32.5467	120.16
gene-BSU_00410	rnmV	ribonuclease M5	3.06352	1.24686	-1.39121	1.11905	2.00476	6.16719	22.0083	32.5521	12.4721	7.3449	20.4849
gene-BSU_00530	pth	peptidyl-tRNA hydrolase	2.85872	1.75974	-1.37786	-1.56209	1.7195	60.0485	131.097	328.664	204.482	71.2948	118.231
gene-BSU_00540	fin	protein required for the switch from F to G during sporulation (anti sigma F)	3.51553	2.01869	-1.32431	1.06461	1.12854	71.1429	223.612	554.734	334.677	227.946	218.103
gene-BSU_00550	mfd	transcription-repair coupling factor	2.53804	1.80231	-1.74346	-1.24923	1.30569	89.245	209.003	373.406	172.639	81.3346	104.578
gene-BSU_00620	divIC	cell-division initiation protein	4.18487	1.64087	-2.93015	1.50076	-1.08657	68.0226	196.423	494.095	85.121	67.5847	159.501
gene-BSU_00630	yabR	putative RNA degradation protein; polyribonucleotide nucleotidyltransferase or phosphorylase	2.5503	1.44691	-2.36438	1.63817	-1.05226	128.615	234.393	523.089	99.9479	85.178	221.853
gene-BSU_00670	tilS	tRNA(ile2) lysidine synthetase	4.71954	1.5579	-2.25252	1.26911	1.35672	108.001	436.883	717.545	222.443	170.132	266.611
gene-BSU_01530	cwlD	N-acetylmuramoyl-L-alanine amidase	19.2141	3.27823	-1.16041	-2.07041	1.3076	1.10128	109.753	464.304	339.602	77.2098	92.6062
gene-BSU_01570	pdaB	polysaccharide deacetylase involved in sporulation	27.9477	1.63119	-9.54	3.34615	-1.4513	0.719506	517.779	1199.55	55.4571	137.775	121.702
gene-BSU_01800	alkA	DNA-3-methyladenine glycosylase; prophage 1 region	4.23513	2.45244	-1.39689	-1.59935	2.16061	12.7604	29.931	89.9935	55.1628	15.5041	39.2637
gene-BSU_01860	ybcF	putative enzyme; prophage 1 region	1.33019	2.02312	-1.38737	-1.09889	-1.05864	1.34031	1.74981	2.94772	1.39982	1.31435	1.26175
gene-BSU_02100	cypC	fatty acid beta-hydroxylating cytochrome P450	3.25416	2.30671	-1.21848	-1.7728	1.38312	5.45531	17.7493	27.9672	23.0651	9.6501	7.5041
gene-BSU_02590	ycbP	putative inner integral membrane protein	3.80999	1.0653	1.29779	-2.09954	1.86395	11.175	38.4144	39.6808	44.3081	12.2163	14.4172
gene-BSU_02840	ycdG	putative oligo-carbohydrate hydrolase	2.59254	1.60535	-1.6996	2.68966	-2.58316	7.04234	19.0798	11.7545	8.91369	23.7963	12.5951
gene-BSU_03100	ycgG	conserved protein of unknown function (similar to phage protein)	10.4633	2.06043	1.13587	2.03993	-1.11404	2.68297	96.7769	290.446	155.71	353.933	238.57
gene-BSU_03652	yclD	putative FMN-binding enzyme subunit	2.31938	2.04966	-1.57916	1.00474	-1.07398	4.73481	8.30878	16.066	8.37123	7.18229	4.11901
gene-BSU_03670	dtpT	di-tripeptide-proton ABC symporter	3.23945	1.60675	-1.48276	-1.35285	1.06253	46.9982	220.114	422.897	130.364	77.5387	94.5366
gene-BSU_03730	yclH	putative ABC transporter (ATPase component)	2.70982	2.62819	-1.8217	1.39487	1.39568	0.46186	1.85002	3.8091	2.38771	1.65596	2.3234
gene-BSU_03770	rapC	response regulator aspartate phosphatase	3.15666	1.57628	-1.03836	-1.23617	1.33458	92.3871	310.013	457.121	403.367	167.417	224.242
gene-BSU_04200	lyxE	D-lyxose ketol isomerase	2.96038	8.15964	-5.04298	1.14911	-2.22065	1.09211	4.49951	8.44078	5.37709	4.30293	4.95688
gene-BSU_04220	ydaG	putative general stress protein	4.98817	1.29064	-2.03868	-1.2676	1.41977	60.9721	256.54	210.709	153.645	56.2933	75.4008
gene-BSU_04240	ydzA	conserved protein of unknown function	3.6326	3.7898	-2.47371	-2.01207	-1.63317	111.868	139.119	477.082	172.204	71.6931	76.6937
gene-BSU_04380	ydaT	conserved protein of unknown function	4.74926	1.83198	-2.01379	1.49891	-1.75311	2.6037	14.2766	8.01677	7.72281	11.7769	9.00773
gene-BSU_04480	ydbI	putative integral inner membrane protein	5.87704	1.79983	-1.26429	-1.49279	1.5513	70.1935	435.429	935.12	540.981	215.303	325.827
gene-BSU_04610	ydcA	putative rhomboid protease	3.19363	2.2538	-2.88512	1.96046	-1.16543	19.1337	69.0125	186.768	22.1732	45.6868	56.905
gene-BSU_04640	alrA	D-alanine racemase	2.38627	1.7333	-2.0076	1.27125	-1.10642	43.0794	102.153	192.798	37.2711	39.2216	69.9657
gene-BSU_04960	conG	ICEBs1 mobile element: VirB6 subunit of the conjugation machinery	4.72365	1.36009	-1.35606	1.05817	-1.10453	0.321208	1.30378	1.39872	0.885638	0.637846	0.442231
gene-BSU_05170	ydeE	putative transcriptional regulator (AraC/XylS family)	2.41338	1.76984	-1.31159	1.12104	1.32362	16.1226	25.4955	44.8081	31.7203	19.774	23.8475
gene-BSU_05430	ydfJ	putative proton metabolite efflux transporter	6.62541	4.24189	-3.33975	1.87967	-1.25981	0.72305	5.79247	18.8915	5.34648	9.73163	5.93458
gene-BSU_05640	ydgG	putative transcriptional regulator (MarR family)	2.67439	1.10619	-1.22328	-1.54072	1.43041	1.71311	8.41739	6.32958	3.6499	0.944958	3.08428
gene-BSU_05710	spoL	spore cortex lytic enzyme	53.4129	4.17401	1.18424	-2.69596	2.27665	1.55645	117.374	407.317	537.68	124.935	191.409
gene-BSU_05730	ydhF	putative phosphate-starvation lipoprotein	14.6055	2.1248	-1.94909	-1.29077	1.53084	2.43305	54.1038	151.918	61.2629	20.5582	20.6139
gene-BSU_05740	phoB	alkaline phosphatase III (promiscuous, heptaprenylglyceryl phosphate is a substrate)	14.3244	2.18219	-1.72573	-1.36596	1.76655	7.92544	124.868	373.057	167.332	65.6068	78.3594
gene-BSU_06269	ydzJ	hypothetical protein	2.20677	1.36411	-1.06419	-1.48353	1.51677	4.94539	16.3756	18.9248	14.2553	5.183	12.5699
gene-BSU_06280	ydjP	putative aminoacrylate hydrolase	2.76539	2.21095	-1.16217	-1.69496	1.5756	264.322	469.876	1052.48	759.455	305.688	285.239
gene-BSU_06290	yeaA	conserved hypothetical protein	2.34093	1.70102	-1.3765	-1.0164	1.27714	135.66	241.283	402.672	266.476	155.794	170.925
gene-BSU_06800	yezA	hypothetical protein; HGT island	3.75844	-1.49869	1.19414	1.24515	1.09784	0.759726	6.0863	5.51381	1.66626	1.67627	5.63216
gene-BSU_06890	cotJA	component of the inner spore coat	38.0336	3.15291	-1.09521	-3.38151	2.17475	13.2632	746.136	2393.56	2215.54	438.09	496.309
gene-BSU_06900	cotJB	component of the inner spore coat	61.2842	3.3253	-1.36454	-2.94746	2.24108	2.97847	791.869	2598.32	2324.45	439.65	664.312
gene-BSU_06910	cotJC	enzyme component of the inner spore coat	49.5532	3.12313	-1.29018	-2.97097	1.98145	9.65652	1865.04	5720.81	4209.88	911.758	1066.07
gene-BSU_06920	yesJ	putative acetyltransferase	15.0511	2.71207	-1.49664	-2.37951	1.69961	106.001	2106.73	6027.44	3416.58	897.825	1100.99
gene-BSU_06930	yesK	putative membrane component	4.97532	2.91644	-2.18999	-1.75604	1.44366	7.26629	41.5797	126.361	41.468	18.3228	27.2089
gene-BSU_07100	lplA	lipoprotein transporter binding protein for alpha-galacturonides	1.38148	1.94026	-2.08745	1.14602	1.16995	16.2578	18.1452	32.2488	10.547	9.08286	14.7346
gene-BSU_07140	yetF	conserved membrane protein	11.5232	2.43143	-2.09354	-1.73601	1.98806	7.56943	54.6665	156.236	76.8132	20.939	35.2964
gene-BSU_07660	yflJ	conserved hypothetical protein	15.6236	3.48485	-1.32571	-1.5427	2.07831	30.1991	506.989	3417.31	1420.01	540.598	677.67
gene-BSU_07810	treA	trehalose-6-phosphate hydrolase	1.54106	3.00626	-2.73517	1.09188	1.11406	8.39484	12.9523	16.6164	9.79044	7.48618	9.0882
gene-BSU_07830	hypO	NAD(P)H-flavin oxidoreductase (nitroreductase)	2.65868	1.8212	-1.1471	-1.50481	1.60886	34.9474	91.1793	167.636	131.766	40.1824	70.5217
gene-BSU_07850	sufLB	general stress protein 18; deglycase	3.72512	1.8335	-2.30691	-1.01254	-1.17019	59.2389	259.093	174.333	139.561	81.6493	58.2448
gene-BSU_07880	yfkJ	protein-tyrosine-phosphatase	2.84094	1.62415	-1.48045	-1.52884	1.10892	24.5411	58.8471	47.5841	50.9475	18.1414	24.0456
gene-BSU_07920	chaA	H+/Ca2+ antiporter	5.73359	1.8807	-1.21018	-2.3173	1.88008	10.7225	52.8125	97.2749	81.9362	20.1671	22.2384
gene-BSU_08160	yfjB	putative phage protein	1.22789	2.18685	-1.27176	-1.64659	-1.04074	12.8483	20.1057	22.7187	21.0138	9.07159	13.1989
gene-BSU_08170	yfjA	conserved hypothetical protein	3.49553	1.22201	-1.69546	1.14429	1.35941	1.74737	5.86603	7.90552	4.37988	2.75388	3.9655
gene-BSU_08330	bifN	ABC transporter (permease) biofilm formation	6.29858	2.64152	-1.94871	-1.57488	1.91472	1.96919	10.4445	34.4074	12.2546	5.76816	7.33515
gene-BSU_08400	yfiU	putative efflux transporter	9.40491	3.42633	-1.1626	-2.50068	1.84554	4.04016	42.0224	115.555	103.294	32.7878	36.0486
gene-BSU_08510	yfhF	putative nucleotide-or NAD-binding protein	2.68732	1.0235	-1.3007	-1.0534	-1.04313	8.1908	22.1029	19.455	11.3999	7.51428	7.76143
gene-BSU_08920	yhbB	conserved hypothetical protein	62.5664	3.03121	-1.03338	-2.10948	1.87809	0.252025	48.1871	224.924	196.937	50.6488	68.2397
gene-BSU_08970	prkA	serine protein kinase (involved in sporulation)	45.7542	2.03656	-3.31172	-1.0831	1.15177	1.41006	1297.12	3971.88	635.464	403.516	378.386
gene-BSU_08980	yhbH	factor involved in shape determination	38.5264	1.86026	-3.87339	2.15151	1.05817	3.66814	356.837	1070.78	184.599	266.054	370.749
gene-BSU_09390	ygxB	putative integral membrane protein	4.97515	2.24682	-2.02651	1.14083	-1.50662	3.1756	13.7707	9.69426	9.05876	10.1179	5.12002
gene-BSU_09400	spoVR	involved in spore cortex synthesis (stage V sporulation, conserved in non sporulating bacteria	54.7665	1.96209	-3.19436	1.31235	-1.11727	0.950063	545.195	1501.61	291.37	293.843	212.894
gene-BSU_09760	yheE	conserved hypothetical protein (sporulation / germination island)	3.17433	1.9788	-2.07519	-1.04208	1.15172	5.38573	27.6134	68.2257	25.8743	10.8929	11.4076
gene-BSU_09770	spaD	spore coat associated protein	90.3524	4.78016	1.80446	-3.47044	3.05634	3.17529	290.515	1398.47	3700.48	569.27	731.749
gene-BSU_09780	spaC	spore coat associated protein, subunit C	112.781	5.2131	1.90706	-3.47585	2.87881	1.29613	258.587	1308.88	4053.98	626.295	844.195
gene-BSU_09830	yhaX	putative hydrolase	55.5979	2.03299	-2.81539	-1.42699	1.69492	17.3225	1303.46	4385.92	1002.3	499.121	574.669
gene-BSU_09840	hemZ	coproporphyrinogen III oxidase	5.91153	2.73015	-2.27729	-1.2317	1.39084	8.82387	71.6098	185.817	54.3777	29.1173	44.6238
gene-BSU_09889	yhzD	conserved hypothetical protein	2.27405	1.1642	-1.02546	-1.17046	1.36298	26.6333	57.8002	49.6485	51.1281	27.2834	40.2946
gene-BSU_10009	yhzF	membrane protein of unknown function	48.806	2.26471	-4.28671	-1.37919	-1.09782	1.63816	580.062	1566.13	211.723	131.476	97.1548
gene-BSU_10280	yhfM	putative membrane protein	40.4187	3.71028	1.20171	-4.44892	3.33665	1.98565	134.046	606.052	853.331	82.8041	162.556
gene-BSU_10390	yhfW	putative oxidoreductase with Rieske [2Fe-2S] center	41.1285	2.53437	-2.43491	-1.53988	1.95723	0.976472	71.0903	251.736	82.9602	33.8484	41.2568
gene-BSU_10400	yhxC	putative oxidoreductase	39.6451	3.29128	-1.00838	-2.85946	2.33552	1.64962	457.447	1399.91	1375.18	256.046	371.634
gene-BSU_10420	comK	competence transcription factor (CTF)	1.52116	2.64944	-1.5276	-1.38472	1.59074	57.0385	88.7779	169.349	123.397	53.5615	70.3312
gene-BSU_10780	yisN	conserved hypothetical protein	8.17135	3.48667	-2.07635	-1.5233	2.02676	2.00591	13.9985	74.2907	26.4804	11.4335	17.9864
gene-BSU_11290	yjaV	putative NAD(P) binding enzyme	38.4255	2.95129	-1.62274	-1.70169	2.15929	0.140917	32.2116	107.107	58.2807	18.3444	27.0123
gene-BSU_11490	yjbC	putative thiol oxidation management factor; putative acetyltransferase	2.62884	1.17389	1.20496	-1.70784	-1.09564	185.918	402.402	310.204	391.381	125.401	182.372
gene-BSU_11510	yjbE	putative membrane protein of unknown function	16.9217	1.46601	-5.60577	2.8381	-1.51461	1.79524	217.072	500.953	22.8744	68.3942	66.2909
gene-BSU_11730	cotO	spore outer coat protein	42.1165	2.27732	-1.02884	-2.68831	1.98861	3.56372	753.831	2683.04	1998.25	445.657	492.47
gene-BSU_11790	yjcA	sporulation-specific protein	49.6826	4.26338	-1.14909	-1.70496	1.6939	3.30385	367.254	1421.54	1307.06	558.753	513.883
gene-BSU_11839	yjzE	hypothetical protein	4.81595	-1.07176	-1.14908	3.26164	-2.30596	5.24211	29.3145	27.2624	19.7095	56.6408	31.0242
gene-BSU_12000	manR	transcriptional DNA-binding activator	1.74016	2.56571	-3.14421	1.28518	1.54255	3.15011	5.00408	10.3387	2.55606	2.67326	5.60303
gene-BSU_12050	yjdH	putative spore coat protein	28.0596	3.86191	1.23201	-3.47084	2.63175	22.0407	629.083	2609.19	4154.3	601.315	855.678
gene-BSU_12110	yjfA	conserved hypothetical protein	30.8361	3.87388	-1.00638	-3.8566	2.2967	66.0241	1651.82	6773.51	6747.69	838.738	1756.87
gene-BSU_12320	yjmC	putative oxidoreductase	16.5685	1.60703	-3.17558	-1.39569	1.64918	10.0034	79.8493	296.238	54.6676	20.2324	24.6377
gene-BSU_12380	uxaB	tagaturonate reductase (altronate oxidoreductase)	1.80702	2.24907	-1.93657	1.23068	-1.40446	3.92341	4.0162	10.642	3.68784	4.02776	3.00092
gene-BSU_12390	uxaA	altronate dehydratase	2.13042	2.09695	-1.40832	2.15858	-2.45039	6.10527	12.2557	28.8916	12.269	33.3576	9.81024
gene-BSU_13160	ohrB	organic hydroperoxide resistance reductase B	5.08457	2.32554	-2.7805	-1.35828	1.14252	54.9083	323.089	316.581	217.356	92.3403	62.2034
gene-BSU_13170	guaN	guanine deaminase	4.05074	1.65533	-1.28957	-1.95275	1.90526	5.00839	16.2275	35.6881	25.4215	6.99871	7.60265
gene-BSU_13520	ykrP	putative integral membrane protein; putative acyltransferase	11.676	2.65169	-1.01904	-1.96693	1.91396	1.92159	23.5634	62.3776	58.5697	16.9594	30.282
gene-BSU_13800	ykvR	conserved hypothetical protein (HGT island)	1.18484	2.02822	-1.88431	-1.24586	2.66441	4.05318	3.17491	11.0535	1.52393	1.7886	6.58192
gene-BSU_13810	ykvS	conserved protein of unknown function (HGT island)	6.22328	2.30831	-3.3029	-1.32492	1.86033	13.528	40.1892	166.239	41.8562	16.3234	42.5332
gene-BSU_13830	ykvU	spore membrane protein involved in germination	29.3047	1.68268	-6.01254	2.23286	-1.44936	0.881521	222.72	538.031	25.7416	56.6644	63.5459
gene-BSU_13840	stoA	spore-specific thiol-disulfide oxidoreductase (SpoVD maturation)	16.1348	2.09731	-1.6587	-1.50065	1.29018	5.84211	219.085	602.974	233.506	93.018	111.703
gene-BSU_14200	ykuS	conserved hypothetical protein	9.03128	3.25768	-1.91812	-2.18758	2.69249	48.2658	190.175	1239.64	622.731	117.073	242.718
gene-BSU_14250	sppO	spore protein cse15	166.906	2.78785	-1.88357	-1.87025	1.73109	0.732593	332.66	1155.64	574.401	174.437	199.223
gene-BSU_14330	yknV	putative ABC transporter (ATP-binding protein)	4.56709	2.43313	1.10179	-2.34368	1.90009	39.1209	180.245	366.79	395.438	90.2122	133.654
gene-BSU_14710	ylaA	conserved protein of unknown function	3.0853	1.26316	-1.4672	1.50978	-1.45875	0.324087	0.475992	1.06914	0.3554	0.22346	0.600648
gene-BSU_14730	sigP	RNA polymerase ECF-type sigma factor	1.73771	2.23509	-1.7775	-1.17382	1.88029	2.25953	2.41353	8.54727	3.68137	1.74491	5.42408
gene-BSU_14740	sigQ	anti-SigP(YlaC) sigma factor	4.20929	1.96994	-3.10336	1.48879	1.8758	1.33727	6.57072	19.0579	4.02234	4.42587	9.63051
gene-BSU_14810	ylaK	putative phosphate starvation inducible protein	30.2182	2.10537	-3.33788	1.1391	1.2337	3.07664	349.678	1002.54	224.827	127.51	164.045
gene-BSU_14830	glsB	L-glutamine amidohydrolase; glutaminase	17.9717	2.34063	-5.30977	1.67985	-1.175	7.10222	291.981	853.732	101.779	103.21	117.213
gene-BSU_14840	ylaN	conserved hypothetical protein	2.34972	1.65817	-1.88101	1.1836	1.32004	51.8634	95.9045	229.596	82.8217	48.7568	151.195
gene-BSU_14960	ylbC	conserved hypothetical protein	4.41058	1.93494	-2.89623	-1.21272	1.68281	54.8382	157.735	382.048	94.3821	48.2067	88.5553
gene-BSU_15090	gerR	DNA-binding regulator	18.8517	1.79699	-4.20236	1.78905	1.19766	5.26913	408.698	1156.69	139.27	162.837	196.456
gene-BSU_15110	panE	2-dehydropantoate 2-reductase	2.83962	2.25326	-2.54946	1.10902	1.66834	14.6393	48.9713	140.313	24.939	18.8097	54.3102
gene-BSU_15120	bshC	malate glucosamine cysteine ligase	1.18457	2.09214	-1.9132	1.04533	1.40747	68.7785	82.5392	183.886	49.5779	29.2102	83.9438
gene-BSU_15170	spoVD	transpeptidase penicillin-binding protein	25.2896	1.88989	-5.02751	1.59047	-1.10872	1.74197	258.161	731.077	72.9332	67.9094	63.2826
gene-BSU_15220	murG	UDP-N-acetylglucosamine-N-acetylmuramyl-(pentapeptide)pyrophosphoryl-undecaprenol N-acetylglucosamine transferase	2.22158	1.70788	-1.78128	1.83947	-1.55591	69.6308	194.902	375.512	85.9582	160.188	154.502
gene-BSU_15330	sigG	RNA polymerase sporulation-specific sigma factor (sigma-G)	5.07534	1.14149	1.37517	-3.19472	2.44714	152.343	1072.79	1158.98	1444.48	139.648	287.051
gene-BSU_15360	ylmC	essential sporulation protein	2.10331	1.77666	-1.84062	1.68726	-1.37471	32.923	47.1168	132.02	35.6533	51.4841	48.4082
gene-BSU_15690	rpoZ	omega subunit of RNA polymerase	1.64922	1.65891	-2.28641	1.73559	1.11031	34.6904	34.9962	89.0097	20.5307	26.1517	60.0074
gene-BSU_15810	spoVM	factor required for normal spore cortex and coat synthesis (stage V sporulation)	29.9431	2.79576	-1.24859	-1.11725	-1.03607	4.85381	205.311	1210.53	597.368	388.756	244.686
gene-BSU_16130	trmFO	tRNA:m(5)U-54 methyltransferase	1.82471	2.1994	-1.65434	-1.42954	1.45315	70.0952	108.456	190.068	103.369	34.0555	70.988
gene-BSU_16720	ymxH	PRC barrel protein involved in sporulation	65.115	3.02128	-2.12496	-1.39301	1.13276	4.87638	1338.32	4008.83	1931.61	1059.63	703.969
gene-BSU_17270	pghC	gamma-polyglutamate hydrolase (phage origin)	2.54816	2.74294	-2.8866	1.23125	2.23082	0.999555	1.8981	4.54316	1.46151	0.673883	2.94052
gene-BSU_17320	ymaF	putative sporulation-related protein of unknown function	52.599	5.16196	-2.32019	-1.44181	1.39417	1.51945	377.35	1147.12	695.426	325.616	407.93
gene-BSU_17330	miaA	tRNA isopentenylpyrophosphate transferase	18.5721	5.42224	-4.13489	1.18406	1.15682	7.32231	199.534	616.191	182.495	152.886	188.317
gene-BSU_17350	ymzC	conserved protein of unknown function	1.80693	2.325	-1.75699	1.30257	-1.02122	17.2817	25.8434	52.07	24.9076	17.7943	20.1326
gene-BSU_17420	spoVK	mother cell sporulation ATPase	50.5963	4.2816	1.40915	-1.49395	1.42301	0.324589	30.944	159.227	298.591	136.701	118.597
gene-BSU_17600	xylA	xylose isomerase	2.25584	1.10118	1.27505	-2.03676	1.75066	14.692	26.1765	32.4928	34.1749	7.00201	13.1946
gene-BSU_17640	alrB	alanine racemase (minor activity)	41.397	3.36665	-1.56749	-2.95146	1.83658	0.398135	72.5086	294.468	221.004	39.3473	48.6301
gene-BSU_17720	yndA	putative exported protein of unknown function	39.376	2.53548	-2.14525	-1.7651	1.52572	0.591216	637.194	1648.2	653.154	259.372	300.126
gene-BSU_17740	ynzB	conserved protein involved in spore germination	28.7658	2.54294	-1.87201	-1.29158	1.1505	9.56893	583.048	1645.34	698.696	378.199	304.903
gene-BSU_17750	yndD	spore germination receptor subunit	23.5405	2.53038	-1.4472	-2.20704	2.1045	0.955855	22.1396	53.9047	41.1087	8.79681	14.7051
gene-BSU_17760	yndE	putative spore germination integral inner membrane protein	15.1209	2.38572	-1.511	-2.35186	2.1703	0.504049	12.2294	26.225	19.5831	3.97194	6.86337
gene-BSU_17770	yndF	putative spore germination lipoprotein	4.84859	2.46922	-2.21929	-1.84047	2.0957	1.16491	4.21683	13.92	5.10987	1.53503	3.08428
gene-BSU_18040	yneP	acyl-CoA thioesterase	2.98322	2.99448	-1.56388	-1.51934	2.1681	1.50388	4.81915	17.0098	10.2317	2.84417	10.6939
gene-BSU_18130	eglS	endo-1,4-beta-glucanase	2.18306	1.88478	-1.14052	-1.11997	1.23337	7.49622	15.7343	24.9715	19.151	10.3807	12.6579
gene-BSU_18200	nrnB	oligoribonuclease (nanoRNase)	16.515	3.70324	-1.16407	-3.10456	2.98541	2.49	50.1846	190.832	133.901	25.9157	33.449
gene-BSU_18210	ldeE	methylcrotonoyl-CoA carboxylase subunit (leucine degradation)	47.8731	2.97492	-4.79924	1.18859	1.13934	5.68237	1628.53	5179.14	572.165	560.27	422.775
gene-BSU_18220	ldeF	methylglutaconyl-CoA hydratase (leucine degradation)	50.2956	3.31961	-5.30355	1.16392	1.26982	4.11737	991.479	3212.05	375.122	323.003	270.353
gene-BSU_18230	ldeG	hydroxymethylglutaryl-CoA lyase (leucine degradation)	57.516	3.29439	-4.77679	1.0829	1.40949	1.31053	1277.87	4081.57	566.429	434.458	357.252
gene-BSU_18239	lgeHB	methylcrotonyl-CoA carboxylase; biotinylated subunit (leucine degradation)	62.7276	3.39725	-4.52005	1.07313	1.37291	0.354197	428.656	1574.63	189.992	161.576	121.912
gene-BSU_18240	ldeHA	biotin carboxylase for subunit LdeHB of methylcrotonyl-CoA carboxylase	50.5911	3.08784	-4.7675	1.20732	1.42965	2.59161	1255.9	3694.16	566.629	411.675	370.779
gene-BSU_18250	ldeI	acetoacetyl-CoA synthetase	48.0177	2.83048	-3.85806	1.14311	1.60252	2.62106	1449.33	4412.88	803.102	550.529	515.905
gene-BSU_18260	ldeJ	isovaleryl-CoA dehydrogenase (leucine degradation)	46.9138	2.48438	-3.03099	1.09411	1.50899	1.30709	1248.11	3702.95	758.591	542.454	529.452
gene-BSU_18410	ggt	membrane bound gamma-glutamyltranspeptidase	3.70006	-1.19279	-1.10391	-1.85614	1.31751	81.5291	175.267	239.283	183.464	41.1606	55.045
gene-BSU_18470	proJ	glutamate 5-kinase	6.16162	2.08172	-1.23288	-1.35694	2.15374	12.8234	108.676	286.269	154.621	54.2558	71.9334
gene-BSU_18480	proH	pyrroline-5-carboxylate reductase	6.56309	2.16824	-1.10579	-1.59353	2.39028	18.6464	122.416	319.52	226.582	54.0957	100.881
gene-BSU_18760	yoaU	putative transcriptional regulator (LysR family)	5.15081	2.68629	-1.90717	-1.54197	1.84679	3.51275	18.8571	40.8859	24.778	8.0487	12.0192
gene-BSU_18780	yoaW	biofilm forming exported protein	4.06635	2.02123	-1.55418	1.05688	1.47146	8.91887	36.746	93.9123	36.6131	22.8916	49.3485
gene-BSU_18830	yppS	putative PEP-dependent enzyme	2.15505	2.07289	-1.45509	1.04509	-1.00717	31.7731	56.446	81.0612	59.2762	34.4854	33.5215
gene-BSU_19020	yobN	putative amine oxidase (flavoprotein)	12.9648	1.92488	-5.96007	2.98634	-1.50899	1.09439	25.4837	62.1693	5.72631	9.29649	8.7506
gene-BSU_19110	yobW	mother cell-specific membrane sporulation protein	29.8047	2.18581	1.05513	2.0633	-1.40865	2.44824	149.522	373.232	253.047	502.927	436.815
gene-BSU_19250	yocL	conserved protein of unknown function	6.49072	2.46713	-4.63862	1.18206	1.29327	14.8763	59.5251	154.861	23.971	19.0166	35.0108
gene-BSU_19259	yoyB	conserved protein of unknown function	23.1753	3.77363	1.24234	-3.26871	2.35637	12.0707	229.501	688.092	1500.69	249.778	273.568
gene-BSU_19260	yocM	putative chaperone	5.54258	2.01902	-2.37089	-1.34169	1.38303	18.7925	74.1303	153.356	53.0958	24.5511	40.503
gene-BSU_19270	yozN	conserved protein of unknown function (mother cell in sporulation)	21.2835	4.01598	1.15618	-2.79479	2.40589	10.7225	191.207	922.048	1468.32	256.627	386.096
gene-BSU_19280	yocN	conserved protein of unknown function (sporulation-related)	52.701	3.62795	1.36733	-2.69047	2.10968	8.06479	564.247	2872.02	4306.18	816.313	1119.95
gene-BSU_19320	sqhC	squalene-hopene cyclase, sporulenol synthase (spore protection)	10.5122	2.63876	-1.26317	-2.14723	1.78651	35.5685	385.677	1006.62	834.384	215.863	214.35
gene-BSU_19330	sodF	superoxide dismutase (Fe2+-dependent)	17.5779	3.00791	-1.29694	-2.35568	2.09578	16.0795	260.809	836.211	655.468	153.192	166.846
gene-BSU_19680	yozE	conserved protein of unknown function	9.84451	3.13731	-1.90249	-1.79563	2.55329	19.5706	207.924	1024.23	429.886	133.783	169.142
gene-BSU_19689	yokU	conserved protein of unknown function	52.1884	3.31147	-1.62474	-1.93896	2.35678	0.845502	206.214	866.525	429.688	147.377	136.405
gene-BSU_19690	kamA	lysine 2,3-aminomutase	55.8561	2.99547	-1.55069	-1.78402	2.18349	4.38694	539.891	1878.16	1182.81	398.204	380.974
gene-BSU_19700	kamB	epsilon-amino-beta-lysine acetyl transferase	50.3356	2.84629	-1.75938	-1.53697	1.96968	3.51373	424.418	1460.66	735.594	288.214	272.858
gene-BSU_19710	yodQ	putative deacetylase	39.9282	2.63963	-1.89828	-1.5384	2.05832	4.25847	337.565	1090.78	466.578	190.301	187.958
gene-BSU_19720	yodR	putative acyloate-acetoacetate CoA-transferase	47.0612	2.82298	-2.0796	-1.39154	2.03621	0.240464	203.042	793.747	289.464	138.543	146.305
gene-BSU_19730	yodS	putative oxoacid CoA-transferase	37.5352	2.73191	-1.72975	-1.3416	1.81922	0.569795	253.312	863.463	403.759	194.364	188.637
gene-BSU_19740	yodT	putative aminovalerate aminotransferase	42.3063	2.54614	-1.54654	-1.397	1.75476	0.353401	133.945	492.374	257.441	118.814	127.377
gene-BSU_19940	yotB	putative metallo-dependent hydrolase; phage SPbeta	2.06913	3.13109	-3.37017	1.19355	1.61575	1.51945	0.811506	4.13536	0.714112	0.471452	1.30747
gene-BSU_21200	yomW	conserved protein of unknown function; phage SPbeta	4.88149	1.4709	-1.60115	1.85265	-1.11385	0.930552	1.98795	4.5024	2.2353	2.56648	3.44928
gene-BSU_21350	cwlP	lytic transglycosylase; SPbeta phage protein	2.50964	1.90546	-1.77037	1.1463	1.57977	0.630613	1.26146	1.86096	1.12084	0.733644	1.20214
gene-BSU_21370	yomG	putative DNA wielding protein; SPbeta phage	2.36854	1.51873	-1.89641	1.0737	2.0453	0.568494	1.2784	2.48739	0.787479	0.330088	1.20414
gene-BSU_21960	ypeQ	conserved protein of unknown function	2.72435	1.93241	-1.43754	1.41772	1.10145	10.3124	18.8176	47.0605	34.7339	30.3378	19.5675
gene-BSU_21970	ypeP	ribonuclease	2.72382	1.615	-1.00262	-1.06207	1.18642	22.4002	42.5505	84.562	73.1508	48.5962	38.275
gene-BSU_22160	yptA	hypothetical protein	5.24211	2.17775	-1.90419	1.03063	1.03462	18.8388	104.114	405.312	126.007	92.6206	94.5525
gene-BSU_22490	dapB	(4S)-4-hydroxy-2,3,4, 5-tetrahydro-(2S)-dipicolinic acid (HTPA) dehydratase reductase	-1.04279	2.03088	-1.70378	1.15996	1.11162	47.8245	50.0394	74.2064	20.7758	17.4249	53.3419
gene-BSU_22590	ypiA	conserved protein of unknown function	6.49919	1.65138	-2.22098	-1.06924	1.09779	41.7885	284.262	575.329	185.086	87.0881	106.975
gene-BSU_22800	spoIVA	morphogenetic stage IV sporulation protein	34.0207	2.28567	-3.04757	-1.42381	1.14148	8.66597	7769.58	26126	5258.76	2172.17	2190.22
gene-BSU_22850	yphB	conserved membrane protein of unknown function	10.7604	3.49285	-1.09644	-2.40237	2.79252	2.37478	23.4874	94.3588	81.0756	18.4847	27.8517
gene-BSU_22860	yphA	conserved membrane protein of unknown function	10.4431	1.94143	-1.35006	-1.87221	2.03697	4.19369	36.3961	101.512	68.2441	19.0121	27.3421
gene-BSU_22900	ypfB	conserved hypothetical protein	4.03159	3.23216	-1.45781	-2.08163	3.49453	4.44247	16.1338	85.5872	54.2846	11.5173	26.8176
gene-BSU_23170	spmB	spore maturation protein	21.6927	1.79764	-5.54893	1.86236	-1.60554	1.02499	470.474	1240.67	69.3686	129.717	91.0293
gene-BSU_23200	ypuI	conserved protein of unknown function	11.2645	2.94489	-1.11954	-1.74056	1.88266	3.0579	31.4188	129.508	104.661	37.4298	51.5075
gene-BSU_23300	ypuD	conserved protein of unknown function	3.09948	1.31766	-1.81216	1.10272	-1.10147	8.20505	14.1202	28.5716	8.14087	6.1603	7.24135
gene-BSU_23328	ypzJ	conserved hypothetical protein	2.87502	1.72679	-1.94145	1.42096	-1.32992	11.7758	26.7797	57.6444	22.3755	19.4867	30.5746
gene-BSU_23480	dacF	D-alanyl-D-alanine carboxypeptidase (penicilin binding protein)	90.2179	2.31544	-2.28929	-1.85841	2.56271	0.403239	129.504	442.886	165.214	41.8536	70.3928
gene-BSU_23519	yqzK	conserved protein of unknown function	4.88633	2.45436	-3.20976	1.92903	1.11803	2.75901	18.0507	72.814	11.8862	15.2188	17.8969
gene-BSU_23900	yqjF	conserved protein of unknown function	3.69655	2.26655	-1.59663	-1.7886	1.55378	1.61794	9.56275	19.7841	16.0866	4.81928	5.48316
gene-BSU_24120	mmgF	2-methylisocitrate lyase	44.7394	3.12458	-2.70214	-1.63094	2.1597	8.85257	1098.93	3838.89	1083.15	425.549	475.48
gene-BSU_24130	mmgE	2-methylcitrate dehydratase (promiscuous)	51.9226	3.21197	-2.53764	-1.59187	1.98758	5.98465	1182.32	4139.21	1355.18	532.77	574.948
gene-BSU_24140	mmgD	bifunctional citrate synthase/2-methylcitrate synthase	61.0398	2.63191	-2.32361	-1.35952	1.8985	2.67024	906.937	2850.01	921.185	405.014	440.341
gene-BSU_24150	mmgC	propionyl-CoA dehydrogenase subunit	47.6396	2.7885	-2.65894	-1.2588	1.92578	1.03463	822.006	2570.79	794.863	356.044	411.776
gene-BSU_24160	mmgB	3-hydroxybutyryl-CoA dehydrogenase	50.6097	3.07644	-2.61065	-1.36611	1.95015	0.81908	577.826	2420.46	648.713	297.992	308.621
gene-BSU_24170	mmgA	degradative acetoacetyl-CoA thiolase	45.1754	2.68828	-2.38575	-1.29749	1.89385	0.864815	397.571	1299.72	399.275	197.529	212.205
gene-BSU_24190	yqiI	N-acetylmuramoyl-L-alanine amidase	2.36591	1.51965	-2.0188	2.13511	-1.4203	1.51945	3.78703	4.5113	3.25318	5.09866	3.48658
gene-BSU_24200	yqiH	putative lipoprotein	2.68697	2.38406	-1.44939	1.31463	-1.20307	4.81418	6.8564	31.0574	19.4413	20.359	9.34726
gene-BSU_24480	yqhR	putative integral inner membrane protein	23.0342	2.97407	1.14682	-3.02724	2.63857	1.31785	24.0868	96.4175	110.568	20.031	31.9456
gene-BSU_24490	yqhQ	conserved protein of unknown function	2.67919	1.8359	-1.9875	2.44264	-1.54549	95.3933	265.752	562.71	188.96	416.15	255.744
gene-BSU_24510	yqhO	putative lipase / acyl esterase	11.8019	2.14102	1.22003	-2.27357	2.14494	1.70548	26.4629	89.7831	89.9976	22.8751	31.7512
gene-BSU_24580	yqhH	putative RNA polymerase-associated helicase protein	57.652	1.90551	-2.93047	-1.35496	1.81515	0.892474	65.2761	174.979	46.0064	21.1945	23.4803
gene-BSU_24590	yqhG	conserved protein of unknown function	2.93257	1.89669	-2.60691	-1.33524	2.20123	24.1335	60.5368	146.7	37.6216	17.7859	25.7683
gene-BSU_24660	spoIIT	factor involved in sporulation	11.0067	1.37009	-1.4521	-1.71498	1.79339	4.36843	72.7921	88.1959	44.0726	16.6265	28.2212
gene-BSU_24760	rsbRD	component of the anxiosome (stressosome)	3.12658	1.37797	-1.67331	2.19544	-2.254	7.13979	21.6751	21.9421	8.53607	16.8934	11.0437
gene-BSU_24810	yqgV	conserved protein of unknown function	1.32868	2.21104	-1.64719	-1.67707	1.32968	98.352	125.053	284.269	122.48	43.7866	76.9308
gene-BSU_24820	yqgU	putative lipoprotein	1.53561	2.61406	-1.87649	-1.51433	1.33366	54.4943	75.2913	161.99	77.7151	26.9145	52.5373
gene-BSU_24830	yqgT	putative d,l-endopeptidase	2.66529	2.59935	-1.37543	-1.75035	1.46772	28.9915	72.5545	191.19	121.986	42.0313	57.8732
gene-BSU_25200	sigA	RNA polymerase major sigma-43 factor (sigma-A)	1.08668	2.16812	-1.56943	-1.17178	-1.13233	984.305	863.014	1746.9	756.634	458.687	593.003
gene-BSU_25230	yqxD	conserved protein of unknown function	2.06624	2.80103	-1.67958	-1.13089	1.31327	88.0039	144.566	412.943	189.43	99.102	157.467
gene-BSU_25350	yqfD	stage IV sporulation protein; putative UDP-glucose-4-epimerase	11.8204	1.87702	-4.2934	1.10899	1.0231	11.6929	155.983	354.101	53.9253	33.9886	32.7676
gene-BSU_25360	yqfC	conserved sporulation protein of unknown function	13.1482	2.28386	-2.37605	-1.54035	1.23407	9.48042	110.201	264.183	106.585	40.7588	42.819
gene-BSU_25520	yqxA	conserved protein of unknown function	14.8084	1.27484	-2.41975	1.24166	-1.05135	2.08757	147.418	280.978	64.8262	38.8955	44.4628
gene-BSU_25530	spoIIP	spore autolysin (stage II sporulation)	16.0237	1.60725	-1.94545	-1.24677	1.26204	4.10762	280.457	600.448	227.288	79.734	86.3829
gene-BSU_25540	gpr	spore germination protease	42.5619	2.24938	-1.35671	-3.2952	2.08587	2.41506	128.149	339.586	245.478	42.3157	47.844
gene-BSU_25600	comER	putative pyrroline-5'-carboxylate reductase	56.0761	3.32051	1.06	-2.55582	2.27832	1.43488	688.991	2741.94	3262.73	719.727	932.545
gene-BSU_25750	nucB	sporulation-specific matrix degrading exported DNase	19.8429	4.56282	-1.28016	-2.30604	2.46095	5.73954	94.2088	356.722	331.369	94.8731	121.368
gene-BSU_25770	spoIVCA	site-specific DNA recombinase; skin element	47.1054	2.83284	-1.4329	-2.45763	2.33471	4.34227	102.991	376.863	306.625	66.0559	93.7474
gene-BSU_25780	arsC	thioredoxin-coupled arsenate reductase; skin element	4.41402	2.29927	-2.99615	-1.34881	1.82936	11.4203	15.5983	70.4085	11.4972	5.78314	10.112
gene-BSU_25800	yqcK	putative thiol lyase	4.84397	2.6427	-4.0841	1.03593	1.44553	4.27928	9.14187	27.0576	5.92178	3.24564	4.90967
gene-BSU_26075	yqbK	putative phage tail sheath protein; skin element	4.92866	-1.1495	1.11121	1.60362	-1.59287	0.505129	2.09827	1.03686	1.09028	1.64083	0.594401
gene-BSU_26170	yqbB	putative phage head morphogenesis protein; skin element	1.41117	2.0047	-1.74412	1.30346	1.12859	2.14139	2.19584	3.39085	1.12718	0.89771	1.27
gene-BSU_26180	yqbA	putative phage capsid protein; skin element	1.02254	2.46945	-2.03384	-1.48348	2.31228	1.33361	0.931406	2.63968	1.02854	0.282933	1.14076
gene-BSU_26280	yqaK	putative DNA recombination protein; skin element	3.85026	1.42074	-2.05172	1.21837	1.23686	0.275901	1.17882	1.69899	0.46104	0.862398	0.389593
gene-BSU_26410	psiE	phosphate starvation inducible protein	2.17187	2.4355	-2.74887	1.79743	-1.13278	5.84552	9.4666	19.1595	6.85342	9.77725	11.383
gene-BSU_26420	yrkQ	two-component sensor histidine kinase [YrkP]	2.39795	2.92315	-2.82987	1.46006	-1.08115	5.81112	11.5091	23.324	6.52431	7.27901	9.80844
gene-BSU_26430	yrkP	two-component response regulator [YrkQ]	2.09186	2.15241	-2.57686	1.83179	1.65737	2.59846	2.65489	5.81413	2.12387	2.55505	5.86279
gene-BSU_26449	.	hypothetical protein	3.47798	2.13357	-4.31941	2.71051	-1.26271	18.3158	28.6716	59.1723	7.32179	10.7998	28.7618
gene-BSU_26569	.	hypothetical protein	5.35591	1.44161	-3.92133	2.99923	1.07381	2.66548	9.96502	16.414	2.50544	3.18563	4.70484
gene-BSU_26580	bltR	transcriptional regulator (polyamine metabolism)	2.06111	1.52127	-2.85086	1.76321	1.53688	4.01768	4.18933	8.20486	2.39775	1.47744	5.77458
gene-BSU_26740	cypA	cytochrome P450	33.2857	4.15185	-2.00459	-1.67212	1.55457	4.14522	245.978	782.449	434.632	133.357	209.911
gene-BSU_26920	yraJ	conserved protein of unknown function	1.67241	1.35188	1.03096	-2.10525	1.04264	235.234	548.411	486.247	410.614	116.756	251.693
gene-BSU_26930	yraI	conserved protein of unknown function	1.86957	1.34517	1.03143	-2.34731	1.04073	140.008	303.3	341.831	228.028	54.0965	143.419
gene-BSU_27120	sigV	RNA polymerase ECF(extracytoplasmic function)-type sigma factor (sigma(V))	2.11626	1.49897	-1.31534	-2.41543	2.19077	2.66814	4.02352	7.4558	5.40929	0.692592	2.16084
gene-BSU_27310	pbpI	penicillin-binding protein PBP4B	18.1718	2.20844	-6.74006	2.47142	-1.61878	6.27261	223.306	572.778	37.6221	69.4718	75.1141
gene-BSU_27430	glnQ	glutamine ABC transporter (ATP-binding protein)	50.2486	1.81185	-2.14759	-2.02181	2.24205	0.107862	151.967	514.672	197.433	42.1836	81.9048
gene-BSU_27440	glnH	glutamine ABC transporter (glutamine-binding lipoprotein)	49.5191	3.09652	-2.80964	-2.18414	2.3995	0.765272	205.277	1050.6	371.351	73.925	124.913
gene-BSU_27450	glnM	glutamine ABC transporter (permease)	44.8357	1.68272	-1.66562	-2.23685	2.32355	0.845502	67.6056	284.503	125.644	24.3851	36.457
gene-BSU_27460	glnP	glutamine ABC transporter (permease)	38.2033	1.497	-1.57253	-2.21785	2.4784	0.598415	62.2581	225.998	92.2476	18.0228	36.8846
gene-BSU_27690	yrzE	putative transporter	35.8644	1.82298	-8.20723	2.67946	-1.37168	1.7358	361.921	1056.84	57.4316	114.897	109.931
gene-BSU_27740	ruvA	Holliday junction DNA helicase	2.03738	2.3912	-2.24194	-1.02435	1.62509	8.95311	9.42472	27.5666	7.4805	4.93857	13.3296
gene-BSU_27750	bofC	bypass of forespore C, intercompartmental signaling factor	3.22292	2.24686	-2.29084	1.01061	1.32882	77.712	207.767	602.738	171.065	121.581	153.402
gene-BSU_27810	alaP	sodium/proton-dependent alanine transporter	13.4433	3.33109	-1.09162	-2.15255	1.80534	6.32296	82.3168	328.395	258.492	83.1997	99.1294
gene-BSU_27840	safA	morphogenetic protein associated with SpoVID	54.5111	2.9786	-1.09319	-2.77815	2.21097	6.14732	5515.83	18998	17402.1	3632.68	4705.07
gene-BSU_27850	nadA	quinolinate synthetase	72.966	2.98546	-1.03573	-2.18976	2.32312	2.98332	628.073	2114.75	1800.47	520.483	789.275
gene-BSU_28100	cotN	spore coat protein	45.2046	2.9527	-1.90401	-2.33431	1.92064	1.68606	1459.28	4890.67	2634.61	574.636	672.048
gene-BSU_28110	spoVID	morphogenetic spore protein (stage VI sporulation)	43.4258	2.88113	-1.74515	-2.34891	1.79332	2.50274	2075.23	6667.11	3846	889.585	936.657
gene-BSU_28210	lonB	spore-specific ATP-dependent protease LonB	51.8278	2.17532	-4.44713	-1.20134	1.30802	2.60684	560.851	1510.99	230.568	131.506	136.484
gene-BSU_28380	gerM	germination (cortex hydrolysis) and sporulation (stage II, multiple polar septa) lytic enzyme	27.9513	1.72334	-8.46761	2.61746	-1.72726	2.57106	1385.35	3523.31	137.349	329.064	272.366
gene-BSU_29500	gerW	germination-associated protein	56.9795	2.65319	-1.04848	-3.00218	2.24517	4.65582	831.436	2681.15	2344.93	467.312	588.773
gene-BSU_29510	ytfI	conserved sporulation-related protein	24.6876	2.59788	-5.25357	1.63522	1.04645	2.3093	92.2543	318.288	40.6635	44.3289	54.2942
gene-BSU_30020	ytzE	putative transcriptional regulator (DeoR family)	3.70233	2.76606	-2.10135	-1.23392	1.21628	92.4454	243.649	793.155	346.026	157.864	217.192
gene-BSU_30110	rmgS	lipoprotein required for rhamnogalaturonan transport and degradation	1.28804	2.76054	-1.84951	-1.43615	1.84046	4.21241	6.33265	16.0581	8.01675	3.09811	3.9655
gene-BSU_30180	ytbQ	putative NAD-dependent nucleoside-diphosphate-sugar epimerase	5.47071	2.53647	-1.44704	-1.27097	1.3987	8.77125	48.168	110.841	63.9523	36.4292	46.3371
gene-BSU_30200	bioB	biotin synthase	2.76427	3.20582	-1.88734	1.28035	1.34549	10.453	24.414	81.8344	27.6187	24.6988	39.9855
gene-BSU_30700	rpmEB	ribosomal protein L31	4.65339	1.32124	-2.30884	1.12403	1.75299	5.05264	12.4806	47.0878	14.0499	6.44507	15.7187
gene-BSU_30930	ytaB	putative receptor	4.40984	1.26213	1.18428	1.1806	-1.34276	6.88867	41.6365	35.03	48.5367	48.0075	25.4453
gene-BSU_30940	glgP	glycogen phosphorylase	5.40805	2.26153	-2.78093	-1.13964	-1.18197	42.5142	356.988	716.579	228.012	104.534	99.1872
gene-BSU_30950	glgA	glycogen (starch) synthase	5.97187	2.05614	-2.10068	-1.40726	-1.02206	58.2037	410.314	888.341	376.885	118.167	108.745
gene-BSU_30960	glgD	glucose-1-phosphate adenylyltransferase (ADP-glucose pyrophosphorylase) beta subunit	6.39791	2.17919	-1.79241	-1.70264	1.03178	70.7837	542.604	1208.52	619.789	175.638	153.963
gene-BSU_30970	glgC	glucose-1-phosphate adenylyltransferase (ADP-glucose pyrophosphorylase) subunit alpha	6.83037	2.31486	-1.79673	-1.72213	1.14449	32.8836	249.401	609.76	345.131	94.4504	93.1113
gene-BSU_30980	glgB	1,4-alpha-glucan branching enzyme	9.06676	2.26922	-1.67864	-1.65976	1.15573	16.4442	174.58	482.285	288.633	78.9657	86.3697
gene-BSU_31290	yugT	putative oligo-1,6-glucosidase	28.1151	2.88547	-1.90731	-2.07306	1.70378	2.36131	121.169	431.741	196.74	53.5852	58.2679
gene-BSU_31322	kbfO	potassium channel protein involved in biofilm formation	8.81995	2.40572	-1.35402	-1.74305	1.73784	2.39002	25.1037	70.2245	42.9834	15.7323	20.4181
gene-BSU_31730	cotIC	inner spore coat protein	102.964	2.12752	-1.44743	-1.86443	2.40108	0.639282	380.349	1128.99	619.727	212.871	203.111
gene-BSU_32070	spsC	stationary phase survival protein	11.2078	2.29063	-2.12901	-1.60589	1.82527	14.721	227.044	752.062	245.694	76.3163	138.793
gene-BSU_32250	thrC	threonine synthase	2.02783	1.59467	-1.4745	-1.35055	1.5998	177.014	259.825	514.292	272.936	117.342	219.237
gene-BSU_32260	hom	homoserine dehydrogenase	3.05941	2.75928	-1.60801	-1.41477	1.92874	78.5713	197.591	491.943	298.443	111.932	230.383
gene-BSU_32270	cotNH	spore coat-associated protein	12.4964	4.20288	-1.48249	-1.58109	2.00834	12.874	163.618	457.357	378.055	123.359	220.027
gene-BSU_32280	yutG	putative phosphatidylglycerophosphatase	35.3274	3.39854	-1.00245	2.17088	-2.00306	0.470848	110.982	553.593	296.724	749.038	261.628
gene-BSU_32350	fisB	protein required for membrane fission during spore formation	9.55282	1.52914	1.42313	2.13677	-3.35978	16.0347	130.762	296.36	203.665	473.31	126.383
gene-BSU_32470	pucE	xanthine dehydrogenase, iron-sulfur subunit	2.22606	1.58428	-1.26057	1.14873	-1.32776	5.42287	11.585	14.7093	7.9291	11.5497	9.09331
gene-BSU_32490	pucC	xanthine dehydrogenase, FAD-binding subunit	2.46556	1.31191	-1.1686	1.61138	-1.73914	1.88565	4.12905	5.34973	2.8359	4.94063	2.69597
gene-BSU_32500	pucB	putative molybdopterin cofactor synthesis cytidylyl transferase	3.1028	1.12099	1.16841	1.47817	-1.89871	1.39959	4.34904	7.38743	3.66762	6.17617	3.36875
gene-BSU_32669	yuzN	putative transcriptional regulator	1.00074	1.65046	-2.15931	1.75981	1.40028	5.35485	2.70938	6.69419	2.47252	1.08822	5.37262
gene-BSU_32950	cotNW	spore lipoprotein	2.86441	1.85756	-1.52081	-1.38258	1.73155	4.12906	10.1633	20.3729	9.67474	5.44645	7.7952
gene-BSU_33130	liaI	membrane anchor for the phage-shock protein A homolog LiaH	1.62142	-1.47368	-1.1678	1.01045	4.30644	43.9594	29.3197	34.859	14.7433	14.9132	15.3
gene-BSU_33180	yvrC	putative lipoprotein binding vitamin B12	2.46355	2.37799	-2.53352	1.0653	1.09494	52.3379	120.431	252.318	64.0819	53.3793	88.2104
gene-BSU_33450	helD	transcription factor	2.37921	2.91355	-1.20799	-1.53631	1.04912	44.8454	81.426	193.417	191.118	84.5458	63.8625
gene-BSU_33850	yvbG	putative integral membrane protein	6.64044	1.54792	-1.62064	-1.4462	1.66847	3.33814	19.6771	25.94	16.1921	6.20596	9.03461
gene-BSU_34380	slrR	transcriptional regulator of autolysin genes (biofilm formation)	3.55699	2.14958	-2.6844	1.10769	1.54279	1.5418	12.9921	23.0578	9.87621	5.29176	7.80142
gene-BSU_34860	hisIE	bifunctional phosphoribosyl-AMP cyclohydrolase; phosphoribosyl-ATP pyrophosphohydrolase	15.9882	-2.71189	-1.37636	-1.33265	2.70337	3.74437	8.93237	22.7284	11.0279	6.05853	14.5402
gene-BSU_34870	hisF	imidazole glycerol phosphate synthase subunit	21.6941	-2.9105	-1.53581	-1.07221	2.6595	2.58998	7.63554	13.8073	7.46571	3.65732	7.89966
gene-BSU_34880	hisA	phosphoribosylformimino-5-aminoimidazole carboxamide ribotide isomerase	26.3778	-2.6457	-1.23599	-1.39901	2.67112	0.639282	3.30045	6.46742	2.93773	1.52807	4.06222
gene-BSU_34890	hisH	imidazole glycerol phosphate synthase, glutamine amidotransferase subunit	18.7424	-3.48349	-1.53674	-1.04013	3.0706	1.84581	5.78341	11.6913	4.85797	3.25811	5.9948
gene-BSU_34900	hisB	imidazoleglycerol-phosphate dehydratase [Mn(II)-dependent]	19.0154	-3.87443	-1.75183	1.36453	2.94719	1.0753	5.31224	12.2383	3.20069	2.29843	7.11757
gene-BSU_34910	hisD	histidinol dehydrogenase	14.0987	-4.09773	-1.21017	-1.11418	3.0408	2.26587	6.27969	9.93961	4.64339	2.97264	6.03164
gene-BSU_34920	hisG	ATP phosphoribosyltransferase	18.1656	-3.71393	-1.47347	1.3762	2.13656	2.32711	4.44812	9.53557	4.45152	3.98604	4.02109
gene-BSU_34930	hisZ	histidyl-tRNA synthetase-like subunit of ATP phophoribosyltransferase	8.25039	-2.92958	-1.42321	-1.01982	2.95658	2.07277	7.49919	8.99958	3.68715	2.02853	5.59419
gene-BSU_35190	yvkC	putative phosphotransferase	5.00204	-1.02041	-1.27777	-1.47556	1.42228	6.20611	23.6561	38.4943	21.7349	8.42796	7.77372
gene-BSU_35200	yvkB	putative transcriptional regulator (TetR/AcrR family)	4.20739	-1.06713	-1.35097	-1.36322	1.16536	6.20776	23.8711	35.3148	19.623	6.16361	7.59707
gene-BSU_35210	yvkA	putative efflux transporter	3.22762	-1.14077	1.10489	-1.36797	1.18927	8.77612	25.5433	37.2292	24.9506	12.2161	11.9143
gene-BSU_35240	ctpB	PDZ-containing carboxyl-terminal protease processing protease [Zn(II)]	27.2165	2.15777	1.15608	-3.55371	2.41815	0.490426	104.479	340.617	322.345	44.5158	63.9427
gene-BSU_35540	tuaH	putative glycosyltransferase (teichuronic acid)	4.61699	1.79556	-2.96947	1.1144	1.20733	17.9786	60.707	116.534	27.4843	17.4366	25.6662
gene-BSU_35550	tuaG	putative glycosyltransferase (teichuronic acid)	4.01679	1.88102	-2.30489	-1.06222	1.26785	19.373	46.2559	98.0182	29.0189	14.8007	24.6864
gene-BSU_35560	tuaF	putative hydrolase involved in teichuronic acid synthesis	3.72934	1.95923	-2.71337	1.08273	1.21485	14.3177	33.7937	76.0296	19.2464	11.5281	16.2638
gene-BSU_35580	tuaD	UDP-glucose 6-dehydrogenase (teichuronic acid)	3.05545	2.1833	-3.2759	1.31647	1.17414	29.5011	54.8425	144.934	27.4454	25.0039	28.2392
gene-BSU_35590	tuaC	putative glycosyltransferase (teichuronic acid)	2.15218	2.42359	-2.65695	1.19688	1.17059	30.1757	40.9186	108.637	22.4048	21.5014	23.7015
gene-BSU_35890	capC	capsular polyglutamate amide ligase/translocase subunit	1.98551	1.78839	-3.22348	1.27906	2.32588	2.09685	2.61305	6.22559	0.875977	0.771085	2.77585
gene-BSU_36000	alsD	alpha-acetolactate decarboxylase	3.77087	2.01844	-1.1427	-1.87534	1.43931	2.66201	8.42096	12.8349	10.4578	3.84037	4.33727
gene-BSU_36210	ywqH	conserved protein of unknown function	2.47029	-1.53443	1.14959	-1.04222	1.2555	6.69206	15.0906	11.7742	7.45512	3.17868	9.44971
gene-BSU_36420	spoIIID	transcriptional regulator (stage III sporulation)	257.785	3.57788	1.02404	-2.25145	1.96744	0.278836	137.006	782.982	722.506	190.874	228.565
gene-BSU_36550	spoIIQ	forespore protein required for alternative engulfment	32.8194	1.83048	-7.38524	2.08752	-1.27938	5.81431	6480.9	17522.5	1082.75	1373.95	1439.14
gene-BSU_36560	ywnH	putative aminoacid analogs (phosphinothricin) N-acetyltransferase	2.00402	2.04129	-1.45065	-1.68298	1.64312	35.9596	54.7989	130.543	56.8851	18.8657	54.163
gene-BSU_36570	ywnG	putative integral inner membrane protein	2.78588	2.24407	-1.41245	-2.08216	1.66319	131.356	347.13	784.897	429.317	129.369	201.049
gene-BSU_36720	ywmE	conserved protein of unknown function	6.59024	1.39293	-1.23244	-1.88586	2.09953	6.79533	66.8816	89.669	96.7224	21.1513	27.2445
gene-BSU_36770	ywmB	conserved protein of unknown function	1.95147	1.77972	-2.14729	1.27577	1.1719	57.7269	88.7515	143.107	39.2328	28.9157	94.9634
gene-BSU_36950	tsaC	tRNA(NNU) t(6)A37 threonylcarbamoyladenosine modification; threonine-dependent ADP-forming ATPase	2.6026	1.79242	-1.97281	1.23126	-1.07163	10.6504	44.537	115.92	17.3712	16.6244	35.1981
gene-BSU_37160	rpoE	RNA polymerase (delta subunit) and transcriptional repressor	1.85855	2.79491	-2.02991	-2.33296	1.42774	124.124	111.505	346.065	63.9992	27.8355	68.4391
gene-BSU_37170	acdA	acyl-CoA dehydrogenase	1.78428	3.30674	-1.18114	-3.01652	1.26019	215.409	177.56	447.897	209.975	73.697	101.392
gene-BSU_37260	narJ	nitrate reductase molybdenum cofactor assembly chaperone NarJ	5.66138	2.17894	-1.5104	1.20692	-1.31012	0.566715	2.42136	5.7956	2.66344	1.95376	0.900276
gene-BSU_37270	narH	nitrate reductase (beta subunit)	5.08404	1.91727	-1.50166	-1.30258	1.55268	0.805652	2.52432	5.38644	1.88479	1.18507	2.04776
gene-BSU_37280	narG	nitrate reductase (alpha subunit)	6.80557	2.5467	-1.49484	-1.41108	1.80445	0.725109	3.87265	10.1312	4.95811	2.29396	3.11691
gene-BSU_37460	rapF	response regulator aspartate phosphatase anti-activator of ComA	2.47502	2.26826	-1.17858	-1.60613	1.35841	473.025	1503.99	2063.52	1915.74	413.601	994.802
gene-BSU_37510	pbpG	sporulation specific penicillin-binding protein 2D	23.6498	2.55363	-2.95756	-1.47276	1.45264	0.606024	77.0321	210.769	57.8183	25.5102	29.8444
gene-BSU_37920	gerQ	inner spore coat protein	70.025	4.32501	1.37551	-2.55229	2.22648	1.29613	1703.35	7244	10986	2568.97	3004.78
gene-BSU_38230	vbfB	subunit of acetate transporter as a volatile signal for biofilm formation	26.6554	2.65827	-3.22404	-1.30472	2.10505	12.978	370.212	1753.17	396.741	134.051	310.195
gene-BSU_38240	vbfA	acetate Na+-dependent symporter subunit involved in volatile signal for biofilm formation	29.023	3.05237	-2.97387	-1.59963	1.91951	19.0205	859.245	3092.74	632.665	316.216	446.297
gene-BSU_38470	eapD	exported double-zinc aminopeptidase	3.29367	1.19555	-1.47301	1.65313	-1.81425	81.5056	300.415	402.373	126.246	157.293	161.072
gene-BSU_38630	katX	major catalase in spores	32.7756	3.09854	-3.16059	-1.43743	1.55335	5.21341	458.425	1519.41	418.886	201.196	228.4
gene-BSU_38720	nnrA	NAD(P)H dehydratase	2.89665	1.86093	-1.70583	-1.79627	1.12819	10.787	32.9495	63.9291	27.6905	9.44719	6.91458
gene-BSU_38730	cydD	ABC membrane transporter (ATP-binding protein) required for cytochrome bb' function (reductant efflux pump)	16.0638	2.39457	-2.27441	-1.50215	1.59719	5.96108	98.9129	245.649	75.6214	35.2661	45.5895
gene-BSU_38740	cydC	ABC membrane transporter (ATP-binding protein) required for cytochrome bb' function (reductant efflux pump)	8.95628	2.4412	-2.3225	-1.3905	1.46729	16.7046	105.482	290.15	83.0192	46.2499	51.0698
gene-BSU_38750	cydB	cytochrome bb' ubiquinol oxidase (subunit II)	4.52962	2.63719	-1.70909	-2.07849	1.72658	57.6787	139.654	381.167	170.399	58.3432	73.859
gene-BSU_38830	aldY	putative aldehyde dehydrogenase	5.6241	2.99526	-1.30013	-1.17526	1.08225	5.98636	34.3913	71.3082	55.7624	42.3026	29.3007
gene-BSU_38970	yxjF	putative hydroxyacid dehydrogenase	56.2238	2.96499	-3.443	-1.51679	1.57101	4.87638	746.152	2668.4	384.449	261.25	277.262
gene-BSU_38980	scoB	acetoacetyl CoA-transferase (subunit B)	54.8667	2.9379	-3.28609	-1.7679	1.78086	3.26122	496.075	1985.3	256.132	155.572	194.821
gene-BSU_38990	scoA	acetoacetyl CoA-transferase (subunit A)	93.7032	2.609	-3.58297	-1.38656	1.67505	1.64501	249.513	987.238	129.129	79.8509	109.408
gene-BSU_39000	yxjC	putative acid metabolite permease	70.8601	2.09373	-4.43535	-1.05125	1.42663	0.775788	425.282	1304.35	135.251	115.113	134.45
gene-BSU_39060	citH	secondary transporter of divalent metal ions/citrate complexes	51.3561	1.71207	-3.4836	-1.49701	1.70875	0.920746	533.581	1385.73	169.592	96.16	123.386
gene-BSU_39070	bglS	endo-beta-1,3-1,4 glucanase	2.70024	1.59151	-1.17478	1.27517	-1.22123	59.9715	210.841	307.864	172.627	127.979	168.036
gene-BSU_40060	gntK	D-gluconate kinase	3.27059	2.08346	-1.41321	1.16022	1.08303	2.49867	9.20523	18.5045	6.61456	5.25996	12.2591
gene-BSU_40290	yycN	putative N-acetyltransferase	13.9506	3.47166	-1.12688	-1.49303	2.24084	21.5361	209.353	748.789	759.715	301.036	390.387
gene-BSU_40630	ictI	inner spore coat protein	11.2785	2.83598	-1.09826	-1.80718	1.37314	13.8527	112.414	382.162	323.995	110.825	101.218
gene-BSU_40640	yybH	conserved hypothetical protein	2.84857	1.41202	-1.06957	-1.07448	1.26338	2.82268	3.66114	11.4402	9.34937	2.00186	6.40581
gene-BSU_40950	sprC	spore-specific protease	24.7415	1.71511	-2.97345	-1.16333	1.05619	1.65406	298.861	628.604	171.82	84.8521	103.758
gene-BSU_40573	yyzI	hypothetical protein	2.28978	1.97734	-3.14624	2.70068	-1.13041	1.96579	5.24943	13.8347	3.07961	4.87953	4.85774
gene-BSU_40578	yyzK	hypothetical protein	2.34661	1.7265	-1.51642	-1.20323	1.9276	7.48873	15.4269	29.6457	14.7486	4.42587	16.995

## Sheet: cluster 8
Table S8. List of the differentially expressed genes in cluster 8
Gene_ID	Gene_Symbol	Description	fold change					Transcripts per millions mapped reads (TPM)
			10H/8H	12H/10H	15H/12H	18H/15H	24H/18H	8H	10H	12H	15H	18H	24H
gene-BSU_00430	prtG	sporulation-specific protease	11.185	12.9786	17.1811	3.83396	-3.49129	0.180141	3.17491	10.1026	598.622	2913.38	550.401
gene-BSU_00770	folP	dihydropteroate synthase	-1.62809	1.14129	2.04068	1.30901	-1.31118	85.9633	68.9156	45.3496	54.2126	71.8343	77.0639
gene-BSU_00930	cysE	serine O-acetyltransferase	-1.08772	1.18793	2.19829	1.77321	-2.05805	29.6973	28.8959	23.4808	44.5271	68.6416	28.2679
gene-BSU_01780	glmS	L-glutamine-D-fructose-6-phosphate amidotransferase	-1.63031	1.47644	-1.5023	2.05966	-1.34039	438.645	453.402	508.959	239.427	467.463	490.508
gene-BSU_02150	ybeF	conserved protein of unknown function	4.13485	2.93871	1.61494	1.17731	1.39376	1.26316	4.38507	13.3346	28.2977	24.2125	29.7652
gene-BSU_02730	natK	two-component sensor histidine kinase [NatR]	-1.19965	2.21933	2.95969	1.71637	-1.55257	15.8578	15.2711	25.4792	41.0872	81.6257	75.0089
gene-BSU_02970	yceK	putative transcriptional regulator (ArsR family)	1.79246	-1.23073	2.04732	1.00446	2.1778	8.04482	16.9091	22.2587	27.1575	10.4497	26.6592
gene-BSU_02980	opuAA	L-proline betaine and betonicine ABC transporter (ATP-binding protein)	2.25221	2.56691	1.77209	1.42746	1.43809	14.3877	47.5748	81.4726	114.384	54.8639	266.853
gene-BSU_02990	opuAB	L-proline betaine and betonicine ABC transporter (permease)	1.55533	2.10324	2.13745	1.0362	1.30923	44.5487	117.132	149.468	267.61	96.6071	342.421
gene-BSU_03000	opuAC	L-proline betaine and betonicine ABC transporter ABC transporter (glycine betaine-binding lipoprotein)	1.42846	2.17961	2.23648	-1.04638	1.29589	44.3083	122.463	170.463	299.776	92.304	324.51
gene-BSU_03540	ycxB	hypothetical protein	-1.22305	2.65394	1.60068	1.64272	-1.00188	3.66384	2.55886	4.27684	8.03567	8.78353	14.4762
gene-BSU_03550	ycxC	putative permease	-1.17025	3.55639	2.5968	-1.09784	1.07565	3.51707	3.2201	5.30402	18.8909	15.2893	13.3028
gene-BSU_03580	yczE	integral inner membrane protein regulating antibiotic production	-1.00385	1.71526	2.79474	-1.28251	1.23235	13.1053	16.4612	16.6528	35.8907	16.8006	34.4411
gene-BSU_03680	yclG	putative uronase	1.29117	2.96324	6.72861	4.97906	-1.74022	2.77787	3.39792	7.50855	22.6856	173.297	156.919
gene-BSU_03740	yclI	putative transporter	2.0317	3.02843	-1.1633	1.95413	-1.15518	0.322923	0.86233	1.77549	1.18041	1.51407	1.76697
gene-BSU_03788	yczM	putative type I toxin	1.08819	-1.40463	11.431	5.60746	2.64446	313.653	481.548	239.801	486.167	7141.7	49156.6
gene-BSU_03789	yczN	putative spore and germination protein	1.13916	-1.25663	7.59415	7.45675	2.70431	589.738	673.401	851.013	685.077	11544.6	97628.2
gene-BSU_03880	yczG	putative transcriptional regulator (ArsR family)	-1.26763	1.08343	2.63627	-1.17251	1.79951	121.317	115.454	98.8189	164.089	74.0793	271.24
gene-BSU_04110	lipC	spore coat phospholipase B	-3.01478	-1.71786	16.6454	2.90488	-3.23376	250.715	133.182	26.344	211.37	1123.79	400.164
gene-BSU_04320	kimA	cyclic di-AMP controlled transporter of potassium	-1.94454	2.37526	2.36143	-1.81496	1.30862	100.273	60.0001	68.2062	173.268	54.2169	124.868
gene-BSU_04360	mntH	proton-coupled manganese transporter	-1.40078	1.60723	4.60364	4.21764	-1.23517	43.5612	38.1179	29.7965	154.029	771.051	381.452
gene-BSU_04470	dctP	C4-dicarboxylate transport protein	-1.60846	1.77692	1.30254	2.18449	-2.72088	50.123	34.6313	17.0474	11.2092	32.513	72.2906
gene-BSU_04560	ddlA	D-alanyl-D-alanine ligase A	1.03788	1.28892	2.09116	1.18766	-1.08883	6.64493	5.91485	5.06621	8.05035	9.93723	9.07039
gene-BSU_04785	cmpA	factor allowing degradation of SpoIVA by ClpXP	8.2057	7.28261	4.26474	2.02598	-1.88221	9.65652	19.1558	137.436	1144.97	1761.58	737.062
gene-BSU_04850	helP	ICEBs1 mobile element: helicase processivity factor	1.51854	1.08253	1.02629	2.36075	-1.16768	1.23829	2.86583	2.45102	1.16395	2.61835	1.53
gene-BSU_04990	yddJ	ICEBs1 mobile element: putative lipoprotein of unknown function	1.01203	1.69716	-1.55066	2.80511	1.18593	0.412765	0.661346	5.44671	1.16395	2.50451	7.86856
gene-BSU_05040	yddN	putative alkanal monooxygenase	1.20554	1.33986	1.07618	2.66145	-1.52893	2.15852	1.81157	1.83106	1.35261	3.91213	3.91885
gene-BSU_05070	yddQ	putative hydrolase	-1.47038	2.63321	1.09772	1.342	-1.38426	3.47543	2.16551	5.5415	2.90379	2.47621	3.2206
gene-BSU_05120	cspC	cold-shock protein	1.10753	1.06863	-1.09069	2.08122	1.56597	253.89	241.526	364.966	165.226	156.663	768.953
gene-BSU_05190	ydeG	putative permease	-2.09101	1.30096	2.4965	1.70647	-2.34204	5.77727	2.92312	3.0494	3.73459	8.08432	3.54227
gene-BSU_05240	ydeL	putative PLP-dependent transcriptional regulator	-1.02155	1.33902	1.92703	2.69881	-1.43986	6.21371	4.8874	5.21781	8.56626	19.568	12.8622
gene-BSU_05390	ydfF	putative transcriptional regulator	-1.16194	-1.02319	2.70009	1.36113	1.13083	22.4002	17.6369	10.8178	22.5024	24.7121	51.7262
gene-BSU_05410	ydfH	two-component sensor histidine kinase [YdfI]	-1.70841	1.7231	1.05849	-1.04976	2.06874	3.72601	1.98998	3.8147	2.45563	0.992206	3.40178
gene-BSU_05500	ydfP	putative membrane bound oxidoreductase	1.68786	4.07902	4.05745	-1.12874	-1.66958	6.85507	7.10692	21.018	76.9428	68.2855	39.0755
gene-BSU_05529	ydzR	conserved hypothetical protein, sporulation-related	-2.35201	6.44907	3.59175	3.02104	1.91154	125.606	39.6321	127.117	505.962	748.616	5212.47
gene-BSU_05550	cotP	spore coat protein	5.63262	16.2167	4.54958	2.5509	-1.74935	0.728071	2.13866	8.88684	194.814	440.061	152.672
gene-BSU_06250	walM	protein involved in cell wall metabolism	-1.8452	3.83838	1.00177	2.21847	-1.38469	12.0484	12.418	21.4772	3.84123	17.7225	92.9015
gene-BSU_06260	ydjN	putative membrane protein	-1.45545	2.79852	-1.08877	1.88795	-1.47585	8.0359	11.0704	16.8474	6.7769	10.3152	31.0196
gene-BSU_06300	cotA	outer spore coat copper-dependent promiscuous laccase	-1.21744	6.66352	26.0335	3.19928	-4.01604	18.6636	10.7848	9.82422	1041.11	4328.75	632.452
gene-BSU_06380	yebC	putative integral inner membrane protein	-1.20845	2.0583	3.67639	2.20035	-2.11031	34.1324	32.9069	34.3285	130.906	357.94	145.318
gene-BSU_06740	yefB	putative site-specific recombinase / invertase; HGT island	2.02057	1.04818	-1.18598	5.00223	-1.71078	1.56741	2.60437	3.56208	1.36417	6.58048	5.90214
gene-BSU_06850	cotK	spore inner coat protein	-1.03544	10.387	17.9898	1.64835	-2.37653	19.9272	21.6689	22.7419	1949.57	4771.09	1092.85
gene-BSU_07200	calJ	pH-sensitive calcium-leak permease (di-aspartyl pH sensor)	-2.52583	1.14777	4.90808	1.32595	-2.04271	152.875	110.425	67.5646	139.418	297.361	278.489
gene-BSU_07210	yetK	putative efflux transporter	-1.65022	1.33569	3.01181	-1.25813	-1.54692	37.5342	54.7252	35.736	45.2048	44.5092	71.1155
gene-BSU_07230	flvM	putative flavin-dependent hydroxylase/monooxygenase acting on salicylate derivatives	1.00774	2.8207	2.36836	1.98816	-1.60267	1.55847	2.64836	4.113	7.85716	19.4204	14.8546
gene-BSU_07270	spmH	glucose-1-phosphate cytidylyltransferase (sporulation)	-4.536	-1.23218	223.841	3.63052	-3.25979	44.5066	5.05043	4.20465	220.604	1893.13	1091.73
gene-BSU_07280	spmG	putative CDP-sugar-dehydratase/epimerase	-4.15945	-1.13396	152.181	4.19342	-3.3553	56.8842	10.8347	5.99644	283.591	2471.98	1407
gene-BSU_07290	yfnF	putative glycosyltransferase	-4.09123	-1.07507	146.016	3.85172	-3.32643	57.7667	9.11743	8.19157	276.84	2351.35	1286.84
gene-BSU_07300	yfnE	putative glycosyltransferase (complex carbohydrate synthase)	-1.82786	3.49172	27.0851	3.20181	-3.0318	42.8173	13.7491	23.5858	443.881	2554.37	1391.74
gene-BSU_07310	yfnD	putative glycosyltransferase (complex carbohydrate synthase)	-1.77969	2.8647	28.7827	3.05514	-2.99893	47.3806	13.7293	28.1571	413.667	2465.57	1393.35
gene-BSU_07340	mtrA	methylthioribose permease	-1.32267	2.77623	2.78755	2.21063	-1.39352	6.52427	3.51477	7.33656	14.3626	46.9724	23.6729
gene-BSU_07440	yfmK	putative acetyltransferase	-1.17914	-1.18104	2.20108	-1.0078	-1.02937	28.3215	21.7963	19.2664	22.7078	18.0481	23.1011
gene-BSU_07680	yflH	putative enzyme	-1.86858	1.68584	1.98252	2.34659	-2.29952	47.179	25.5972	27.9987	45.0502	134.389	49.9653
gene-BSU_07690	mapB	methionine aminopeptidase B	-1.52139	1.41549	2.64086	3.00848	-2.59434	62.3811	56.5539	50.3581	95.7224	385.562	128.022
gene-BSU_07735	yflB	conserved hypothetical protein	1.50602	1.26607	2.05935	1.08562	-1.50363	9.60387	11.7545	13.201	14.4185	17.217	11.8662
gene-BSU_08060	acoA	acetoin dehydrogenase E1 component (TPP-dependent alpha subunit)	1.84962	1.72282	2.62969	1.93738	-1.17275	54.6969	41.5763	121.053	120.185	182.238	197.302
gene-BSU_08070	acoB	acetoin dehydrogenase E1 component (TPP-dependent beta subunit)	1.85799	1.83723	2.59959	2.06872	-1.21541	66.8637	47.2602	140.464	169.369	252.823	270.544
gene-BSU_08080	acoC	acetoin dehydrogenase E2 component (dihydrolipoamide acetyltransferase)	1.58422	1.81258	2.47872	2.10063	-1.26888	78.1062	59.9233	164.612	183.058	273.25	267.358
gene-BSU_08090	acoL	acetoin dehydrogenase E3 component (dihydrolipoamide dehydrogenase)	1.46682	1.73589	2.74621	1.84835	-1.18448	87.5969	63.0694	176.625	189.974	293.189	289.62
gene-BSU_08290	linJ	two-component sensor histidine kinase [LinK] (linearmycin resistance, biofilm formation)	-1.50068	1.292	2.23084	-1.39922	1.55496	23.596	19.0603	19.6652	23.7153	10.4197	46.6565
gene-BSU_08300	linK	two-component response regulator [LinJ] (linearmycin resistance, biofilm formation)	-1.39595	1.28978	2.0727	-1.53645	1.43978	34.6311	35.8513	30.6741	34.8558	14.6541	53.1306
gene-BSU_08800	ygaK	putative FAD-dependent oxido-reductase	-1.26358	3.60652	20.9981	3.57222	-2.64233	2.26153	1.92015	4.05551	31.7953	238.523	165.569
gene-BSU_08820	katA	vegetative catalase 1	-1.59117	3.09718	2.28448	1.51601	2.03478	194.684	67.4472	98.0431	265.033	388.092	330.923
gene-BSU_08880	rpsNB	alternative ribosomal protein S14	-1.16053	-1.20475	2.87838	-1.24516	-1.09652	1.45614	1.86646	1.53718	1.45996	1.28514	0.308428
gene-BSU_08890	ygaO	putative integral inner membrane protein	-1.20658	1.87203	2.24358	-1.34453	1.10398	31.6849	30.1233	41.5915	84.5137	50.6025	40.5837
gene-BSU_08899	ygzD	putative HTH-type transcriptional regulator	1.27444	-1.30371	1.69123	2.78514	-1.26208	7.43285	8.77517	8.25949	5.39314	15.7526	9.11474
gene-BSU_09120	dgcK	diguanylate cyclase	-1.90429	2.25008	2.26078	-1.87758	1.97458	24.0263	15.7094	14.315	36.3622	9.35744	43.0257
gene-BSU_09165	yhcO	putative exported protein (sporulation germination island)	1.45941	2.56773	9.83447	7.89929	-3.49631	4.70654	5.28735	13.9203	87.1061	705.525	309.383
gene-BSU_09420	lytE	cell wall dl-endopeptidase; phosphatase-associated protein (major autolysin)	-3.03078	2.78121	1.8216	1.04656	1.33219	53.2035	36.02	30.7666	21.3764	28.3978	293.08
gene-BSU_09490	yhdJ	putative acetyltransferase	1.51539	-1.58458	2.15012	-1.50651	1.10081	22.1782	27.4096	18.1398	30.4371	8.99824	16.6939
gene-BSU_09640	mscY	small conductance mechano-sensitive channel	-1.03078	2.54614	2.17462	2.2266	-1.70276	11.4847	12.7943	15.8987	32.7167	91.6441	67.7547
gene-BSU_09700	bmrB	regulator leader peptide	2.05243	-1.18342	1.31076	1.13228	1.34666	14.076	16.5908	26.9007	28.2868	16.5998	22.6181
gene-BSU_09958	sscA	spore assembly and germination protein	-1.95143	6.23004	63.9646	2.00367	-4.57929	97.6117	30.8932	39.3572	5307.97	14309.8	3304.22
gene-BSU_09959	sscB	spore and germination protein	-2.4033	7.95119	66.1003	1.82091	-4.85233	47.9021	16.412	26.2381	3582.82	9859.26	1762.19
gene-BSU_10080	yhfA	putative transporter	-1.22898	5.76659	4.0727	1.54745	-1.22949	12.0885	10.6799	14.4608	199.679	286.789	125.332
gene-BSU_10230	yhfH	conserved protein of unknown function	1.16469	-1.67471	2.45492	1.12146	1.29988	36.2486	16.0834	31.6431	30.7524	19.3797	30.7116
gene-BSU_10670	gerPF	spore germination protein	1.8554	4.8406	6.45121	2.09377	-1.76961	24.0563	48.707	66.3305	1488.56	2694.11	916.031
gene-BSU_10680	gerPE	spore germination protein	1.673	5.00961	4.11831	1.54885	-1.16605	31.2962	45.7562	54.7191	1145.31	1530.81	672.005
gene-BSU_10690	gerPD	spore germination protein	3.84374	4.67984	4.30366	1.26252	-1.23061	3.55397	9.01597	8.207	161.462	239.902	66.3382
gene-BSU_10700	gerPC	spore germination protein	2.18511	5.7657	4.4085	1.73012	-1.28859	24.4293	51.2372	43.3172	1161.04	1517.93	673.346
gene-BSU_10710	gerPB	spore germination protein	2.14894	10.702	4.63574	1.71947	-1.09737	2.68826	10.0502	15.9631	414.615	612.79	252.318
gene-BSU_10720	gerPA	spore germination protein	2.00049	12.6095	5.3772	1.86197	-1.1416	9.91751	17.4035	22.902	959.949	1537.81	679.709
gene-BSU_10730	pchI	Spo0A-P phosphatase (iron-metabolism related)	1.64763	-1.4703	2.17276	2.17226	-1.37846	54.2605	55.0116	35.8002	75.7835	113.887	97.3983
gene-BSU_10820	yisQ	putative Na(+)-driven efflux transporter	-1.04828	2.7401	2.61109	1.97878	-2.27773	1.20707	0.859556	1.36526	3.31373	7.89475	2.37408
gene-BSU_10880	yisV	putative PLP-dependent transcriptional regulator	-1.05605	1.30012	1.32707	2.20159	-1.87576	7.99827	11.3142	11.3387	8.50014	22.4469	12.5343
gene-BSU_10910	yisZ	putative adenylylsulfate kinase	4.41734	16.2108	10.2396	2.14984	-2.09133	1.96579	6.85926	29.9174	1265.68	3046.12	767.94
gene-BSU_10920	yitA	putative sulfate adenylyltransferase	7.80202	19.8257	9.29325	2.54694	-2.28643	1.0753	9.33232	32.9016	1523.9	4270.11	1121.59
gene-BSU_10930	yitB	putative phospho-adenylylsulfate reductase	5.50052	8.81771	7.0892	4.04411	-2.15581	1.5483	5.55214	22.6199	355.034	1468.05	448.938
gene-BSU_10940	slpH	2-phospho,3-sulfolactate phosphatase (sporulation related)	2.8902	4.55484	5.27939	2.95134	-2.24103	2.74696	7.21319	11.6296	173.498	479.319	150.187
gene-BSU_10950	slpS	2-phospho-3-sulfolactate synthase	2.35889	15.1923	5.50915	1.94972	-1.92932	3.31517	4.64772	13.944	370.689	825.869	258.824
gene-BSU_11080	yitQ	conserved protein of unknown function	1.5334	-1.17292	2.7854	2.28915	-2.04429	48.4093	75.2776	71.9967	95.1954	273.74	120.806
gene-BSU_11090	yitR	conserved protein of unknown function	1.14474	1.08007	1.96728	2.58412	-1.64116	30.4898	30.2824	30.7045	51.1173	115.663	73.3618
gene-BSU_11110	fakBB	fatty acid kinase fatty acid binding subunit B	-1.3827	1.28649	4.41159	1.40532	-1.75535	150.895	116.621	109.971	336.414	560.598	299.186
gene-BSU_11280	yjaU	conserved hypothetical protein	-1.44616	-1.16248	20.6974	4.82565	1.34094	31.5597	28.5683	18.7756	100.626	894.616	2357.78
gene-BSU_11320	yjzB	spore coat protein	2.63984	3.17199	11.0055	1.84891	-4.35557	0.327632	0.349962	7.34966	36.75	122.711	26.0236
gene-BSU_11350	yjaZ	conserved hypothetical protein	2.42507	1.3416	1.83842	1.42252	1.00355	8.50343	14.7465	21.2536	34.1029	30.7919	29.0299
gene-BSU_11690	thiG	hydroxyethylthiazole phosphate synthetase (thiamine biosynthesis)	-1.49036	1.37388	2.15081	-1.39494	1.32515	3.67152	3.37707	4.84482	5.68788	2.41902	6.04855
gene-BSU_11740	cotZ	spore coat protein (insoluble fraction, crust layer)	12.442	5.29195	39.9941	2.40234	-5.25123	9.49913	135.475	363.972	19373.3	55345.2	8360.9
gene-BSU_11750	cotY	outer spore coat protein (crust layer, insoluble fraction)	8.08775	8.21087	57.3146	2.16658	-4.72058	7.71845	77.9793	235.529	21147.1	65667.1	10293.1
gene-BSU_11760	cotX	spore coat protein (insoluble fraction)	-3.36194	6.30581	112.232	3.22489	-5.23622	289.528	61.8199	71.9722	21516.4	75557.9	18170.1
gene-BSU_11770	cotW	spore coat protein (outemost layer)	-3.07748	10.7168	63.5199	3.662	-4.58193	50.6902	9.5084	11.4201	3618.98	14277.4	3529.52
gene-BSU_11780	cotV	spore coat protein (insoluble fraction)	-4.19748	7.7099	59.9186	3.85816	-3.32627	253.775	44.2743	35.391	9403.89	38992	17226.2
gene-BSU_11800	yjcB	sporulation-specific protein	2.71447	12.0594	14.5852	1.70895	-2.53798	2.91228	4.27731	33.6259	754.846	1462.45	564.038
gene-BSU_11809	yjcZ	putative type I toxin	-2.52889	1.63921	95.2125	2.78684	-2.62513	270.493	101.349	85.0831	4345.28	22007.7	17361.8
gene-BSU_11810	spoVIF	sporulation-specific protein needed for heat resistance	-3.07652	4.85778	38.5182	2.92492	-2.30518	180.082	49.4064	69.5802	3887.79	15021.2	13958.3
gene-BSU_12070	yjdJ	conserved hypothetical protein	1.7519	1.59622	-1.1995	2.29774	-1.55672	31.9292	30.0331	66.029	36.8806	75.5751	45.1707
gene-BSU_12090	cotT	spore coat protein (inner coat)	2.50759	55.4161	15.3105	1.51385	-2.49856	12.9474	19.2268	232.939	14134.8	25409.9	6557.37
gene-BSU_12150	yjgB	putative exported protein	4.32286	3.57397	1.24136	1.88373	-1.87697	0.546053	3.79126	2.70208	13.6871	21.9127	7.51793
gene-BSU_12229	yjzI	putative phage protein	1.36817	3.08415	2.10805	1.92234	1.16627	0.416041	0.888793	1.64698	3.6499	8.03214	8.81223
gene-BSU_12400	yjnA	putative permease	-1.64231	19.0596	6.63291	1.74948	-1.5962	8.83964	4.61127	8.13803	541.624	925.699	373.488
gene-BSU_12490	xpdC	phage PBSX; manganese-containing peroxidase	-2.02013	8.06234	10.486	1.77084	-2.00191	21.1375	16.758	12.8925	517.462	1290.22	406.13
gene-BSU_12560	xpf	phage PBSX; putative RNA polymerase PBSX sigma factor-like	-1.98441	1.28731	2.89053	2.46664	-1.9905	1.07926	0.658752	0.406901	1.15938	2.04111	1.30628
gene-BSU_12590	xkdE	phage PBSX; phage capsid portal protein	1.01774	2.60492	2.43187	-1.39876	1.41203	3.48769	3.27384	6.20607	12.4509	6.17957	9.17822
gene-BSU_12680	xkdO	phage PBSX; putative tape measure protein	-1.01151	-1.04327	1.1871	2.11831	-1.23982	10.0674	10.3545	6.01958	4.54664	9.02396	12.6611
gene-BSU_12810	xlyA	phage PBSX; N-acetylmuramoyl-L-alanine amidase	-1.19348	2.03091	2.16546	-1.38959	1.54746	15.3042	12.4953	14.2757	25.2982	11.0617	31.4845
gene-BSU_12815	spoIISC	three component toxin / antitoxin / antitoxin SpoIISABC, antitoxin C	2.47747	2.12145	2.16609	2.09582	-1.11696	6.83754	9.73808	30.8272	60.6995	97.4334	127.327
gene-BSU_13190	ispA	intracellular serine protease	8.79804	-1.16426	-1.29619	2.15472	10.5508	22.1152	95.2772	242.971	141.251	115.075	1977.1
gene-BSU_13360	ykoP	conserved hypothetical protein	5.99484	3.81821	1.97444	1.79184	-1.5833	1.85183	12.0204	29.1355	71.4112	93.976	37.7154
gene-BSU_13440	ykoY	putative manganese-related ion transporter	1.03528	1.23804	3.42677	1.34128	-1.11779	15.7263	18.6934	17.5594	38.762	55.3847	25.7087
gene-BSU_13550	mtnA	methylthioribose-1-phosphate isomerase (methionine salvage pathway)	1.25388	-1.21161	2.09215	1.02211	1.22472	20.6575	21.9863	18.6611	32.246	23.2796	26.1118
gene-BSU_13560	mtnK	methylthioribose kinase (methionine salvage pathway, promiscuous)	1.29729	1.01437	2.01039	1.01256	1.21565	14.0273	14.913	16.4243	22.9036	20.0158	20.784
gene-BSU_13770	ykvO	putative oxidoreductase (HGT island)	2.36069	1.87205	-1.05033	2.26537	-1.58166	2.94737	6.07163	10.8344	5.47485	13.1224	9.14136
gene-BSU_13780	ykvP	spore protein (HGT island)	1.2976	1.61007	12.9945	5.35569	-2.33831	4.58685	4.75948	4.23686	31.2477	299.241	200
gene-BSU_13789	ykzQ	putative peptidoglycan binding protein	-1.6469	3.10018	10.9236	5.6075	-2.49159	4.48339	1.47352	3.18561	22.9079	182.055	130.757
gene-BSU_13820	ykvT	cell wall hydrolase related to spore cortex-lytic enzymes	1.65439	1.93061	1.08545	2.15875	-1.2129	0.250819	0.535827	1.48938	0.550105	0.830116	1.72661
gene-BSU_14009	ykzT	hypothetical protein	1.27145	2.40013	2.17736	1.8405	1.23898	6.30995	8.2954	22.4173	37.4115	38.2865	68.8823
gene-BSU_14040	ltdD	murein L,D-transpeptidase	-1.2428	3.04076	3.4319	1.56774	-1.08699	19.0622	13.744	19.9135	114.574	152.465	100.772
gene-BSU_14560	defB	N-formyl-cysteine deformylase (promiscuous)	-1.06102	2.45312	3.72044	4.10746	-2.53389	14.7346	13.3175	31.7823	63.9226	415.136	125.739
gene-BSU_14570	ykyA	putative lipoprotein	-2.51668	1.61959	2.23077	2.17438	-1.44244	9.36091	2.49973	4.01452	4.69273	12.7797	14.1271
gene-BSU_14620	slp	small peptidoglycan-associated lipoprotein	-1.37542	1.57801	1.39539	2.26453	1.67954	3.984	1.34385	2.76693	1.57676	3.00723	20.2082
gene-BSU_14629	rgpA	regulator of GapA synthesis	1.58802	3.15927	1.56734	1.0644	1.96924	24.2448	21.6976	112.407	156.444	78.0724	213.741
gene-BSU_14660	ykzI	conserved general stress protein	4.52262	-1.0313	5.68246	5.30978	-3.73568	9.15289	31.1077	23.6067	108.715	566.84	163.026
gene-BSU_14970	ylbD	sporulation-related protein (coat)	2.92381	6.71972	6.64067	3.1962	-2.47378	5.51801	11.3672	20.2839	295.519	945.739	230.417
gene-BSU_14980	ylbE	conserved hypothetical protein	2.77666	9.03288	8.63186	3.33479	-2.6861	1.96579	3.84958	3.45866	187.445	660.001	136.711
gene-BSU_14990	ricF	subunit of a sporulation, competence and biofilm formation regulatory complex controlling RNase Y (RicAFT complex / FAD / two [4Fe-4S]2+)	-1.07388	1.41074	2.54836	-1.50682	1.36597	84.0485	103.215	116.211	188.992	107.566	172.103
gene-BSU_15470	pyrR	transcriptional attenuator and uracil phosphoribosyltransferase activity	1.26893	1.38936	2.27806	-1.06746	1.41424	12.2412	15.2291	17.1033	20.1246	13.1868	57.4998
gene-BSU_15800	thiN	thiamine pyrophosphokinase	1.33141	3.05225	1.69448	1.49944	-1.4286	32.4279	40.8886	96.5208	161.725	170.401	111.551
gene-BSU_16730	spoVFA	spore dipicolinate synthase subunit A	1.46884	15.9227	10.4195	3.24483	-2.81738	10.2028	8.83126	22.7483	967.506	3019.7	926.743
gene-BSU_16740	spoVFB	spore dipicolinate synthase subunit B	1.67038	14.3216	10.0902	3.01032	-2.9771	13.5617	11.8395	33.3821	1476.99	4505.38	1198.86
gene-BSU_16750	asd	aspartate-semialdehyde dehydrogenase	-2.38809	2.43052	7.8197	2.88281	-2.75962	304.103	144.987	104.657	1541.83	4475.02	1404.25
gene-BSU_16760	dapG	aspartokinase I (alpha and beta subunits)	-2.29468	1.91633	7.57011	2.2285	-2.76045	205.09	124.085	63.1099	738.416	2025.35	621.174
gene-BSU_16770	dapA	4-hydroxy-tetrahydrodipicolinate synthase	-2.00691	1.77302	6.00934	1.7543	-2.37382	330.92	208.775	140.248	999.528	2198.34	837.525
gene-BSU_17240	ymzB	conserved protein of unknown function involved in ethanol resistance	1.17646	2.43862	2.91753	1.26252	-1.56569	68.0594	86.3436	157.529	399.572	557.781	243.295
gene-BSU_17260	aprX	alkaline serine protease	1.0796	-2.44071	12.8349	9.99439	2.4986	47.037	62.2506	29.2776	50.5714	947.201	5301.38
gene-BSU_17310	ymaG	inner spore coat protein; cell wall associated protein	1.43035	96.02	35.6257	3.11705	-3.82026	1.13959	2.43452	7.14289	3759.62	16114.1	2158.23
gene-BSU_17410	cwlC	N-acetylmuramoyl-L-alanine amidase (sporulation-specific)	-1.23258	-1.95348	1.65733	14.5363	2.57171	28.3606	34.2307	20.9411	10.6503	124.755	548.665
gene-BSU_17670	cotU	spore coat protein	-1.90738	-1.39326	29.3346	6.11864	-1.13744	6.32669	2.25263	7.15585	9.25062	88.5751	423.716
gene-BSU_17679	.	conserved hypothetical protein from phage origin	-1.31492	3.54044	2.56731	8.98625	-1.92459	2.38278	2.03614	3.77309	16.1259	103.045	48.4512
gene-BSU_17680	thyA	thymidylate synthase A (phage origin)	-1.01077	1.5414	2.22169	2.99661	-1.83679	11.2331	11.1988	16.6757	24.0503	70.8951	38.2671
gene-BSU_17700	cotC	spore coat protein (outer)	1.08387	-1.15196	1.12777	37.6786	2.93811	24.6457	19.2218	106.857	6.12857	253.983	4024.99
gene-BSU_17960	yneK	factor interacting with DynA	1.449	-1.12258	1.01588	2.46225	-1.58666	57.0034	91.8222	89.0061	48.3548	84.4217	99.9695
gene-BSU_17970	cotM	spore coat protein (outer)	4.08618	33.08	5.82468	2.18224	-1.34739	1.40056	3.63319	38.0189	1418.66	2238.76	1093.81
gene-BSU_18280	yngK	putative exported glycoside hydrolase	1.76351	22.1158	5.59679	2.14345	-1.80578	1.02585	1.15056	6.76842	105.104	210.983	63.8283
gene-BSU_18620	yoaI	putative 4-hydroxyphenylacetate-3-hydroxylase	3.21848	2.25902	7.80574	3.46895	-4.36078	2.16616	4.04915	10.0759	53.6853	191.447	51.9612
gene-BSU_18650	pelB	endo-pectin lyase	-1.03504	2.06012	-1.67285	2.45662	-1.39198	4.46943	3.56031	5.59784	3.37036	5.18143	4.65316
gene-BSU_18670	oxdD	oxalate decarboxylase (Mn2+-dependent); spore constituent	3.00614	14.681	3.97636	2.04099	-1.19029	1.66734	6.12656	12.937	234.792	458.089	211.191
gene-BSU_18870	yozI	conserved hypothetical protein; putative defective prophage 6	1.29666	1.22311	-1.7085	2.27947	-1.06327	7.08974	7.34347	13.6079	2.82718	6.16236	9.55621
gene-BSU_18978	bsrE	type I toxin (BsrE/AsrE)	1.1158	-1.89499	2.31026	1.29042	-1.51247	129.362	287.195	244.338	66.7579	67.6254	304.448
gene-BSU_19180	desE	fatty acid desaturase	-1.12109	1.48869	2.76907	-1.0262	1.52342	53.6091	62.1009	102.878	143.308	75.7297	220.102
gene-BSU_19490	gerT	component of the spore coat	8.18561	15.0099	7.76114	1.76298	-1.77699	0.995338	8.15101	32.8354	736.195	1189.84	393.539
gene-BSU_19510	yojB	conserved hypothetical protein	-1.9298	2.96083	40.0581	1.84803	-4.32549	84.9355	35.0848	23.6415	1945.79	5469.46	694.314
gene-BSU_19600	yodH	putative S-adenosylmethionine-dependent methyltransferase	1.10643	3.73884	36.0992	3.42247	-5.26659	7.50473	8.01623	12.8591	494.702	2346.5	393.839
gene-BSU_19610	yodI	putative spore coat protein	-3.09294	1.86454	70.5918	4.36782	-3.05565	37.1316	10.3322	11.1171	455.977	3367.47	2195.57
gene-BSU_19670	yodN	conserved hypothetical protein	2.28899	2.13609	10.7625	4.6074	-2.18468	3.34849	4.44005	7.46584	66.7112	314.442	209.351
gene-BSU_19749	yoyG	putative toxin of a type I toxin family (sporulation operon)	-1.65363	2.4366	23.999	3.33206	-5.79382	13.7773	5.0251	12.4157	175.827	622.8	128.116
gene-BSU_19750	cgeE	protein involved in maturation of the outermost layer of the spore	-1.35008	2.11303	2.84371	3.70844	-2.44613	18.045	9.26053	24.3437	26.2793	129.843	103.454
gene-BSU_19760	cgeD	putative glycosyltransferase involved in maturation of the outermost layer of the spore	-1.35881	2.45753	5.6242	4.14919	-2.96562	25.3512	11.9987	32.5616	77.8147	413.623	277.975
gene-BSU_19770	cgeC	protein involved in maturation of the outermost layer of the spore	-2.6178	2.18748	55.0972	2.98492	-2.32324	38.8019	9.88128	22.7187	492.415	2199.29	1742.8
gene-BSU_19780	cgeA	spore outermost layer component	-1.62227	-1.56226	100.389	3.61603	1.00266	319.417	150.64	108.148	3299.13	17995.3	41381.7
gene-BSU_19790	cgeB	protein involved in maturation of the outermost layer of the spore	-2.15486	-1.46207	164.008	3.14737	-1.33841	349.227	121.936	77.548	4675.16	22331.6	35830.2
gene-BSU_20190	yosA	putative type I toxin; phage SPbeta	-2.60904	-2.37393	22.8823	7.1927	-1.23636	133.674	46.8949	32.8573	48.8631	1125.91	2397.64
gene-BSU_20928	yoyH	conserved protein of unknown function; phage SPbeta	1.04872	2.96307	-1.02292	1.43049	1.51019	1.31053	1.86646	8.07021	1.9162	3.61446	9.71548
gene-BSU_20929	yoyI	conserved membrane protein of unknown function; phage SPbeta	1.04394	2.21001	1.25959	1.11545	1.48516	19.0622	11.2715	30.0949	31.9959	21.2174	33.5265
gene-BSU_21050	hupN	HU-related DNA-binding protein; phage SPbeta	2.61427	1.23134	1.80629	1.7488	-1.19221	2.81834	1.80626	5.95039	8.83041	9.01672	5.6711
gene-BSU_21120	yonE	conserved protein of unknown function; phage SPbeta	3.2601	-1.01437	1.36257	2.66668	-1.0902	0.103395	0.552208	0.477527	0.194374	0.684395	1.25926
gene-BSU_21300	yomM	putative integrase; phage SPbeta	2.60544	1.6374	2.81389	3.66567	-1.89994	0.470848	0.838232	1.13908	3.24557	10.8217	5.23589
gene-BSU_21780	silP	transcriptional enhancer involved in BCAA homeostasis	1.03334	-1.10557	1.21812	1.1354	2.41208	13.7369	19.2268	15.1056	10.7848	6.40152	42.0558
gene-BSU_22019	ypzF	hypothetical protein	-2.03416	6.32496	4.74869	1.09917	-1.23448	97.8884	69.7067	143.993	869.832	822.622	485.491
gene-BSU_22190	ypsA	conserved protein of unknown function	1.13344	2.01736	1.53199	1.007	-1.13624	10.2346	13.5985	13.67	24.5586	16.661	16.9195
gene-BSU_22200	cotD	spore coat protein (inner)	-3.046	2.3331	308.74	2.43562	-5.9595	112.43	39.4168	53.7003	11744.2	38217.2	10030.3
gene-BSU_22205	.	conserved protein of unknown function	-1.68853	1.72469	1.30768	2.86686	-2.57703	12.8005	9.11529	8.84774	9.1672	31.9418	10.9743
gene-BSU_22230	ypqE	putative phosphotransferase system enzyme IIA component	1.8176	2.48947	1.64362	1.22275	-1.23751	5.42822	8.44879	16.7817	28.9617	28.7446	23.1595
gene-BSU_22250	yppG	putative spore coat protein; methionine-glutamine-rich protein	18.7325	4.03959	3.86254	2.53604	-2.29631	2.49624	41.1067	134.229	731.024	1732.76	540.63
gene-BSU_22260	yppF	putative sporulation protein	-1.51384	1.40384	2.4591	1.62447	-2.24891	38.6918	37.3293	25.2537	77.1694	130.121	50.6703
gene-BSU_22680	trpE	anthranilate synthase	-1.15113	-1.01975	2.21791	1.01961	1.09983	12.0894	9.82064	8.17746	12.7641	9.13422	14.3634
gene-BSU_22970	mecB	adaptor to ClpC; regulator of competence and sporulation	1.14261	1.90958	4.84727	2.84162	-2.33895	87.5029	97.3433	116.885	567.027	1673.92	628.766
gene-BSU_23040	fer	ferredoxin	-1.28783	1.27617	2.68504	1.84988	-1.15725	113.684	70.4984	82.5079	228.163	328.35	253.84
gene-BSU_23050	fmnP	FMN permease	-1.58385	2.17947	1.85711	-1.20955	1.1714	38.5611	25.7982	49.4353	61.1407	27.1747	68.597
gene-BSU_23230	ypuF	conserved protein of unknown function	5.85685	2.94846	2.04183	2.73394	-2.1316	0.898648	3.51962	12.0559	16.2369	40.482	29.0275
gene-BSU_23240	ypzK	putative riboflavin synthesis-related N-acetyltransferase	-1.00848	1.21022	1.33474	2.93272	-1.66105	149.086	116.467	169.89	124.827	342.709	268.258
gene-BSU_23250	ribH	6,7-dimethyl-8-ribityllumazine synthase, beta subunit	-1.46607	1.12904	1.91991	4.30151	-2.48534	193.113	101.692	91.4872	121.012	534.474	290.838
gene-BSU_23350	ypzD	putative germination protein	-6.13848	-1.4935	210.053	3.57274	-1.76377	36.178	5.1262	4.87136	139.493	1023.25	1496.61
gene-BSU_23370	ypuA	putative exported protein	-1.15452	2.10921	2.31039	1.46616	-2.75919	56.4743	61.093	87.8334	93.129	180.897	148.332
gene-BSU_23800	proI	pyrroline-5-carboxylate reductase (NADP-dependent, weak activity)	-1.08899	1.47556	1.74303	-1.4124	2.01105	3.47595	3.71286	3.84296	4.53294	2.17645	7.95943
gene-BSU_25000	pbpA	transpeptidase (penicillin-binding protein 2A)	-2.75591	1.72428	2.07437	1.88495	-1.85328	97.8235	34.8303	28.171	57.4516	110.622	67.8284
gene-BSU_25090	yqfW	putative nucleotidase	1.15405	2.07942	1.77833	-1.22186	2.46528	27.6967	25.6879	50.9885	91.5204	32.5674	141.797
gene-BSU_25120	yqfT	conserved protein of unknown function	17.6744	9.36074	5.69727	1.67956	-1.56528	4.93375	48.4183	408.122	2051.33	3255.91	1738.99
gene-BSU_25150	yqfQ	conserved protein of unknown function	4.16482	8.06113	21.2002	2.29679	-4.08271	1.47963	2.70938	13.2489	460.749	1390.93	235.388
gene-BSU_25160	ispH	1-hydroxy-2-methyl-2-(E)-butenyl 4-diphosphate reductase	-1.41799	1.28385	5.61931	2.233	-3.00566	35.4467	27.4637	21.6304	102.406	265.198	90.1491
gene-BSU_25500	hemN	coproporphyrinogen III oxidase	1.21885	1.12528	1.32759	2.01649	-1.29902	35.4532	44.5004	43.6884	40.7156	68.2943	49.0888
gene-BSU_25565	.	hypothetical protein	1.57037	3.64647	10.4189	4.23473	-1.86316	7.33896	13.4385	13.8347	333.419	1377.54	986.538
gene-BSU_25700	yqeF	putative lipoprotein; putative esterase	1.01352	1.06851	2.10007	-1.59917	1.69849	8.16395	7.34347	5.95344	9.62587	3.55521	9.32868
gene-BSU_25710	cwlH	N-acetylmuramoyl-L-alanine amidase	-2.13472	1.54243	7.055	5.64701	-1.71048	27.3592	10.8195	18.7402	41.0941	313.061	277.253
gene-BSU_25740	yqeB	conserved protein of unknown function	-1.15006	1.41257	2.15593	-1.36706	1.68087	98.0993	90.4964	94.001	170.243	68.9298	169.661
gene-BSU_25820	yqcI	conserved protein of unknown function; skin element	5.82622	15.5562	4.20189	2.80041	-1.25788	0.616719	1.64688	9.08747	123.796	281.276	143.365
gene-BSU_26100	yqbI	putative phage tail component; skin element	-1.21374	1.77716	3.548	2.01091	-1.44172	0.780076	0.666594	0.617618	3.12849	7.31499	4.13073
gene-BSU_26550	yrkD	putative metal-sensitive transcriptional regulator involved in sulfur metabolism	1.24063	3.76036	1.73715	2.60315	-1.14397	2.0477	3.06217	7.56583	12.5751	28.9157	23.4213
gene-BSU_26560	yrkC	putative enzyme; cupin family	1.38798	3.31312	5.09324	3.59589	-1.94696	32.9384	44.7652	90.813	448.909	1819.06	656.853
gene-BSU_26610	yrkA	putative membrane associated protein	1.79114	-1.36815	-1.05079	2.97232	1.30928	49.5289	84.5701	46.9901	26.6569	29.0819	136.559
gene-BSU_26810	murI	glutamate racemase	-1.296	-1.0366	-1.33253	3.14813	-1.21976	5.12387	3.89432	3.38065	1.54366	2.98941	6.88745
gene-BSU_26826	yrpDX	expressed polypeptide of unknown function	-1.10818	-1.94847	1.75816	5.99124	2.33618	274.203	261.664	121.053	69.4885	339.203	2407.52
gene-BSU_27000	adhR	transcriptional regulator regulated by thiol-alkylation	1.19894	1.19461	-1.03083	2.97023	-1.85021	6.87795	8.33952	6.62297	6.29026	14.2528	7.28415
gene-BSU_27085	.	hypothetical protein	-1.75186	1.09137	2.24719	1.01241	1.07757	13.3841	7.14816	1.47177	9.43539	5.53705	12.9934
gene-BSU_27185	.	hypothetical protein	1.09276	1.6819	2.56072	2.37821	-1.35065	94.9515	105.121	199.036	250.707	607.775	555.694
gene-BSU_27250	mccB	cystathionine gamma-lyase and homocysteine gamma-lyase for reverse transsulfuration pathway	-3.94408	1.82794	3.15005	1.43976	-1.15516	10.3463	7.58865	5.82512	30.2558	40.5961	23.1565
gene-BSU_27260	mccA	cystathionine beta-synthase for the reverse transsulfuration pathway	-2.05536	2.01902	2.47716	1.5161	-1.22734	8.42482	6.81744	5.9516	20.904	27.1319	16.8534
gene-BSU_27270	mtnN	methylthioadenosine / S-adenosylhomocysteine nucleosidase	-1.44208	1.43267	5.15164	2.06123	-1.88596	68.2378	47.6672	40.9971	227.962	538.68	181.507
gene-BSU_27290	yrzA	conserved protein of unknown function	-1.12613	2.11706	6.98382	2.35763	-1.86333	2.3127	4.94064	3.05176	32.3661	71.2262	39.1885
gene-BSU_27786	.	hypothetical protein	1.42854	5.11418	1.3683	1.94059	-1.46277	1.27856	2.04856	9.27934	12.8192	15.1631	7.44741
gene-BSU_27800	yrzH	hypothetical protein	3.20853	2.64195	1.20786	1.4886	1.45683	1.62127	2.88628	7.13126	6.26504	7.30345	15.7394
gene-BSU_27870	nadB	L-aspartate oxidase	3.13026	2.64975	1.88994	1.57251	-1.20755	1.0839	2.42079	5.98115	11.6083	16.795	9.18327
gene-BSU_28099	yszA	conserved protein of unknown function	-1.52493	38.407	5.87103	1.49535	-1.43185	2.86678	0.874905	7.02541	321.306	406.853	185.201
gene-BSU_28180	ysxD	putative integral inner membrane protein	1.0595	-1.15342	2.1419	-1.43616	1.6605	17.2105	17.0343	20.0019	18.1066	9.40631	20.2336
gene-BSU_28320	cotQ	inner spore coat protein	28.5365	15.2976	7.51534	1.63203	-1.96424	0.234023	10.7488	71.6437	1241.23	1933.22	544.018
gene-BSU_28390	rcmE	glutamate racemase	-1.69179	1.49937	3.74073	3.09021	-2.08398	59.7178	46.6616	45.482	83.2659	383.795	206.41
gene-BSU_28400	ysmB	putative transcriptional regulator (mother cell's gene expression during sporulation)	-1.11927	1.10999	2.40368	4.62259	-1.37234	34.9474	27.8065	23.7636	39.7765	186.772	183.546
gene-BSU_28410	gerE	transcriptional regulator required for the expression of late spore coat genes	-2.64867	8.44347	31.4593	2.10664	-2.05636	382.325	148.944	122.667	17070.8	50095.1	32766.9
gene-BSU_28490	uvrC	excinuclease ABC (subunit C)	-1.20379	1.36879	2.76376	2.23247	-1.88218	23.6826	18.8068	17.2641	43.4931	90.9303	52.0414
gene-BSU_29020	gapB	glyceraldehyde-3-phosphate dehydrogenase (NADP-dependent, gluconeogenesis)	-2.56428	3.48868	2.92646	-1.52852	2.1225	670.483	267.818	623.776	1990.55	364.033	1190.85
gene-BSU_29040	ytbD	putative transporter	-1.15444	1.1515	2.14039	-1.36937	1.45648	1.18839	0.987298	0.8712	2.02721	1.2382	1.46833
gene-BSU_29060	coaE	dephosphocoenzyme A kinase	-1.01494	2.43932	2.5192	1.8591	-1.26253	54.9363	47.0858	75.8111	201.491	323.914	162.626
gene-BSU_29070	spcF	membrane calmodulin-like protein essential for stage III sporulation	-1.01979	2.19881	2.81162	2.00424	-1.42547	95.153	85.3178	115.726	331.605	660.607	300.739
gene-BSU_29150	ytwI	putative integral membrane protein	-1.0053	3.48743	10.8538	2.05281	-1.9319	22.1521	18.7851	18.9669	260.038	677.84	268.094
gene-BSU_29260	ytpI	conserved protein of unknown function	1.43067	1.79406	1.46027	2.76656	-1.80216	263.922	329.311	567.769	522.822	1626.29	1301.08
gene-BSU_29280	ytnM	putative transporter	1.13402	2.23267	1.07926	1.18734	1.13975	1.04494	1.95328	2.29812	2.67377	2.4977	2.76663
gene-BSU_29300	ribR	FMN-riboswitch-binding activator of rib genes	-1.24179	3.29985	1.5655	1.30917	-1.11278	1.81545	1.09079	1.34753	3.4129	3.88046	4.08567
gene-BSU_29310	cmoJ	monooxygenase (S-alkyl substrates)	1.84824	2.87731	1.52732	1.48389	-1.43335	1.12416	1.32717	2.18606	3.6705	5.41761	2.94503
gene-BSU_29330	cmoO	monooxygenase (S-alkyl substrates)	1.76402	2.96161	3.18711	1.82734	-1.77093	1.25185	1.50432	1.75514	4.8048	10.3579	5.80029
gene-BSU_29400	ascR	transcriptional regulator of operon snaA-ytnM degrading cysteine-containing compounds (AscR-N-acetylcysteine)	-3.03717	2.55792	1.59204	1.88539	-1.23417	0.848238	0.724841	2.01476	2.44508	3.93029	3.234
gene-BSU_29690	acuA	protein acetyltransferase (acetylates AcsA)	-1.29302	-1.40427	1.50685	2.30132	-1.01997	74.4082	43.5213	24.5876	23.5081	41.8661	97.3522
gene-BSU_29790	murC	UDP-N-acetyl muramate-alanine ligase	-1.70484	1.46945	2.06085	2.11102	-1.38931	154.358	106.104	109.431	156.432	376.038	289.766
gene-BSU_29930	amyX	pullulanase	-1.37585	1.33726	3.90839	2.60242	-3.03693	120.518	80.3696	69.9429	236.157	674.914	171.686
gene-BSU_29940	ytlR	putative phospholipid kinase	-2.09452	1.28076	5.85692	2.71519	-2.75192	116.087	49.7623	30.1238	213.148	578.501	172.282
gene-BSU_30330	ytvB	putative conserved membrane protein	6.0254	1.18344	1.92021	1.88514	-1.09979	11.7011	45.745	114.877	170.405	276.765	216.863
gene-BSU_30595	ytlA	putative ABC anion transporter component	2.19425	108.915	3.13553	1.36178	-1.14329	0.704164	1.33717	12.4925	505.779	550.477	321.833
gene-BSU_30610	ytlC	putative ABC anion transporter component, ATP-binding	1.57407	113.781	3.17231	1.3575	-1.17107	0.803389	0.750876	9.01107	302.313	357.513	189.949
gene-BSU_30620	ytlD	putative permease of ABC anion transporter	1.40076	123.532	3.87877	1.11706	-1.21333	1.25733	2.27282	22.845	971.716	1000.47	408.9
gene-BSU_30630	rppG	nucleoside and RNA triphosphate phosphohydrolase	2.05174	1.73969	1.00209	1.92771	4.37069	10.0556	14.6148	34.8042	19.7301	21.6413	137.047
gene-BSU_30640	ytkC	putative autolytic amidase	2.68372	-1.50569	2.7292	5.81226	3.29714	4.27135	15.3465	17.6776	17.7629	83.3201	340.093
gene-BSU_30740	mntD	manganese ABC transporter (permease)	1.4564	1.19075	2.56742	10.5372	1.13167	35.7739	45.0221	46.505	95.7175	749.22	701.747
gene-BSU_30750	mntC	manganese ABC transporter (permease)	1.37784	1.24686	2.49267	11.4058	1.14535	32.0418	34.7394	40.2982	77.5646	642.512	641.311
gene-BSU_30760	mntB	manganese ABC transporter (ATP-binding protein)	1.2576	-1.37288	3.87003	14.3652	1.14016	25.0619	23.7584	20.3937	45.8056	505.737	494.566
gene-BSU_30770	mntA	manganese ABC transporter (manganese binding lipoprotein)	1.23594	-1.261	2.83432	21.6585	1.10954	17.5022	18.7862	19.2649	26.5361	445.179	488.08
gene-BSU_30850	ytdA	putative UTP-glucose-1-phosphate uridylyltransferase	4.59907	4.71284	5.80988	2.7585	-2.89495	1.0561	8.20424	25.4649	169.36	586.311	137.267
gene-BSU_30880	ytcC	putative glucosyltransferase	2.09356	37.3149	18.1377	4.18864	-3.80395	0.706657	1.09792	3.2213	591.284	2383.63	436.448
gene-BSU_30900	cotS	spore coat protein	3.93005	2.03491	99.4766	3.73811	-8.11102	1.78708	4.29499	12.8717	647.93	3019.68	297.852
gene-BSU_30910	cotSA	spore coat protein	3.3789	2.24144	67.4937	4.79473	-7.74902	0.901421	2.29605	7.68592	296.555	1950.82	252.03
gene-BSU_30920	cotI	spore coat kinase	-1.10501	21.0495	48.3948	3.1888	-6.8086	1.90356	1.17306	26.2781	1178.35	5076.08	642.013
gene-BSU_31110	yubF	conserved protein of unknown function	-2.14583	1.08034	4.55272	1.35078	-1.90606	55.1017	28.9514	21.6166	58.9791	90.033	72.5507
gene-BSU_31220	rhaE	bifunctional rhamnulose-1-phosphate aldolase/alcohol dehydrogenase	1.03764	1.03616	2.74801	-1.73496	-1.02393	28.2998	25.9276	17.1429	38.4906	14.5836	22.2068
gene-BSU_31270	tgl	protein-glutamine gamma-glutamyltransferase (transglutaminase)	-1.22642	30.901	7.62345	1.82078	-2.09047	2.87677	2.95903	5.20205	390.718	700.501	217.103
gene-BSU_31330	yugN	conserved protein of unknown function	-1.06026	-1.05814	1.84394	1.31411	-2.42911	458.782	353.384	391.726	432.392	666.561	254.145
gene-BSU_31340	yugM	putative transporter	-1.08364	1.0163	1.60918	1.59092	-2.89986	528.439	365.315	398.862	425.847	725.807	270.422
gene-BSU_31390	yugI	putative RNA degradation protein; putative phosphorylase or nucleotidyl transferase; general stress protein	-1.37746	1.31847	2.4497	1.32375	-1.21492	119.048	80.9989	89.7668	108.452	93.0379	207.871
gene-BSU_31470	kapD	putative exoribonuclease (3'-5')	4.63279	1.52597	1.98111	3.88327	-1.2891	9.41544	34.7923	69.8448	71.7578	264.242	272.465
gene-BSU_31720	degQ	pleiotropic regulator	3.59386	2.12437	1.1196	1.69336	-1.35631	0.557671	8.9352	26.4919	19.5697	20.6101	12.4027
gene-BSU_31780	yueH	conserved hypothetical protein	-1.14159	-1.06184	2.20924	1.38705	1.0241	20.5263	12.4806	13.3346	22.9548	21.0771	37.4573
gene-BSU_31790	yueG	putative spore germination protein	-1.69601	2.4492	5.49485	2.39424	-1.63156	63.7554	53.7239	52.8147	422.822	1115.4	416.003
gene-BSU_31810	yuzE	conserved protein of unknown function	1.82576	2.04049	5.19501	2.91871	-2.49037	8.06479	8.82981	18.8896	53.1903	220.871	75.5886
gene-BSU_31820	yuzF	conserved protein of unknown function	1.43375	2.13738	2.32339	3.34122	-1.28546	82.2812	80.8014	136.157	297.513	1002.17	726.992
gene-BSU_31830	yueE	putative metal-dependent phosphohydrolase	1.77441	1.7397	1.00226	3.23176	1.64956	55.5308	63.9027	112.162	84.3499	196.039	506.868
gene-BSU_32160	sufA	sulfur carrier chaperone involved in Fe-S cluster assembly	-1.01038	-1.0465	2.62578	2.05618	-1.63201	188.889	181.865	158.927	268.901	618.462	317.273
gene-BSU_32170	dapF	diaminopimelate epimerase	-2.04152	2.49352	5.43601	2.93409	-2.21829	20.6006	12.6723	15.2909	82.872	300.064	102.658
gene-BSU_32220	yutI	putative iron-sulfur scaffold protein	1.02524	1.11569	2.18255	1.04674	-1.52437	345.886	324.715	392.496	547.73	540.879	328.393
gene-BSU_32360	yunC	conserved protein of unknown function	-1.57775	1.2056	27.7532	2.08825	-2.95177	129.511	87.8336	77.6504	1265.34	3904.05	1197.43
gene-BSU_32469	yuzJ	putative type I toxin	-1.40483	1.02204	1.66012	9.87802	3.35893	34.5503	23.5429	40.8751	11.5719	103.834	1438.4
gene-BSU_32510	pucA	xanthine dehydrogenase molybdopterin recruitment factor	2.88928	-1.01516	1.54599	1.86323	-1.98253	2.45477	4.4829	3.86618	3.22537	7.94963	4.44472
gene-BSU_32650	yurS	conserved protein of unknown function	-3.8684	-4.56987	175.044	5.75214	-1.45334	38.4611	10.0424	1.12783	40.8829	592.929	1104.91
gene-BSU_32850	putM	proline dehydrogenase 1	24.3455	6.4794	4.84338	2.28777	-2.52988	0.086503	14.3219	52.2795	448.017	953.741	278.501
gene-BSU_33590	yvaG	putative oxidoreductase	1.6931	2.00481	1.428	1.2946	-1.40664	35.1123	58.5295	121.249	101.46	149.107	92.4935
gene-BSU_33800	opuCD	glycine betaine/carnitine/choline/choline sulfate ABC transporter (promiscuous permease)	2.07824	1.05456	1.82719	1.54758	1.00393	33.276	86.4254	70.677	105.474	110.194	70.1204
gene-BSU_33810	opuCC	glycine betaine/carnitine/choline/choline sulfate ABC transporter (osmoprotectant-binding lipoprotein)	2.22145	1.12386	1.5367	1.74372	1.01659	27.6763	66.677	51.1973	82.5551	80.3267	60.5391
gene-BSU_33820	opuCB	glycine betaine/carnitine/choline/choline sulfate ABC transporter (promiscuous permease)	2.22472	1.00399	1.57478	1.79638	-1.01863	19.2371	52.398	35.0626	57.1846	62.5402	44.0571
gene-BSU_33830	opuCA	glycine betaine/carnitine/choline/choline sulfate ABC transporter (ATP-binding protein)	1.87546	1.36511	1.55232	2.16651	-1.05108	18.712	55.7	50.5637	63.7584	98.283	77.1556
gene-BSU_33840	opcR	negative transcriptional regulator of choline uptake systems	2.0953	1.75846	1.05522	2.63281	-1.16283	2.25467	4.66616	7.43798	4.2386	6.918	19.5504
gene-BSU_34460	levB	endolevanase, selectively cleaves the (beta-2,6) fructosyl bonds	3.02842	3.30236	1.71843	1.27852	-1.11726	0.20279	0.59568	0.735886	2.63683	2.26516	0.751682
gene-BSU_34520	cotNP	spore coat protein; putative oxidoreductase	1.17917	3.65428	48.8425	1.69561	-7.32263	17.9613	11.9987	33.5058	1050.66	2495.17	405.968
gene-BSU_34530	cotR	spore coat lipolytic enzyme	1.61485	1.91877	29.0233	2.51729	-4.80411	28.4968	33.0556	64.4324	835.197	3013.72	845.468
gene-BSU_36030	ywrK	putative Na+/H+ antiporter	-3.71417	1.44268	140.65	4.08971	-3.26211	38.1621	6.31986	6.87048	431.97	3213.76	1781.56
gene-BSU_36040	ywrJ	conserved protein of unknown function	13.4797	7.62157	10.0946	3.00479	-3.37333	0.231952	4.21193	19.1298	298.549	826.656	169.13
gene-BSU_36050	cotB	spore coat protein (outer)	9.27708	9.48225	13.305	3.18304	-3.68757	1.71985	10.1406	40.3965	981.594	3187.82	555.389
gene-BSU_36060	cotH	spore coat protein kinase	12.3433	9.47904	2.98819	2.22501	-1.04006	0.794259	8.79243	30.5849	204.425	395.46	207.157
gene-BSU_36070	cotG	spore morphogenetic protein	-2.69261	-2.34207	172.239	4.46085	-1.22754	293.933	91.133	30.1751	2235.08	10738.3	20532.8
gene-BSU_36269	ywzD	conserved protein of unknown function	-1.0801	8.01723	2.96314	3.65282	-1.27097	8.1908	2.33308	16.5728	108.128	243.976	212.237
gene-BSU_36350	ywpD	putative two-component sensor histidine kinase	1.69113	2.42367	2.15077	1.59288	-1.02497	0.375779	1.00347	2.2314	4.17973	6.11479	5.27313
gene-BSU_36575	.	hypothetical protein	2.19024	3.18032	1.34752	1.62202	-1.28819	8.93542	24.8155	52.666	81.003	115.991	41.0069
gene-BSU_36580	ywnF	conserved protein of unknown function	3.82333	1.99837	2.67818	2.10403	-1.89541	25.126	70.089	174.364	208.196	441.812	345.163
gene-BSU_36760	murAA	UDP-N-acetylglucosamine 1-carboxyvinyltransferase	-2.02646	1.60573	4.29237	2.56173	-3.13173	404.614	295.281	251.841	763.16	2878.83	910.632
gene-BSU_36990	ywkF	conserved protein of unknown function	-1.57476	2.10943	8.66161	1.74833	-2.42295	34.9474	32.6631	37.8291	310.014	577.712	195.466
gene-BSU_37250	narI	nitrate reductase (gamma subunit)	3.64337	2.4297	2.55419	1.72929	-1.95815	4.21241	8.99902	23.0063	34.169	75.2583	28.2542
gene-BSU_37440	ywhL	conserved protein of unknown function	1.18601	-1.9666	1.18647	26.5154	8.28492	34.148	47.0276	20.6465	6.04739	69.2654	3840.11
gene-BSU_37450	ywhK	factor interacting with DNA helicase PcrA	1.0558	-2.70839	1.78282	29.409	8.00729	31.7774	35.9872	12.8552	2.10758	59.5587	3440.89
gene-BSU_37560	thrZ	threonyl-tRNA synthetase	2.24405	1.37551	2.06266	1.44475	-1.64937	7.30122	18.1389	27.6044	40.8429	53.7361	19.1139
gene-BSU_37569	.	hypothetical protein	1.73216	1.81537	7.95171	2.08699	-2.07416	34.2753	52.7635	95.1132	438.41	1057.93	416.912
gene-BSU_37810	spsL	putative dTDP-4-deoxyrhamnose-3,5-epimerase (cell surface and spore coat)	4.74131	4.23634	3.5533	2.33132	-1.93532	44.8339	126.723	433.471	1268.04	3689.61	2334.82
gene-BSU_37820	spsK	putative dTDP-4-dehydrorhamnose reductase	4.58927	3.84603	3.20524	2.64416	-1.76422	37.9315	82.315	329.913	716.204	2276.65	1839.88
gene-BSU_37830	spsJ	dTDP-glucose 4,6-dehydratase	4.11366	3.57381	3.60933	2.67702	-1.86837	47.3615	96.4832	327.041	881.157	2853.96	2135.12
gene-BSU_37840	spsI	glucose-1-phosphate thymidylyltransferase	-1.1786	4.60932	11.4278	3.3439	-1.93088	33.8509	22.1029	39.2075	483.029	2189.63	1859.03
gene-BSU_37850	spsG	putative glycosyltransferase	-1.23214	4.67572	11.6069	3.48929	-1.94307	36.001	17.2922	31.9418	535.779	2384.01	1953.47
gene-BSU_37860	spsF	putative glycosyltransferase	-1.22924	4.88172	11.5931	3.12549	-1.83774	48.1796	28.694	40.6142	648.804	2808.42	2373.18
gene-BSU_37870	spsE	putative phosphoenolpyruvate-sugar pyruvyltransferase	-1.4299	5.39924	12.6756	2.95876	-1.8456	49.6179	24.9278	46.5162	792.112	3399.53	2872.56
gene-BSU_37880	spsD	putative TDP-glycosamine N-acetyltransferase	-1.23719	5.68206	10.6192	3.14791	-1.99899	31.7238	18.9221	30.1739	482.769	2036.91	1512.07
gene-BSU_37890	spsC	putative glutamine-dependent sugar transaminase	-1.2438	5.42612	12.0094	3.11628	-2.15066	36.1571	20.9618	38.3113	596.001	2550.33	1732.84
gene-BSU_37900	spsB	putative dTDP glycosyl/glycerophosphate transferase or transport	-1.36886	5.14376	11.2333	3.52705	-1.95216	27.259	14.1458	22.4267	394.743	1832.46	1345.03
gene-BSU_37910	spsA	spore coat dTDP-glycosyltransferase	-1.27158	5.60415	12.9066	3.2567	-1.94796	21.1112	8.49713	20.8596	462.955	1777.92	1351.31
gene-BSU_37970	ung	uracil-DNA glycosylase	-1.34123	1.0273	2.09615	1.78356	-2.78676	24.9348	24.0328	21.8845	18.6048	51.3702	24.8107
gene-BSU_38120	rodA	glycosyltransferase involved in extension of the lateral walls of the cell	-2.00387	1.84902	1.65109	-1.06323	-1.05433	22.6182	14.0695	18.7856	20.6349	12.7699	30.5766
gene-BSU_38130	ywcE	holin-like protein required for proper spore morphogenesis and germination	2.20929	-2.12682	1.78101	3.96963	1.41927	27.4019	221.431	130.486	92.7615	193.702	415.432
gene-BSU_38360	rlmI	large subunit ribosomal RNA m5C1962 methyltransferase	-1.4941	1.12353	2.58911	2.50452	-1.4997	21.6551	16.3609	15.4202	24.5748	69.9221	43.211
gene-BSU_38380	ywbB	conserved protein of unknown function	1.18789	1.30778	2.77776	2.75623	-1.22584	14.0331	12.0164	10.4066	33.4305	92.6326	40.778
gene-BSU_38390	ywbA	putative cellobiose phosphotransferase system enzyme IIC permease component	-1.12141	5.17902	5.03279	2.68684	-1.96891	7.71592	5.85105	18.1094	149.962	435.62	108.04
gene-BSU_38450	tyrZR	transcriptional regulator controlling expression of tyrZ	2.32782	-1.2162	2.39049	1.64124	1.88938	94.9371	228.045	224.411	377.861	276.044	891.823
gene-BSU_38460	tyrZ	tyrosyl-tRNA synthetase	1.58909	-1.33599	2.01403	1.39756	1.78809	31.9085	54.9795	29.4905	39.8712	29.9634	77.107
gene-BSU_38560	licH	6-phospho-beta-glucosidase	-1.34989	1.02809	2.49303	1.25332	-1.63029	336.773	222.585	205.412	199.393	298.719	227.896
gene-BSU_38570	licA	phosphotransferase system (PTS) lichenan-specific enzyme IIA component	-1.25592	1.13302	2.39796	1.25344	-1.64563	60.6857	32.7892	34.8982	32.2573	42.9828	43.0132
gene-BSU_38580	licC	phosphotransferase system (PTS) lichenan-specific enzyme IIC component	-1.25648	-1.11808	3.11679	1.13668	-1.75495	206.155	145.053	101.546	157.212	169.952	143.879
gene-BSU_38670	yxlE	negative regulator of sigma-Y activity	3.81608	-2.71502	1.39331	1.52414	1.29802	1.24812	5.33275	1.64698	1.56424	0.917959	2.64367
gene-BSU_38710	yxlA	putative purine-cytosine (pyridoxine) permease	-1.23205	1.6919	3.57805	1.8627	-1.32969	7.09631	12.348	11.6296	32.7415	69.4166	56.608
gene-BSU_39580	cotNE	inner spore coat protein	-2.33496	203.643	29.5463	2.12468	-2.78176	10.5272	4.58967	11.3399	10409.8	28547	6384.69
gene-BSU_39860	aldX	putative aldehyde dehydrogenase	-1.04654	-1.21621	2.05863	1.57277	-1.46368	10.2844	11.5503	5.73859	5.52396	9.27118	12.2611
gene-BSU_39980	qdoI	quercetin dioxygenase	2.02859	-1.37572	2.38914	-1.12047	1.62667	6.51387	16.2349	13.9165	17.8824	10.9076	29.8938
gene-BSU_40030	yxaB	putative exopolysaccharide pyruvyl transferase (biofilm formation)	1.06345	-1.02083	-1.02842	2.03757	-1.31188	20.3437	31.2524	17.4944	13.9895	25.007	27.113
gene-BSU_40050	gntR	transcriptional regulator (GntR-gluconate)	4.74203	1.34593	1.25315	1.40975	1.01623	0.644522	3.55699	3.26022	2.62524	1.59984	5.1194
gene-BSU_40240	yycS	putative lipoprotein	1.04294	1.37975	2.23012	-1.03481	1.72785	4.93822	3.85466	6.76695	10.4736	7.22893	17.0976
gene-BSU_40530	cotF	spore coat protein	3.51793	83.6034	6.55126	1.60086	-1.33813	3.74437	7.65134	49.8391	3648.6	5430.76	2423.44
gene-BSU_40720	yyaT	putative acetyltransferase (polyamine degradation)	-1.0685	-1.33843	1.25875	4.99305	-3.10339	1.58319	6.38857	5.10675	4.07858	19.6976	6.33416
gene-BSU_40730	yyaS	putative integral inner membrane protein	-1.02744	1.61678	1.76082	3.85778	-2.01734	3.7629	4.57376	5.65029	8.29359	31.9934	10.7186
gene-BSU_40750	yyaQ	conserved hypothetical protein	1.00737	-1.23206	1.59461	2.48654	-1.79755	42.5096	27.7617	15.4041	20.7032	56.1305	41.2879
gene-BSU_40760	yyaP	putative oxidoreductase	-1.1807	-1.1995	1.15331	2.95886	-1.83944	24.269	14.0725	10.4309	8.95095	24.8614	19.24
gene-BSU_40830	yyaK	putative integral inner membrane protease	-1.71742	1.56986	2.1263	1.45052	-1.05592	47.4411	33.1297	34.0102	65.6435	82.5061	81.425
gene-BSU_07180	yetI	putative paralog of RsbR; C-terminal part of YetI	-2.0338	1.37627	2.05872	1.19277	1.06347	25.4163	13.5743	17.468	14.2678	23.2202	40.0956
gene-BSU_13790	ykvQ	putative sporulation-specific glycosylase (HGT island)	1.04184	1.31841	10.5557	5.94308	-2.38061	1.91236	1.20159	1.92973	8.459	76.881	49.9177
gene-BSU_13799	ykzR	putative spore-specific glycosyl hydrolase	-1.53127	1.5658	4.71356	7.00552	-2.05027	5.30452	3.66627	3.29396	8.60334	86.2308	83.2756
gene-BSU_19810	spsMn	spore capsular polysaccharide biosynthesis enzyme fragment; N-terminal part of SpsM	-2.05881	-1.08623	90.0687	3.46124	-1.65901	17.5985	7.19922	4.6939	164.832	972.91	1017.75
gene-BSU_21670	spsMc	sporulation capsular polysaccharide biosynthesis enzyme C-terminal end; restored upon phage SPbeta excision	-1.63708	-1.87935	66.8916	3.19476	-1.57051	59.6874	33.8181	15.9235	260.76	1476.35	1679.94
gene-BSU_26558	yrzM	conserved hypothetical protein	-1.52205	4.63444	2.14061	3.57816	-1.16251	3.70904	3.16947	5.8732	15.03	45.9651	32.2104
gene-BSU_26559	yrzN	hypothetical protein	1.38283	3.73711	3.38898	3.50911	-1.56231	3.64036	3.11077	11.0485	31.2523	105.823	52.4328

## Sheet: cluster 9
Table S9. List of the differentially expressed genes in cluster 9
Gene_ID	Gene_Symbol	Description	fold change					Transcripts per millions mapped reads (TPM)
			10H/8H	12H/10H	15H/12H	18H/15H	24H/18H	8H	10H	12H	15H	18H	24H
gene-BSU_00380	metS	methionyl-tRNA synthetase	1.14452	1.18649	-2.15552	1.3212	-1.0959	132.156	132.786	170.125	32.9232	26.5894	66.1613
gene-BSU_01730	sigW	RNA polymerase ECF(extracytoplasmic function)-type sigma factor W	1.03525	1.53804	-2.5849	-1.19861	-1.12563	1303.7	1211.32	1099.6	253.969	149.654	436.754
gene-BSU_01740	rsiW	anti-sigma(W) factor	-1.00817	1.72405	-2.47191	-1.26323	-1.18842	642.598	550.562	675.515	126.288	75.8173	201.747
gene-BSU_02310	ybfO	putative exported hydrolase	1.15199	-1.44658	-3.38366	1.2513	-1.03174	704.343	563.885	268.337	42.9905	17.3365	101.471
gene-BSU_02350	gamP	phosphotransferase system (PTS) glucosamine-specific enzyme IICBA component	-2.74084	3.6839	-1.54366	-3.30749	-1.05954	50.389	16.4792	18.7162	6.67898	1.85298	12.0345
gene-BSU_02360	gamA	glucosamine-6-phosphate deaminase	-1.93661	3.17677	-1.76916	-2.42397	-1.23068	66.7845	32.7005	35.4167	11.5629	4.33736	19.2089
gene-BSU_03050	lctE	L-lactate dehydrogenase	1.20993	-4.1602	1.21436	-3.83795	-2.18873	1382.57	1130.92	162.407	296.458	22.2256	14.1379
gene-BSU_03060	lctP	L-lactate permease	1.06718	-3.93369	1.53615	-9.16865	-2.42548	352.44	276.509	38.9259	97.5474	4.66813	3.68748
gene-BSU_04710	rsbV	anti-anti-sigma factor (antagonist of RsbW)	2.44101	-1.94529	-2.1275	1.60209	-1.91656	284.742	497.328	204.376	78.8379	65.4546	80.7521
gene-BSU_04720	rsbW	switch protein/serine kinase and anti-sigma factor (inhibitory sigma-B binding protein)	2.04492	-1.58327	-2.21949	1.71463	-2.21574	131.378	226.062	110.634	35.6036	38.1651	40.3447
gene-BSU_04730	sigB	RNA polymerase sigma-37 factor (sigma(B))	1.7997	-1.27661	-2.39481	1.63533	-2.1055	382.594	617.956	317.329	105.417	120.171	120.111
gene-BSU_04740	rsbX	serine phosphatase	1.51343	-1.21515	-2.37082	1.90447	-2.34661	328.549	476.648	240.031	80.891	99.8315	103.123
gene-BSU_04800	ydcL	ICEBs1 mobile element: integrase	-1.20039	1.07459	-2.1536	1.46996	-1.42301	18.8233	16.7678	16.8715	3.33833	2.46841	8.35013
gene-BSU_04810	immA	ICEBs1 mobile element: site-specific protease cleaving ImmR	-1.19082	-1.0506	-2.12633	1.5195	-1.16872	11.2551	8.39909	7.93458	2.22215	1.02055	4.57199
gene-BSU_05030	yddM	ICEBs1 mobile element: putative helicase	1.06947	-1.55129	-2.75543	1.50643	-1.26401	21.7865	14.0876	9.25247	1.77846	0.460441	3.97813
gene-BSU_05470	mneP	primary Mn(II) efflux pump	-1.28404	1.5232	1.03305	-2.09369	-1.32268	4.57365	5.16723	5.10675	2.09441	1.50401	1.76984
gene-BSU_05790	ydhK	hypothetical protein	1.85544	1.77447	-3.73513	-1.30072	-2.0602	16.5406	21.3375	25.5202	9.16905	2.45643	1.078
gene-BSU_06020	groES	chaperonin small subunit	1.31969	-1.17128	-2.23718	1.74491	-2.50965	1256.73	1512.13	1392.57	226.486	176.081	421.93
gene-BSU_06030	groEL	chaperonin large subunit	1.0743	-1.31646	-1.38168	1.44564	-2.92068	3356.54	4067.57	2805.01	638.81	425.379	762.876
gene-BSU_06040	ydiM	hypothetical protein; prophage 3 region	1.65518	-1.42166	-2.813	1.59709	-2.12925	55.3105	68.7799	40.578	12.1568	6.37512	10.9286
gene-BSU_06048	ydzU	hypothetical protein; prophage 3 region	2.13858	-1.54575	-4.70211	2.42612	-2.18622	16.1296	23.9974	19.0036	3.06833	1.74765	2.44031
gene-BSU_06430	purK	N5-carboxyaminoimidazole ribonucleotide synthase	-2.30618	2.62627	-2.88569	1.58397	-1.43992	79.7324	25.0577	29.9569	9.91509	5.9577	20.4
gene-BSU_07560	pelA	pectate lyase	1.38737	1.21236	-1.89342	-2.77814	-1.11683	628.182	1768.33	1008.6	540.567	89.8379	85.7811
gene-BSU_07750	yflA	putative aminoacid transporter	3.10352	-1.07384	-4.55056	1.63696	-2.62658	23.2674	78.6525	25.7934	8.03829	8.94426	5.29294
gene-BSU_08570	yfhK	putative exported protein	5.66518	-2.5164	-2.82015	1.34562	-4.26977	89.3886	498.281	102.56	57.7233	32.5928	10.59
gene-BSU_09690	nhaX	stress response protein, UspA family	5.51822	2.67383	-13.3225	1.08844	-4.13519	58.0713	280.64	304.031	65.9933	32.8981	9.64068
gene-BSU_10310	yhfO	putative N-acetyltransferase	2.09049	1.26097	-3.56288	1.03668	-1.39928	12.5811	26.8771	59.7196	3.9419	4.14458	7.21722
gene-BSU_10380	hemAT	heme-based dioxygen sensor	-1.26844	1.96749	-2.74577	-1.6502	2.1607	257.626	143.412	279.409	91.3024	25.4098	37.3746
gene-BSU_11040	yitM	conserved hypothetical protein	5.8345	1.05954	-1.97459	-6.24024	1.41238	153.634	1543.28	2117.41	900.74	111.511	49.3959
gene-BSU_11055	yitO	putative integral inner membrane protein with HTTM domain	2.49895	-1.53149	-2.67895	-4.57649	-1.03048	7.27132	39.2861	28.2272	9.74878	1.53906	0.716349
gene-BSU_11070	yitP	conserved hypothetical protein	3.03609	-1.4098	-1.47727	-6.76394	1.1978	2.19642	22.6791	21.4476	10.3686	0.807701	0.930453
gene-BSU_11970	yjcS	conserved hypothetical protein; phage island	-1.27702	1.02625	-2.28474	-1.15854	-1.05926	102.37	93.2352	53.5114	15.8048	8.0473	18.8548
gene-BSU_11990	yjdB	putative exported protein; phage island	3.15816	1.84569	-4.25919	-2.01605	-1.52428	664.98	1431.71	2044.49	422.225	107.561	231.64
gene-BSU_12500	xkdA	phage PBSX; putative peptidase	-1.11039	-1.36739	-3.24132	1.12406	-1.34749	4.87332	6.33097	3.82365	0.577749	0.653873	0.83694
gene-BSU_14450	ampS	aminopeptidase	-1.47059	2.04697	-2.0475	-1.2057	1.37504	68.3643	49.8632	84.5731	26.2154	12.9452	39.9831
gene-BSU_15260	ylxX	conserved hypothetical protein	1.04311	1.25783	-2.16879	1.68996	-1.41317	92.5144	102.616	120.467	20.5307	21.2579	66.2205
gene-BSU_15270	sbp	putative integral inner membrane protein (small basic protein)	-1.20341	1.4312	-2.16432	1.61261	-1.35388	22.5583	21.5714	28.9167	5.25048	4.74028	16.6096
gene-BSU_15700	coaBC	coenzyme A biosynthesis bifunctional protein CoaBC; phosphopantothenoylcysteine synthetase/decarboxylase	-1.00713	1.218	-2.02878	1.09674	-1.10496	72.4493	91.3513	107.839	23.8096	21.1006	37.2387
gene-BSU_15710	priA	primosomal replication factor Y (primosomal protein N')	1.08907	1.06132	-2.05864	-1.08718	1.02879	86.1762	114.489	120.324	30.6687	18.6015	38.366
gene-BSU_15770	prkC	protein serine/threonine kinase	1.07696	1.21499	-2.26343	1.0162	-1.0233	185.493	243.604	196.009	48.5145	29.2053	80.4527
gene-BSU_16010	ylqD	conserved hypothetical protein	-1.09011	1.06348	-2.26237	1.04312	1.30525	39.2142	46.8786	35.1229	8.14862	4.14683	20.2271
gene-BSU_17120	pksE	enzyme involved in bacillaene synthesis	-1.5143	1.4474	-2.00341	1.12991	-1.37994	81.0207	73.8566	44.134	13.8582	12.18	42.0354
gene-BSU_18590	yoaG	putative phage-related membrane protein	-1.00587	1.18767	-2.62156	-1.34428	1.28238	68.3416	55.5792	57.132	12.288	4.60509	20.7675
gene-BSU_18920	phrK	secreted regulator of the activity of phosphatase RapK	1.10669	1.21464	-1.89913	1.72465	-2.24607	74.796	45.0683	71.704	18.027	14.4579	25.7274
gene-BSU_19030	yobO	putative phage-related pre-neck appendage protein; defective prophage 6	2.02108	-1.38044	-2.5283	2.11867	-2.21511	716.682	1002.83	788.892	169.293	170.144	217.321
gene-BSU_19050	yobQ	putative transcriptional regulator (AraC/XylS family)	-1.24783	1.34184	-2.12202	1.02826	1.09195	18.0875	19.0888	18.4367	3.05416	3.64433	12.9616
gene-BSU_19060	yobR	putative acetyltransferase	-1.41094	1.50559	-3.30616	1.57244	1.38124	17.3328	14.9016	20.5009	3.11272	2.33191	12.76
gene-BSU_19230	azoJ	FMN-dependent NADH-azoreductase	-1.22818	1.81789	-1.20684	-3.93917	1.56211	38.1245	23.5764	36.7379	38.2716	4.01223	11.9534
gene-BSU_20950	yopB	putative transcriptional regulator, lambda repressor-like; phage SPbeta	-1.45774	1.94986	-3.2863	1.43278	1.65541	3.44876	1.47352	1.82035	0.216113	0.190235	2.55671
gene-BSU_21140	yonC	conserved protein of unknown function; phage SPbeta	-1.26033	1.50637	-2.9392	2.08773	-1.20321	2.34284	1.87689	3.47798	0.550544	0.646161	2.01598
gene-BSU_22420	panC	pantothenate synthetase	1.80561	-1.2306	-2.14319	-1.21628	-1.0501	47.3069	204.953	138.829	33.1925	17.2789	41.6861
gene-BSU_22430	panB	ketopantoate hydroxymethyltransferase	1.81686	-1.19532	-2.19771	-1.19073	-1.11271	62.5094	270.402	186.867	46.556	22.7269	61.0088
gene-BSU_22570	ypiF	conserved protein of unknown function	1.23727	-1.0313	-2.25693	1.23883	-1.44915	85.844	108.23	107.938	24.8022	18.0481	33.9064
gene-BSU_22580	ypiB	conserved protein of unknown function	2.19908	-1.56195	-1.9051	-1.08993	-1.14935	924.068	1741.57	1378.85	480.327	200.402	329.093
gene-BSU_22780	folEA	GTP cyclohydrolase I	1.14378	1.29071	-2.31068	1.05822	1.01235	121.447	177.363	200.095	37.3207	27.6289	83.5662
gene-BSU_23450	sigF	RNA polymerase sporulation-specific sigma factor (sigma-F)	3.24484	-1.97313	-2.88305	1.80935	-1.72578	2015.45	8530.54	6968.26	1215.1	741.191	873.309
gene-BSU_23460	spoIIAB	anti-sigma factor (antagonist of sigma(F)) and serine kinase	3.49365	-2.08347	-2.72457	1.68563	-1.5987	1201.05	5025.36	4289.21	724.133	471.11	513.249
gene-BSU_24620	tasA	major biofilm matrix component	1.82479	-2.60866	-1.79158	-1.09791	-2.07781	389.057	2068.14	596.025	79.678	14.4027	60.4966
gene-BSU_24630	sipW	type I signal peptidase	1.4442	-1.82931	-2.34122	1.01597	-1.99927	32.6603	132.509	48.1678	3.86966	1.6653	6.10397
gene-BSU_24640	tapA	lipoprotein for biofilm formation	1.69194	-1.76292	-2.65537	1.29669	-1.3973	9.90635	30.0912	19.1997	2.39256	0.626127	5.46428
gene-BSU_24770	mgsR	transcriptional regulator of stress	4.5856	-3.18548	-2.11106	1.51374	-2.73571	76.5679	284.82	40.578	31.4265	18.1008	9.17998
gene-BSU_25840	phrE	regulator peptide of the activity of phosphatase RapE; skin element	1.20733	-1.46252	-1.18317	1.38283	-2.31506	66.9825	85.2352	137.578	22.9944	13.1727	24.0574
gene-BSU_25880	yqxJ	hypothetical protein; skin element	1.30231	1.29049	-2.0122	1.11377	-1.31435	128.67	162.891	124.912	40.7221	25.8091	105.987
gene-BSU_26780	yrdA	conserved protein of unknown function	2.26754	1.13396	-5.81954	1.69515	-2.03598	186.594	431.62	599.09	28.4497	22.8916	56.6737
gene-BSU_27100	yrhP	putative amino acid exporter	-1.74242	-1.55839	-1.20663	-2.72849	-1.06963	589.303	358.52	170.147	103.841	13.293	49.2023
gene-BSU_27150	yrhK	conserved protein of unknown function	-1.24309	2.14009	-3.97588	1.61485	-1.22088	9.18721	8.37023	11.41	2.70921	2.3848	3.72022
gene-BSU_28830	ysdB	conserved protein of unknown function	-1.15938	1.22802	-1.72049	-2.25681	1.29388	343.538	189.781	249.235	120.739	26.7084	36.8701
gene-BSU_28890	yscB	putative lipoprotein	-3.34885	2.36006	-4.76633	-1.38017	-1.54246	113.461	27.2403	31.1591	10.2099	4.03778	2.87588
gene-BSU_29520	yteJ	putative integral inner membrane protein	-1.63732	1.10986	-1.30938	-2.0287	1.11117	569.325	389.073	270.195	131.197	44.2498	82.2662
gene-BSU_29530	sppA	signal peptide peptidase	-1.43296	1.13793	-2.23629	-1.62529	-1.08023	330.128	235.474	173.86	40.7192	22.1601	44.2815
gene-BSU_29760	brxJ	bacilliredoxin involved in debacillithiolation	1.4593	1.03275	-2.95573	1.62083	-1.48995	1325.44	1741.98	1302.23	305.738	255.068	440.826
gene-BSU_29770	ytxH	conserved protein of unknown function	1.59956	-1.20881	-2.49615	1.53504	-1.35588	1532.11	2020.57	1411.68	344.592	290.298	502.21
gene-BSU_29780	ytxG	general stress protein	1.96654	-1.5597	-2.95523	1.76689	-1.63958	546.518	861.949	458.211	105.42	91.7715	154.345
gene-BSU_30450	ytrB	ABC transporter (ATP-binding protein) involved in resistance to cell wall inhibitors	-1.10913	-1.0797	-2.02761	1.10606	-1.50752	34.351	31.628	28.8025	2.971	3.01	9.37916
gene-BSU_30460	ytrA	transcriptional regulator (GntR family, cell wall antibiotics)	1.57993	1.03035	-3.05896	1.28746	1.07269	6.00242	7.26639	12.937	1.62992	0.331096	4.66174
gene-BSU_30650	dps	DNA-protecting protein, mini-ferritin	1.85385	1.00049	-2.96548	1.156	-1.2663	408.238	560.323	536.567	115.984	75.5571	102.098
gene-BSU_30660	ytkA	putative lipoprotein	-1.55449	1.18194	-1.11813	-2.00566	-1.19383	231.407	92.6201	63.014	53.4361	13.3686	51.3343
gene-BSU_31020	nfeDB	putative membrane integrity integral membrane protein	1.0071	2.57806	-2.62436	-1.65672	1.33542	298.651	229.895	319.976	109.059	50.1481	114.048
gene-BSU_31280	yugU	conserved protein of unknown function	-1.03002	-1.37895	-1.13452	1.16864	-2.18936	118.046	104.831	58.5112	20.7468	13.6969	34.8547
gene-BSU_31875	yukAB	ESX secretion system FtsK/SpoIIIE family ATPase	-1.01187	1.05564	1.38475	-1.10292	-2.18609	63.494	124.77	61.2895	36.8784	27.8913	65.5368
gene-BSU_31890	yukC	ESX secretion system YukC protein	-1.02993	1.34914	1.00255	1.11624	-2.16818	27.8922	47.1365	27.7764	10.3562	9.404	25.7319
gene-BSU_31945	yukJ	conserved protein of unknown function	2.01473	-1.64117	-1.52578	1.44479	-2.08381	684.954	748.733	697.548	215.191	177.78	257.688
gene-BSU_31959	mbtH	stimulator of DhbF tyrosine adenylation activity	-1.8244	1.01129	1.12491	-5.31918	-2.00028	9.73535	25.9972	9.3878	12.2011	2.27195	2.3793
gene-BSU_31960	dhbF	siderophore 2,3-dihydroxybenzoate-glycine-threonine trimeric ester bacillibactin synthetase	-1.56873	-1.10163	-1.06357	-3.28038	-3.54661	111.023	419.307	69.7984	105.016	40.4747	23.0096
gene-BSU_31970	dhbB	isochorismatase (siderophore specific)	-1.93848	1.12367	-1.23926	-2.91536	-2.66537	76.8731	218.43	36.6861	57.932	22.6337	14.2783
gene-BSU_31980	dhbE	2,3-dihydroxybenzoate-AMP ligase	-2.23191	1.21871	-1.10542	-3.33103	-3.45823	84.6989	240.152	43.9378	63.3258	27.0683	13.2624
gene-BSU_31990	dhbC	isochorismate synthase (siderophore-specific)	-2.14085	1.08659	1.06585	-3.55903	-3.00592	105.631	275.409	57.3843	86.9391	34.4597	16.1403
gene-BSU_32000	dhbA	2,3-dihydro-2,3-dihydroxybenzoate dehydrogenase	-1.97167	1.05128	1.43705	-3.16739	-2.24226	58.7237	132.291	24.8179	61.9996	22.349	12.8198
gene-BSU_32230	yuxL	putative acylaminoacyl-peptidase	-1.15131	-1.47492	1.1637	-1.34621	-2.19197	577.588	708.859	365.21	139.609	75.4972	167.564
gene-BSU_32400	yunG	conserved protein of unknown function	-1.0063	-1.30333	1.20017	-2.02769	-1.29357	15.1389	15.688	5.96321	7.07955	3.48983	4.30736
gene-BSU_32540	bsnA	extracellular ribonuclease	1.81985	-1.08029	1.25587	-2.64639	1.28744	55.9582	85.6378	95.9809	81.9523	15.6585	23.0521
gene-BSU_32810	yusI	putative oxidoreductase with thioredoxin domain and regulator domain	-1.81497	1.73426	-1.04988	-2.01411	1.20382	106.164	58.8172	45.9217	18.4949	9.47658	52.9511
gene-BSU_33250	rsiO	acid stress-sensitive anti sigma factor	-1.16656	2.46229	-4.95061	1.37037	-1.88259	4.20899	3.47408	9.84583	1.07899	1.05532	1.2157
gene-BSU_33510	copZ	copper insertion chaperone and transporter component	-1.05725	1.59528	1.18639	-1.19637	-2.34403	17.5985	8.39909	18.7756	23.6983	12.3924	8.32756
gene-BSU_33530	iolW	scyllo-inositol 2-dehydrogenase (NADP(+)-dependent)	1.61831	1.75826	-2.47031	1.11667	-2.42427	100.608	189.272	121.583	43.3261	41.2794	42.4497
gene-BSU_34220	epsO	pyruvyl transferase for matrix biofilm formation	1.19292	-1.78277	-2.4049	1.13822	-2.6628	73.1948	372.628	100.44	11.8989	7.29607	17.6176
gene-BSU_34230	epsN	putative aminotransferase involved in biofilm matrix formation	1.13989	-1.64651	-2.02109	-1.08275	-2.19213	55.1837	258.45	83.3102	8.74006	5.90951	14.7712
gene-BSU_34250	epsL	putative phosphotransferase involved in extracellular matrix synthesis	-1.08007	-1.52554	-1.85738	-1.04566	-2.24513	24.9194	101.644	36.9719	4.04546	2.99128	5.87988
gene-BSU_34290	epsI	putative polysaccharide pyruvyl transferase involved in biofilm matrix formation	1.00684	-1.48757	-2.05811	1.04632	-1.85537	23.9473	91.1656	33.4305	3.79732	2.57744	8.27343
gene-BSU_34400	padC	phenolic acid decarboxylase	1.34728	-1.53597	-1.14441	-2.19728	2.01458	26.5341	31.2806	26.0467	11.4566	2.58813	8.91014
gene-BSU_35310	hpf	ribosome-associated sigma 54 modulation protein; ribosome dimerisation factor	1.21886	1.00521	-2.1834	-1.93558	-1.16837	4287.77	3152.16	2314.57	985.042	301.636	433.91
gene-BSU_35680	ggaB	poly(glucosyl N-acetylgalactosamine 1-phosphate) glucosyltransferase	-1.70582	1.82594	-2.20032	1.09867	1.06887	19.5779	11.4971	14.7406	4.19273	2.53534	6.16172
gene-BSU_36110	chrS	transcriptional negative regulator of chromate transport (Lrp/AsnC family)	-1.37857	1.15847	-1.1365	-2.05574	1.49418	29.6723	14.7908	18.0547	9.81342	3.54627	5.7612
gene-BSU_36130	chrA	chromate transporter subunit C	-1.67559	1.35267	-1.11241	-2.28704	1.43751	54.0318	27.997	33.2341	18.902	4.44236	13.0263
gene-BSU_36640	ureC	urease (alpha subunit)	1.84372	-2.06878	-2.50552	1.41413	-2.1307	525.039	492.452	554.296	88.491	56.8929	84.0061
gene-BSU_37240	clsC	minor cardiolipin synthetase	3.04075	-1.54274	-2.67813	1.39717	-2.24986	18.5724	62.2527	26.7166	9.11383	7.58965	5.42981
gene-BSU_37350	sboA	subtilosin A	1.30103	1.81559	-10.9176	-1.59281	-1.31538	118.543	56.6302	128.128	11.9451	1.31435	6.30875
gene-BSU_37720	bacC	dihydroanticapsin 7-dehydrogenase	1.35381	1.03795	-2.21486	1.34503	-1.36674	47.8807	51.9156	41.2589	11.9628	7.91197	18.0321
gene-BSU_37730	bacB	3-((4R)-4-hydroxycyclohexa-1, 5-dien-1-yl)-2-oxopropanoate isomerase	1.50817	-1.01904	-2.30243	1.26475	1.06312	58.4184	61.3323	60.38	9.25622	11.2722	23.6418
gene-BSU_38110	nfrAA	FMN-containing NADPH-linked nitro/flavin reductase	1.31581	1.2624	-1.05041	-2.00092	1.20673	129.375	155.887	190.78	141.12	32.3278	58.515
gene-BSU_38930	yxjJ	conserved protein of unknown function	2.01317	-1.46903	-3.02872	1.47672	-1.3265	60.7608	84.9453	55.8102	16.9845	8.54328	12.6175
gene-BSU_39810	csbC	putative metabolite transporter	2.98245	1.06614	-5.32991	1.13331	-3.56629	33.0185	128.107	35.3353	13.1539	10.2957	4.62642
gene-BSU_40120	ptsJ	glucose phosphotransferase system enzyme IIA component	1.13988	-1.70889	1.11533	-2.02404	-1.15569	102.119	109.079	70.0716	47.9939	6.00846	12.6175
gene-BSU_40310	phrG	secreted regulator of the activity of phosphatase RapG	2.08094	-1.22367	-1.29469	-1.32362	-1.29239	313.855	430.723	379.566	306.171	115.292	120.287
gene-BSU_35150	yvzB	putative flagellin	1.09517	1.08456	-2.51138	-1.23834	1.82379	13.1867	11.1292	12.0301	3.77459	1.2572	4.31033
gene-BSU_35699	yvzE	putative UTP-glucose-1-phosphate uridylyltransferase (UDP-glucose pyrophosphorylase) (UDPGP) (fragment)	1.11725	1.57915	-2.50714	1.16418	-1.71502	17.9127	16.4605	21.2039	3.87917	5.59424	8.50889

## Sheet: cluster 10
Table S10. List of the differentially expressed genes in cluster 10
Gene_ID	Gene_Symbol	Description	fold change					Transcripts per millions mapped reads (TPM)
			10H/8H	12H/10H	15H/12H	18H/15H	24H/18H	8H	10H	12H	15H	18H	24H
gene-BSU_00590	hslR	ribosomal RNA binding protein involved in 50S recycling; heat shock protein	-1.64918	1.82725	1.40039	-2.44642	2.15234	95.5028	46.6616	57.2468	65.3207	12.9622	38.9257
gene-BSU_00730	cysK	cysteine synthase	-2.44766	1.61633	2.44899	-2.40312	1.71621	629.986	315.396	323.816	752.181	185.285	348.464
gene-BSU_01600	eesA	iron-chelator (enterobactin family) esterase	-2.44909	1.8639	1.24113	-1.45349	1.15249	8.35396	6.46942	4.68504	3.92619	3.91687	5.08722
gene-BSU_01610	feuC	iron-uptake protein	-1.99791	2.39285	1.14083	-1.43861	1.22647	10.8887	9.38771	8.41574	7.01821	5.57721	7.66036
gene-BSU_02140	glpT	sn-glycerol-3-phosphate permease	-2.05199	1.72354	1.73262	-2.00919	1.33345	38.0495	24.1592	21.9955	24.2124	4.6785	20.8345
gene-BSU_02670	lmrB	flavonoid efflux transporter; drug-export protein	-1.67693	1.42737	1.9737	-2.05917	1.43341	83.8192	76.6417	70.0379	130.61	38.7049	68.2397
gene-BSU_02680	lmrA	transcriptional repressor of lmrAB and yxaGH operons (flavonoid and antibiotic resistance)	-1.23231	1.05942	2.10902	-2.29167	1.46615	121.623	153.761	137.798	183.451	50.6407	98.8438
gene-BSU_02950	niaP	niacin permease	-1.98763	1.57554	2.095	-2.45437	1.74501	23.596	13.7541	11.7301	21.6673	4.18232	11.6295
gene-BSU_03070	mdr	multidrug-efflux transporter	-2.66077	1.37152	1.96279	-3.84741	1.86847	54.2094	26.3597	19.5519	46.2001	5.86205	10.2809
gene-BSU_03180	cah	promiscuous acetyl xylan esterase-cephalosporin C deacetylase	-4.15666	3.26933	1.93794	-3.22444	1.9236	19.7195	5.61695	13.5528	27.5459	4.53224	8.26665
gene-BSU_03270	ffoR	Fur-regulated NADPH:ferredoxin oxidoreductase	-1.32437	-1.37275	2.46126	-1.99852	1.00472	66.1875	100.44	35.305	73.6912	29.9453	33.1949
gene-BSU_03590	tcyC	cystine ABC transporter (ATP-binding protein)	-1.45746	2.15622	1.91246	-2.31451	1.69946	22.4058	13.434	18.9669	40.5978	10.6685	16.2298
gene-BSU_03750	yclJ	two-component response regulator [YclK] (possibly involved in arabinogalactan metabolism)	-1.27885	1.20977	1.64855	-2.43809	2.21945	16.8989	13.1389	13.1975	15.416	3.04376	8.8876
gene-BSU_03840	ycnB	putative efflux transporter	-1.96511	1.14828	2.35767	-2.14729	1.39403	147.511	122.465	76.5586	159.558	44.8713	86.0925
gene-BSU_03850	ycnC	putative transcriptional regulator (TetR/AcrR family)	-1.23162	1.25904	2.04451	-1.73923	1.5524	42.9388	40.4188	37.8918	61.3819	21.1687	56.0855
gene-BSU_03860	nfrAB	NADPH-FMN oxidoreductase (nitroreductase)	-1.50819	1.57126	2.32161	-2.69998	1.91762	152.021	89.8143	75.8139	201.234	40.7711	60.7357
gene-BSU_03870	ycnE	putative AI-2 degrading enzyme	-1.83836	2.30192	1.95367	-2.71502	2.30033	43.6843	18.0814	22.6975	61.5921	11.4458	24.867
gene-BSU_04510	ydbL	putative glyco-prenyl flippase subunit	1.2646	1.33487	1.33778	-2.8443	1.35395	162.412	141.485	206.285	289.776	52.0224	91.7023
gene-BSU_05329	ydzO	hypothetical protein	-2.1117	2.8808	-1.78923	-1.52809	1.58688	22.8286	13.9985	31.7974	8.74211	3.96425	17.461
gene-BSU_05980	tatAY	component of the twin-arginine pre-protein translocation pathway	1.14354	-1.02921	1.21732	-2.13247	1.46655	151.84	111.022	115.686	88.3528	20.939	61.2602
gene-BSU_07380	yfmQ	conserved hypothetical protein	-1.12979	1.60944	1.22682	-2.6323	1.02561	174.678	46.0353	123.723	98.1065	16.3015	53.2815
gene-BSU_07620	yflN	putative metal-dependent hydrolase	-6.46247	4.2875	2.27436	-3.26581	2.5214	240.84	23.1371	100.366	237.134	50.7934	69.3439
gene-BSU_07700	nagP	phosphotransferase system (PTS) N-acetylglucosamine-specific enzyme IICB component	-2.3572	1.57062	6.6444	-4.12448	-1.40165	144.939	52.9038	44.6648	311.595	44.0757	30.8837
gene-BSU_08230	catD	catechol-2,3-dioxygenase membrane subunit	1.23093	1.30719	2.15878	-3.19183	2.41099	3.49474	5.80678	8.45451	13.018	2.46319	4.93485
gene-BSU_08480	yfhC	putative oxidoreductase (nitroreductase family)	-1.52196	-1.03663	2.37307	-1.76827	1.02142	230.787	173.581	108.904	215.204	67.5441	107.618
gene-BSU_09250	yhcX	putative amidohydrolase	-1.39094	1.83702	1.77843	-2.15955	1.58972	126.514	98.9698	102.616	181.469	44.78	87.812
gene-BSU_09710	bmrC	efflux ABC transporter (ATP-binding protein)	1.07901	-1.31857	1.36703	-1.53923	2.30265	79.2579	83.2265	54.713	55.8043	20.3051	56.1329
gene-BSU_09730	yheG	putative NADH-flavin oxidoreductase	-2.1642	1.3289	1.48847	-1.47171	-1.07202	45.0771	30.8372	25.8982	29.7546	11.3148	26.9539
gene-BSU_10160	yhgE	putative methyl-accepting protein	-1.21087	1.30113	1.53036	-2.21155	1.40206	15.0305	14.251	12.8363	13.5672	3.46541	8.19163
gene-BSU_10260	yhfK	putative NAD-binding epimerase / hydratase	-1.43532	1.31681	1.93218	-2.55559	1.65713	312.82	241.555	203.176	320.47	69.8684	148.088
gene-BSU_10270	lcfB	long-chain fatty-acid-CoA ligase (degradative)	1.01009	2.02374	2.53854	-3.89058	-1.49514	153.082	100.386	132.425	175.749	23.1494	111.682
gene-BSU_10650	sbcC	DNA ATP-dependent repair enzyme	-1.52605	1.18909	1.51058	-2.00706	1.59024	97.1019	62.6776	45.0146	53.5142	13.1667	36.6678
gene-BSU_10660	hlpB	HNH nuclease-like essential for DNA repair	-1.33464	1.71262	1.74479	-2.662	1.84767	102.247	80.9417	97.5959	163.433	26.3391	55.7919
gene-BSU_12840	pitB	putative low-affinity inorganic phosphate transporter	-2.3463	1.65703	1.62447	-2.36615	1.51831	126.58	68.7351	62.1317	79.074	16.8819	77.4579
gene-BSU_12850	ykaA	putative PitB transporter accessory protein	-2.50915	2.10846	1.55375	-1.83603	1.61096	57.1288	22.1529	25.856	37.9519	9.96609	44.8718
gene-BSU_13230	thiV	thiamine transporter, permease component	-1.04625	-1.14642	1.64996	-2.43056	1.34983	2.88316	3.21965	1.5564	1.64246	0.795182	0.832756
gene-BSU_14060	fadH	putative 2,4-dienoyl-CoA reductase	-2.07404	3.68427	2.26274	-8.48115	-1.26158	120.877	32.8278	59.5433	78.065	6.6336	29.3914
gene-BSU_14071	ykuG	putative cell wall-binding protein	-2.08661	3.09337	1.22149	-4.10534	-1.04886	141.274	35.6634	51.9099	56.1339	6.96583	37.0434
gene-BSU_14072	ykzU	conserved hypothetical protein	-1.92224	3.43273	1.1342	-3.90177	1.00587	124.084	32.3664	54.7788	58.0081	5.93357	37.3858
gene-BSU_14150	fldN	short-chain flavodoxin (acts in lipid desaturation)	-1.51153	1.35091	3.19359	-2.71402	-1.6245	37.0904	66.7349	33.934	127.988	44.1919	22.5211
gene-BSU_14160	ykuO	conserved hypothetical protein	-1.73649	1.3341	3.9907	-2.83364	-1.48308	79.7751	167.794	51.4157	341.664	109.792	40.1474
gene-BSU_14170	fldP	short-chain flavodoxin	-1.69779	1.62939	4.24192	-2.62669	-1.31871	19.8304	32.4175	15.0179	96.1702	36.2397	11.6878
gene-BSU_14390	fruK	fructose-1-phosphate kinase	1.30575	1.24323	-1.09758	-2.0842	1.55735	30.9526	29.01	29.4669	21.6653	5.56437	14.4271
gene-BSU_14400	fruA	phosphotransferase system (PTS) fructose-specific enzyme IIABC component	-1.20743	1.42995	1.51221	-2.75608	2.01557	68.947	45.2089	59.1127	64.3812	13.7077	26.1873
gene-BSU_15460	rluD	pseudouridylate synthase	-2.30057	2.59875	1.89322	-1.96792	1.6203	38.6261	21.8266	36.0657	54.4064	14.6481	40.7247
gene-BSU_15480	pyrP	uracil permease	-2.22761	1.73279	2.44547	-3.00304	2.03572	37.6326	9.05406	9.99522	31.6813	5.23931	10.0593
gene-BSU_16800	spoIIIE	spore DNA directional translocase (motor ATPase)	-1.3977	1.25138	1.70157	-2.26792	1.94172	61.1358	50.025	49.7731	74.3691	14.2927	45.3366
gene-BSU_17620	yncB	DNA nuclease, lipoprotein (phage origin)	-2.27853	2.2773	1.40468	-1.7995	1.81676	4.57448	2.50916	4.07861	3.48635	2.25052	4.97558
gene-BSU_18500	yoxD	putative oxido-reductase	-1.50121	2.00841	-1.09508	-1.54306	1.28486	102.759	71.5738	102.602	57.5203	25.2861	78.3975
gene-BSU_18730	yoaS	putative toxin of a toxin / antitoxin system	-1.73811	1.66364	-1.21017	-2.05894	2.60523	7.48873	2.08673	3.43718	3.26451	0.718403	2.41378
gene-BSU_18740	yozG	putative antitoxin of a toxin / antitoxin system; putative transcriptional regulator	-1.33459	1.35402	1.14968	-2.32934	2.28792	10.1759	3.95251	2.44141	9.27505	1.70092	3.91885
gene-BSU_20560	yoqO	putative membrane protein; phage SPbeta	-1.02598	1.01777	2.74666	-1.88257	-1.43474	34.5979	32.9244	30.7129	68.589	10.641	30.8675
gene-BSU_21329	youB	conserved phage protein of unknown function; phage SPbeta	-1.62014	3.09487	2.13637	-7.37649	4.04975	2.22123	0.474525	6.44835	8.62986	0.490097	1.88193
gene-BSU_23020	recS	ATP-dependent DNA helicase	-1.64122	2.07401	2.15079	-2.40295	2.01895	44.8796	31.7712	28.1147	95.474	19.8105	52.6127
gene-BSU_27920	obgE	ppGpp-binding GTPase involved in cell portioning, DNA repair and ribosome assembly	-1.20839	-1.02275	1.38221	-2.1008	1.62427	176.875	175.878	164.79	140.202	30.5671	99.193
gene-BSU_28520	etfA	electron transfer flavoprotein (alpha subunit)	-1.07545	1.57932	1.66945	-2.52606	-1.01101	1172.96	849.957	815.862	1135.66	253.279	560.365
gene-BSU_28530	etfB	electron transfer flavoprotein (beta subunit)	1.03068	1.49094	1.4683	-2.20921	1.06492	1078.7	775.342	675.378	1021	233.959	557.968
gene-BSU_28540	fadB	enoyl-CoA hydratase	1.18811	1.47613	1.50955	-2.91637	1.26843	752.314	663.496	541.501	832.897	109.857	414.663
gene-BSU_28550	fadR	transcriptional regulator of fatty acids degradation [FadR-long-chain (C14-C20) acyl-CoAs]	1.30362	1.32363	1.69436	-2.90328	1.30865	653.517	601.289	433.663	956.752	99.8704	380.932
gene-BSU_28820	frvX	putative fructose-lysine aminopeptidase	-1.44725	1.42938	1.33473	-2.31977	1.35802	276.007	225.987	182.583	208.574	42.9742	112.721
gene-BSU_29740	ccpA	transcriptional regulator of catabolite repression (Lacl family)	-2.84779	1.58249	1.96489	-2.45873	1.62439	112.119	55.1582	53.377	80.652	18.6442	62.8917
gene-BSU_30050	murJ	lipid II flippase	-2.01215	1.17638	1.9445	-1.97692	1.18662	86.7594	59.5385	47.7867	58.6764	16.1822	47.5206
gene-BSU_30520	ytoA	putative enzyme of the carbonic anhydrase family	-1.55295	1.2651	1.86906	-2.33978	1.81692	89.2988	58.4355	55.9016	95.1097	21.0984	51.4824
gene-BSU_30550	metK	S-adenosylmethionine synthetase	-1.70489	1.93826	2.59403	-2.54339	1.98958	268.38	224.674	229.427	734.231	133.438	286.446
gene-BSU_30990	thiT	thiamin permease	-2.28429	1.81129	1.75571	-2.05437	1.48669	2.44451	1.45062	1.61285	1.70203	0.449467	1.43826
gene-BSU_31360	bdhK	NADH-dependent butanol dehydrogenase subunit	-1.03575	1.91065	-1.13252	-2.37942	2.21105	46.9243	40.0264	59.0892	61.9597	12.8309	26.0547
gene-BSU_31370	bdhJ	NADH-dependent butanol dehydrogenase	-1.4491	1.60671	1.29438	-3.0186	2.16213	385.052	233.068	306.555	348.98	53.8071	132.712
gene-BSU_32010	besA	bacillibactin trilactone hydrolase	-1.35249	1.09957	1.88058	-2.60316	1.45098	122.286	251.49	101.375	216.125	68.251	69.492
gene-BSU_32790	yusG	conserved protein of unknown function	-1.36714	1.51536	2.11402	-1.91834	1.23692	936.281	794.901	876.486	1482.37	252.921	859.46
gene-BSU_32840	fadN	bifunctional enoyl-CoA hydratase / 3-hydroxyacyl-CoA dehydrogenase	-1.30926	6.18767	2.40195	-8.32584	1.04701	325.31	123.825	288.426	1217.48	99.9788	180.782
gene-BSU_33010	cssR	folding stress-sensitive two-component response regulator	-1.69894	1.03727	2.05102	-2.45176	1.48897	28.5301	12.7597	11.7839	14.2443	3.39056	12.651
gene-BSU_33500	copA	copper transporter ATPase	-1.25886	1.2226	1.62632	-2.47582	-1.00924	45.1096	40.3742	37.2571	53.9577	12.9815	15.4867
gene-BSU_34120	ganB	endo-beta-1,4-galactanase	-1.32221	1.11211	1.0655	-1.78749	2.2113	98.1372	51.9572	41.504	36.8216	11.7344	18.9145
gene-BSU_34130	ganA	short chain beta-1,4-galacto-oligosaccharides beta-galactosidase (beta-galacto-pyranoside hydrolase)	-1.52684	1.56797	1.61864	-2.3921	2.13518	314.489	156.75	117.283	220.037	57.8524	93.7657
gene-BSU_35280	yvjA	putative integral inner membrane protein	-1.77927	2.30362	1.23421	-1.91058	1.96221	20.7907	14.995	18.6416	17.6494	6.02819	17.0315
gene-BSU_36710	fdhD	protein sulfur transferase involved in molybdenum cofactor synthesis	-1.57753	1.80762	1.32289	-2.04099	1.81199	15.6466	9.68716	17.0961	16.487	4.56274	13.0877
gene-BSU_36980	ywlA	putative integral inner membrane protein	-1.28454	1.03568	1.24734	-1.44233	2.21676	9.74773	2.77656	7.146	5.15813	1.7923	12.3881
gene-BSU_37310	fnr	transcriptional regulator of anaerobic metabolism (FNR/CAP family)	1.08892	2.11901	1.17468	-4.00059	1.04723	27.7459	11.7142	23.0095	34.2236	4.59748	8.47855
gene-BSU_37660	pta	phosphotransacetylase	-1.85698	2.11809	1.85644	-2.89249	1.99028	79.926	57.1173	87.7476	133.323	20.9282	62.5424
gene-BSU_37960	ywdH	putative aldehyde dehydrogenase	-1.1501	2.19246	1.01418	-2.35899	1.84539	10.553	11.0885	16.4987	14.951	4.11274	7.77482
gene-BSU_38290	thiE	thiamine-phosphate pyrophosphorylase (thiamine phosphate synthase)	-1.74912	-1.10849	1.98483	-2.51259	1.88871	36.7888	15.3167	14.424	13.6994	2.334	14.3149
gene-BSU_38340	ywbF	putative sugar permease	-2.09795	1.21563	1.76083	-1.71291	1.35769	48.293	31.1466	17.0339	23.7335	6.75905	33.5878
gene-BSU_38910	yxjL	two-component response regulator [YxjM]	-1.62004	1.68937	-1.01212	-2.12596	1.93084	9.814	7.0312	9.94958	7.87479	1.78248	5.07005
gene-BSU_39020	nupG	purine nucleoside transporter	-2.33539	1.96437	1.7438	-2.84409	1.88781	52.948	26.4494	40.7566	76.139	15.2934	18.3429
gene-BSU_39610	frxB	desferrioxamine-and ferrichrome-binding transporter lipoprotein (shuttle system)	-2.45853	1.17228	1.94013	-2.80933	1.00916	67.073	77.5568	31.4717	60.6995	18.1846	16.7241
gene-BSU_40520	yybS	putative integral inner membrane protein	-1.18173	1.34479	1.42863	-1.99113	2.17185	56.8177	46.0595	47.0824	57.8039	14.0381	38.2351
